# Supplementary material for: GigaAssay – a high-throughput assay system for molecular functions and cell processes
Source: Research Square preprint supplement (doi:10.21203/rs.3.rs-708936/v1), 2021-07-12
Supplement: Supplementary file 1 [file 11eb19cdcbf2e349d975dad7.xlsx]

## Sheet: Sheet1
NGS Primer FP1	AATGATACGGCGACCACCGAGATCTACACTCTTTCCCTACACGACGCTCTTCCGATCTTAAGTAGAGTCTATATAAGCAGAGCTGGTTTAGTGAACCGT
NGS Primer FP2	AATGATACGGCGACCACCGAGATCTACACTCTTTCCCTACACGACGCTCTTCCGATCTATCATGCTTATCTATATAAGCAGAGCTGGTTTAGTGAACCGT
NGS Primer FP3	AATGATACGGCGACCACCGAGATCTACACTCTTTCCCTACACGACGCTCTTCCGATCTGATGCACATCTTCTATATAAGCAGAGCTGGTTTAGTGAACCGT
NGS Primer FP4	AATGATACGGCGACCACCGAGATCTACACTCTTTCCCTACACGACGCTCTTCCGATCTCGATTGCTCGACTCTATATAAGCAGAGCTGGTTTAGTGAACCGT
NGS Primer FP5	AATGATACGGCGACCACCGAGATCTACACTCTTTCCCTACACGACGCTCTTCCGATCTTCGATAGCAATTCTCTATATAAGCAGAGCTGGTTTAGTGAACCGT
NGS Primer FP6	AATGATACGGCGACCACCGAGATCTACACTCTTTCCCTACACGACGCTCTTCCGATCTATCGATAGTTGCTTTCTATATAAGCAGAGCTGGTTTAGTGAACCGT
NGS Primer FP7	AATGATACGGCGACCACCGAGATCTACACTCTTTCCCTACACGACGCTCTTCCGATCTGATCGATCCAGTTAGTCTATATAAGCAGAGCTGGTTTAGTGAACCGT
NGS Primer FP8	AATGATACGGCGACCACCGAGATCTACACTCTTTCCCTACACGACGCTCTTCCGATCTCGATCGATTTGAGCCTTCTATATAAGCAGAGCTGGTTTAGTGAACCGT
NGS Primer FP9	AATGATACGGCGACCACCGAGATCTACACTCTTTCCCTACACGACGCTCTTCCGATCTACGATCGATACACGATCTCTATATAAGCAGAGCTGGTTTAGTGAACCGT
NGS Primer FP10	AATGATACGGCGACCACCGAGATCTACACTCTTTCCCTACACGACGCTCTTCCGATCTTACGATCGATGGTCCAGATCTATATAAGCAGAGCTGGTTTAGTGAACCGT
NGS Primer RP1	CAAGCAGAAGACGGCATACGAGATTCGCCTTGGTGACTGGAGTTCAGACGTGTGCTCTTCCGATCTAATTGTGGATGAATACTGCCATTTGTCTCGA
NGS Primer RP2	CAAGCAGAAGACGGCATACGAGATATAGCGTCGTGACTGGAGTTCAGACGTGTGCTCTTCCGATCTAATTGTGGATGAATACTGCCATTTGTCTCGA
NGS Primer RP3	CAAGCAGAAGACGGCATACGAGATGAAGAAGTGTGACTGGAGTTCAGACGTGTGCTCTTCCGATCTAATTGTGGATGAATACTGCCATTTGTCTCGA
NGS Primer RP4	CAAGCAGAAGACGGCATACGAGATATTCTAGGGTGACTGGAGTTCAGACGTGTGCTCTTCCGATCTAATTGTGGATGAATACTGCCATTTGTCTCGA
NGS Primer RP5	CAAGCAGAAGACGGCATACGAGATCGTTACCAGTGACTGGAGTTCAGACGTGTGCTCTTCCGATCTAATTGTGGATGAATACTGCCATTTGTCTCGA
NGS Primer RP6	CAAGCAGAAGACGGCATACGAGATGTCTGATGGTGACTGGAGTTCAGACGTGTGCTCTTCCGATCTAATTGTGGATGAATACTGCCATTTGTCTCGA
NGS Primer RP7	CAAGCAGAAGACGGCATACGAGATTTACGCACGTGACTGGAGTTCAGACGTGTGCTCTTCCGATCTAATTGTGGATGAATACTGCCATTTGTCTCGA
NGS Primer RP8	CAAGCAGAAGACGGCATACGAGATTTGAATAGGTGACTGGAGTTCAGACGTGTGCTCTTCCGATCTAATTGTGGATGAATACTGCCATTTGTCTCGA
NGS Primer RP9	CAAGCAGAAGACGGCATACGAGATAACGCATTGTGACTGGAGTTCAGACGTGTGCTCTTCCGATCTAATTGTGGATGAATACTGCCATTTGTCTCGA
NGS Primer RP10	CAAGCAGAAGACGGCATACGAGATCAACTCTCGTGACTGGAGTTCAGACGTGTGCTCTTCCGATCTAATTGTGGATGAATACTGCCATTTGTCTCGA
NGS Primer RP11	CAAGCAGAAGACGGCATACGAGATCTGTAATCGTGACTGGAGTTCAGACGTGTGCTCTTCCGATCTAATTGTGGATGAATACTGCCATTTGTCTCGA
NGS Primer RP12	CAAGCAGAAGACGGCATACGAGATTAAGCACAGTGACTGGAGTTCAGACGTGTGCTCTTCCGATCTAATTGTGGATGAATACTGCCATTTGTCTCGA
NGS Primer RP13	CAAGCAGAAGACGGCATACGAGATTCTCGGTCGTGACTGGAGTTCAGACGTGTGCTCTTCCGATCTAATTGTGGATGAATACTGCCATTTGTCTCGA
NGS Primer RP14	CAAGCAGAAGACGGCATACGAGATATTGTCTGGTGACTGGAGTTCAGACGTGTGCTCTTCCGATCTAATTGTGGATGAATACTGCCATTTGTCTCGA
NGS Primer RP15	CAAGCAGAAGACGGCATACGAGATTGTCGGATGTGACTGGAGTTCAGACGTGTGCTCTTCCGATCTAATTGTGGATGAATACTGCCATTTGTCTCGA
NGS Primer RP16	CAAGCAGAAGACGGCATACGAGATGTATAACAGTGACTGGAGTTCAGACGTGTGCTCTTCCGATCTAATTGTGGATGAATACTGCCATTTGTCTCGA
NGS Primer RP17	CAAGCAGAAGACGGCATACGAGATCCTATGCCGTGACTGGAGTTCAGACGTGTGCTCTTCCGATCTAATTGTGGATGAATACTGCCATTTGTCTCGA
Tat FP	ATCGAATTCCGCCACCATGGAGCCAGTAGATCCTAGACTAGAG
Tat overlap RP	AGGTGGGTTGCTTTGATAGAGAAGCTTGATGAGTC
Tat overlap FP	ATCAAAGCAACCCACCTCCCAATCCCGAGGGGACC
Tat overlap RP	ATAGGTACCCTATTCCTTCGGGCCTGTCGGGTCCCCTCGGGATTGGG
TAT RP	AGTGGTACCCTATTCCTTCGGGCCTGTCGGGTC
Tat FP_Lenti	ATAGAATTCCGCCACCATGGAGCCAGTAGA
Tat RP_Lenti	TCAGTCGACCTATTCCTTCGGGCCTGTCGGGT
mTat C27S RP	TTTTTGCTATAGCAATTGGTACAAGCAGTT
mTAt C27S FP SetII	TTGCTATAGCAAAAAGTGTTGCTTTCATTGCCAA
LentiTat FP1	TATGTCCACTTCAGGACAGCACTAGTGGACCTA
LentiTatRP1	AGGGCTAACGCCCGCCCCACGACCCGCAG
LentiTatFP2	GCGGGCGTTAGCCCTCCCACACATAACCAGA
LentiTatRP2	AAGCTTACCATGGCCAAGCCTTTGTCTCAAGA
LentiFP3	TTGGCCATGGTAAGCTTCAGCTGCTCGAGA
LentiRP3	ATAGAATTCGGGTAGGGGAGGCGCTTTTCCCAA
LTR-FP	TTCCGGCGATCGCTGGAAGGGCTAATTTGGTCCCAAA
GFP RP	TCTGGCGCGCCTTACTTGTACAGCTCGTCCA
LTR FP Not I	TATGCGGCCGCTGGAAGGGCTAATTTGGTCCCA
LTR RP	GCTCACCATGGTGGCGATGCTAGAGATTTTCCACAC
GFP FP	TCTAGCATCGCCACCATGGTGAGCAAGGGC
GFP RP MluI	ATAACGCGTTTACTTGTACAGCTCGTCCATGC
Tat clone confirmation FP	CGCAAATGGGCGGTAGGCGTG
Tat clone confirmation RP	CAGATCTCCTCGGTACCGGATCCA
