# Supplementary material for: GigaAssay – a high-throughput assay system for molecular functions and cell processes
Source: Research Square preprint supplement (doi:10.21203/rs.3.rs-708936/v1), 2021-07-12
Supplement: Supplementary file 1 [file d8d93507f21afad6c921cf53.pdf]

Bright Field

GFP

Empty vector

A

wtTat

B

Tat-C27S

C

D

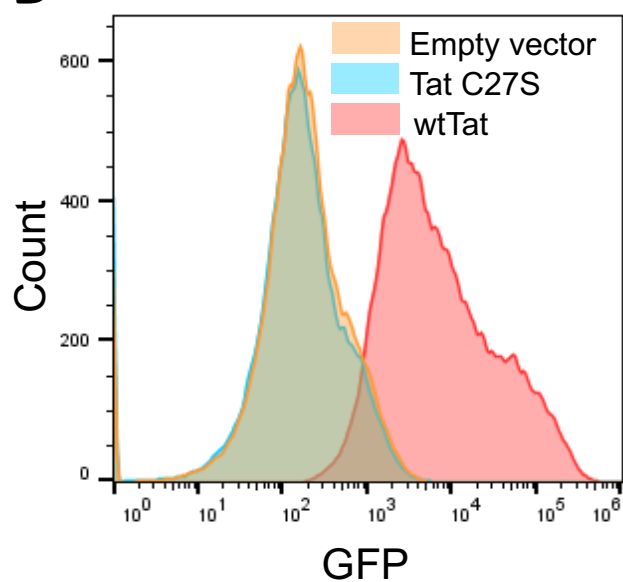

E

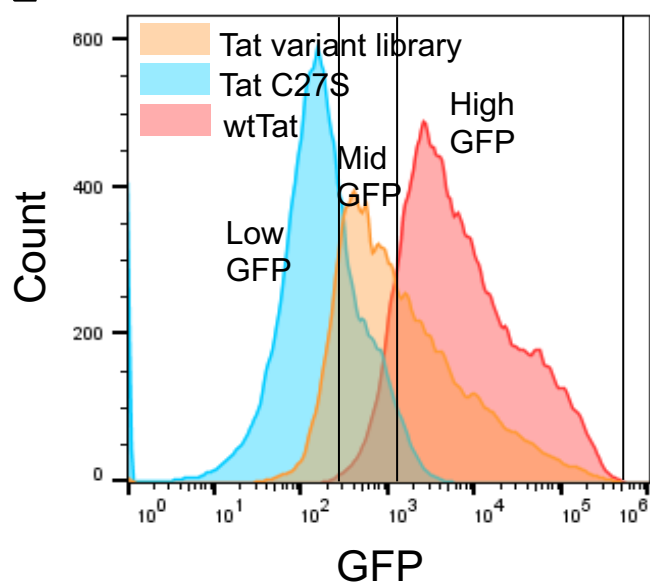

**Supplementary Figure S1. Verification of GigaAssay. A-C.** Epifluorescence images of controls setting up the GigaAssay in LentiX293T/LTR-GFP cells using lentiviral infection for delivery. The scale bar is 100  $\mu$ m. **D. E** Flow cytometry optimization for Tat transactivation of LTR-GFP and flow cytometry sorting of the *Tat* variant library in Jurkat/LTR-GFP cells. Keys are shown.

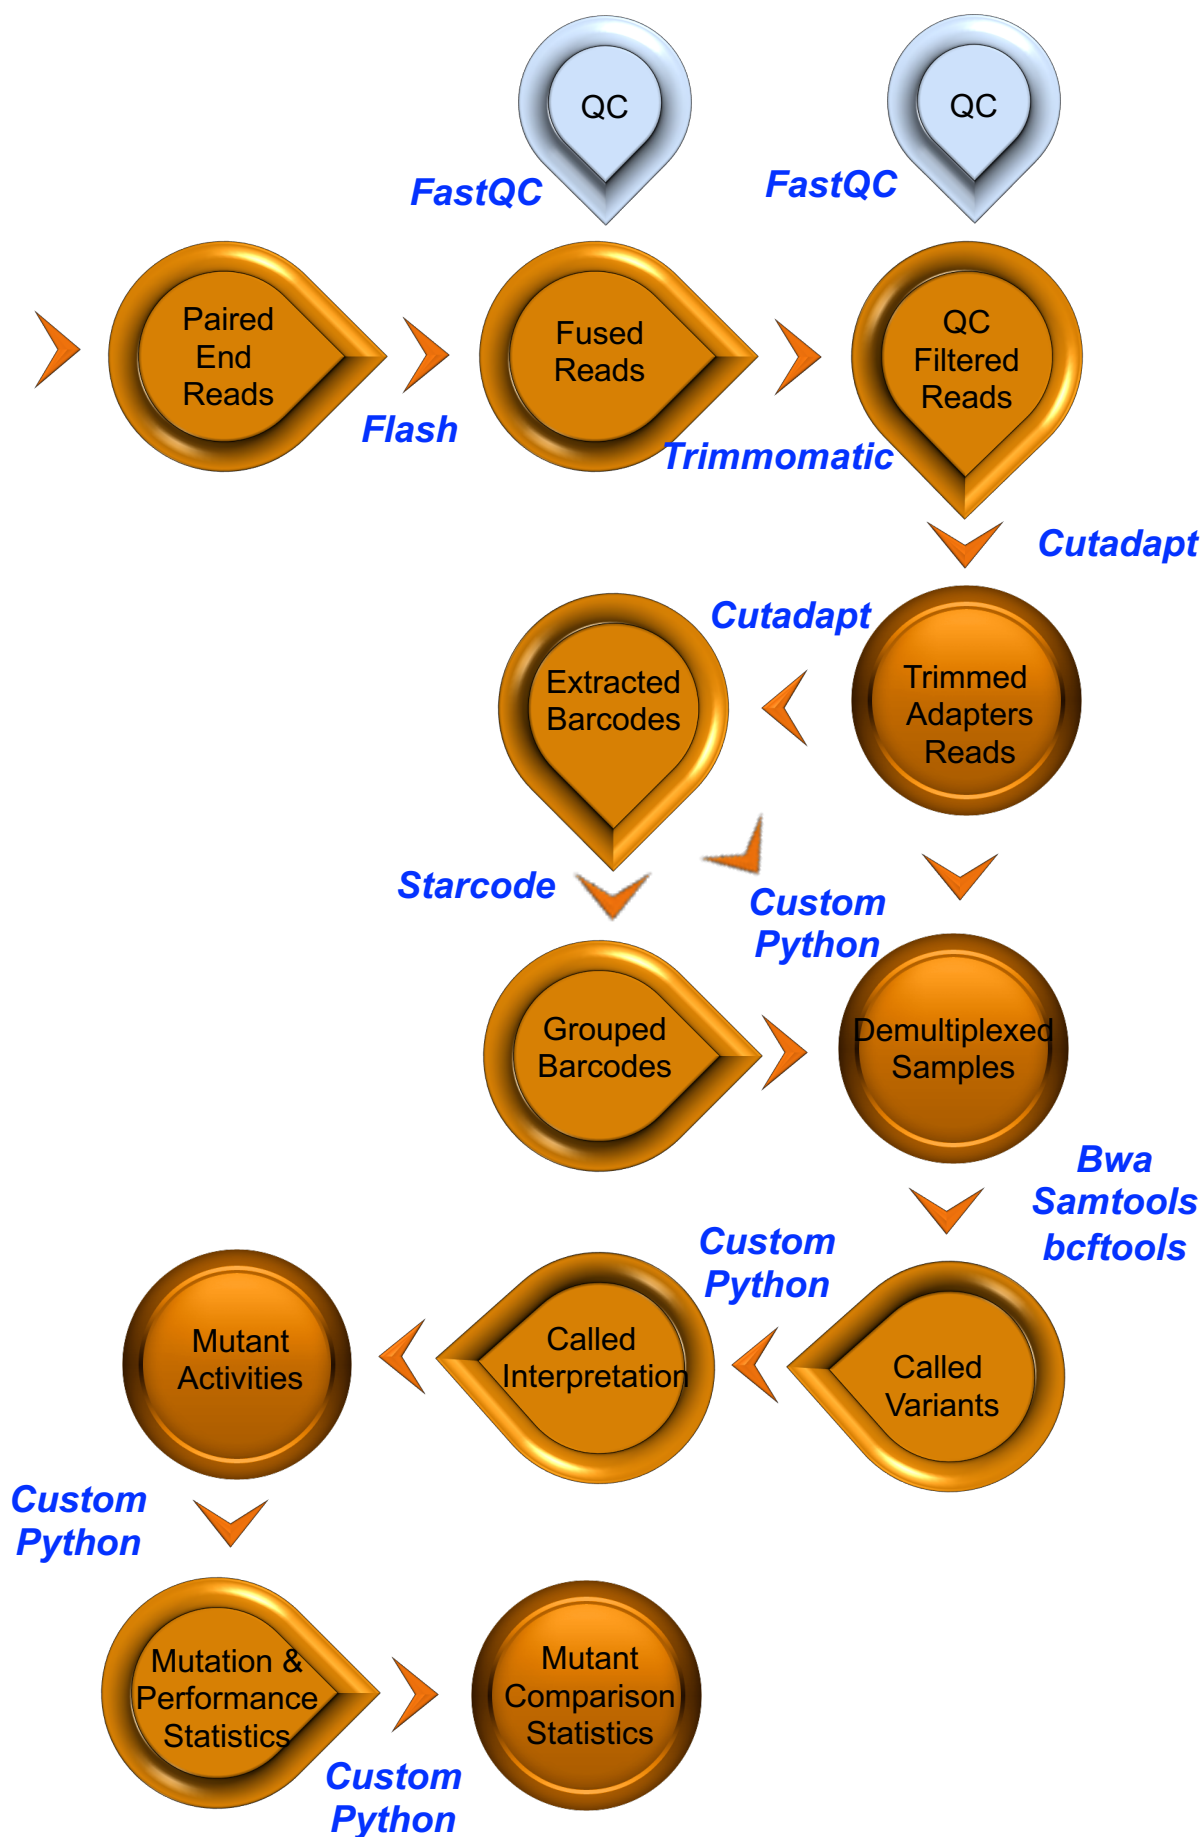

**Supplementary Figure S2. Flowchart of GigaAssay bioinformatics pipeline.** Programs are indicated in blue italic font.

**A**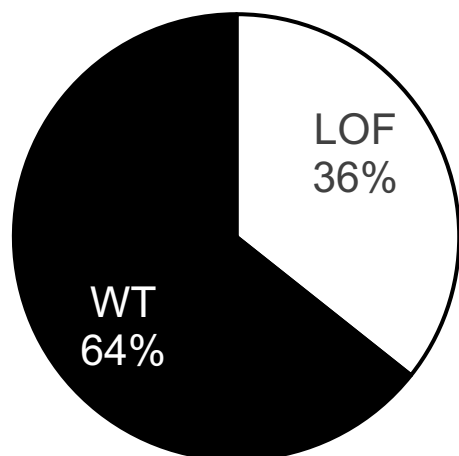**B**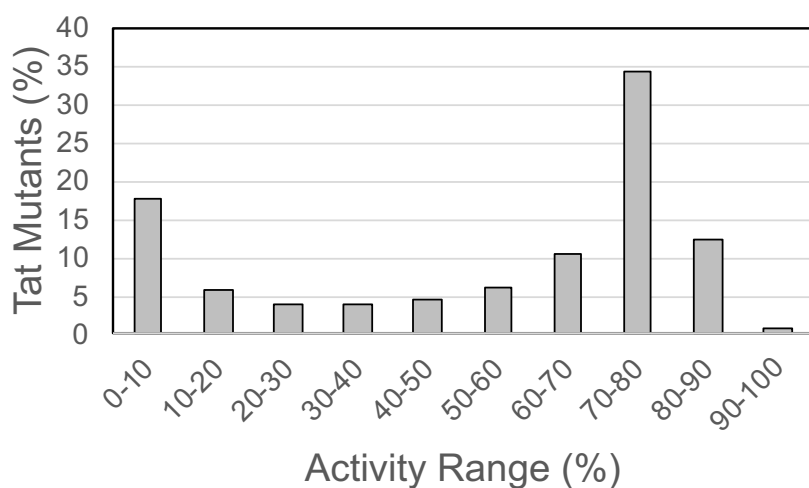**C**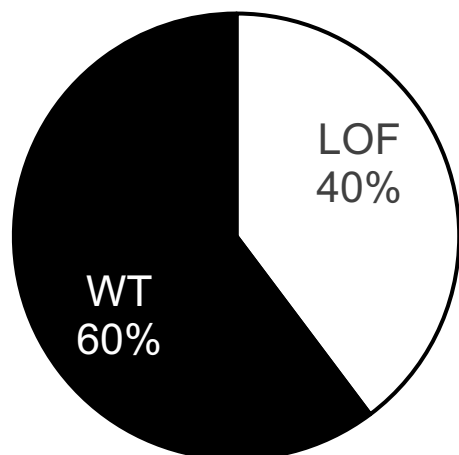**D**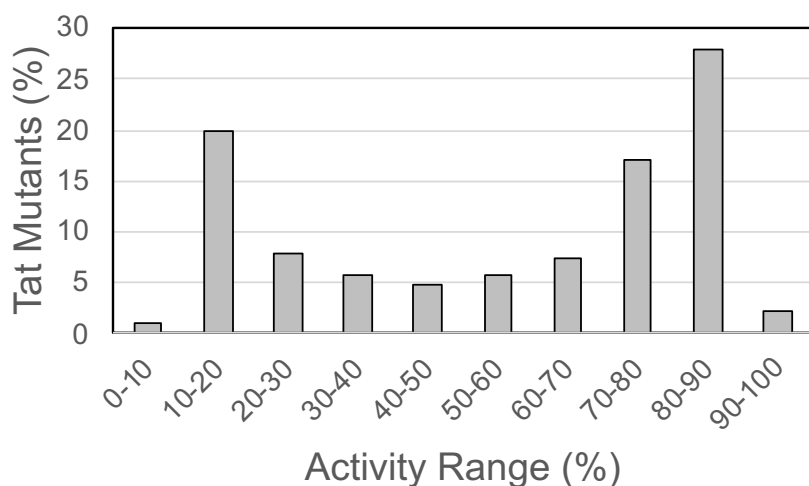

**Supplementary Figure S3. Activity summary of Tat mutants.** **A, B.** Tat mutant activity distribution in LentiX293T/LTR-GFP cells (**A**, **B**) on a pie graph (**A**) and bin plot (**B**). **C, D.** Tat mutant activity distribution in Jurkat/LTR-GFP cells on a pie graph (**C**) and bin plot (**D**).

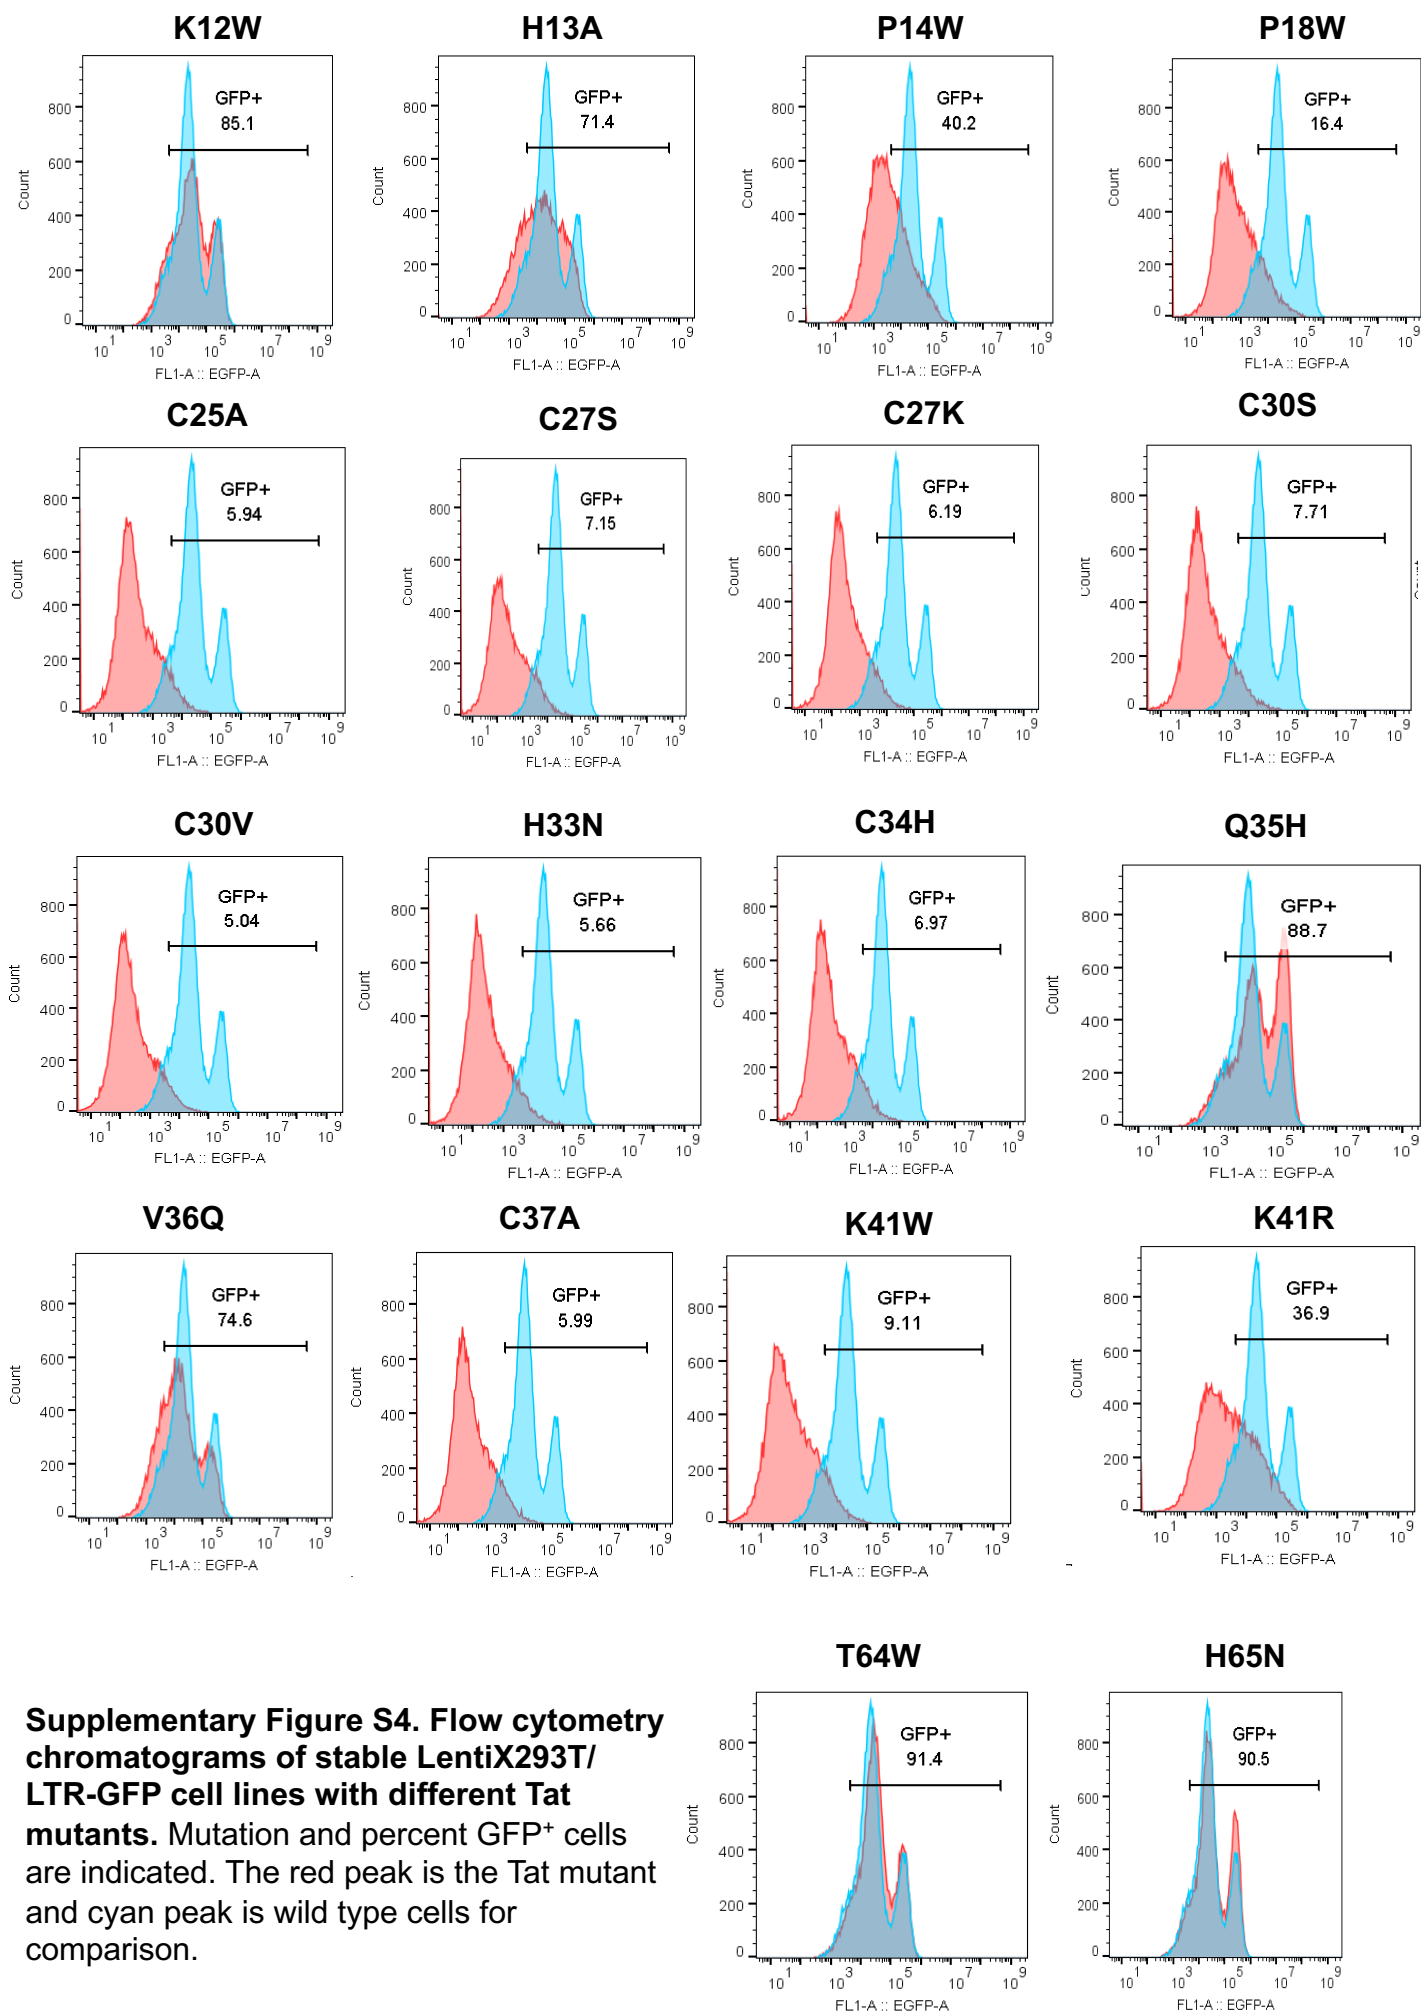



**A**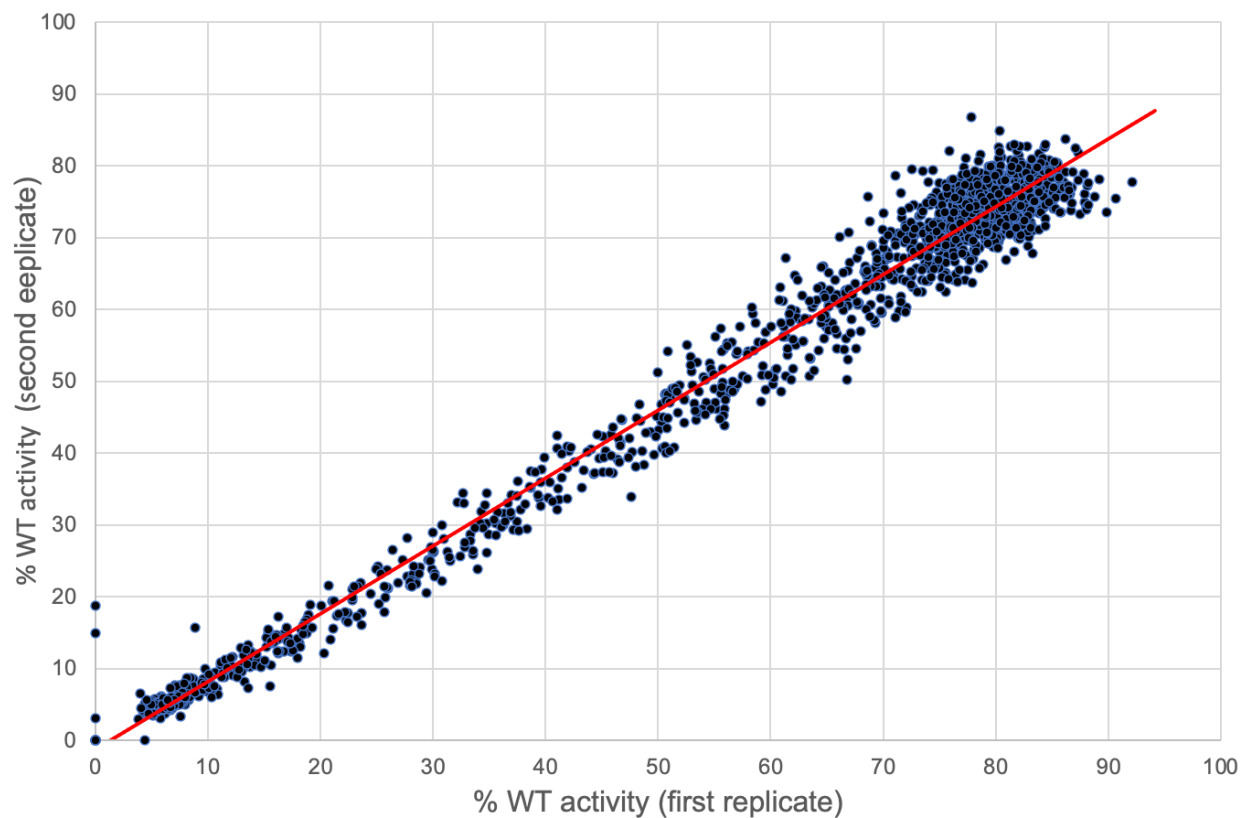**B**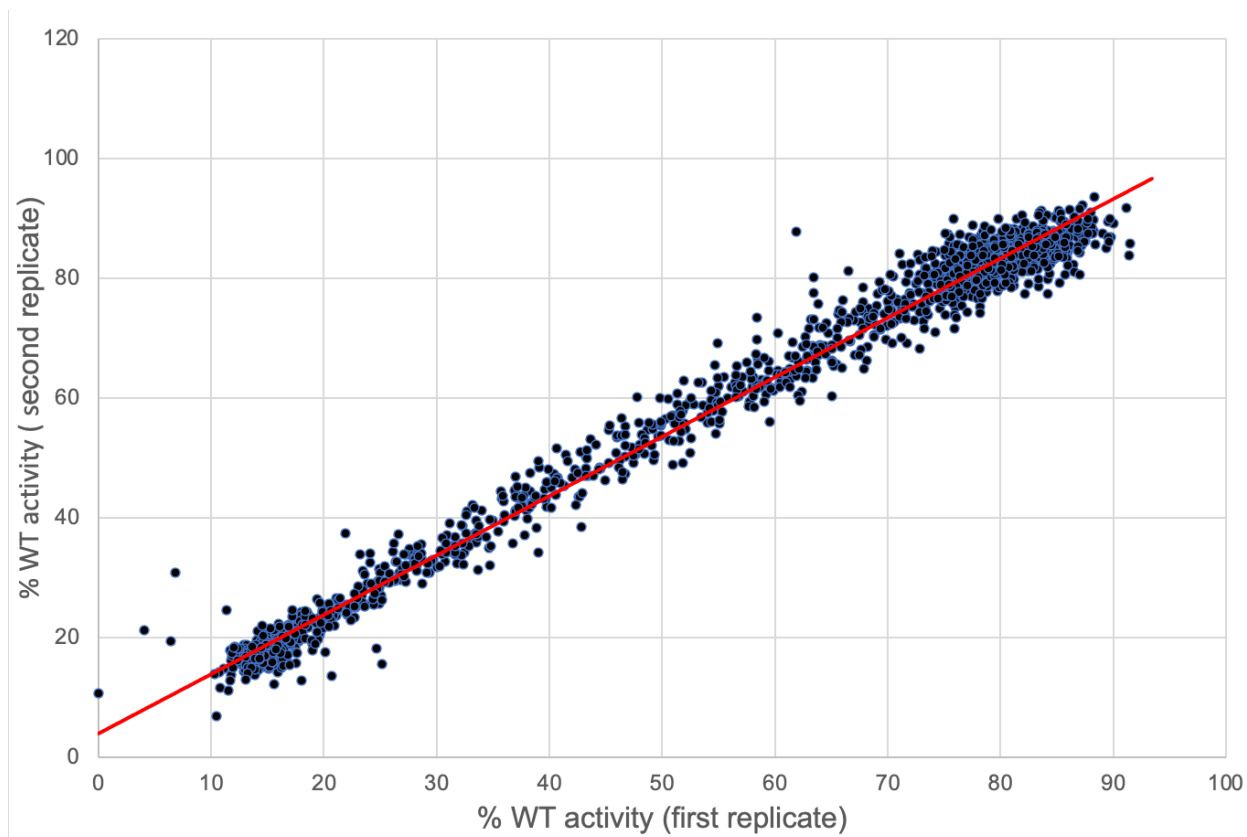

**Supplementary Figure S5. Scatter plots for replicates. A,B.** Transcriptional activity [GFP<sup>+</sup>/(GFP<sup>-</sup> + GFP<sup>+</sup>)] correlation among replicate GigaAssays in LentiX293T/LTR-GFP (**A**,  $R^2 = 0.99$ ) and Jurkat (**B**,  $R^2 = 0.99$ ) cells.

# B

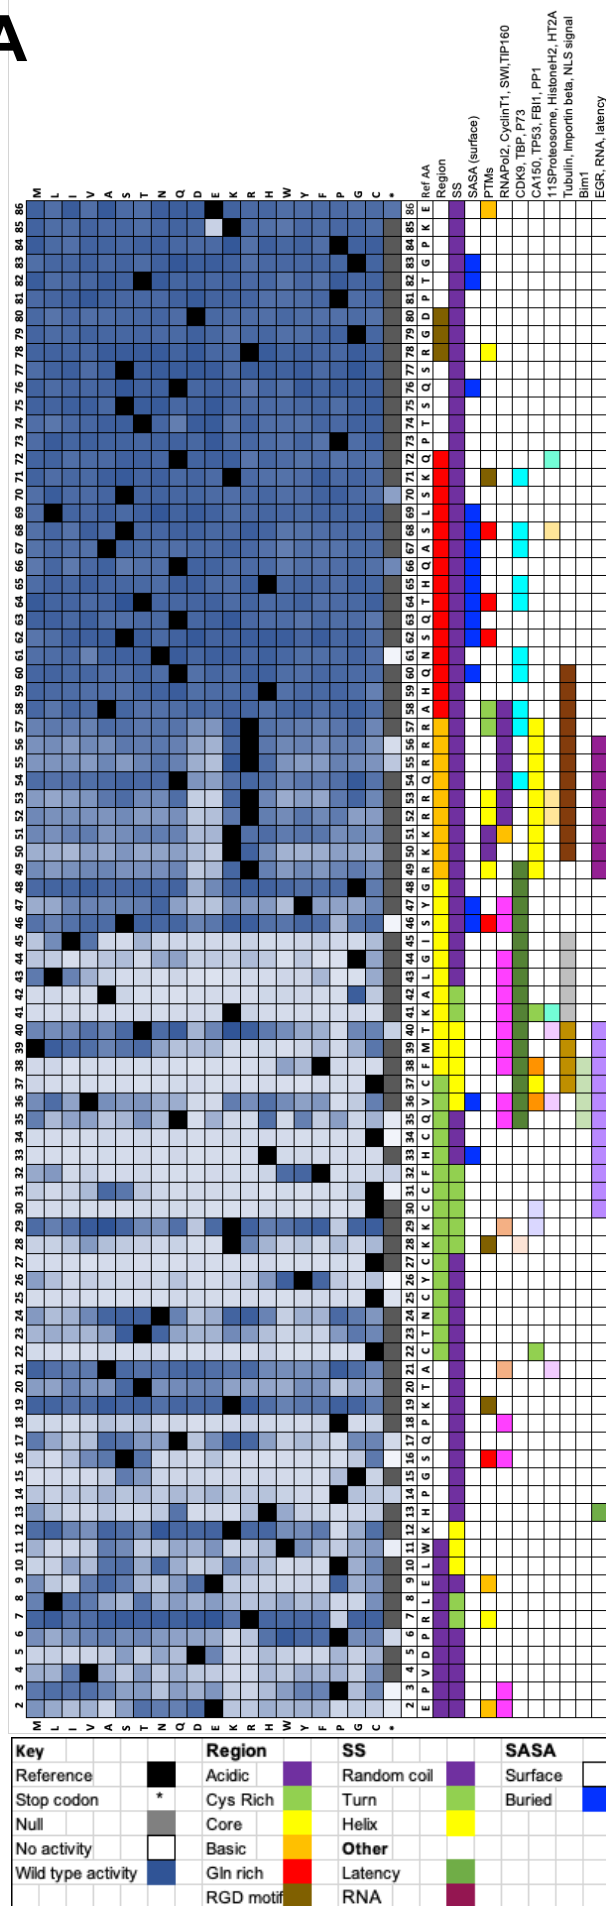

# B

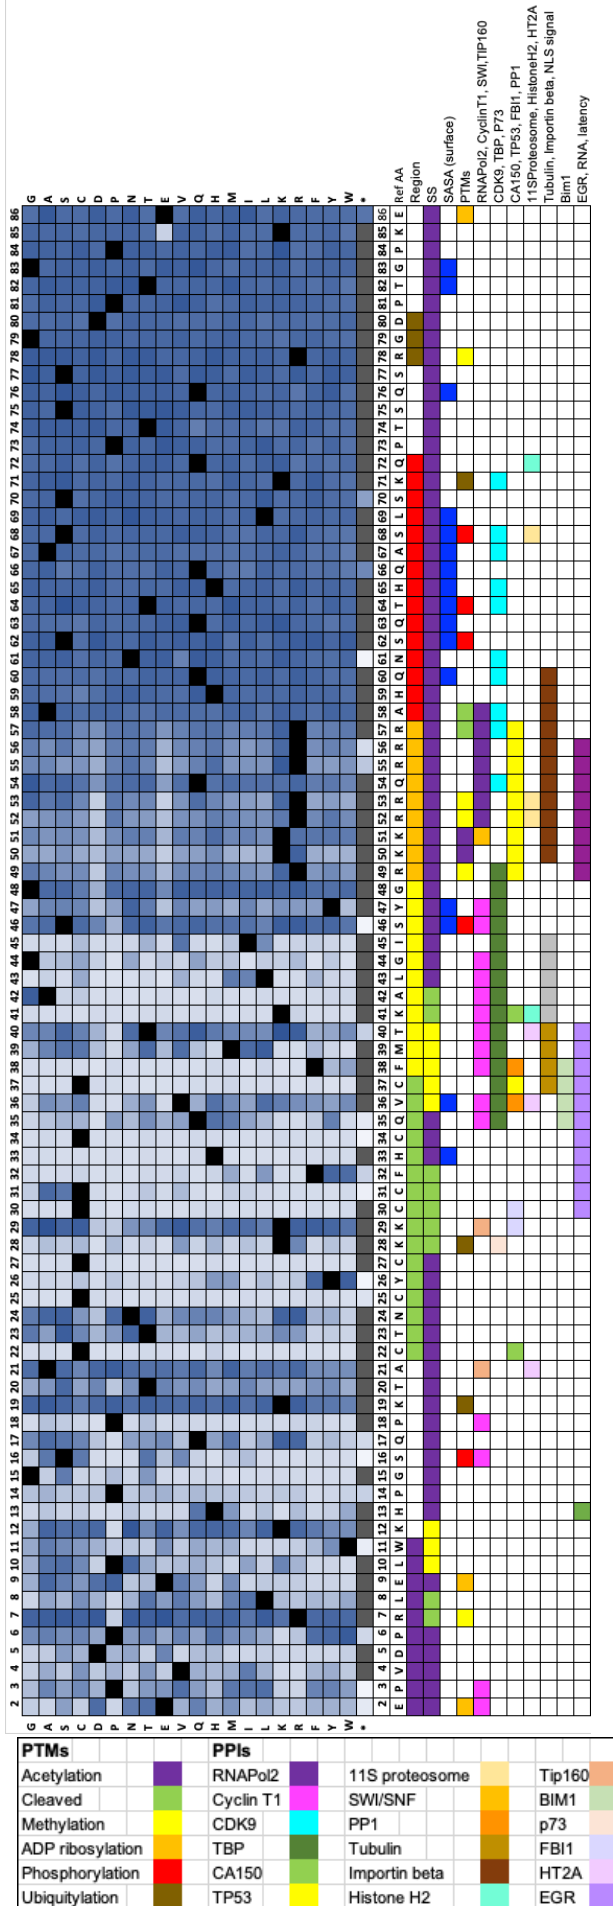

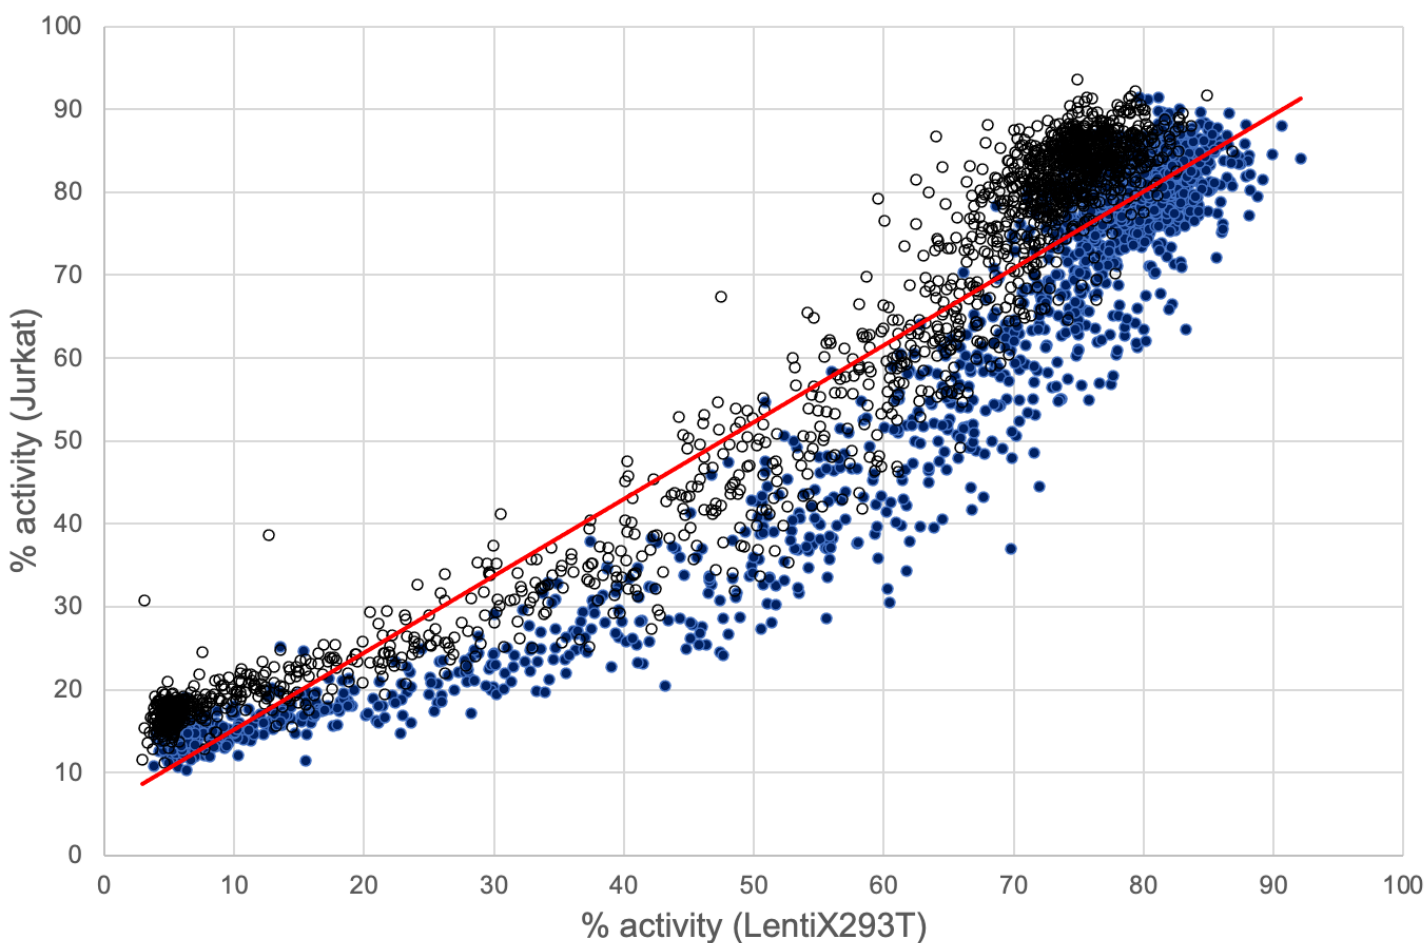

**Supplementary Figure S7. Scatter plots comparing transcription activities for LentiX293T/LTR-GFP and Jurkat/LTR-GFP cells.** Comparison of activities (percentage of reads for  $\text{GFP}^+ / (\text{GFP}^- + \text{GFP}^+)$ ) for matched mutants in LentiX293T/LTR-GFP (open circles) and Jurkat/LTR-GFP cells (blue filled circles);  $R^2 = 0.93$ .

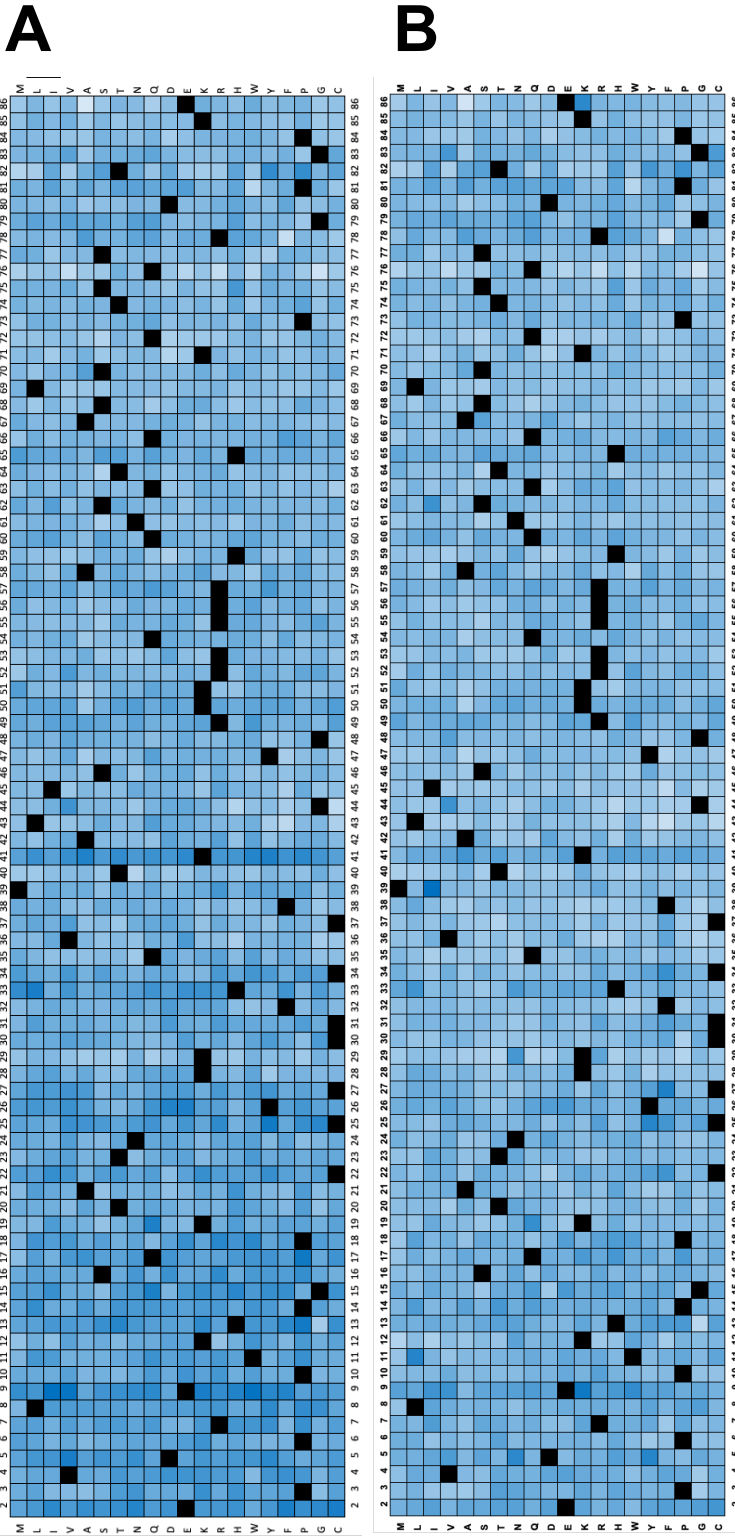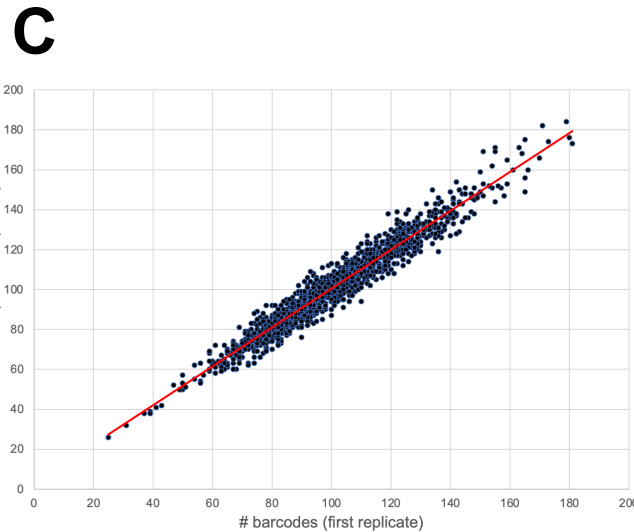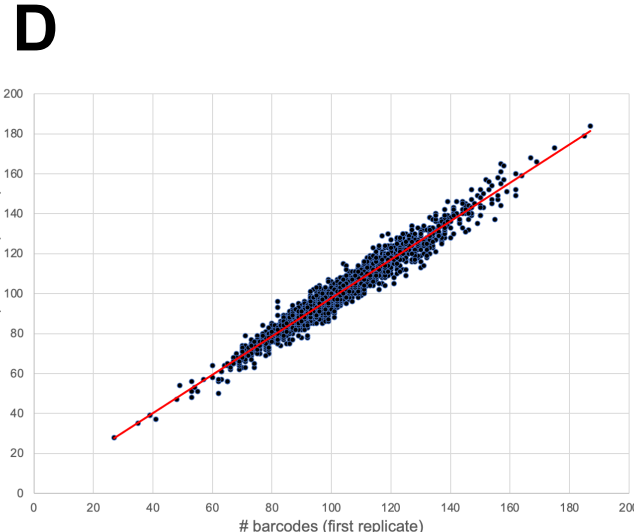

**Supplementary Figure S8. Quantitation of GigaAssay barcodes.** **A, B.** Heatmap of barcodes for Tat mutants in LentiX293T/LTR-GFP and Jurkat /LTR-GFP cells respectively. A key for the heatmap colors is shown. Black cells indicate the reference sequence. **C,D.** Barcode correlation for replicate GigaAssay samples. Each point on the scatter plot is for matched mutants. Barcode correlation for replicate GigaAssays in LentiX293T/LTR-GFP (**C**,  $R^2 = 0.95$ ) and Jurkat/LTR-GFP (**D**,  $R^2 = 0.96$ ) cells.

A

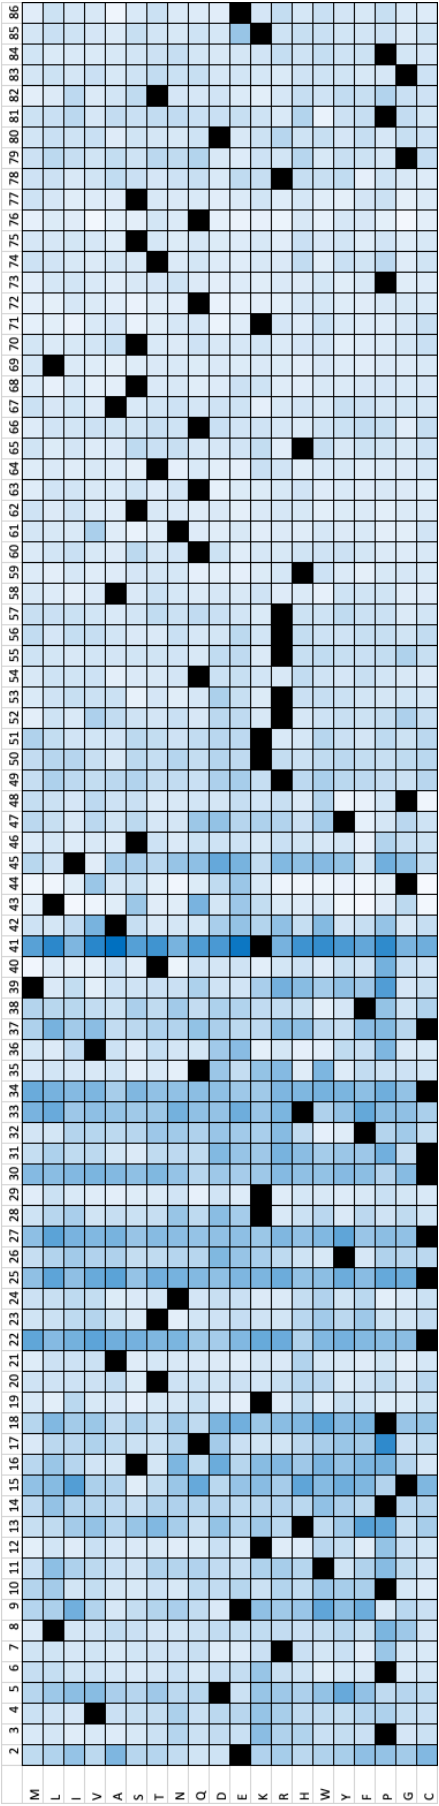

B

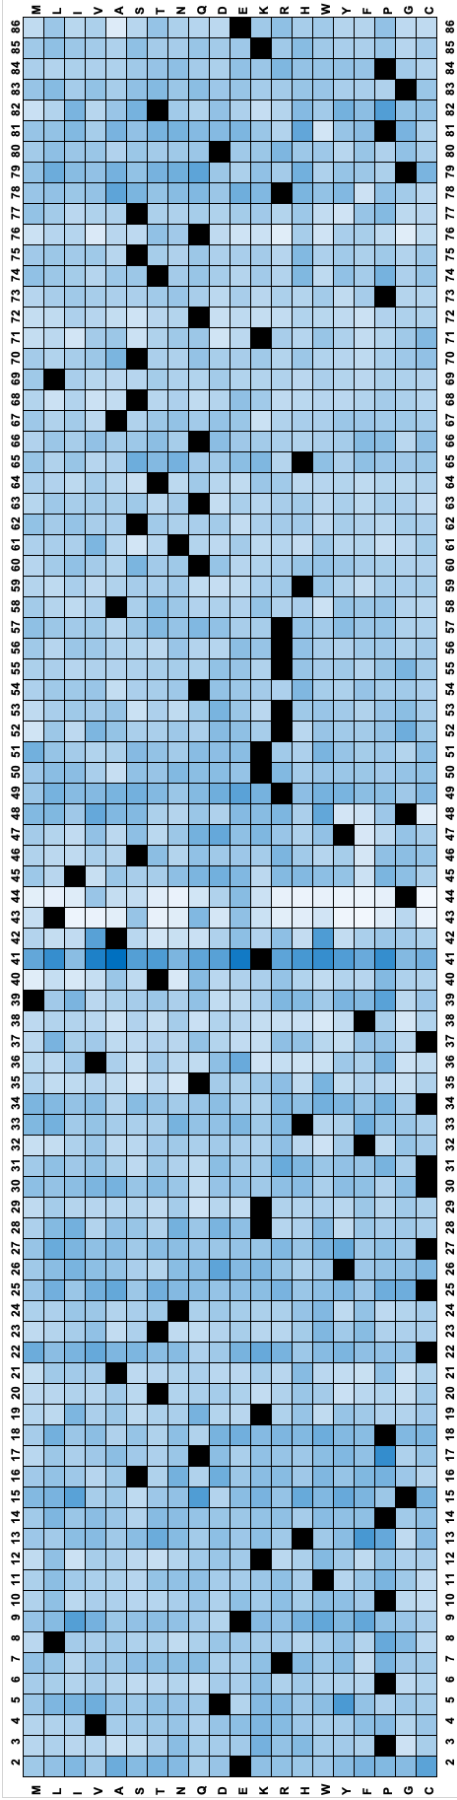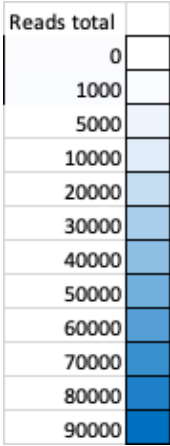

**Supplementary Figure S9. Heatmaps of sequence reads.** Sequence reads for Tat mutants in LentiX293T/LTR-GFP (A) and Jurkat/LTR-GFP (B) cells are shown. A key for the heatmap colors is shown. Black squares indicate the reference sequence.

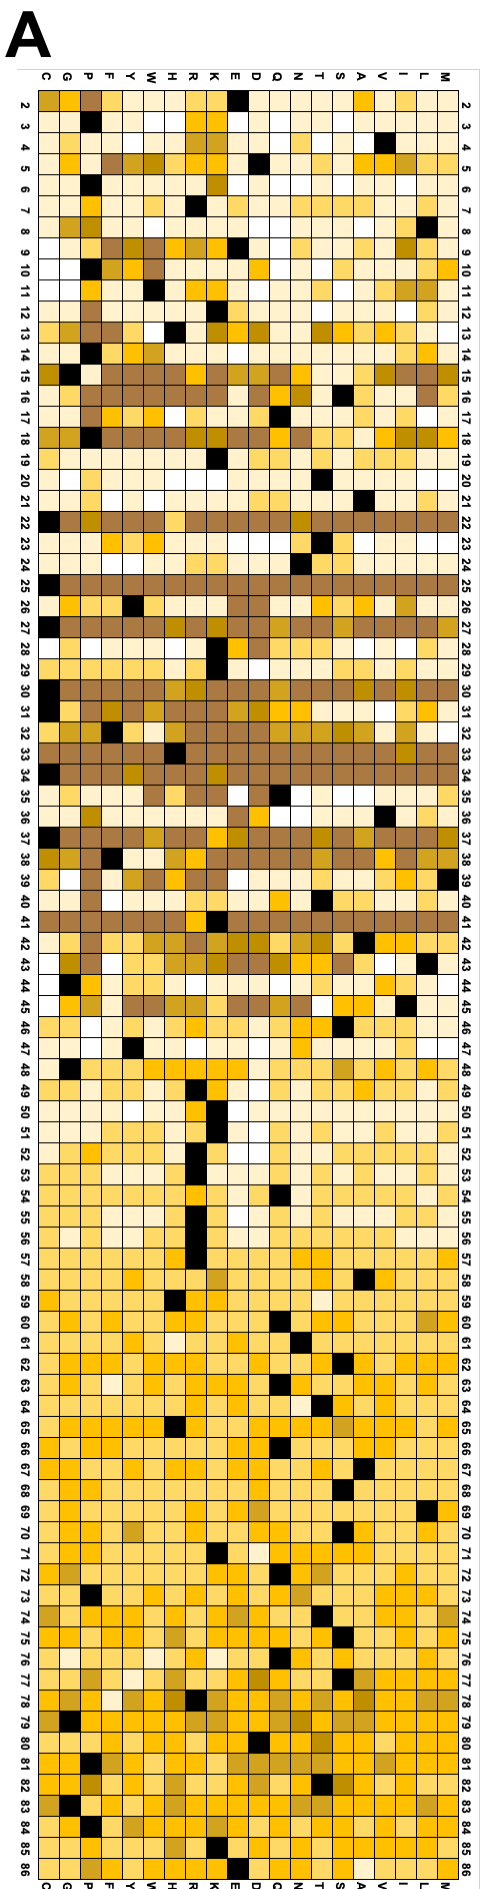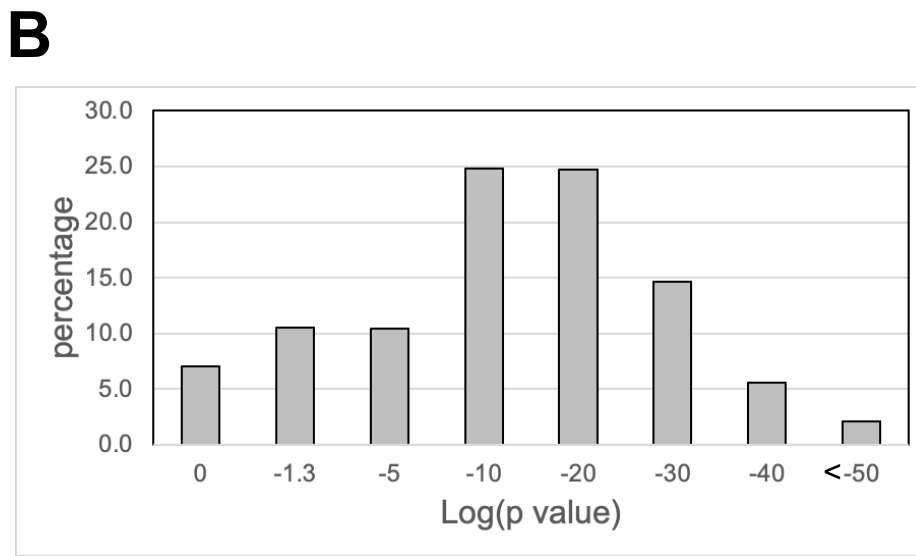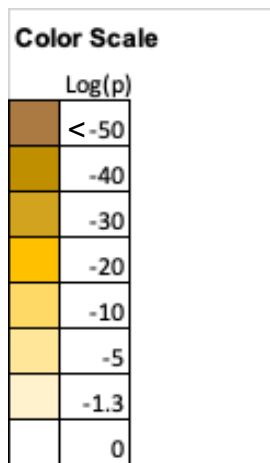

**Supplementary Figure S10. Statistical significance of activities of Tat mutants in LentiX293T/LTR-GFP cells.** The hypothesis tested is whether the GFP+ ratio observed for that mutant is equal to 0.5. **A.** Heatmap of  $-\text{Log}(p \text{ values})$  for Tat mutants transcriptional activities in LentiX293T/LTR-GFP cells. **B.** Bin plot showing distribution of  $-\text{Log}(p \text{ values})$ ; ( $n = 1,615$ ).



**A**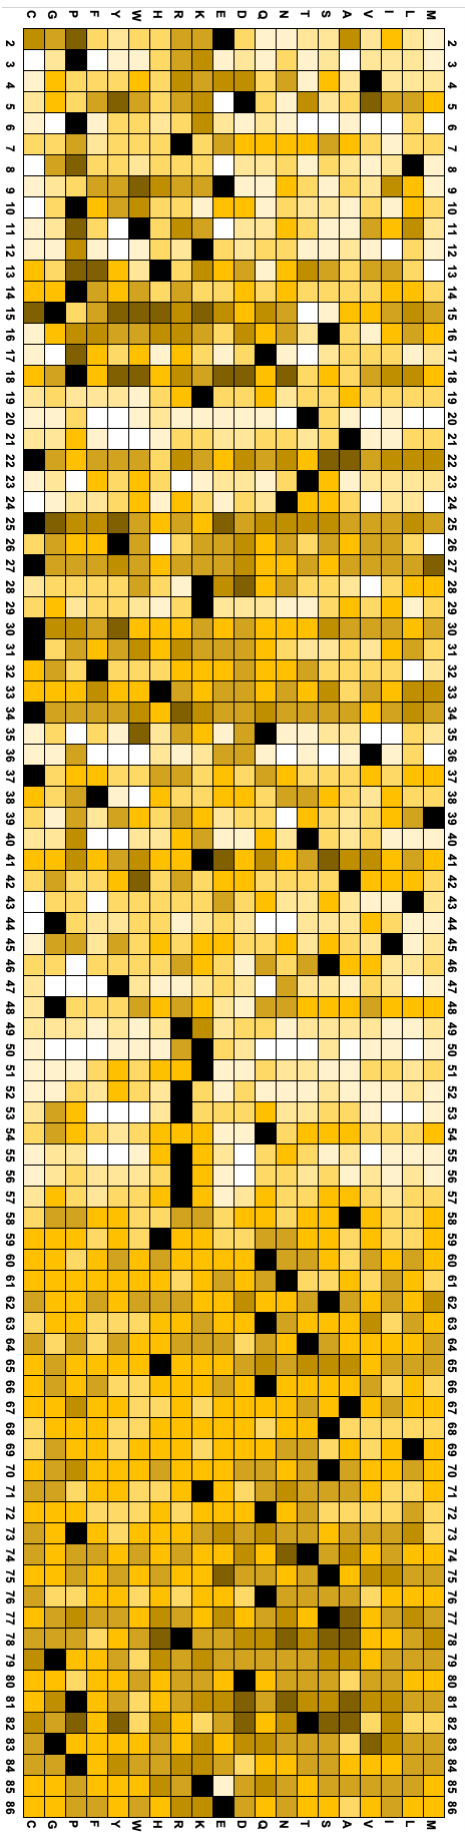**B**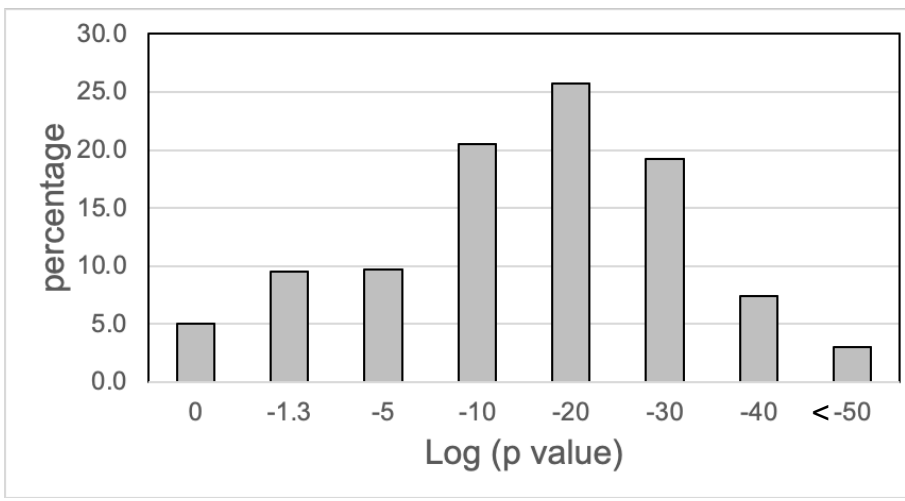**Color Scale**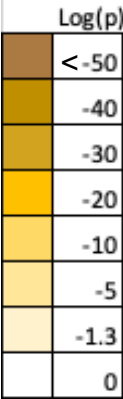

**Supplementary Figure S11. Statistical significance of activities of Tat mutants in Jurkat/LTR-GFP cells.** The hypothesis tested is whether the GFP+ ratio observed for that mutant is equal to 0.5. **A.** Heatmap of  $-\log(p)$  values for Tat mutants transcriptional activities in Jurkat/LTR-GFP cells. **B.** Bin plot showing distribution of  $-\log(p)$  values; (n = 1,615).

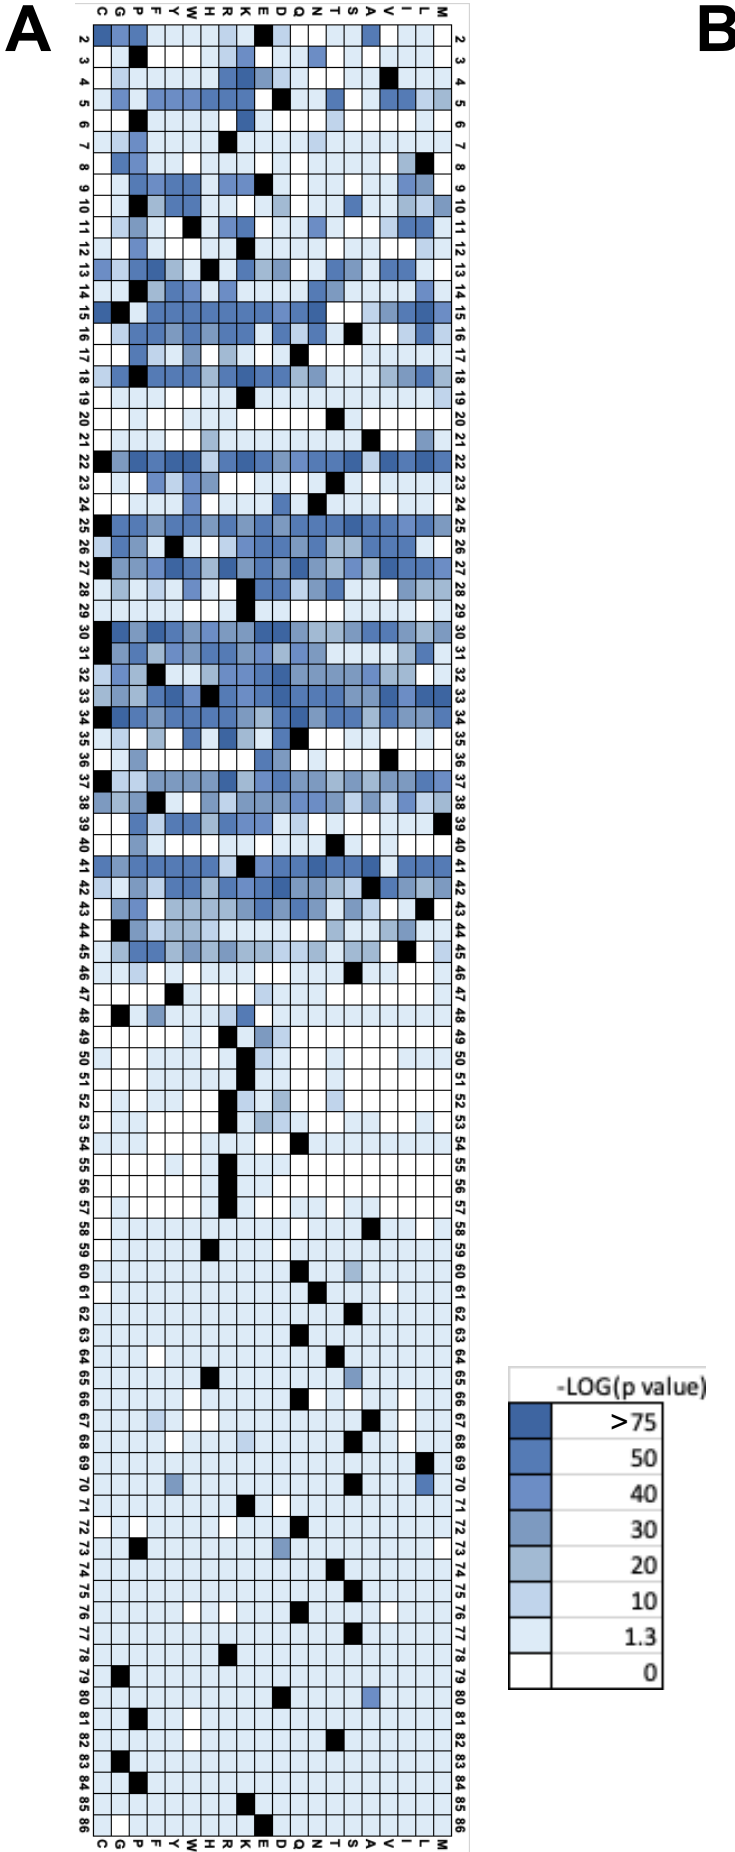

**Supplementary Figure S12. Statistical significance of the effect of Tat mutants on Tat activity in LentiX293T/LTR-GFP cells.** The hypothesis tested is whether the genotype (Variant/WT) has an effect on the percentage of GFP<sup>+</sup> cells. Heatmaps of **A.**  $-\text{Log}(p \text{ values})$  and **B.**  $-\text{Log}(q \text{ values})$  for the LRT test on the significance of the genotype variable in LentiX293T/LTR-GFP cells.

A

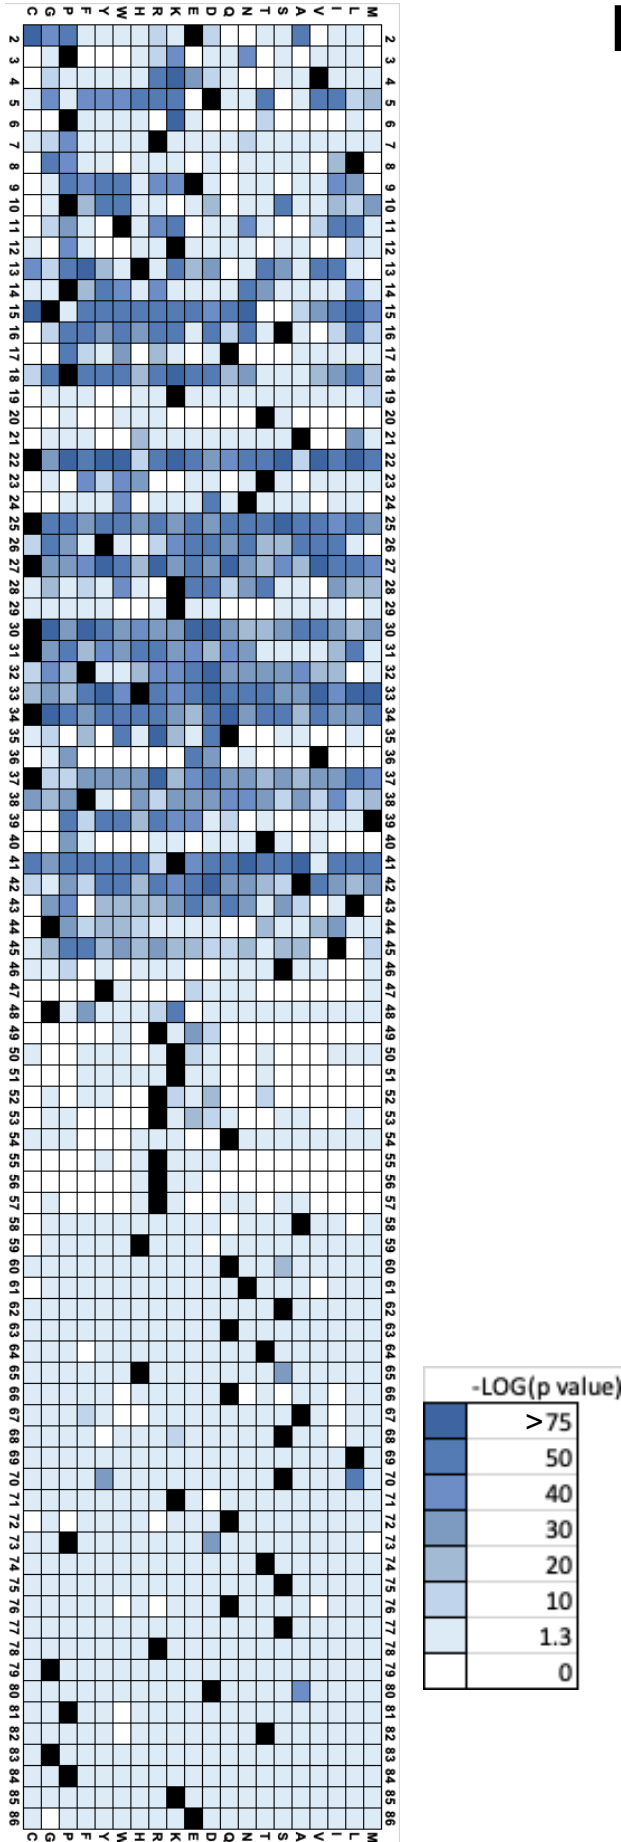

B

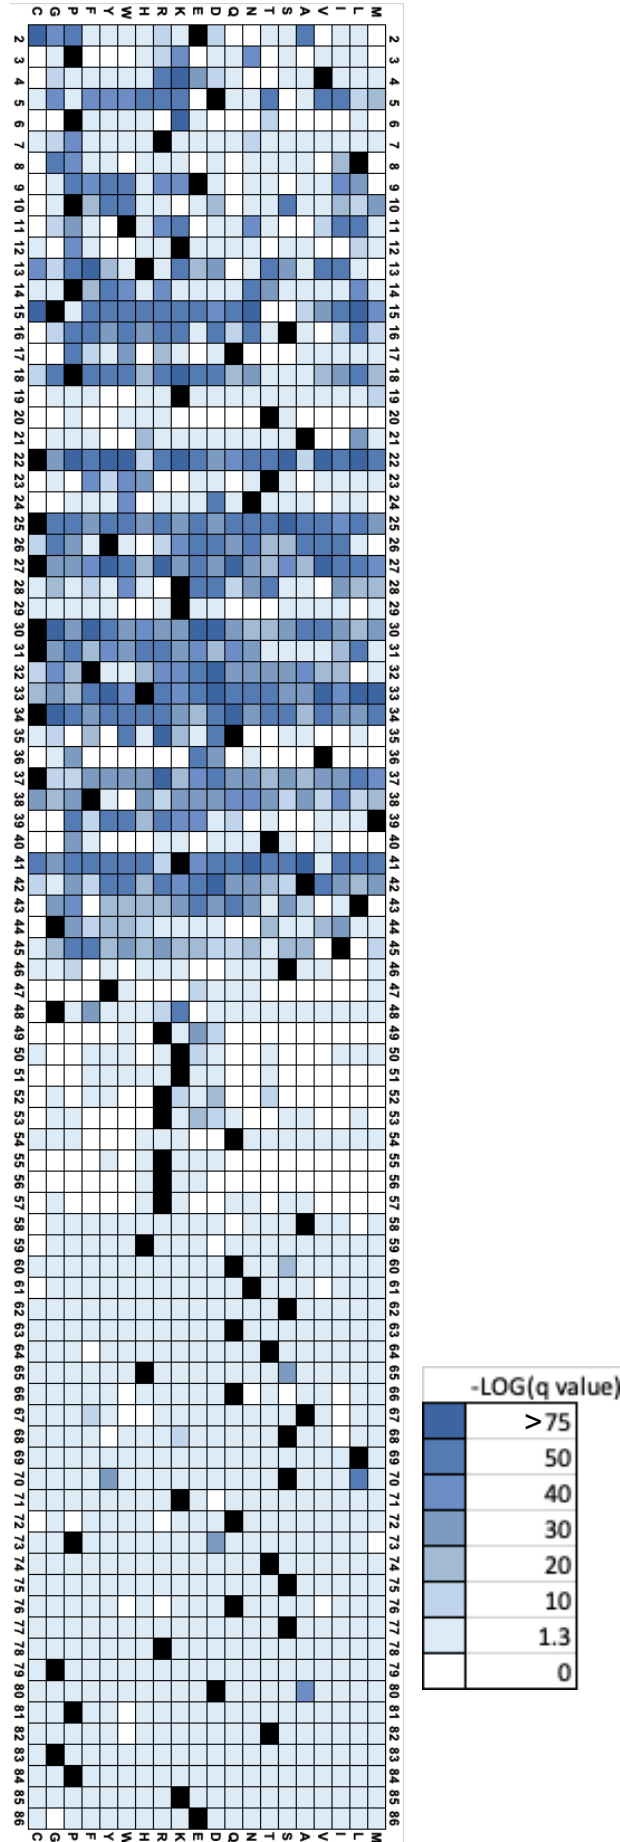

**Supplementary Figure S13. Statistical significance of the effect of Tat mutants on Tat activity in Jurkat/LTR-GFP cells.** The hypothesis tested is whether the genotype (Variant/WT) has an effect on the percentage of GFP<sup>+</sup> cells. Heatmaps of **A.**  $-\text{Log}(p \text{ values})$  and **B.**  $-\text{Log}(q \text{ values})$  for the LRT test on the significance of the the genotype variable in Jurkat/LTR-GFP cells.

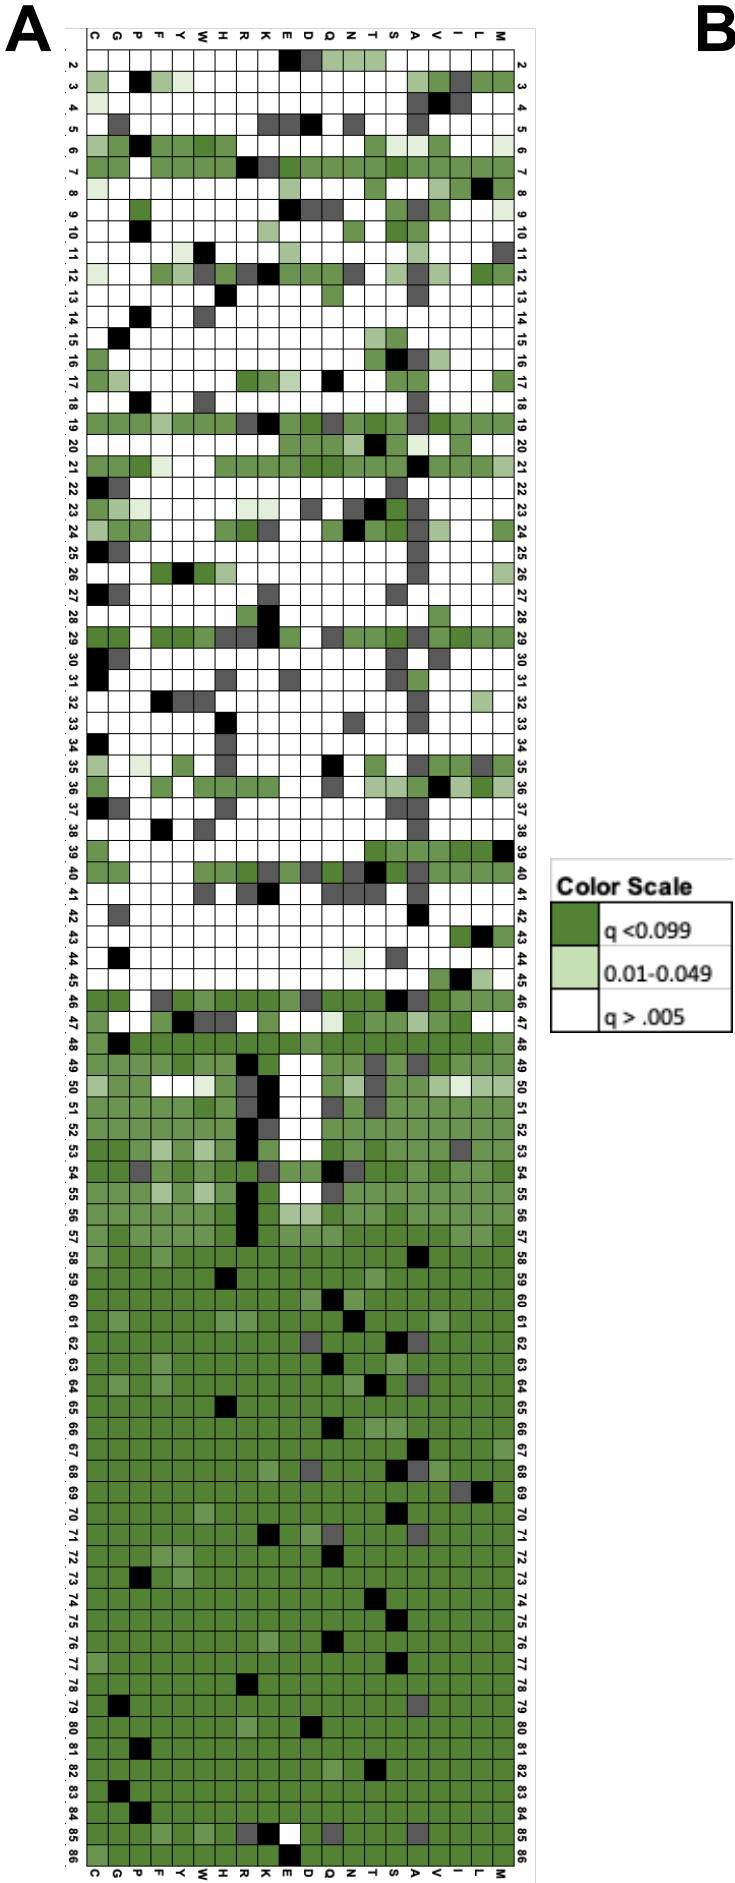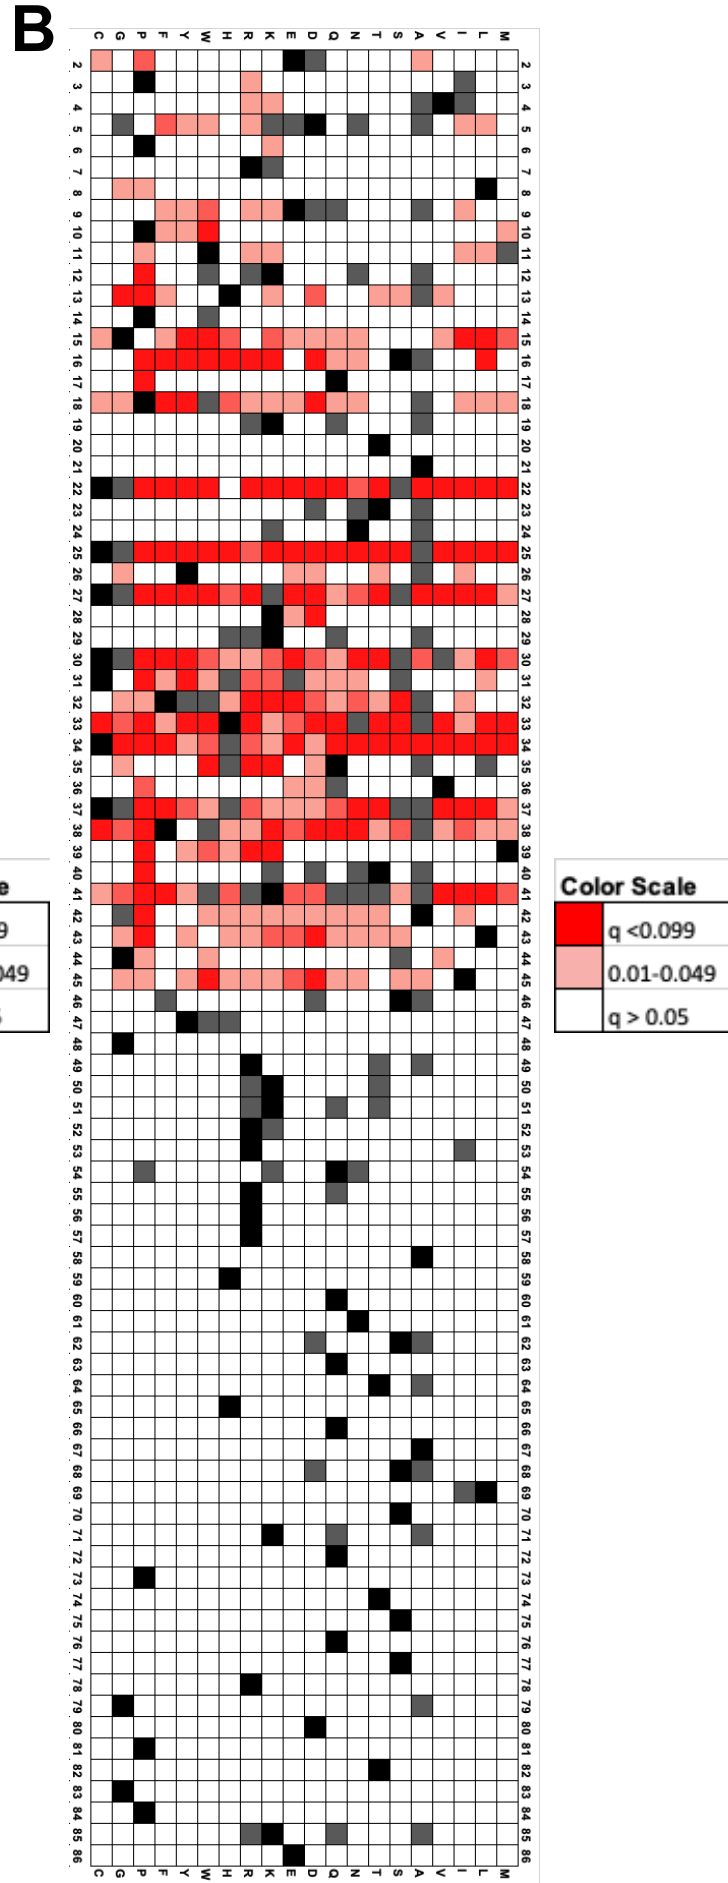

**Supplementary Figure S14. Heatmaps of p values Tat mutants transcriptional activities in LentiX293T/LTR-GFP cells.** p values for comparison of Tat mutant activity to sets of mutants with wild type (**A**) and LOF activity (**B**). Keys for p value colors are shown.

**A**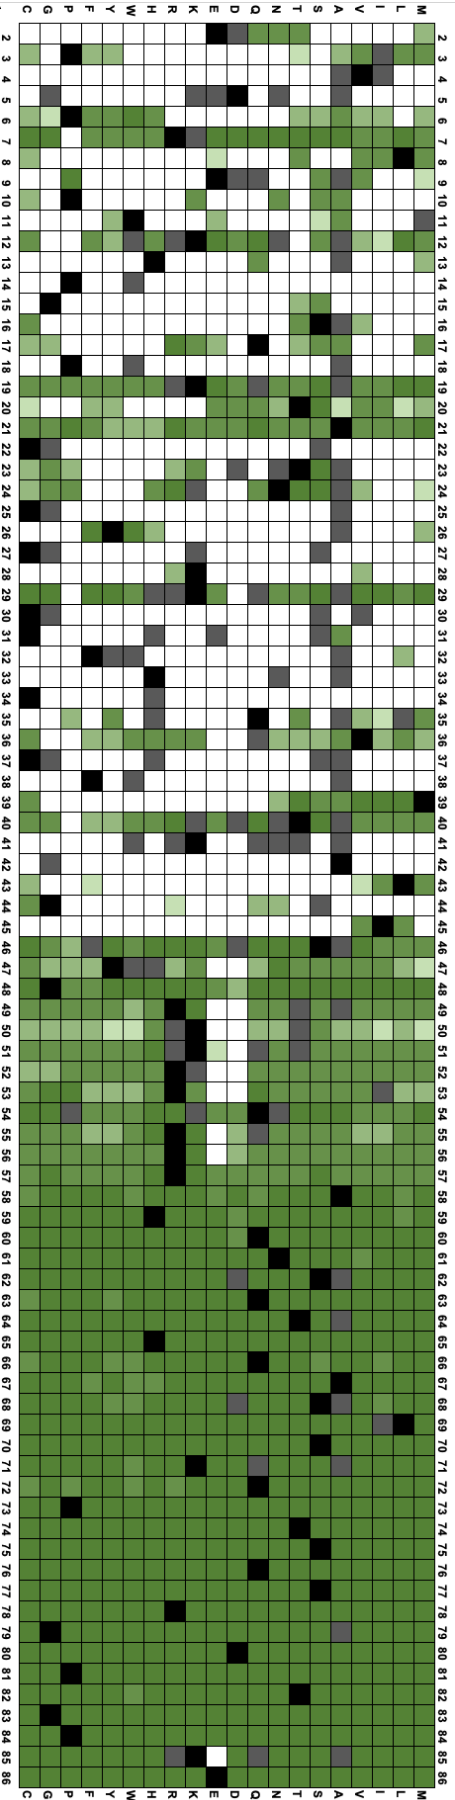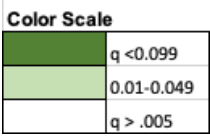**B**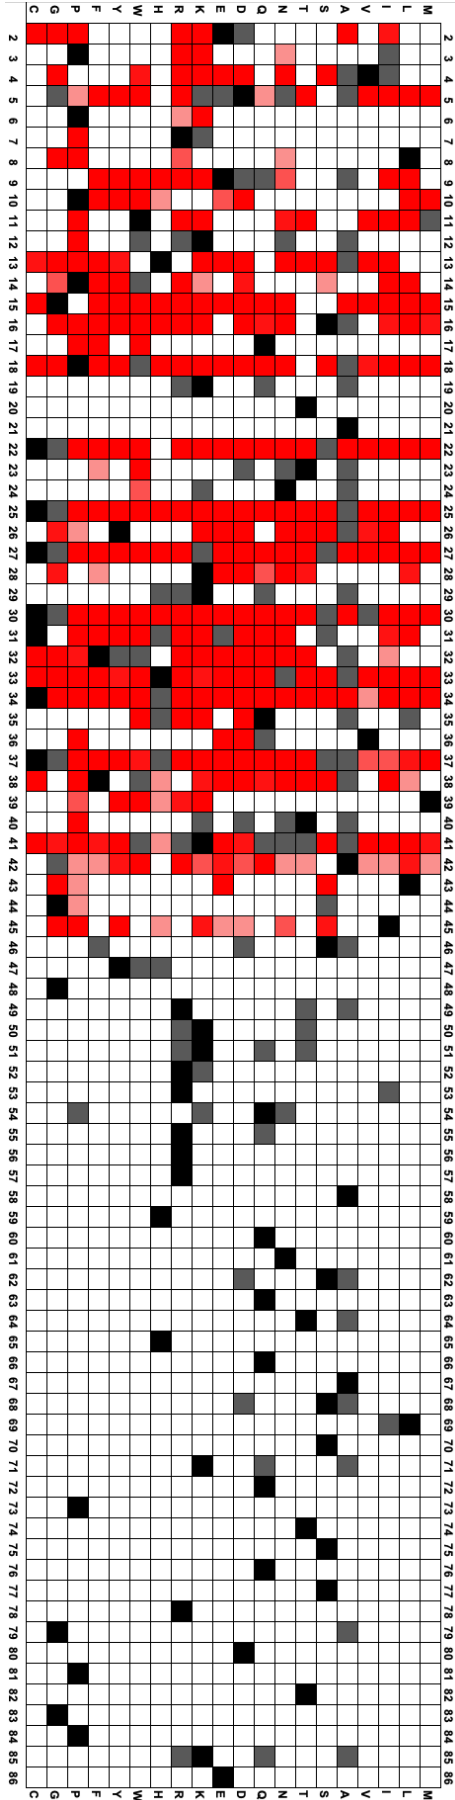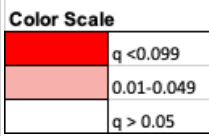

**Supplementary Figure S15. Heatmaps of p values Tat mutants transcriptional activities in Jurkat/LTR-GFP cells. p values for comparison of Tat mutant activity to sets mutants with wild type (A) and LOF activity (B). Keys for p value colors are shown.**

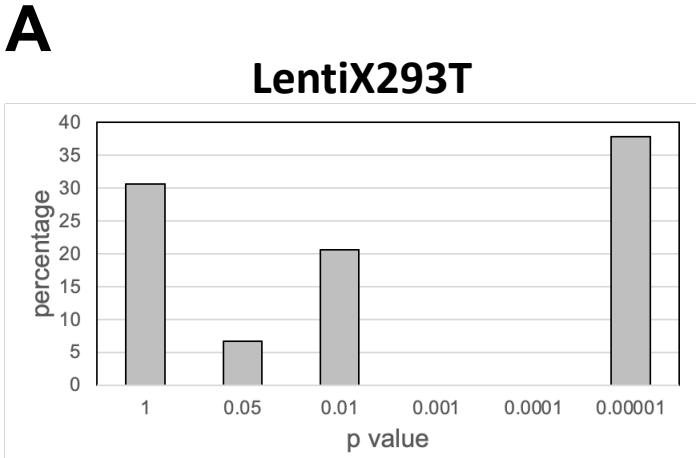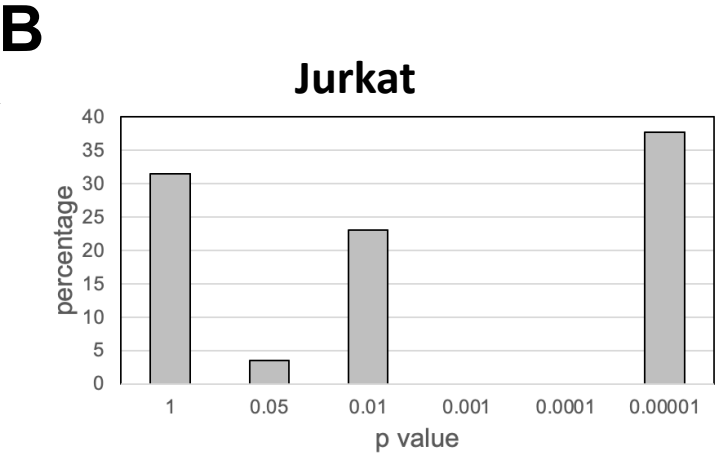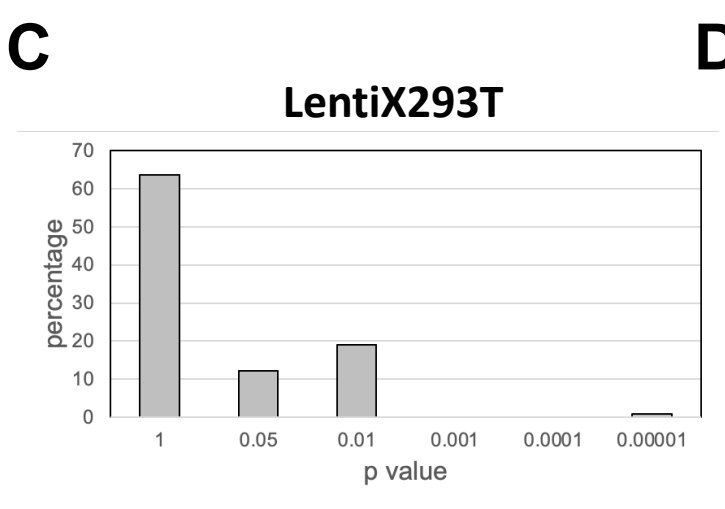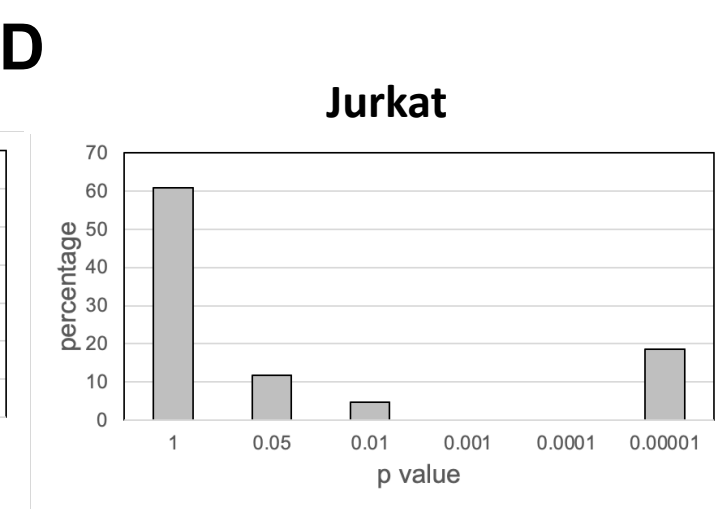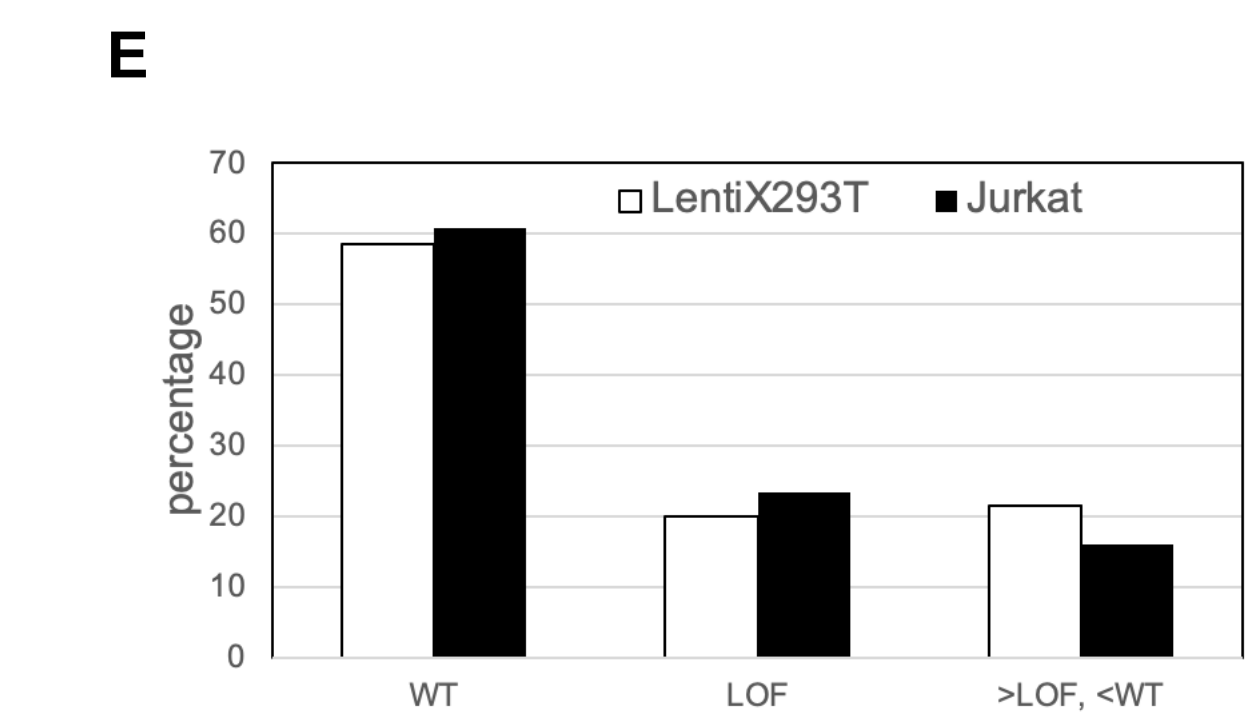

**Supplementary Figure S16. Bar charts of p values for Tat mutant transcriptional activities compared to wild type Tat and LOF Tat mutants.** p values for comparison of Tat mutant activity to sets of mutants with wild type activity (A,B) and LOF activity (C,D) for LentiX293T/LTR-GFP (A,C) and Jurkat/LTR-GFP (B,D) cells. WT and LOF percentages are statistically significance ( $p < 0.05$ ).



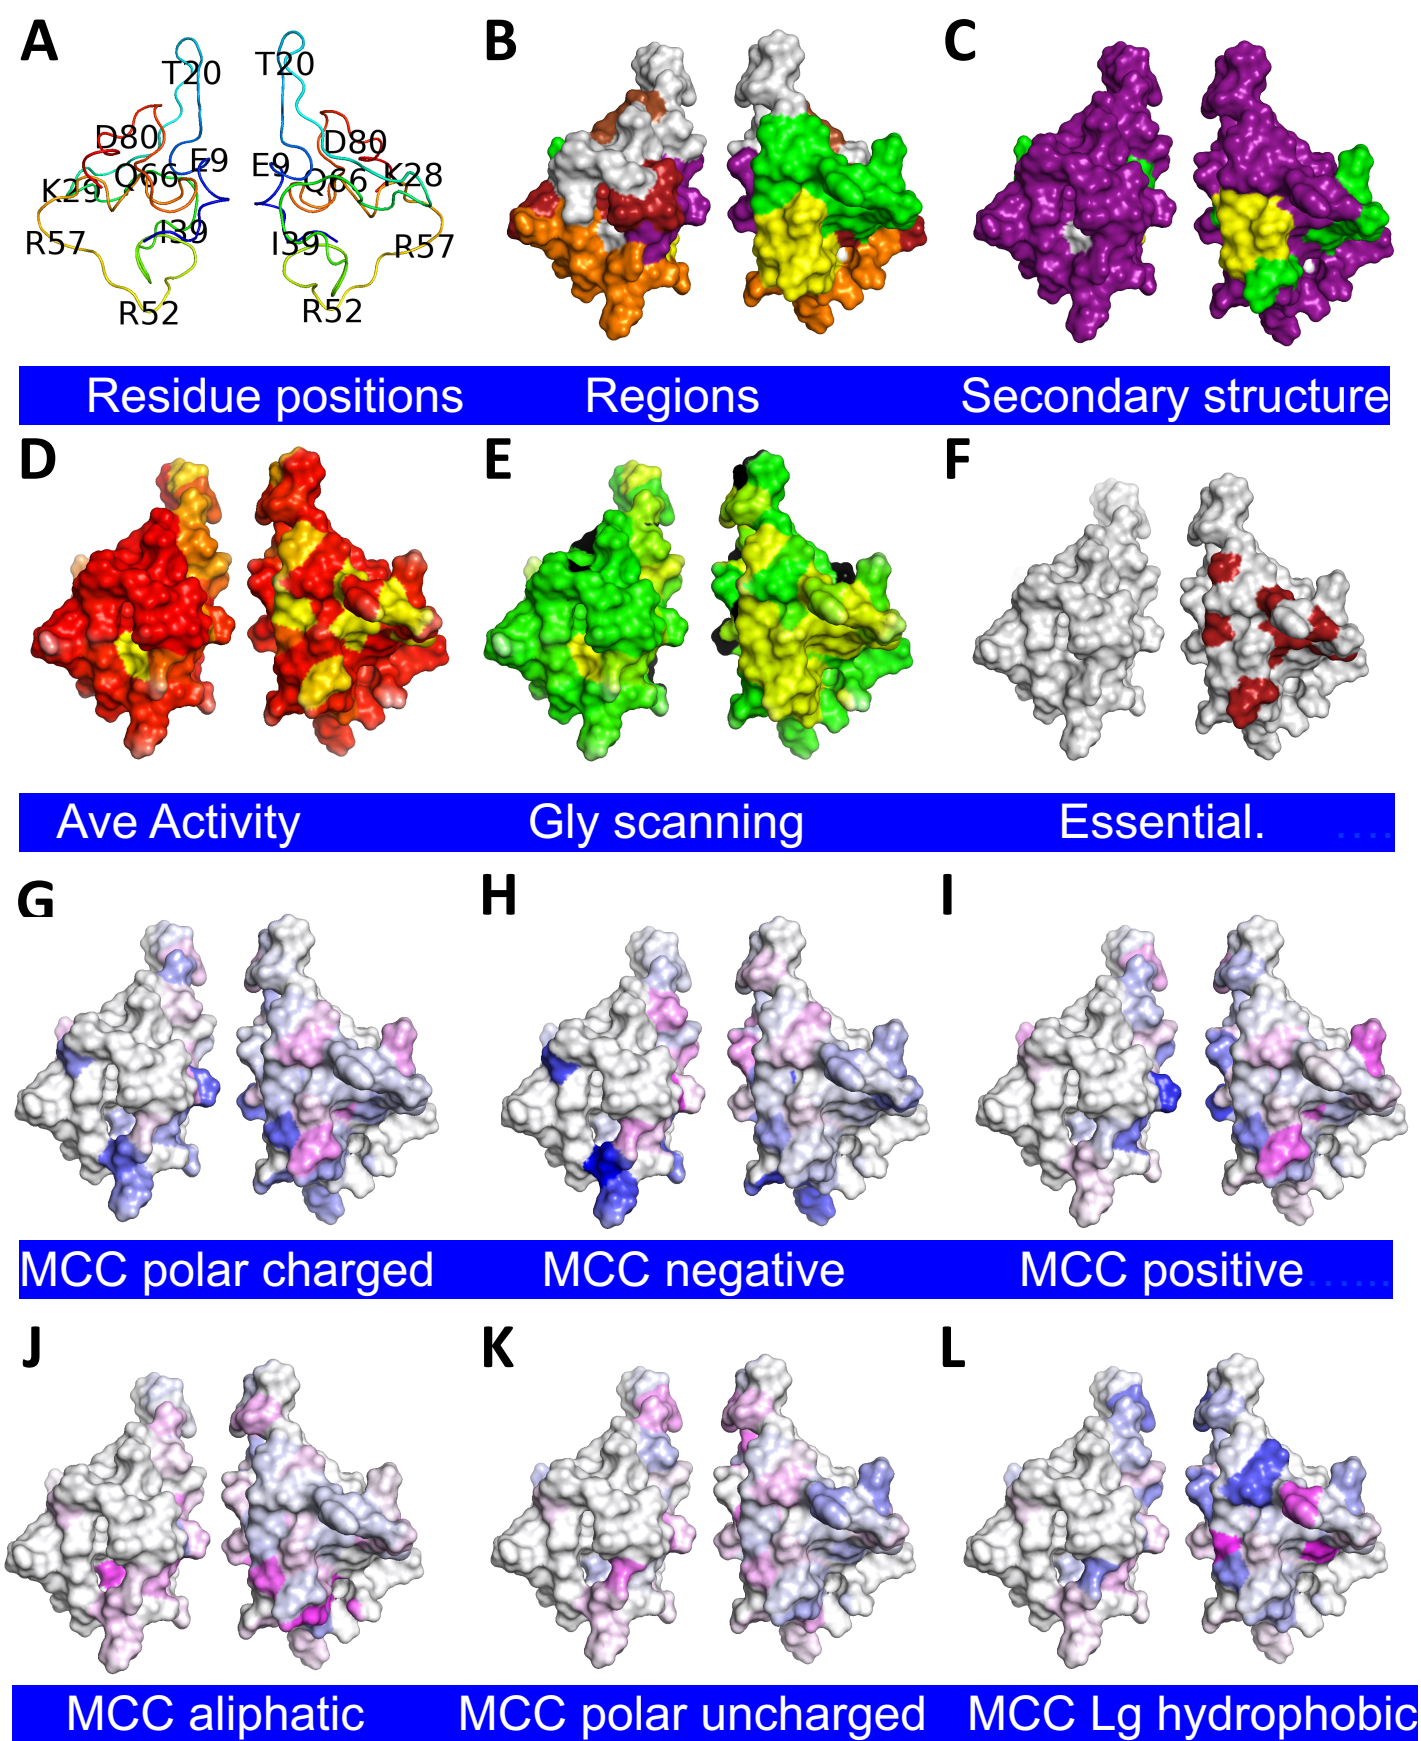

**Supplementary Figure S17. 3D surface plots.** All surface plots are on wild type Tat 3D structure (PDB: 1TEV): Panels **A-D** and **J-L** are repeated from **Fig. 2** here for visual comparison. **E.** Gly scanning mutagenesis of Tat; black indicates wild type Gly residues). **D-E.** yellow color indicates impaired activity. **F.** Tat positions that do not tolerate any substitution (yellow) **G-I.** Tat MCC surface plots with each position colored with a gradient of blue to white to magenta; Coloring of residues is as described in **Fig 3** and Methods. MCC = Mathews Correlation Coefficient. The color key for regions, secondary structure, PTMs, PPIs, PPVs, and Tat activity are as in **Fig. 2**.

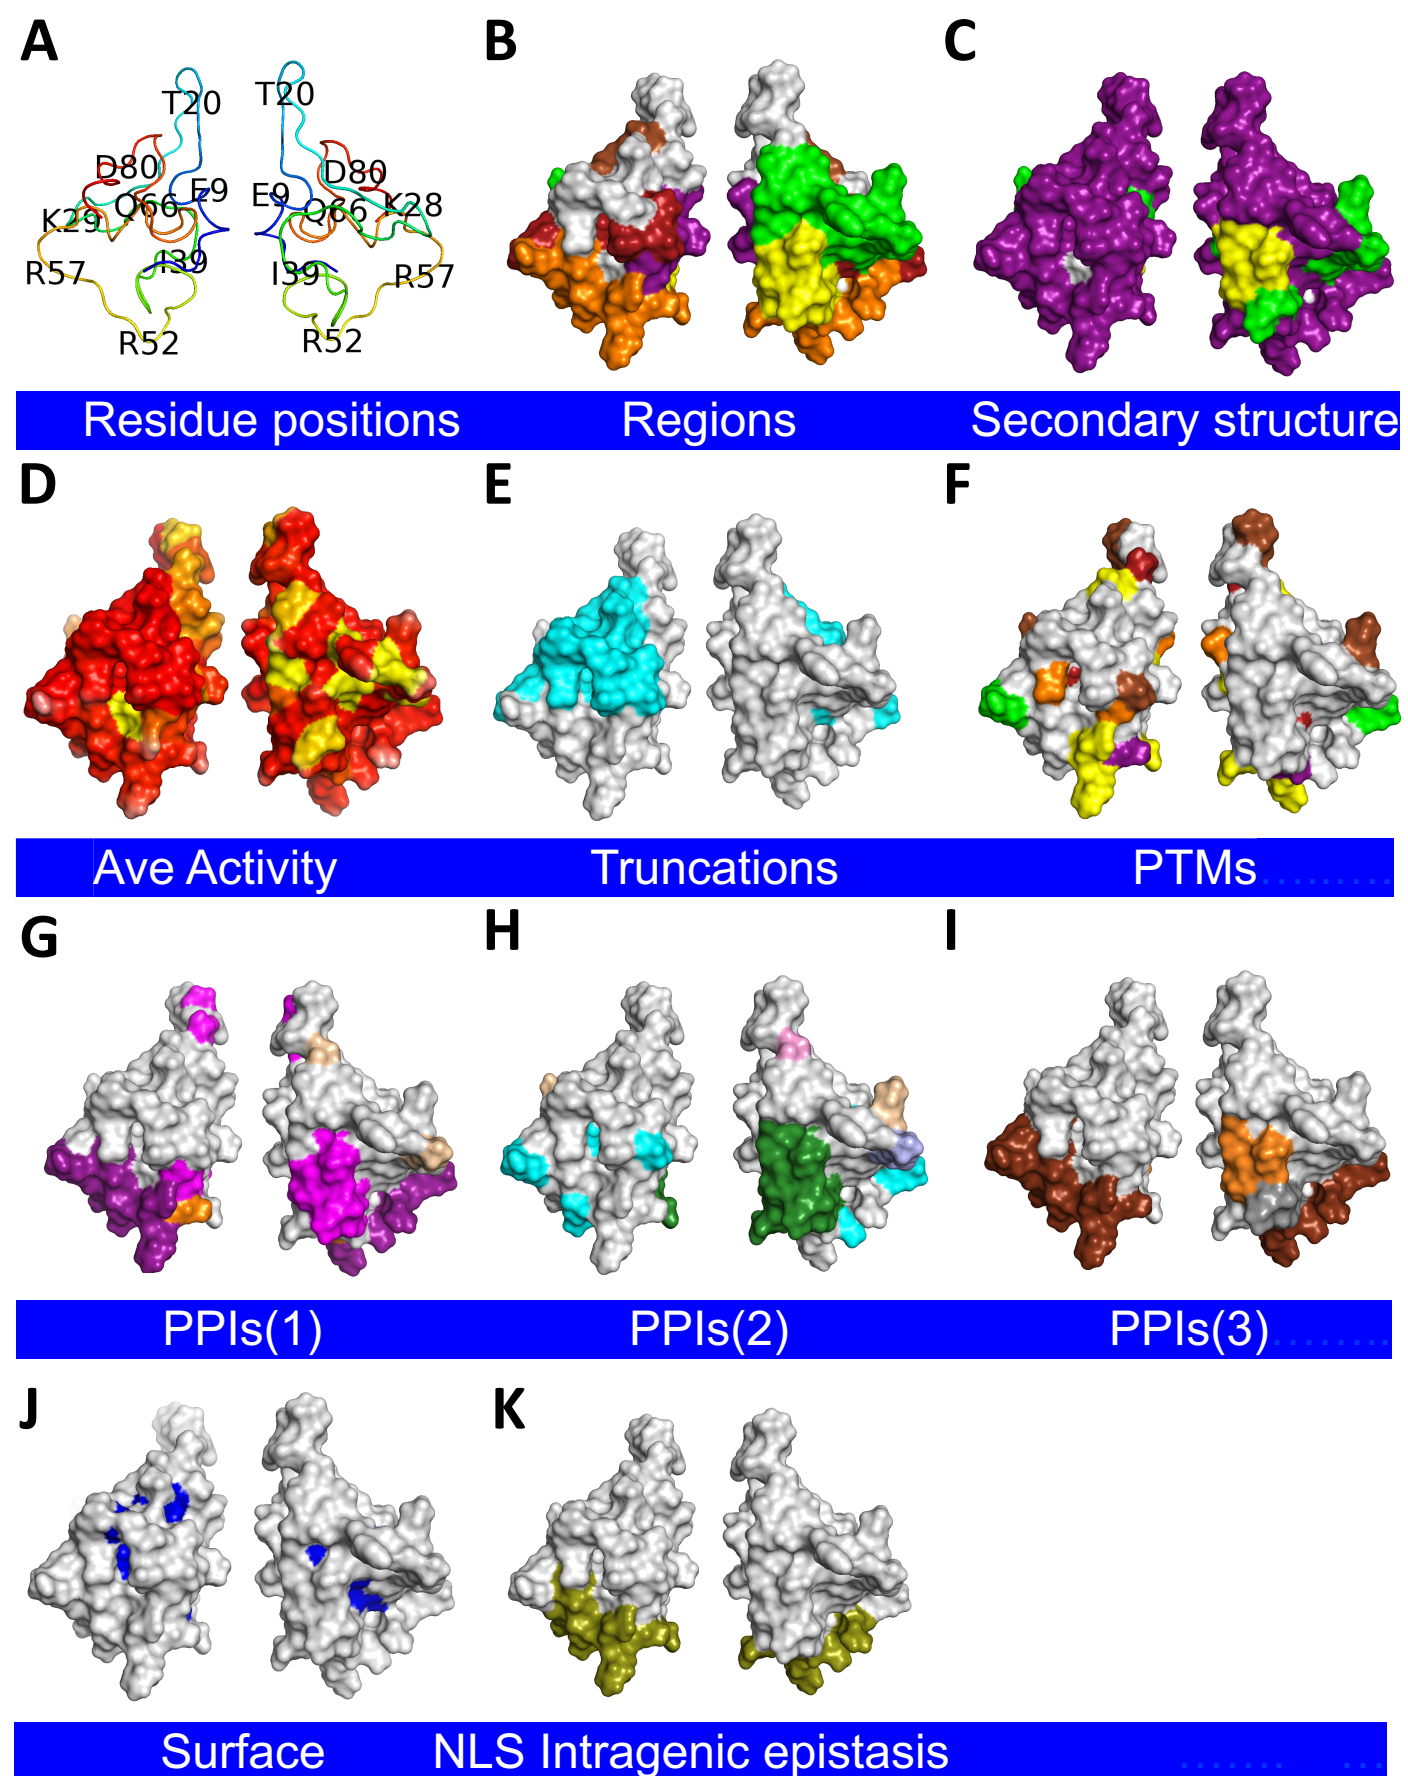

**Supplementary Figure S18. 3D structure surface plots of different properties and function of Tat.** All surface maps are on wild type Tat 3D structure (PDB: 1TEV): Panels **A-D** are repeated from **Fig. 2** here for visual comparison. **E.** Regions of Tat truncation and missense mutants that lose (light grey) or retain (cyan) activity. **F.** Tat PTMs. **G-I.** Tat PPIs in 3 groups. **J.** Solvent assessable surfaces are with residues with <10% solvent exposure colored blue. **K.** Residues in the NLS that have intragenic epistasis. The color key for regions, secondary structure, surface, and Tat activity are as in **Fig. 2**.

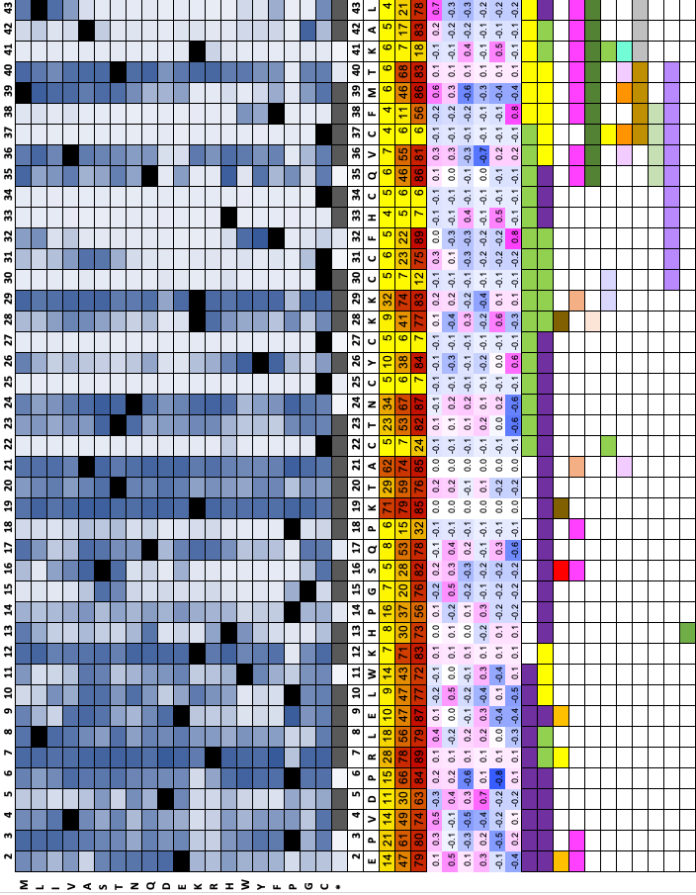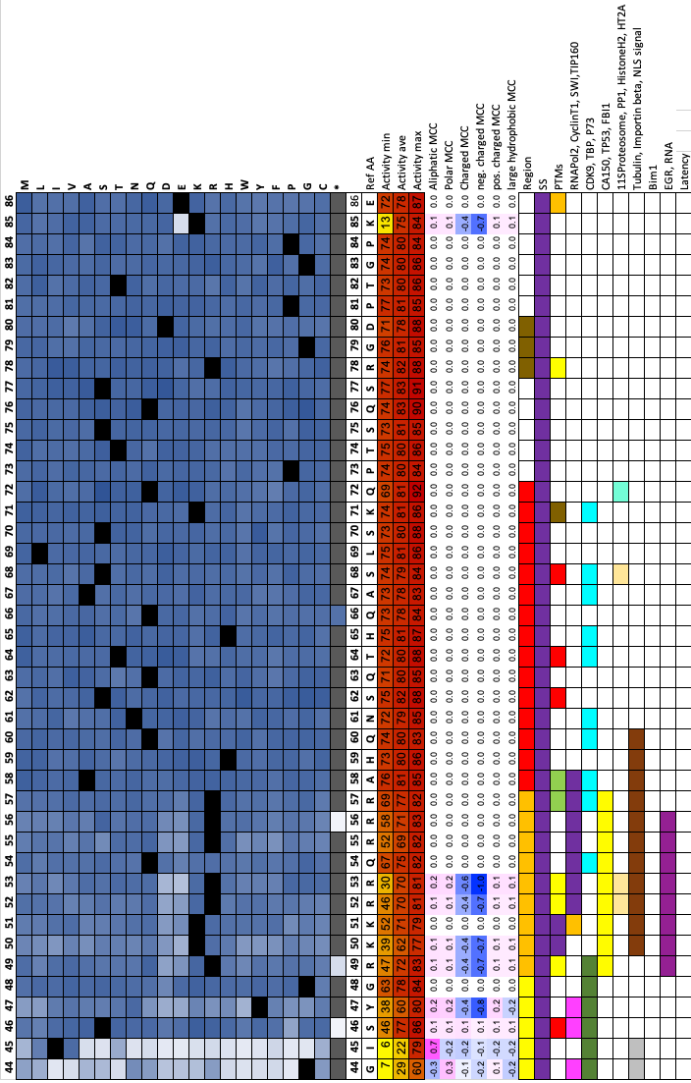

**Supplementary Figure S19. Heatmap for LentiX293T/LTR-GFP cells with scores for activities and accuracies for different physiochemical groups.** The color key activity heatmap are as in **Fig. 2**. The MCC scores were used to create surface plots with scores ranging from -1 (blue) to 0 (white) to 1 (magenta). White indicates no specificity, Magenta indicates high specificity for the physiochemical group, and blue indicates high specificity for negative preference against the physiochemical group.

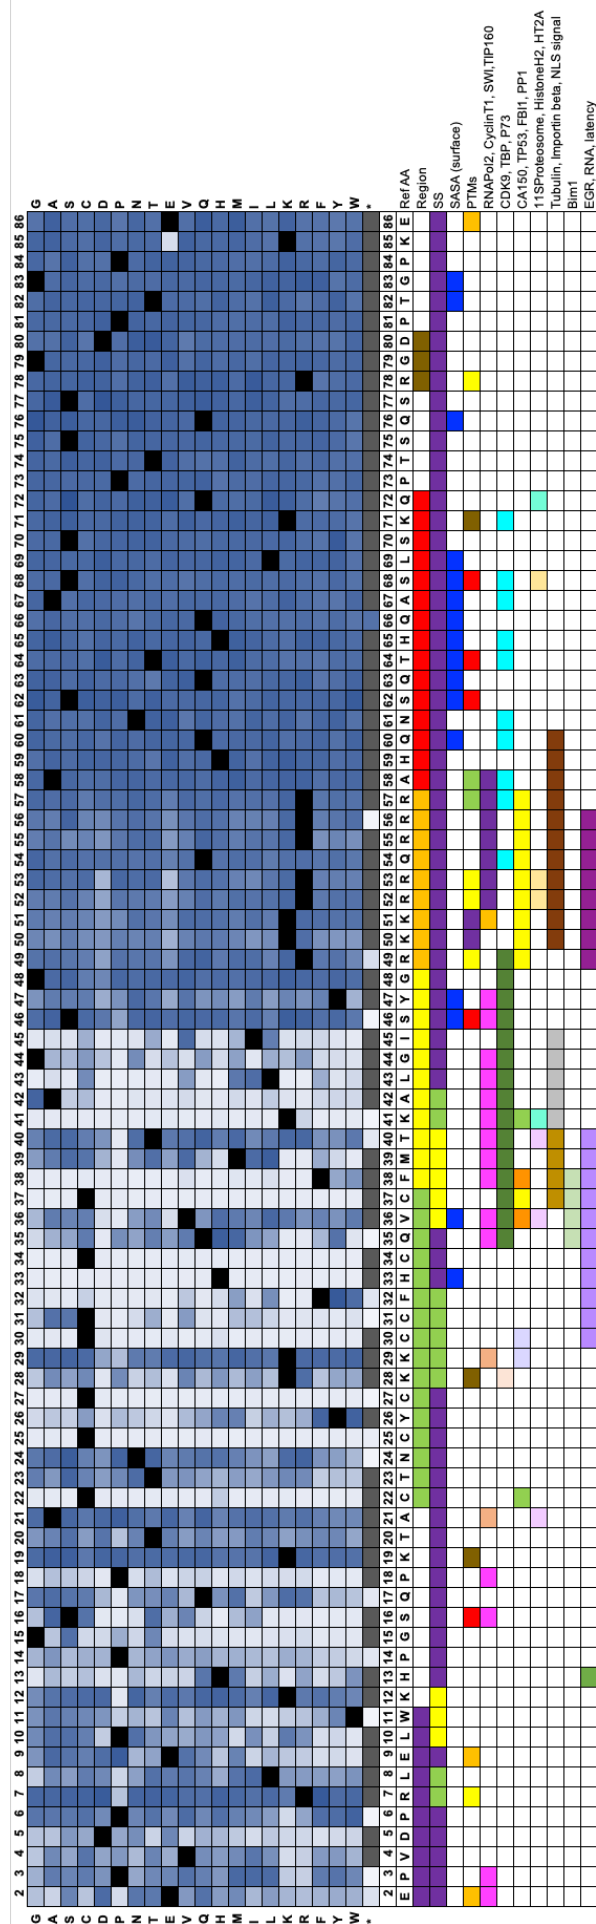

**Supplementary Figure S20. Heatmap for LentiX293T/LTR-GFP cells with amino acids ordered by side chain volume. The color key is as in Fig. 2.**
