# Supplementary material for: GigaAssay – a high-throughput assay system for molecular functions and cell processes
Source: Research Square preprint supplement (doi:10.21203/rs.3.rs-708936/v1), 2021-07-12
Supplement: Supplementary file 5 [file 3b28fc73b8f4e3cc3b9d1bcd.xlsx]

## Sheet: Tat Activities LentiX293T
Sample #			1	2	1	2	1	2	1	2	1	2
Position	Ref AA	Alt AA	%GFP+ rpm	%GFP+ rpm	GFP+ rpm	GFP+ rpm	GFP- rpm	GFP- rpm	Total rpm	Total rpm	Barcode #	Barcode #
2	E	A	18.779	15.1389	74.1526	90.9166	320.718	509.634	394.871	600.551	144	143
2	E	C	27.7304	22.8918	101.303	126.287	264.011	425.38	365.314	551.666	165	175
2	E	D	79.1411	72.1516	173.026	244.871	45.6036	94.5133	218.629	339.384	140	136
2	E	F	37.4502	30.5501	125.556	160.575	209.704	365.036	335.26	525.611	165	156
2	E	G	29.6117	25.1906	76.7317	94.4781	182.394	280.574	259.126	375.052	151	147
2	E	H	50.7089	48.3556	111.321	149.946	108.208	160.144	219.529	310.089	143	129
2	E	I	34.7579	34.3965	111.842	149.937	209.932	285.971	321.773	435.908	154	151
2	E	K	36.3216	31.6139	82.653	106.882	144.906	231.204	227.559	338.086	129	128
2	E	L	50.621	48.1924	121.067	164.718	118.096	177.075	239.164	341.793	132	134
2	E	M	61.2029	56.3744	137.796	195.641	87.3501	151.398	225.146	347.038	113	123
2	E	N	72.7845	70.3196	180.289	262.328	67.4136	110.723	247.703	373.051	158	147
2	E	P	14.397	10.4504	49.0783	52.3533	291.815	448.616	340.893	500.969	144	143
2	E	Q	75.0986	73.4143	140.252	195.536	46.5053	70.8098	186.757	266.345	124	127
2	E	R	31.0071	28.0069	79.6178	101.242	177.155	260.247	256.773	361.489	130	127
2	E	S	64.707	66.0433	168.458	235.912	91.8818	121.296	260.34	357.207	137	136
2	E	T	71.2675	67.3573	214.963	331.01	86.6655	160.414	301.629	491.424	144	148
2	E	V	52.9175	53.425	117.374	158.955	104.431	138.574	221.805	297.529	126	132
2	E	W	38.7168	35.253	96.0659	109.891	152.059	201.83	248.125	311.721	109	114
2	E	Y	42.0958	40.2728	109.496	149.823	150.616	222.197	260.112	372.02	133	137
3	P	A	69.6587	66.8793	89.127	128.155	38.8212	63.4663	127.948	191.622	78	86
3	P	C	69.825	63.2357	129.328	182.693	55.8891	106.215	185.217	288.908	119	118
3	P	D	56.0561	48.2147	100.227	127.719	78.5707	137.178	178.798	264.898	103	108
3	P	E	63.705	60.2568	129.889	179.488	74.0023	118.384	203.891	297.872	109	115
3	P	F	70.0562	64.8516	142.352	184.933	60.8449	100.23	203.197	285.163	118	120
3	P	G	39.3763	33.75	47.7449	58.7572	73.5081	115.338	121.253	174.095	78	69
3	P	H	53.3868	44.6136	124.839	144.691	109	179.629	233.839	324.32	140	127
3	P	I	79.8155	68.7103	107.543	141.077	27.1965	64.2444	134.74	205.321	86	78
3	P	K	23.5782	22.008	80.6939	101.818	261.546	360.821	342.24	462.639	140	140
3	P	L	79.2243	75.3782	143.147	189.912	37.5388	62.0337	180.686	251.946	116	112
3	P	M	80.4553	70.1325	125.041	168.575	30.3757	71.7916	155.417	240.367	105	105
3	P	N	44.3002	37.1574	98.6011	127.579	123.974	215.769	222.575	343.348	135	133
3	P	Q	66.8933	53.012	109.33	142.121	54.1092	125.971	163.439	268.092	107	106
3	P	R	21.0844	19.3853	49.09	64.7399	183.737	269.224	232.827	333.963	104	103
3	P	S	64.2835	54.3768	82.3431	102.315	45.7505	85.844	128.094	188.159	95	92
3	P	T	62.1677	64.8003	120.918	152.341	73.5849	82.7517	194.503	235.092	127	124
3	P	V	74.9851	77.568	124.79	189.173	41.6296	54.707	166.419	243.88	88	87
3	P	W	62.8539	55.5663	114.04	147.042	67.3969	117.582	181.437	264.624	115	119
3	P	Y	74.228	65.5685	153.411	200.156	53.2643	105.106	206.675	305.262	110	107
4	V	A	61.7728	58.9284	108.742	149.375	67.2934	104.111	176.035	253.486	110	111
4	V	C	73.6598	68.2191	144.451	195.436	51.6547	91.0469	196.106	286.483	126	140
4	V	D	46.3821	39.2141	87.5392	113.769	101.196	176.353	188.735	290.122	139	140
4	V	E	41.4415	36.6036	87.1708	96.68	123.176	167.447	210.347	264.127	139	136
4	V	F	52.3222	47.6565	112.856	160.06	102.839	175.802	215.695	335.862	142	138
4	V	G	26.436	26.5539	45.7478	63.0819	127.303	174.48	173.051	237.562	88	94
4	V	H	51.2459	48.9639	102.461	131.345	97.4787	136.904	199.94	268.25	127	126
4	V	I	72.6045	67.6068	128.427	187.219	48.4588	89.7044	176.886	276.924	108	115
4	V	K	13.7229	10.1899	46.5402	55.8155	292.603	491.935	339.143	547.751	136	146
4	V	L	58.0064	54.1889	89.6183	116.988	64.8789	98.9013	154.497	215.889	108	116
4	V	M	60.9216	48.5263	98.2853	107.207	63.0456	113.718	161.331	220.925	99	102
4	V	N	33.329	28.7151	82.4717	99.4023	164.976	246.766	247.447	346.168	120	120
4	V	P	53.1845	46.8717	128.913	170.183	113.475	192.9	242.387	363.084	134	137
4	V	Q	59.5159	56.8186	111.099	147.405	75.5719	112.025	186.671	259.43	130	124
4	V	R	21.1011	15.5504	51.0901	64.2545	191.03	348.946	242.12	413.201	125	138
4	V	S	44.7663	39.2922	67.6757	101.361	83.4997	156.607	151.175	257.969	99	99
4	V	T	64.9097	57.6375	128.117	169.295	69.2603	124.428	197.377	293.723	131	127
4	V	W	37.1784	29.3403	66.7049	78.2961	112.713	188.559	179.418	266.855	86	93
4	V	Y	52.9747	51.4447	105.876	138.966	93.9856	131.16	199.862	270.126	136	119
5	D	A	28.2383	23.1003	69.1348	77.7317	175.692	258.764	244.827	336.496	119	112
5	D	C	44.0212	40.581	80.7582	96.835	102.695	141.787	183.453	238.622	126	118
5	D	E	62.8099	62.0163	117.83	173.254	69.7679	106.115	187.598	279.368	117	106
5	D	F	11.1153	10.4399	40.1773	51.6983	321.282	443.5	361.46	495.198	124	115
5	D	G	27.9619	21.6153	57.1869	65.3452	147.33	236.964	204.517	302.31	111	119
5	D	H	34.9143	28.7684	81.9512	102.242	152.77	253.154	234.721	355.396	132	143
5	D	I	13.8238	10.9971	52.5171	63.272	327.387	512.079	379.904	575.351	136	139
5	D	K	16.4878	14.2655	54.7745	66.8891	277.439	401.997	332.213	468.886	135	133
5	D	L	25.1185	24.1879	71.0092	100.063	211.688	313.628	282.697	413.691	130	123
5	D	M	24.9668	23.8634	54.0435	66.4768	162.418	212.095	216.461	278.572	112	104
5	D	N	59.1633	47.2054	132.269	159.35	91.2974	178.217	223.567	337.566	131	129
5	D	P	44.3532	37.3049	78.6002	99.1216	98.6141	166.585	177.214	265.707	107	101
5	D	Q	38.3935	29.5019	80.5038	93.9869	129.177	224.592	209.681	318.579	117	109
5	D	R	16.789	14.8344	51.1954	69.6349	253.738	399.78	304.934	469.414	119	124
5	D	S	53.0916	49.4956	125.386	169.306	110.783	172.757	236.169	342.063	136	143
5	D	T	18.8211	16.9193	55.0084	68.5763	237.262	336.737	292.27	405.314	122	120
5	D	V	18.9097	17.544	67.1523	84.2145	287.968	395.806	355.12	480.02	166	160
5	D	W	18.3142	15.5168	59.9736	73.3075	267.497	399.132	327.471	472.439	134	150
5	D	Y	15.3588	14.9054	75.872	104.847	418.126	598.567	493.998	703.414	147	148
6	P	A	72.5655	67.3993	126.427	170.999	47.7976	82.7116	174.225	253.711	89	102
6	P	C	75.5408	65.1736	120.526	171.458	39.0249	91.6213	159.551	263.08	105	115
6	P	D	61.3596	56.2664	111.701	145.907	70.3423	113.408	182.043	259.315	112	104
6	P	E	61.5232	53.6765	114.888	150.943	71.8517	130.265	186.74	281.208	122	120
6	P	F	77.3052	74.6731	131.065	181.067	38.4772	61.4126	169.542	242.48	99	98
6	P	G	73.3424	74.1359	113.69	156.446	41.3224	54.5801	155.012	211.026	98	101
6	P	H	76.3316	72.8665	166.911	216.256	51.7549	80.5276	218.666	296.783	111	104
6	P	I	61.2076	57.6252	99.1216	140.989	62.8218	103.677	161.943	244.666	95	96
6	P	K	15.1937	13.0458	47.4467	62.2018	264.832	414.593	312.279	476.795	139	141
6	P	L	50.2733	44.4159	91.7236	110.707	90.7263	138.544	182.45	249.251	112	120
6	P	M	66.6289	62.6172	136.966	173.371	68.5991	103.503	205.565	276.874	122	118
6	P	N	63.8779	60.7605	106.841	133.96	60.4174	86.5119	167.259	220.471	114	109
6	P	Q	62.247	55.0747	85.8286	109.97	52.0554	89.7044	137.884	199.675	108	111
6	P	R	45.8512	42.5882	69.2313	93.6535	81.7599	126.251	150.991	219.905	103	104
6	P	S	71.8182	67.164	92.0979	120.971	36.1396	59.1418	128.237	180.112	96	90
6	P	T	74.7556	75.1996	116.295	168.99	39.272	55.7322	155.567	224.723	107	106
6	P	V	78.7259	71.1558	141.843	200.384	38.3303	81.2289	180.173	281.613	111	112
6	P	W	83.6377	79.3381	126.386	185.675	24.7253	48.3553	151.111	234.031	96	104
6	P	Y	78.1434	76.3044	144.516	182.447	40.4208	56.6572	184.936	239.104	95	90
7	R	A	81.4409	78.9221	158.236	242.801	36.0594	64.8455	194.295	307.646	106	98
7	R	C	83.2607	75.8545	155.174	222.484	31.1972	70.8198	186.371	293.304	124	124
7	R	D	87.8873	74.9594	137.726	180.061	18.9815	60.1503	156.707	240.211	100	103
7	R	E	82.7744	82.7104	144.135	199.852	29.995	41.7766	174.13	241.628	96	102
7	R	F	88.7879	75.6849	113.766	141.907	14.3663	45.5902	128.132	187.498	90	87
7	R	G	80.8369	76.276	162.367	229.66	38.4906	71.4309	200.858	301.091	101	104
7	R	H	83.494	76.903	206.864	301.991	40.895	90.6996	247.759	392.69	138	130
7	R	I	75.8604	72.4968	132.734	160.718	42.2374	60.9718	174.972	221.69	98	100
7	R	K	69.8638	59.5475	164.016	230.178	70.7497	156.367	234.766	386.544	126	133
7	R	L	79.6243	76.1267	183.874	248.585	47.0529	77.9562	230.927	326.541	121	126
7	R	M	79.8786	75.3225	176.464	253.529	44.4515	83.0623	220.916	336.592	118	128
7	R	N	81.8772	77.4988	196.483	278.838	43.4897	80.9584	239.973	359.796	115	118
7	R	P	28.4682	22.1668	83.349	99.3906	209.431	348.986	292.78	448.377	143	144
7	R	Q	76.0166	70.306	203.372	275.709	64.1643	116.447	267.536	392.156	131	132
7	R	S	82.8915	78.5107	179.693	269.171	37.088	73.6751	216.781	342.846	123	134
7	R	T	83.5251	75.9266	194.43	277.522	38.3503	87.9913	232.781	365.513	129	135
7	R	V	77.3464	72.6654	162.797	236.514	47.6807	88.9698	210.478	325.484	125	127
7	R	W	80.5266	81.1727	160.823	244.95	38.8913	56.8142	199.715	301.764	134	123
7	R	Y	78.2709	73.6541	196.892	267.065	54.6602	95.5285	251.553	362.594	141	145
8	L	A	61.4678	54.5467	121.865	157.417	76.3934	131.174	198.259	288.591	124	123
8	L	C	69.0043	68.9671	108.707	152.914	48.8295	68.8061	157.536	221.72	115	105
8	L	D	62.0092	51.7536	121.245	145.703	74.2828	135.829	195.528	281.532	123	121
8	L	E	70.1872	67.12	141.264	182.506	60.0033	89.4039	201.267	271.91	125	131
8	L	F	49.8732	45.0891	77.5387	91.4692	77.9329	111.394	155.472	202.863	111	117
8	L	G	22.2894	16.7812	64.4475	76.0153	224.692	376.964	289.139	452.98	141	146
8	L	H	41.9402	40.8822	69.3366	89.0744	95.986	128.806	165.323	217.88	112	103
8	L	I	79.1319	73.2175	153.288	215.817	40.4241	78.9447	193.712	294.762	127	126
8	L	K	52.347	47.4823	99.876	121.55	90.92	134.44	190.796	255.989	132	134
8	L	M	74.2515	66.9456	110.505	150.981	38.3202	74.5467	148.825	225.527	92	95
8	L	N	48.406	44.528	67.6815	86.1444	72.1389	107.317	139.82	193.461	108	103
8	L	P	18.1151	13.5102	76.9861	85.8286	347.998	549.457	424.984	635.286	150	149
8	L	Q	65.9169	54.5902	117.435	150.077	60.7213	124.839	178.157	274.916	113	120
8	L	R	51.405	40.7657	86.8374	104.917	82.0905	152.449	168.928	257.367	135	126
8	L	S	49.9494	51.2335	82.5711	112.654	82.7383	107.23	165.309	219.884	119	117
8	L	T	75.6544	67.5235	140.012	199.132	45.0559	95.7756	185.068	294.908	116	113
8	L	V	73.5143	67.6138	148.796	207.212	53.6083	99.2519	202.405	306.463	128	134
8	L	W	56.1789	55.3801	113.169	150.721	88.2752	121.436	201.444	272.156	111	118
8	L	Y	48.5869	40.2672	100.414	121.146	106.255	179.709	206.669	300.855	149	147
9	E	A	80.1206	79.6012	157.876	239.608	39.1718	61.4026	197.048	301.01	112	117
9	E	C	67.808	61.0017	131.299	169.131	62.3343	108.125	193.633	277.256	122	130
9	E	D	77.3993	73.7252	134.287	168.271	39.2119	59.9699	173.499	228.241	110	112
9	E	F	12.8772	10.4181	61.0087	75.8574	412.763	652.276	473.772	728.133	155	171
9	E	G	55.1354	46.1644	117.356	143.217	95.4951	167.016	212.851	310.233	126	132
9	E	H	26.9441	21.9293	76.7843	100.785	208.192	358.808	284.976	459.593	155	169
9	E	I	18.647	16.451	80.4541	97.7707	351.003	496.544	431.458	594.314	180	176
9	E	K	25.7902	19.9045	82.9337	97.3555	238.637	391.758	321.571	489.114	164	168
9	E	L	36.2862	29.9987	86.9427	108.716	152.66	253.685	239.603	362.401	130	138
9	E	M	65.4987	58.1471	166.21	216.993	87.5505	156.186	253.76	373.179	145	148
9	E	N	35.5702	30.2091	87.4603	107.54	158.42	248.445	245.881	355.986	145	151
9	E	P	87.3332	81.8236	171.762	249.819	24.9123	55.4951	196.675	305.314	122	120
9	E	Q	61.1269	61.217	132.866	178.851	84.4949	113.308	217.361	292.158	149	146
9	E	R	23.3265	21.3996	65.7312	91.5569	216.056	336.286	281.787	427.843	143	150
9	E	S	73.6998	70.7548	180.722	245.661	64.4916	101.539	245.214	347.2	134	131
9	E	T	46.6089	41.3876	107.666	135.556	123.333	191.972	230.999	327.528	138	141
9	E	V	75.0284	66.8931	234.906	320.84	78.1833	158.791	313.089	479.631	181	173
9	E	W	10.0759	8.3289	54.0025	70.2226	481.954	772.897	535.956	843.119	179	184
9	E	Y	15.5025	14.8179	56.722	78.7581	309.167	452.75	365.889	531.508	153	152
10	P	A	76.7015	69.2774	133.708	175.394	40.6145	77.7826	174.323	253.177	94	96
10	P	C	67.5656	54.6313	84.6268	111.698	40.6245	92.76	125.251	204.458	102	96
10	P	D	22.8835	21.1222	39.0632	51.0287	131.641	190.559	170.705	241.588	105	107
10	P	E	45.9869	37.2502	95.3788	108.695	112.025	183.102	207.404	291.798	138	130
10	P	F	13.2741	10.2266	37.2123	41.9055	243.126	367.864	280.338	409.77	102	107
10	P	G	61.3477	50.7611	74.6702	94.9255	47.0462	92.0788	121.716	187.004	92	88
10	P	H	47.6629	40.2165	81.5652	94.5132	89.5642	140.498	171.129	235.011	100	100
10	P	I	57.5428	50.728	77.0826	94.9957	56.8743	92.2691	133.957	187.265	105	106
10	P	K	70.3168	68.0501	142.744	191.389	60.2571	89.8581	203.001	281.247	119	116
10	P	L	21.2229	19.3534	56.6518	74.5561	210.285	310.68	266.937	385.236	108	112
10	P	M	15.6299	13.5813	38.0369	45.1776	205.323	287.467	243.36	332.645	106	111
10	P	N	76.2818	67.5846	132.331	189.912	41.1454	91.087	173.476	280.999	107	112
10	P	Q	53.5952	48.6197	109.795	148.174	95.0643	156.587	204.859	304.761	126	114
10	P	R	55.9351	43.9257	130.032	147.446	102.438	188.225	232.47	335.671	135	138
10	P	S	76.3671	66.6451	126.515	176.052	39.1518	88.1115	165.667	264.164	101	106
10	P	T	54.4833	46.1957	82.6004	100.794	69.0065	117.395	151.607	218.189	89	93
10	P	V	42.2936	40.802	77.1557	95.8525	105.273	139.068	182.429	234.921	121	121
10	P	W	8.72134	8.1484	29.8084	40.8265	311.979	460.21	341.787	501.037	120	110
10	P	Y	17.197	14.2571	47.7742	55.4938	230.032	333.742	277.806	389.236	103	95
11	W	A	72.0699	60.3602	142.767	187.547	55.3281	123.166	198.095	310.713	98	105
11	W	C	62.2131	59.8344	95.3378	136.498	57.9062	91.628	153.244	228.126	102	105
11	W	D	55.0981	47.0376	104.157	129.152	84.8823	145.42	189.039	274.572	116	112
11	W	E	65.2642	62.749	142.059	205.194	75.6086	121.813	217.668	327.007	127	124
11	W	F	40.3972	35.9951	94.3904	109.505	139.265	194.717	233.656	304.222	119	127
11	W	G	56.7609	48.9008	112.733	149.112	85.8774	155.816	198.611	304.928	105	111
11	W	H	38.7193	37.5073	80.5593	104.496	127.5	174.106	208.06	278.602	116	120
11	W	I	17.3815	12.3707	45.2127	50.9205	214.907	360.701	260.12	411.622	125	124
11	W	K	22.8846	19.5122	53.6692	66.2136	180.852	273.131	234.521	339.344	118	124
11	W	L	13.7363	11.5361	48.7742	58.7308	306.302	450.376	355.076	509.106	126	133
11	W	M	54.3138	47.0686	83.0741	110.61	69.8781	124.388	152.952	234.998	92	100
11	W	N	36.9824	34.1628	85.7877	102.882	146.181	198.27	231.969	301.152	115	122
11	W	P	22.4337	17.7799	83.0156	89.0451	287.033	411.775	370.048	500.82	141	143
11	W	Q	51.959	49.4867	131.032	169.648	121.152	173.167	252.185	342.816	142	137
11	W	R	28.0424	22.3052	70.2138	87.3024	180.17	304.097	250.384	391.4	129	132
11	W	S	66.3129	61.0756	119.549	156.332	60.7313	99.6326	180.281	255.965	98	102
11	W	T	27.7411	28.2529	68.9389	87.2439	179.569	221.553	248.508	308.797	107	107
11	W	V	29.9848	26.2082	58.608	70.7753	136.851	199.275	195.459	270.051	94	108
11	W	Y	64.0964	61.377	112.891	152.025	63.2359	95.6654	176.127	247.69	100	106
12	K	A	74.1826	74.6054	139.556	191.448	48.569	65.1661	188.125	256.614	97	89
12	K	C	78.896	66.3517	141.322	181.763	37.8026	92.1756	179.125	273.939	116	116
12	K	D	80.1902	72.1625	190.93	251.056	47.1665	96.8475	238.097	347.903	120	130
12	K	E	79.0577	76.7585	149.463	214.536	39.5926	64.9591	189.056	279.495	116	112
12	K	F	74.9945	72.075	104.321	145.475	34.7838	56.3633	139.104	201.838	91	93
12	K	G	60.2062	49.5481	105.303	121.169	69.6009	123.38	174.904	244.549	103	105
12	K	H	83.0107	75.8122	130.208	191.921	26.6489	61.2322	156.857	253.154	101	102
12	K	I	66.9861	66.5695	79.9687	115.567	39.4122	58.0364	119.381	173.603	79	83
12	K	L	81.8826	80.776	167.35	246.512	37.0279	58.6675	204.378	305.179	99	107
12	K	M	78.4966	70.5025	96.5484	137.971	26.4485	57.7258	122.997	195.697	77	75
12	K	N	82.152	71.5385	124.69	191.781	27.0897	76.2999	151.78	268.081	109	105
12	K	P	7.18659	6.59275	28.8493	41.1949	372.583	583.657	401.432	624.852	127	129
12	K	Q	81.317	80.8132	148.691	212.501	34.1626	50.4525	182.854	262.954	105	109
12	K	R	71.056	69.6372	98.452	154.981	40.1035	67.5739	138.556	222.555	75	82
12	K	S	77.7055	72.5316	119.804	162.718	34.373	61.623	154.177	224.341	105	103
12	K	T	67.1581	58.6875	88.1533	107.479	43.109	75.6587	131.262	183.137	88	84
12	K	V	71.5459	61.8945	130.059	173.403	51.7248	106.756	181.784	280.159	114	110
12	K	W	63.411	58.6384	167.183	219.423	96.4668	154.774	263.65	374.196	134	131
12	K	Y	68.7875	64.3728	137.331	185.035	62.3142	102.408	199.645	287.443	115	116
13	H	A	33.6067	25.8743	71.6642	82.9981	141.58	237.776	213.244	320.774	122	113
13	H	C	29.9029	23.8969	73.8222	88.01	173.051	280.28	246.873	368.29	137	129
13	H	D	10.9179	6.42559	36.9842	37.107	301.763	540.381	338.747	577.488	120	118
13	H	E	19.095	18.8462	43.3792	61.2836	183.797	263.894	227.176	325.177	111	110
13	H	F	14.0322	11.6965	76.2258	89.4136	466.996	675.031	543.222	764.444	151	153
13	H	G	8.68076	8.53053	16.3809	23.4689	172.323	251.648	188.703	275.117	63	63
13	H	I	21.4413	17.407	55.4763	67.2254	203.259	318.971	258.736	386.197	129	130
13	H	K	10.6873	9.4375	34.37	45.7215	287.227	438.744	321.597	484.466	146	136
13	H	L	41.2136	33.5969	77.2317	91.9078	110.162	181.653	187.394	273.561	115	126
13	H	M	70.401	61.3239	143.814	195.109	60.4642	123.052	204.278	318.161	115	124
13	H	N	34.762	30.2474	83.6882	116.19	157.058	267.941	240.746	384.131	126	129
13	H	P	8.27715	5.68533	46.9671	51.0112	520.464	846.231	567.431	897.242	170	166
13	H	Q	72.8884	67.7433	157.025	219.572	58.4071	104.552	215.432	324.123	122	139
13	H	R	46.4816	42.0423	95.3905	110.426	109.831	152.229	205.222	262.655	111	115
13	H	S	22.1577	17.873	67.8745	78.7756	238.45	361.977	306.325	440.753	141	139
13	H	T	17.9753	14.2364	72.5063	82.9045	330.86	499.436	403.366	582.34	157	151
13	H	V	18.7503	14.9299	63.7165	65.5236	276.099	373.351	339.816	438.875	128	132
13	H	W	55.7287	51.7572	113.046	146.562	89.8046	136.61	202.851	283.173	134	132
13	H	Y	25.1924	19.0657	65.9242	80.9512	195.759	343.64	261.683	424.591	124	130
14	P	A	54.5715	52.571	115.076	147.989	95.7956	133.515	210.871	281.504	129	135
14	P	C	39.5724	32.6252	89.1913	107.672	136.196	222.354	225.388	330.026	104	108
14	P	D	37.4803	33.9951	81.1208	107.064	135.315	207.874	216.436	314.938	125	130
14	P	E	55.8741	46.1567	112.97	144.808	89.2169	168.923	202.187	313.731	122	117
14	P	F	22.8384	19.8647	46.5168	58.8741	157.161	237.502	203.678	296.376	101	109
14	P	G	36.8651	31.2262	70.9741	89.9048	121.549	198.01	192.524	287.914	122	119
14	P	H	36.6698	33.0225	78.4686	89.32	135.518	181.162	213.987	270.482	109	121
14	P	I	33.5825	26.437	77.027	82.1559	152.339	228.606	229.366	310.762	104	106
14	P	K	41.0055	32.1398	84.7642	104.321	121.95	220.264	206.714	324.584	130	122
14	P	L	29.406	20.4928	91.3464	92.0043	219.292	356.954	310.638	448.959	141	139
14	P	M	39.3374	34.1917	76.3603	85.3549	117.756	164.281	194.116	249.636	114	109
14	P	N	35.7744	31.7832	81.2202	106.128	145.814	227.784	227.034	333.912	128	121
14	P	Q	49.6852	39.7387	109.347	129.217	110.733	195.949	220.08	325.166	133	134
14	P	R	36.908	31.7915	85.8461	98.6011	146.749	211.548	232.595	310.149	129	120
14	P	S	32.6872	34.4825	56.3652	86.3608	116.073	164.087	172.438	250.448	101	108
14	P	T	46.563	38.7713	105.803	130.962	121.423	206.819	227.226	337.781	135	131
14	P	V	41.9493	37.9489	92.7295	130.468	128.322	213.331	221.051	343.799	107	105
14	P	W	16.2898	12.1312	55.0435	66.5061	282.859	481.716	337.902	548.222	135	133
14	P	Y	22.9797	21.462	57.4179	76.5299	192.446	280.053	249.864	356.583	129	131
15	G	A	27.2968	25.0784	60.3449	77.6352	160.725	231.935	221.07	309.57	103	106
15	G	C	16.1627	14.0225	65.3627	77.6352	339.042	476.013	404.404	553.648	140	149
15	G	D	15.6573	10.4775	33.6419	33.8262	181.222	289.02	214.864	322.846	94	92
15	G	E	12.9311	10.5414	42.8704	54.5552	288.659	462.979	331.53	517.534	116	119
15	G	F	7.05109	7.71077	31.4459	53.6049	414.527	641.589	445.972	695.194	143	150
15	G	H	9.85267	8.46568	53.5639	68.5354	490.085	741.032	543.649	809.567	153	152
15	G	I	7.50006	6.21713	46.1542	59.108	569.23	891.621	615.384	950.729	139	134
15	G	K	11.4895	9.23062	45.9788	53.5698	354.203	526.779	400.181	580.349	144	134
15	G	L	9.58687	6.92257	39.9668	44.6688	376.924	600.594	416.891	645.263	120	124
15	G	M	9.24583	6.83901	34.9198	39.92	342.762	543.79	377.681	583.71	121	121
15	G	N	17.099	13.797	48.897	61.2427	237.068	382.641	285.965	443.884	130	124
15	G	P	41.1214	35.1375	92.9517	117.14	133.091	216.236	226.042	333.376	102	112
15	G	Q	13.2	11.8905	65.7341	84.2496	432.252	624.298	497.986	708.547	161	160
15	G	R	15.2202	14.2617	41.8002	54.7745	232.837	329.294	274.637	384.068	127	123
15	G	S	76.3456	71.8316	98.7503	148.84	30.5961	58.367	129.346	207.207	86	89
15	G	T	62.6475	58.4589	137.357	185.535	81.8968	131.842	219.254	317.377	124	133
15	G	V	10.2785	8.98965	29.2996	36.7123	255.759	371.671	285.058	408.384	104	98
15	G	W	7.65794	6.18247	34.2034	41.7827	412.436	634.042	446.639	675.825	125	122
15	G	Y	8.38853	6.05352	42.5459	47.0139	464.645	729.624	507.191	776.638	147	146
16	S	A	82.3828	75.766	165.844	229.818	35.465	73.5081	201.309	303.326	106	108
16	S	C	74.6237	72.0956	132.515	181.473	45.0626	70.2388	177.578	251.712	102	101
16	S	D	7.08177	5.40457	38.6743	47.1309	507.437	824.926	546.111	872.056	136	146
16	S	E	39.8664	39.4085	85.8345	108.116	129.471	166.231	215.305	274.348	109	110
16	S	F	5.85038	6.18047	28.7382	45.8443	462.481	695.916	491.219	741.76	124	123
16	S	G	30.0243	28.9913	64.5644	90.9517	150.476	222.768	215.04	313.72	109	111
16	S	H	5.01067	4.77896	17.5271	27.3756	332.269	545.46	349.796	572.835	103	101
16	S	I	47.4014	39.4702	92.4605	114.944	102.598	176.273	195.059	291.217	110	114
16	S	K	7.78127	5.29937	33.7998	37.8351	400.574	676.119	434.374	713.955	112	114
16	S	L	7.52759	7.68339	26.5977	39.6568	326.739	476.48	353.337	516.137	116	113
16	S	M	32.4248	25.5888	65.0118	71.4595	135.488	207.801	200.5	279.26	109	102
16	S	N	12.2383	9.05724	51.941	57.0378	372.473	572.71	424.414	629.748	129	135
16	S	P	5.95336	5.77174	29.8494	45.8092	471.538	747.871	501.387	793.68	141	138
16	S	Q	19.2758	15.753	35.7385	41.8031	149.668	223.563	185.406	265.366	97	85
16	S	R	7.74238	5.55606	34.6332	39.2475	412.687	667.143	447.32	706.39	140	137
16	S	T	77.3952	72.6716	139.366	194.185	40.7046	73.0239	180.071	267.208	108	113
16	S	V	64.4941	63.1745	115.058	153.545	63.3428	89.5041	178.401	243.049	105	107
16	S	W	6.99517	5.93061	34.2034	46.8969	454.754	743.864	488.957	790.761	129	125
16	S	Y	6.5452	4.75923	25.4749	30.0774	363.74	601.903	389.215	631.981	123	123
17	Q	A	78.2216	72.313	218.537	304.067	60.8449	116.42	279.381	420.487	141	139
17	Q	C	70.021	68.5765	163.142	226.578	69.848	103.824	232.99	330.402	139	134
17	Q	D	34.7744	26.1842	87.8199	106.584	164.722	300.471	252.542	407.055	136	129
17	Q	E	65.903	62.0914	127.567	171.412	66.001	104.652	193.568	276.063	124	120
17	Q	F	28.529	21.7929	77.9276	86.045	195.225	308.786	273.152	394.831	122	127
17	Q	G	72.5744	64.6229	135.135	174.891	51.0669	95.7422	186.202	270.633	108	111
17	Q	H	56.9468	53.7783	126.445	162.674	95.5952	139.816	222.04	302.491	129	122
17	Q	I	24.4328	20.4581	51.0258	63.1433	157.816	245.503	208.842	308.647	100	105
17	Q	K	78.0356	76.3472	173.412	264.521	48.8095	81.9502	222.221	346.471	113	115
17	Q	L	53.9258	46.1558	122.322	151.077	104.512	176.243	226.833	327.32	123	123
17	Q	M	75.5569	62.4535	111.795	148.095	36.1663	89.0332	147.961	237.128	83	88
17	Q	N	55.0311	48.9426	130.778	175.271	106.866	182.845	237.644	358.117	131	128
17	Q	P	7.95512	6.71978	59.7923	75.293	691.828	1045.18	751.621	1120.47	173	174
17	Q	R	74.9887	74.4322	171.271	226.905	57.1247	77.9429	228.396	304.848	116	121
17	Q	S	74.0483	67.0832	161.394	224.397	56.5637	110.109	217.957	334.505	119	125
17	Q	T	58.7006	58.1036	106.426	144.2	74.8773	103.977	181.303	248.177	115	118
17	Q	V	34.4628	29.6541	77.4949	92.9868	147.37	220.584	224.865	313.571	123	130
17	Q	W	27.9479	22.0371	68.6962	79.9248	177.105	282.758	245.801	362.683	134	139
17	Q	Y	34.1797	30.205	99.8293	129.796	192.242	299.92	292.072	429.715	133	130
18	P	A	30.0695	26.2491	58.8273	70.5472	136.811	198.213	195.638	268.761	105	100
18	P	C	18.2117	13.073	59.7046	65.7165	268.132	436.974	327.836	502.691	118	115
18	P	D	7.27316	5.72472	35.1946	45.891	448.703	755.739	483.897	801.63	116	117
18	P	E	10.3751	7.82131	48.9087	61.4883	422.495	724.675	471.403	786.163	142	154
18	P	F	6.30276	4.96047	31.7617	40.2124	472.172	770.446	503.934	810.658	120	123
18	P	G	12.2298	11.6318	40.1949	55.4997	288.469	421.64	328.664	477.139	121	120
18	P	H	8.58811	7.15479	38.1948	46.511	406.545	603.556	444.74	650.067	133	127
18	P	I	10.2835	6.98067	31.5921	33.446	275.619	445.677	307.211	479.123	124	112
18	P	K	13.5278	12.6816	42.5225	64.3773	271.812	443.266	314.334	507.643	113	119
18	P	L	14.3788	11.3582	55.4851	72.521	330.396	565.968	385.881	638.488	137	139
18	P	M	16.1371	14.669	34.7794	43.043	180.745	250.386	215.524	293.429	88	91
18	P	N	13.2893	8.21211	39.189	35.4461	255.702	396.186	294.891	431.632	114	106
18	P	Q	20.3278	12.196	37.5544	30.6769	147.19	220.855	184.744	251.532	86	91
18	P	R	15.0489	10.921	54.2569	61.0818	306.281	498.223	360.538	559.305	148	145
18	P	S	26.0294	21.1362	61.7924	76.2024	175.602	284.328	237.394	360.53	118	110
18	P	T	32.2123	33.1838	55.4237	84.7935	116.634	170.733	172.057	255.526	100	97
18	P	V	18.4637	14.7731	55.8038	61.7339	246.432	356.146	302.236	417.88	126	129
18	P	W	6.55694	5.38248	37.0895	49.5345	528.562	870.756	565.652	920.291	150	159
18	P	Y	6.97189	4.96444	31.3816	37.5749	418.734	719.305	450.116	756.88	114	120
19	K	A	85.367	76.4312	159.791	231.947	27.3902	71.5245	187.181	303.471	97	106
19	K	C	71.3541	70.6337	147.948	211.232	59.3955	87.821	207.344	299.053	119	108
19	K	D	82.215	77.5967	128.655	176.657	27.831	51.0035	156.486	227.661	91	104
19	K	E	78.1019	78.6101	103.479	163.806	29.0132	44.5717	132.492	208.378	87	82
19	K	F	76.1841	68.4352	148.978	216.671	46.572	99.9365	195.55	316.608	118	123
19	K	G	79.3785	72.8662	124.175	187.465	32.2591	69.808	156.435	257.273	102	101
19	K	H	74.4826	75.4748	188.526	266.811	64.5884	86.6989	253.115	353.51	126	133
19	K	I	73.6856	66.3947	217.694	290.786	77.7425	147.18	295.437	437.965	128	130
19	K	L	82.9161	75.4209	107.847	153.317	22.2207	49.9649	130.068	203.282	88	94
19	K	M	74.4055	71.6469	123.953	181.009	42.6382	71.6313	166.591	252.64	89	89
19	K	N	76.7961	70.0228	143.902	189.974	43.4797	81.3291	187.381	271.303	111	116
19	K	P	82.0682	81.4661	143.422	211.256	31.3374	48.0614	174.759	259.317	117	110
19	K	Q	81.5219	75.5722	219.493	332.068	49.7512	107.337	269.244	439.405	163	171
19	K	R	81.4573	79.5959	131.591	191.968	29.9549	49.2102	161.546	241.178	99	112
19	K	S	85.4154	76.0539	104.321	135.612	17.8127	42.6983	122.133	178.31	76	72
19	K	T	79.34	77.2712	146.314	206.571	38.0998	60.7614	184.414	267.333	97	94
19	K	V	79.775	77.8215	139.545	187.015	35.3782	53.2977	174.923	240.312	102	99
19	K	W	75.8036	71.5492	102.549	135.346	32.7333	53.8187	135.282	189.164	99	102
19	K	Y	77.2266	64.0726	171.666	233.16	50.6228	130.74	222.289	363.9	108	113
20	T	A	65.1459	57.061	135.234	168.692	72.3526	126.943	207.587	295.635	114	120
20	T	C	50.8978	48.1557	104.976	135.533	101.272	145.914	206.248	281.447	108	106
20	T	D	74.0132	66.3666	132.509	184.915	46.5253	93.7118	179.034	278.627	104	105
20	T	E	67.4752	63.58	130.135	170.476	62.7283	97.6523	192.863	268.128	93	93
20	T	F	63.5296	53.1711	100.73	129.275	57.826	113.855	158.556	243.13	89	89
20	T	G	54.713	46.1266	72.097	83.2788	59.6761	97.265	131.773	180.544	76	86
20	T	H	51.0833	47.6764	114.929	150.171	110.055	164.809	224.984	314.98	126	123
20	T	I	68.9194	60.7339	123.716	161.139	55.7923	104.181	179.509	265.32	98	101
20	T	K	48.0849	44.8645	67.126	92.9254	72.4729	114.199	139.599	207.125	97	90
20	T	L	63.467	50.7389	92.1622	108.28	53.0506	105.126	145.213	213.406	104	104
20	T	M	52.3231	44.2358	82.46	100.628	75.1377	126.853	157.598	227.48	104	100
20	T	N	65.8533	61.0135	119.093	167.166	61.7532	106.816	180.847	273.982	100	104
20	T	P	28.8598	24.0754	53.871	67.7576	132.793	213.682	186.664	281.439	119	121
20	T	Q	64.7487	62.0845	117.438	182.593	63.9372	111.511	181.375	294.104	113	120
20	T	R	57.9085	50.3614	94.5425	129.357	68.7193	127.5	163.262	256.857	93	99
20	T	S	76.3214	74.6542	109.338	152.086	33.9222	51.6347	143.261	203.721	91	89
20	T	V	50.8877	54.1509	90.975	129.983	87.801	110.055	178.776	240.038	82	84
20	T	W	45.1265	42.292	97.9871	122.906	119.152	167.707	217.139	290.614	113	116
20	T	Y	62.8456	55.607	76.6176	109.227	45.2964	87.1999	121.914	196.427	100	105
21	A	C	72.3871	70.6224	119.655	171.347	45.6437	71.2773	165.298	242.625	95	100
21	A	D	80.3168	76.1359	121.699	177.903	29.8247	55.7622	151.523	233.665	78	84
21	A	E	81.514	72.2498	108.496	154.858	24.6051	59.479	133.101	214.337	91	92
21	A	F	66.7474	61.629	80.2377	104.794	39.9733	65.2463	120.211	170.041	82	82
21	A	G	78.5433	71.4392	89.8112	123.19	24.535	49.2503	114.346	172.44	81	80
21	A	H	65.8984	61.1136	186.769	256.714	96.6505	163.346	283.42	420.06	135	143
21	A	I	77.1323	68.305	154.721	215.414	45.8708	99.9566	200.591	315.37	109	113
21	A	K	70.1024	66.7563	128.509	199.313	54.8071	99.2553	183.316	298.569	111	110
21	A	L	75.7862	73.4518	165.54	240.409	52.8903	86.8926	218.43	327.302	126	129
21	A	M	74.7941	69.1734	101.59	145.96	34.2361	65.0459	135.826	211.006	86	89
21	A	N	76.487	73.2227	126.252	189.301	38.8111	69.2269	165.063	258.528	92	106
21	A	P	85.2423	78.8337	189.053	266.977	32.73	71.6814	221.783	338.659	123	118
21	A	Q	82.3113	71.6707	137.153	209.963	29.474	82.9921	166.627	292.955	105	118
21	A	R	75.6882	71.3189	122.117	165.265	39.2252	66.4618	161.342	231.727	101	99
21	A	S	81.5649	72.0604	106.707	158.651	24.1175	61.5128	130.824	220.164	74	83
21	A	T	71.1144	68.9486	114.172	158.788	46.375	71.5111	160.547	230.299	98	106
21	A	V	66.1689	70.1484	137.357	184.877	70.2287	78.6742	207.586	263.551	96	101
21	A	W	62.0128	55.8761	91.7061	132.965	56.1763	104.999	147.882	237.964	102	104
21	A	Y	61.8555	59.9866	82.3665	111.573	50.7931	74.4231	133.16	185.996	90	76
22	C	A	6.47744	5.75894	34.873	48.8093	503.503	798.731	538.376	847.54	100	99
22	C	D	6.85251	5.64086	22.0244	29.7967	299.382	498.434	321.407	528.23	80	82
22	C	E	6.94584	6.77986	30.5511	45.1776	409.297	621.172	439.848	666.35	118	113
22	C	F	5.52052	4.981	25.703	37.5719	439.886	716.734	465.589	754.306	115	114
22	C	G	7.04314	5.70897	30.712	38.1772	405.343	630.546	436.055	668.723	113	108
22	C	H	23.645	17.7312	50.4761	60.804	162.999	282.117	213.475	342.921	120	118
22	C	I	5.57766	4.8305	29.4049	41.9435	497.786	826.362	527.191	868.305	141	136
22	C	K	6.47301	5.22028	37.3117	48.0724	539.108	872.807	576.42	920.879	143	143
22	C	L	6.03156	4.86703	26.1533	37.3175	407.454	729.424	433.607	766.741	116	111
22	C	M	5.76478	5.28276	34.1244	51.558	557.823	924.408	591.947	975.966	122	128
22	C	N	5.88919	5.08615	29.0072	39.8908	463.543	744.411	492.55	784.302	107	111
22	C	P	6.05529	4.68153	26.627	31.4576	413.104	640.494	439.731	671.952	110	123
22	C	Q	6.61479	4.60642	23.7146	26.165	334.794	541.847	358.508	568.012	117	106
22	C	R	5.46747	4.39828	30.5453	38.3264	528.128	833.067	558.673	871.394	121	123
22	C	S	5.18681	5.27795	25.5802	41.9318	467.597	752.54	493.177	794.471	116	127
22	C	T	6.50484	5.37272	31.7617	41.2008	456.517	725.65	488.279	766.851	129	136
22	C	V	5.4949	4.60369	33.3524	45.7448	573.618	947.911	606.971	993.656	135	136
22	C	W	6.19273	4.92078	29.247	37.1772	443.032	718.337	472.279	755.514	119	138
22	C	Y	5.2849	4.87966	26.589	40.9318	476.524	797.893	503.113	838.824	132	130
23	T	A	53.3288	45.8834	89.2674	122.164	78.1232	144.084	167.391	266.248	94	89
23	T	C	65.1915	65.131	139.559	186.439	74.5166	99.813	214.076	286.252	109	107
23	T	D	50.3996	40.6581	74.679	96.2414	73.4947	140.468	148.174	236.709	107	105
23	T	E	53.4411	45.6597	94.0103	108.227	81.9035	128.803	175.914	237.03	117	110
23	T	F	23.2774	17.1863	65.7575	73.6877	216.737	355.071	282.495	428.759	110	110
23	T	G	68.5088	60.0356	125.146	171.613	57.5255	114.239	182.672	285.853	109	104
23	T	H	37.6373	29.2273	78.3721	89.1884	129.858	215.966	208.23	305.154	107	106
23	T	I	43.7415	40.1359	91.7587	107.952	118.016	161.015	209.775	268.968	116	117
23	T	K	62.295	58.9127	108.83	146.147	65.8708	101.927	174.7	248.074	86	87
23	T	L	53.5134	45.8361	84.7116	100.736	73.5882	119.038	158.3	219.774	98	93
23	T	M	50.0202	43.24	68.6611	75.1527	68.6058	98.6508	137.267	173.804	85	81
23	T	N	78.6393	79.064	100.321	158.902	27.25	42.0771	127.57	200.979	82	78
23	T	P	61.7667	58.3215	104.619	142.796	64.7587	102.047	169.378	244.843	104	107
23	T	Q	46.7826	44.596	74.3427	91.4137	84.5684	113.568	158.911	204.982	105	99
23	T	R	61.134	56.225	98.7415	138.053	62.7751	107.484	161.517	245.537	104	102
23	T	S	82.4843	77.01	135.024	197.325	28.6726	58.908	163.696	256.233	99	107
23	T	V	55.8589	45.2318	122.012	143.978	96.4167	174.333	218.428	318.31	118	119
23	T	W	25.9617	23.7467	72.5356	91.7295	206.859	294.553	279.395	386.283	129	125
23	T	Y	30.1562	23.2337	57.9413	74.4596	134.196	246.021	192.137	320.481	103	105
24	N	A	78.2706	75.237	128.854	167.879	35.7722	55.2546	164.626	223.134	93	95
24	N	C	66.4447	60.3219	117.877	163.019	59.5291	107.23	177.406	270.249	108	102
24	N	D	55.6067	48.3605	80.3634	98.7854	64.1576	105.483	144.521	204.269	107	100
24	N	E	64.5485	58.1408	107.549	134.392	59.0683	96.7574	166.617	231.15	109	109
24	N	F	55.6996	49.8487	114.701	155.025	91.2272	155.966	205.929	310.991	118	119
24	N	G	71.8191	69.5741	118.859	168.593	46.6388	73.7285	165.498	242.321	90	94
24	N	H	74.9762	68.0439	178.991	240.774	59.7395	113.077	238.73	353.852	114	110
24	N	I	55.8395	54.418	113.935	153.428	90.1052	128.516	204.04	281.944	94	107
24	N	K	79.0039	72.0695	131.638	182.763	34.9841	70.8298	166.622	253.593	88	98
24	N	L	48.7184	38.3846	74.8339	99.455	78.7711	159.646	153.605	259.101	102	96
24	N	M	66.8712	60.5721	128.594	165.376	63.7068	107.647	192.301	273.024	107	109
24	N	P	83.145	80.1792	110.339	161.943	22.3677	40.0334	132.706	201.977	84	90
24	N	Q	74.7507	68.5525	138.717	194.193	46.8559	89.0833	185.573	283.277	109	112
24	N	R	83.2334	74.5477	132.059	188.167	26.6021	64.2444	158.661	252.411	111	116
24	N	S	86.738	76.9976	147.56	200.843	22.5614	60	170.121	260.843	84	90
24	N	T	82.0387	71.6477	163.955	221.168	35.8958	87.5204	199.851	308.689	112	118
24	N	V	70.0344	69.6284	154.036	207.092	65.9075	90.3323	219.944	297.424	122	133
24	N	W	34.2654	31.9491	72.1613	99.6421	138.434	212.236	210.595	311.878	117	111
24	N	Y	49.3286	43.0302	74.9509	85.583	76.9911	113.308	151.942	198.891	88	85
25	C	A	6.93876	5.66623	42.9933	55.6605	576.617	926.659	619.61	982.319	137	126
25	C	D	5.75491	5.97916	24.0713	39.9142	394.203	627.641	418.274	667.555	106	108
25	C	E	4.52984	5.18385	22.001	40.3118	463.69	737.332	485.691	777.643	127	125
25	C	F	5.50285	4.5397	23.966	33.2121	411.554	698.38	435.52	731.592	107	115
25	C	G	6.06711	4.65916	33.2472	39.1597	514.744	801.329	547.991	840.489	147	139
25	C	H	5.70516	4.97306	22.3607	32.7033	369.577	624.906	391.938	657.609	94	101
25	C	I	5.79289	4.96838	24.5362	33.4665	399.021	640.123	423.558	673.59	99	102
25	C	K	5.52969	5.00732	28.0715	40.5633	479.579	769.517	507.651	810.081	112	112
25	C	L	4.98499	4.96868	30.5628	47.1894	582.535	902.548	613.097	949.737	107	111
25	C	M	4.75729	3.90723	19.65	26.2995	393.401	646.799	413.051	673.099	116	109
25	C	N	5.89154	5.16308	31.2646	41.2739	499.405	758.13	530.67	799.404	123	117
25	C	P	5.46573	5.4569	32.5015	49.2655	562.141	853.545	594.642	902.81	142	128
25	C	Q	6.69854	4.19039	31.6448	30.6564	440.768	700.932	472.413	731.588	134	128
25	C	R	5.60795	4.90039	31.1857	45.4846	524.912	882.698	556.098	928.183	145	136
25	C	S	5.45076	3.92126	22.5976	27.0539	391.979	662.875	414.576	689.929	128	129
25	C	T	6.2165	5.24024	33.3524	47.0987	503.162	851.691	536.515	898.79	112	115
25	C	V	5.39172	4.46537	30.6389	41.6277	537.619	890.606	568.258	932.234	138	137
25	C	W	5.89811	4.13725	25.3521	30.7383	404.481	712.226	429.834	742.964	119	122
25	C	Y	5.62013	4.93205	31.6506	44.2126	531.514	852.222	563.165	896.435	171	182
26	Y	A	25.6905	17.8987	56.8097	61.7164	164.321	283.092	221.131	344.809	125	125
26	Y	C	50.5974	40.8844	97.066	120.102	94.7737	173.658	191.84	293.76	115	118
26	Y	D	11.5044	8.86317	45.9495	53.8096	353.458	553.304	399.407	607.114	155	144
26	Y	E	9.7523	9.95451	30.905	44.9933	285.994	406.996	316.899	451.989	165	149
26	Y	F	83.0267	78.9908	155.937	232.783	31.8784	61.9135	187.816	294.696	119	123
26	Y	G	15.8917	13.6968	30.4342	45.7741	161.075	288.422	191.509	334.196	117	123
26	Y	H	65.1196	60.7161	109.005	149.174	58.387	96.5169	167.392	245.691	88	88
26	Y	I	20.9344	14.0952	50.5228	60.0087	190.816	365.73	241.339	425.739	126	121
26	Y	K	30.1935	22.9036	69.6963	80.8196	161.135	272.049	230.832	352.868	120	120
26	Y	L	39.6498	37.7539	97.9929	123.813	149.153	204.134	247.146	327.947	129	131
26	Y	M	66.6914	62.7473	138.006	191.606	68.9264	113.755	206.933	305.361	128	118
26	Y	N	25.3824	23.2254	52.9148	63.196	155.555	208.903	208.47	272.099	108	105
26	Y	P	32.854	26.9809	74.0678	81.7465	151.378	221.232	225.445	302.979	136	127
26	Y	Q	45.327	40.364	92.6096	122.102	111.705	180.401	204.314	302.503	137	133
26	Y	R	40.2093	33.8489	72.3952	77.0212	107.651	150.523	180.046	227.544	118	117
26	Y	S	21.631	17.5593	32.8378	45.9729	118.971	215.842	151.809	261.815	96	94
26	Y	T	16.7517	12.3374	29.5511	35.9257	146.856	255.268	176.407	291.194	91	93
26	Y	V	32.7679	32.9868	72.1905	95.2267	148.118	193.455	220.309	288.681	142	138
26	Y	W	84.3328	78.2333	151.533	217.703	28.1516	60.571	179.685	278.274	120	126
27	C	A	6.04709	5.37272	30.9488	43.5693	480.848	767.367	511.797	810.936	130	119
27	C	D	6.45861	4.23151	27.4106	27.4106	396.994	620.364	424.405	647.775	123	120
27	C	E	5.60291	5.09726	23.3637	36.838	393.628	685.864	416.992	722.702	123	128
27	C	F	5.61621	4.46255	22.0712	27.0802	370.92	579.753	392.991	606.833	104	91
27	C	G	5.91505	5.36948	24.7643	35.0016	393.902	616.861	418.666	651.862	104	108
27	C	H	6.08536	5.69445	25.4807	36.5339	393.241	605.036	418.722	641.57	99	103
27	C	I	6.73893	5.2542	33.9197	42.0371	469.421	758.03	503.34	800.067	122	119
27	C	K	6.16821	4.32453	23.0888	26.9428	351.231	596.079	374.319	623.022	97	102
27	C	L	5.76526	5.22034	35.6508	51.0667	582.722	927.16	618.372	978.226	127	131
27	C	M	5.799	3.85285	23.9953	25.2117	389.788	629.153	413.783	654.365	107	111
27	C	N	5.75696	4.97171	25.4398	34.7619	416.457	664.431	441.897	699.193	95	103
27	C	P	5.93944	4.02271	25.6679	29.3113	406.492	699.335	432.16	728.647	113	116
27	C	Q	5.93294	4.7357	22.9134	27.5802	363.293	554.81	386.206	582.391	117	111
27	C	R	5.60562	4.73691	26.5451	38.9141	446.999	782.595	473.545	821.509	124	130
27	C	S	6.88841	5.59601	26.203	34.8525	354.189	587.958	380.392	622.81	84	88
27	C	T	5.2811	4.49304	23.5918	33.522	423.129	712.566	446.721	746.088	108	114
27	C	V	5.22931	3.8262	24.2351	29.9137	439.212	751.898	463.447	781.812	135	128
27	C	W	5.49675	4.15069	25.8609	30.2646	444.615	698.881	470.476	729.146	129	126
27	C	Y	5.72902	4.9133	35.2473	49.476	579.993	957.505	615.241	1006.98	122	117
28	K	A	60.4261	51.5952	104.449	124.585	68.4054	116.881	172.855	241.466	109	100
28	K	C	61.7881	50.286	87.1211	108.49	53.8788	107.257	141	215.747	93	98
28	K	D	8.69542	7.53992	34.1244	43.6249	358.317	534.961	392.441	578.586	118	110
28	K	E	11.3127	9.34476	33.4226	41.4844	262.02	402.448	295.443	443.932	113	120
28	K	F	28.2839	24.1919	54.9441	64.9855	139.315	203.64	194.259	268.625	90	96
28	K	G	25.9668	21.2799	45.5519	49.6866	129.871	183.804	175.423	233.49	86	87
28	K	H	54.1897	45.4096	86.855	105.119	73.4246	126.372	160.28	231.491	87	91
28	K	I	48.9224	42.8046	118.804	156.551	124.037	209.183	242.841	365.735	121	113
28	K	L	30.7876	22.1759	58.9677	64.2428	132.563	225.453	191.531	289.696	110	114
28	K	M	33.2945	27.816	43.1687	48.5812	86.4885	126.071	129.657	174.652	90	92
28	K	N	20.1056	18.7426	62.5293	77.3194	248.475	335.215	311.005	412.534	106	108
28	K	P	60.3251	50.4525	93.174	114.35	61.279	112.299	154.453	226.65	93	87
28	K	Q	33.9629	23.9034	55.564	55.5816	108.038	176.944	163.602	232.526	112	109
28	K	R	77.4363	69.6102	114.263	146.346	33.2944	63.8905	147.557	210.237	92	93
28	K	S	47.6043	33.8959	67.7751	68.4155	74.5967	133.425	142.372	201.84	81	78
28	K	T	31.3003	26.2362	49.8532	56.6781	109.421	159.352	159.274	216.03	79	79
28	K	V	64.5216	65.8941	105.309	145.492	57.9062	75.3047	163.215	220.797	95	89
28	K	W	43.2108	35.2205	81.4132	100.718	106.996	185.246	188.409	285.964	111	107
28	K	Y	45.1135	37.3421	46.3355	46.2127	56.3733	77.5421	102.709	123.755	63	59
29	K	A	81.1562	78.6131	109.795	166.008	25.4934	45.1628	135.288	211.171	64	72
29	K	C	79.6414	77.4403	141.48	193.5	36.1663	56.37	177.647	249.87	82	83
29	K	D	45.1487	39.3475	63.2486	80.7406	76.8409	124.458	140.089	205.199	78	75
29	K	E	78.9624	73.4769	105.514	167.411	28.1115	60.4308	133.625	227.842	97	94
29	K	F	79.9805	79.916	151.96	230.467	38.0364	57.9195	189.997	288.387	88	84
29	K	G	79.951	77.9859	169.739	216.8	42.5647	61.1989	212.304	277.999	98	99
29	K	H	73.5801	68.6945	121.734	168.438	43.7101	76.7607	165.444	245.198	68	72
29	K	I	76.0179	70.0275	127.532	171.736	40.2338	73.5047	167.766	245.241	86	83
29	K	L	72.1267	63.9622	136.594	189.921	52.7868	107.006	189.381	296.927	90	91
29	K	M	81.9891	69.9903	104.619	158.604	22.9821	68.0047	127.601	226.609	74	74
29	K	N	70.4815	67.1986	124.006	171.254	51.9352	83.5932	175.941	254.847	93	96
29	K	P	31.5674	25.0387	50.3825	54.3359	109.22	162.672	159.603	217.007	66	68
29	K	Q	76.4863	75.2673	80.688	119.392	24.8055	39.2319	105.493	158.624	59	68
29	K	R	79.5595	77.5285	116.163	173.166	29.8447	50.192	146.008	223.358	70	73
29	K	S	82.5355	75.1653	124.33	184.509	26.3082	60.9618	150.639	245.47	70	74
29	K	T	69.4009	67.8475	93.9342	145.489	41.4159	68.9464	135.35	214.436	65	69
29	K	V	81.5089	75.4006	117.777	182.342	26.719	59.4891	144.496	241.831	77	85
29	K	W	81.2683	74.4856	140.349	210.668	32.3493	72.1623	172.698	282.83	97	94
29	K	Y	79.0406	71.659	124.26	165.183	32.9504	65.3298	157.211	230.513	84	80
30	C	A	7.20111	4.90238	33.0133	36.2356	425.433	702.909	458.446	739.144	110	103
30	C	D	9.09719	6.67676	30.3172	33.487	302.942	468.058	333.259	501.545	95	100
30	C	E	7.39973	5.60883	23.8549	28.9897	298.521	487.868	322.375	516.857	120	110
30	C	F	5.79496	5.29909	25.2117	37.5807	409.851	671.611	435.063	709.192	107	110
30	C	G	6.50264	4.70621	28.4838	33.6419	409.551	681.199	438.035	714.841	127	121
30	C	H	12.0291	10.5449	45.0197	58.2016	329.237	493.738	374.257	551.94	87	92
30	C	I	6.37444	5.22927	29.8084	36.183	437.816	655.749	467.624	691.932	106	94
30	C	K	5.24244	5.01157	19.4395	27.1007	351.371	513.662	370.81	540.762	98	99
30	C	L	5.63085	3.9102	24.8959	28.6212	417.238	703.343	442.134	731.964	98	100
30	C	M	5.05416	4.80545	23.7847	37.1304	446.812	735.542	470.597	772.672	108	113
30	C	N	6.0266	4.95648	23.6619	34.1946	368.963	655.702	392.625	689.897	88	92
30	C	P	5.91745	5.77274	16.6616	26.6562	264.906	435.104	281.567	461.761	81	78
30	C	Q	6.55006	5.40253	17.3692	23.5274	247.808	411.962	265.177	435.489	81	80
30	C	R	6.06515	5.04464	27.2995	33.4928	422.805	630.436	450.105	663.929	106	108
30	C	S	5.92247	5.3518	24.3433	36.5017	386.689	645.543	411.032	682.045	106	97
30	C	T	5.98088	5.38208	28.4692	41.6569	447.534	732.336	476.003	773.993	93	96
30	C	V	5.26004	4.00954	26.779	31.7442	482.324	759.973	509.103	791.717	116	113
30	C	W	5.53819	4.93976	22.4221	30.7383	382.441	591.524	404.863	622.263	114	118
30	C	Y	6.00896	4.4968	28.054	32.8787	438.814	698.28	466.868	731.159	118	113
31	C	A	75.4193	66.6107	151.726	205.58	49.4507	103.049	201.177	308.629	107	99
31	C	D	7.25872	7.19242	32.6156	48.9321	416.714	631.397	449.329	680.33	125	125
31	C	E	6.24058	4.36558	23.235	26.0773	349.087	571.261	372.322	597.338	102	100
31	C	F	9.48348	7.85075	30.9137	39.1597	295.061	459.643	325.975	498.802	105	114
31	C	G	29.7743	24.9684	48.1251	57.3887	113.508	172.456	161.633	229.845	103	100
31	C	H	7.72901	5.49331	31.5717	36.3175	376.911	624.805	408.483	661.123	107	97
31	C	I	29.8147	26.9026	50.9761	67.6699	120	183.867	170.976	251.537	101	98
31	C	K	7.74972	5.55501	25.276	29.7032	300.878	505.006	326.154	534.709	99	102
31	C	L	17.9417	11.5354	44.0372	43.3003	201.409	332.069	245.446	375.369	121	118
31	C	M	31.4836	25.4768	52.9616	61.9795	115.258	181.299	168.22	243.279	94	87
31	C	N	14.1667	10.4667	29.7996	32.7121	180.551	279.823	210.351	312.535	87	81
31	C	P	5.77192	4.46356	30.2909	37.8527	494.507	810.185	524.797	848.038	122	121
31	C	Q	9.9926	6.73474	19.7904	22.4163	178.26	310.429	198.051	332.845	95	92
31	C	R	9.21504	6.10374	41.2914	47.2478	406.796	726.832	448.087	774.08	125	124
31	C	S	72.7371	74.5336	103.601	158.569	38.8312	54.1793	142.433	212.748	97	89
31	C	T	40.6629	33.2838	74.4421	84.5566	108.629	169.491	183.071	254.047	101	95
31	C	V	51.2303	49.006	103.098	129.731	98.1466	134.994	201.245	264.725	105	114
31	C	W	11.1531	10.8486	31.984	45.2653	254.787	371.982	286.771	417.247	106	104
31	C	Y	6.97064	5.19276	24.1941	27.9311	322.892	509.955	347.086	537.886	108	103
32	F	A	8.15007	7.46877	18.0535	23.6561	203.46	293.077	221.513	316.733	92	92
32	F	C	20.7457	21.5704	35.6859	55.2307	136.33	200.818	172.016	256.049	89	98
32	F	D	6.55816	5.2454	24.2117	32.4811	344.972	586.749	369.184	619.23	120	121
32	F	E	5.33826	5.74324	19.2348	32.8729	341.085	539.502	360.32	572.375	112	113
32	F	G	10.3866	7.14415	32.9548	36.2473	284.328	471.124	317.283	507.371	108	108
32	F	H	14.342	12.0409	28.1358	33.7618	168.041	246.632	196.177	280.394	82	88
32	F	I	11.2179	8.84063	27.4487	33.0366	217.238	340.654	244.687	373.691	97	96
32	F	K	4.72604	4.21461	14.8253	21.4805	298.868	488.188	313.693	509.669	112	108
32	F	L	58.4545	59.4547	83.1092	109.637	59.0683	74.7671	142.177	184.404	91	90
32	F	M	49.8098	42.3194	63.5819	78.0826	64.0674	106.425	127.649	184.508	83	75
32	F	N	6.40451	5.05586	22.3753	27.0773	326.993	508.485	349.368	535.563	110	94
32	F	P	6.17284	3.79639	16.7025	15.7142	253.879	398.21	270.581	413.924	85	80
32	F	Q	7.23346	7.53947	21.4221	35.0133	274.73	429.387	296.152	464.4	104	99
32	F	R	6.36805	5.37934	27.4399	36.6508	403.46	644.675	430.9	681.326	103	105
32	F	S	6.98343	6.21438	18.0476	23.6444	240.387	356.834	258.435	380.479	89	91
32	F	T	7.98619	5.99618	26.5919	30.5102	306.382	478.317	332.974	508.827	100	96
32	F	V	25.6549	21.4911	53.0288	65.2838	153.672	238.487	206.701	303.771	102	99
32	F	W	77.9847	72.5119	85.9163	115.093	24.2545	43.63	110.171	158.723	69	71
32	F	Y	89.2004	78.1007	134.217	196.474	16.2498	55.091	150.467	251.565	83	87
33	H	A	4.71767	5.08996	18.6909	31.7091	377.499	591.264	396.19	622.973	99	104
33	H	C	6.87584	6.18044	20.7261	30.6564	280.708	465.366	301.434	496.023	95	101
33	H	D	5.45986	4.83826	22.001	32.0015	380.958	629.424	402.959	661.425	125	138
33	H	E	5.64926	4.66297	31.9576	39.3878	533.738	805.306	565.696	844.694	137	144
33	H	F	5.74576	4.94148	33.8612	46.2302	555.465	889.324	589.326	935.554	138	132
33	H	G	5.89154	5.49013	24.8316	33.7501	396.647	580.992	421.479	614.742	118	112
33	H	I	5.62444	5.00873	20.4337	32.2413	342.869	611.461	363.302	643.702	99	96
33	H	K	4.53531	5.55788	17.2903	31.6945	363.947	538.567	381.237	570.262	136	131
33	H	L	5.16213	5.07758	29.2821	46.4583	537.966	868.512	567.248	914.97	159	165
33	H	M	5.88523	4.42737	29.9663	35.8438	479.212	773.752	509.178	809.596	148	151
33	H	N	6.14749	4.32997	30.7032	37.5369	468.739	829.37	499.442	866.907	115	122
33	H	P	4.94978	4.48536	21.194	31.791	406.986	676.981	428.18	708.772	93	109
33	H	Q	6.1579	5.78846	25.4047	41.8616	387.15	681.329	412.554	723.191	133	130
33	H	R	5.46303	5.19591	27.5978	39.344	477.575	717.866	505.173	757.21	133	139
33	H	S	4.42817	5.14581	16.0008	27.4399	345.34	505.807	361.34	533.247	106	109
33	H	T	6.14802	4.53538	23.0245	26.8024	351.478	564.161	374.502	590.963	113	107
33	H	V	5.42322	4.45097	23.8257	32.2471	415.502	692.249	439.327	724.496	131	128
33	H	W	4.34792	3.91316	12.5035	18.4044	275.071	451.915	287.574	470.319	111	110
33	H	Y	5.87708	4.55537	24.4047	27.4399	390.846	574.924	415.251	602.364	97	103
34	C	A	5.1648	4.3099	17.2991	23.0537	317.642	511.848	334.941	534.902	94	94
34	C	D	6.32084	5.15515	26.7556	36.0192	396.537	662.685	423.293	698.704	109	111
34	C	E	5.57173	4.02091	20.9308	24.0362	354.73	573.745	375.661	597.781	89	93
34	C	F	5.94422	4.66821	25.7907	32.2998	408.088	659.609	433.879	691.909	100	113
34	C	G	4.74013	4.25083	18.7202	27.1416	376.21	611.361	394.93	638.502	122	124
34	C	H	6.03796	5.00283	29.9839	39.651	466.605	752.92	496.589	792.571	108	103
34	C	I	5.42812	4.85151	24.7731	35.9754	431.611	705.553	456.384	741.529	100	103
34	C	K	5.63893	4.88859	19.4278	28.4165	325.103	552.867	344.53	581.283	91	92
34	C	L	6.01389	5.30628	30.8202	43.1365	481.663	769.798	512.483	812.934	109	105
34	C	M	5.94856	4.54126	34.563	39.4171	546.468	828.559	581.031	867.976	127	117
34	C	N	5.35008	4.77855	21.8519	31.6682	386.589	631.047	408.441	662.715	92	102
34	C	P	5.78045	4.16319	30.4927	36.335	497.021	836.433	527.514	872.768	124	129
34	C	Q	6.03257	5.25831	26.0422	39.3469	405.65	708.933	431.692	748.28	106	114
34	C	R	5.93496	5.39461	28.9224	43.9494	458.4	770.743	487.323	814.692	123	131
34	C	S	6.17928	4.50397	28.6329	36.914	434.737	782.675	463.37	819.589	120	119
34	C	T	5.88688	4.10436	24.5187	29.8698	391.979	697.889	416.497	727.759	101	106
34	C	V	6.49936	4.44518	31.8728	35.5572	458.527	764.348	490.4	799.905	129	132
34	C	W	4.92723	4.06241	24.8608	35.335	479.699	834.47	504.56	869.805	130	133
34	C	Y	5.9471	5.44217	29.7733	44.2652	470.863	769.11	500.637	813.375	126	126
35	Q	A	38.5931	35.3351	52.0668	70.1378	82.8452	128.355	134.912	198.493	78	76
35	Q	C	69.8199	59.8198	99.1509	125.725	42.8586	84.4481	142.009	210.173	81	84
35	Q	D	6.66003	5.29295	24.8784	30.4313	348.669	544.508	373.548	574.939	106	102
35	Q	E	50.4631	45.0778	91.9429	127.55	90.2555	155.405	182.198	282.955	91	86
35	Q	F	35.4358	30.7842	64.2486	86.3432	117.061	194.136	181.31	280.479	103	111
35	Q	G	16.3415	12.4485	25.1415	26.1474	128.709	183.897	153.851	210.045	76	72
35	Q	H	86.0452	77.7056	109.338	150.428	17.7325	43.1591	127.071	193.587	83	81
35	Q	I	55.0986	56.2036	80.9161	118.006	65.9409	91.9552	146.857	209.961	76	78
35	Q	K	6.47792	5.20468	25.6416	34.0455	370.189	620.087	395.83	654.132	98	96
35	Q	L	46.6161	41.0415	63.8013	75.8895	73.0639	109.02	136.865	184.909	90	85
35	Q	M	81.314	73.992	137.182	183.4	31.5245	64.4648	168.706	247.865	107	106
35	Q	N	46.7471	44.7054	38.4229	53.3534	43.7702	65.991	82.1931	119.344	65	61
35	Q	P	58.9031	55.4364	98.5748	142.586	68.7761	114.62	167.351	257.206	92	91
35	Q	R	6.8814	5.89142	31.3524	41.5195	424.258	663.226	455.61	704.745	110	114
35	Q	S	45.6538	37.4163	40.0545	53.1955	47.6807	88.9764	87.7353	142.172	83	78
35	Q	T	67.6952	67.234	101.847	136.527	48.6024	66.5353	150.449	203.062	88	82
35	Q	V	69.8839	66.4393	109.356	141.159	47.1264	71.304	156.482	212.463	83	83
35	Q	W	9.18146	6.90307	40.4347	47.3882	399.96	639.092	440.395	686.48	121	122
35	Q	Y	74.7768	76.37	103.803	149.621	35.0142	46.2949	138.817	195.916	90	87
36	V	A	69.3037	65.7958	121.734	156.446	53.9188	81.3291	175.653	237.775	89	90
36	V	C	67.9322	68.1784	104.473	142.539	49.3171	66.5286	153.79	209.068	71	73
36	V	D	12.6142	9.81856	38.5544	45.8794	267.09	421.392	305.644	467.272	92	86
36	V	E	13.0215	9.57662	49.2041	54.2569	328.662	512.299	377.867	566.556	129	128
36	V	F	65.8926	56.6306	126.638	164.385	65.5502	125.891	192.188	290.276	96	103
36	V	G	34.5854	32.7807	36.7123	42.4757	69.4373	87.0997	106.15	129.575	61	58
36	V	H	77.8203	75.066	80.4248	114.07	22.922	37.8895	103.347	151.959	60	62
36	V	I	63.4701	53.2773	129.506	166.376	74.5366	145.907	204.043	312.284	103	102
36	V	K	70.7467	64.2649	70.7636	112.953	29.2603	62.8085	100.024	175.761	77	83
36	V	L	80.8692	78.2514	130.182	171.543	30.7965	47.6774	160.978	219.221	85	86
36	V	M	70.5523	60.8618	110.075	139.261	45.9442	89.5542	156.02	228.815	88	92
36	V	N	50.3023	46.8076	71.1846	86.5304	70.3289	98.3336	141.514	184.864	78	71
36	V	P	6.91491	5.89185	32.1068	43.9377	432.206	701.8	464.312	745.738	94	91
36	V	Q	54.708	51.7949	72.9216	102.578	60.3707	95.4683	133.292	198.046	101	99
36	V	R	55.994	47.4573	87.7117	109.526	68.933	121.262	156.645	230.788	80	70
36	V	S	64.9039	58.83	81.9395	102.911	44.3079	72.0187	126.247	174.93	74	71
36	V	T	60.9716	58.1189	130.749	188.816	83.6934	136.063	214.442	324.879	88	90
36	V	W	70.1353	65.6128	77.6879	112.081	33.0806	58.741	110.769	170.822	94	92
36	V	Y	56.565	55.444	122.953	174.681	94.4131	140.377	217.366	315.058	90	87
37	C	A	5.35827	4.51539	11.5093	17.6207	203.286	372.616	214.795	390.237	71	75
37	C	D	6.11195	5.04829	18.381	24.8199	282.358	466.829	300.739	491.649	109	112
37	C	E	4.25623	4.13691	10.4683	16.2639	235.485	376.878	245.953	393.141	98	102
37	C	F	5.67749	5.11181	25.0275	35.4578	415.792	658.187	440.82	693.644	99	101
37	C	G	5.0702	5.58079	13.8778	25.3784	259.836	429.367	273.714	454.745	80	81
37	C	H	5.58155	5.22928	23.3286	34.0776	394.63	617.592	417.959	651.67	87	89
37	C	I	5.32342	5.19051	18.3634	28.937	326.592	528.562	344.955	557.499	97	96
37	C	K	5.73199	4.85127	14.2814	19.9542	234.871	391.364	249.152	411.318	75	78
37	C	L	5.86493	4.16504	29.9722	33.715	481.069	775.762	511.041	809.477	108	116
37	C	M	5.6844	5.26762	17.1002	23.8959	283.727	429.741	300.827	453.637	100	94
37	C	N	5.27767	4.58302	14.2053	20.422	254.954	425.179	269.159	445.601	99	97
37	C	P	6.20255	5.5201	28.978	42.3412	438.217	724.695	467.195	767.036	93	90
37	C	Q	5.87663	4.64951	24.5684	33.0776	393.501	678.344	418.07	711.421	103	100
37	C	R	5.59585	4.28972	24.9485	30.3611	420.892	677.402	445.84	707.763	102	113
37	C	S	5.78623	4.61493	14.7288	19.5711	239.82	404.512	254.548	424.083	79	84
37	C	T	5.67243	5.27249	17.3809	23.0069	289.03	413.351	306.411	436.358	65	69
37	C	V	5.27988	4.4211	22.656	27.9779	406.445	604.849	429.101	632.827	121	108
37	C	W	5.56222	3.6273	13.8252	14.141	234.73	375.709	248.556	389.85	88	90
37	C	Y	4.94146	5.35223	9.80748	16.5885	188.666	293.348	198.473	309.936	68	71
38	F	A	5.67741	5.33592	10.9303	17.3341	181.593	307.524	192.523	324.858	79	77
38	F	C	6.95047	5.70901	20.229	23.545	270.816	388.873	291.045	412.418	82	90
38	F	D	5.71566	4.18383	17.1236	21.9309	282.468	502.251	299.591	524.182	105	99
38	F	E	5.31407	5.01457	15.527	21.9952	276.66	416.63	292.188	438.626	90	91
38	F	G	5.78042	4.27705	10.8163	12.5181	176.303	280.164	187.119	292.682	67	68
38	F	H	6.55716	4.37168	13.0269	13.3954	185.64	293.017	198.667	306.413	74	74
38	F	I	6.97631	5.72962	16.0183	21.0887	213.592	346.976	229.61	368.065	103	106
38	F	K	5.44626	4.01874	12.5678	14.4451	218.193	344.999	230.761	359.444	72	74
38	F	L	12.0408	11.5494	25.9925	36.4579	189.878	279.212	215.871	315.67	93	84
38	F	M	8.85479	6.70939	21.4308	24.6941	220.594	343.359	242.025	368.054	103	99
38	F	N	4.07671	4.49822	14.6323	27.2644	344.291	578.851	358.923	606.116	104	108
38	F	P	5.33252	4.74319	20.6238	30.1067	366.131	604.628	386.755	634.735	95	99
38	F	Q	5.13625	3.53305	11.369	13.2579	209.978	361.997	221.347	375.255	90	93
38	F	R	5.79589	3.06539	11.3397	11.1818	184.311	353.595	195.651	364.777	88	88
38	F	S	5.59673	4.70916	18.0535	23.931	304.518	484.248	322.572	508.179	100	95
38	F	T	5.08581	5.23151	11.9479	17.0271	222.979	308.445	234.927	325.473	92	98
38	F	V	11.5171	11.2774	22.9309	32.9051	176.173	258.875	199.104	291.78	84	79
38	F	W	55.5816	57.3878	51.9498	75.3807	41.5161	55.9726	93.4659	131.353	84	78
38	F	Y	44.6281	42.5524	54.4061	76.1966	67.5037	102.869	121.91	179.065	97	95
39	M	A	69.3829	63.2053	129.725	165.37	57.2449	96.2698	186.97	261.64	104	101
39	M	C	74.1224	68.3639	171.985	245.848	60.0434	113.769	232.028	359.616	101	109
39	M	D	37.5474	36.1392	50.2655	63.3012	83.6066	111.858	133.872	175.16	90	86
39	M	E	48.3545	46.7716	67.8453	82.8285	72.4628	94.2628	140.308	177.091	95	93
39	M	F	41.9359	33.6153	121.146	130.62	167.737	257.953	288.884	388.573	108	99
39	M	G	51.5377	49.1405	69.2021	94.7004	65.0726	98.013	134.275	192.713	82	86
39	M	H	13.8084	12.4034	51.8445	69.5998	323.613	491.534	375.458	561.134	96	100
39	M	I	78.8996	74.6665	223.344	302.067	59.7295	102.488	283.073	404.555	105	109
39	M	K	6.85002	4.51314	21.1764	22.2116	287.968	469.941	309.144	492.153	104	100
39	M	L	86.2533	76.7858	148.726	208.834	23.7035	63.1357	172.43	271.97	85	95
39	M	N	59.2595	50.846	96.2501	124.576	66.1713	120.431	162.421	245.007	92	92
39	M	P	7.83094	6.16911	49.1953	60.5993	579.021	921.703	628.217	982.302	115	114
39	M	Q	37.7517	32.0839	87.1094	115.909	143.633	245.36	230.743	361.269	107	101
39	M	R	6.23615	4.86095	32.6507	37.993	490.92	743.603	523.571	781.596	131	132
39	M	S	78.5416	72.1143	152.726	211.799	41.7265	81.9001	194.453	293.7	80	78
39	M	T	76.8693	77.4807	182.649	265.346	54.9608	77.1214	237.61	342.467	104	95
39	M	V	79.6674	75.1535	105.672	157.271	26.9694	51.9953	132.641	209.266	99	106
39	M	W	6.06323	5.58621	19.8869	31.4488	308.105	531.524	327.992	562.973	116	112
39	M	Y	16.2628	17.2366	57.7922	85.6005	297.572	411.02	355.364	496.621	113	110
40	T	A	79.3491	69.1625	160.753	227.344	41.8367	101.366	202.59	328.71	86	90
40	T	C	68.5845	64.6187	129.392	171.382	59.2686	93.8387	188.661	265.221	79	78
40	T	D	55.4965	44.7717	75.758	94.367	60.7514	116.407	136.509	210.774	67	69
40	T	E	71.4306	59.8021	121.017	155.183	48.4021	104.311	169.419	259.494	69	81
40	T	F	56.4122	48.8263	85.273	111.169	65.8874	116.514	151.16	227.683	85	83
40	T	G	66.4193	59.9368	127.386	169.365	64.4047	113.208	191.791	282.572	104	95
40	T	H	68.8738	63.2494	135.638	180.605	61.299	104.939	196.937	285.544	77	80
40	T	I	61.3049	67.2158	58.4413	87.5217	36.8876	42.6883	95.329	130.21	78	71
40	T	K	80.35	84.9175	115.032	176.605	28.1316	31.3675	143.163	207.972	90	97
40	T	L	70.9532	64.7284	95.1799	128.193	38.9648	69.8547	134.145	198.048	65	63
40	T	M	80.0423	76.1798	43.5547	45.625	10.8599	14.2662	54.4146	59.8911	64	60
40	T	N	77.6458	71.9371	57.6606	85.0566	16.6004	33.1808	74.261	118.237	50	50
40	T	P	6.40779	4.83021	33.4489	40.5809	488.556	799.566	522.005	840.147	74	83
40	T	Q	83.3102	76.3733	195.033	253.029	39.0716	78.2768	234.104	331.306	90	91
40	T	R	81.038	74.3046	172.318	231.9	40.3206	80.1937	212.639	312.093	85	85
40	T	S	79.7368	77.299	114.76	148.735	29.1635	43.6801	143.923	192.415	70	69
40	T	V	76.1938	73.9765	92.4956	140.896	28.8996	49.5642	121.395	190.46	80	85
40	T	W	71.5551	70.4834	98.993	134.767	39.3521	56.4368	138.345	191.203	72	75
40	T	Y	57.0735	49.6615	90.9049	118.643	68.372	120.26	159.277	238.903	90	96
41	K	A	6.75126	6.0394	64.6288	90.6066	892.656	1409.65	957.285	1500.26	154	162
41	K	C	6.86202	5.87612	36.9199	46.8852	501.112	751.01	538.032	797.895	120	122
41	K	D	5.82114	4.7429	40.2914	56.1342	651.865	1127.41	692.156	1183.54	131	130
41	K	E	7.48522	5.02433	68.626	75.3457	848.195	1424.27	916.821	1499.62	151	169
41	K	F	5.60775	5.16257	32.9314	50.593	554.316	929.404	587.248	979.997	136	131
41	K	G	6.56205	5.37355	31.9547	44.2769	455.007	779.703	486.962	823.98	132	126
41	K	H	8.05236	6.54311	53.4762	71.7314	610.629	1024.56	664.106	1096.29	131	130
41	K	I	6.75986	5.70688	32.7472	44.581	451.688	736.6	484.435	781.181	117	116
41	K	L	6.33013	5.70183	49.9673	72.2724	739.389	1195.26	789.356	1267.53	140	138
41	K	M	6.1272	5.56861	37.9053	54.2131	580.735	919.335	618.64	973.548	119	118
41	K	N	5.57862	5.07935	28.4399	38.2474	481.362	714.75	509.802	752.998	126	121
41	K	P	5.6211	5.21838	43.4874	68.7401	730.159	1248.53	773.646	1317.27	149	147
41	K	Q	5.99867	5.46073	40.0808	57.915	628.081	1002.66	668.162	1060.57	135	140
41	K	R	18.4338	15.905	78.7522	93.9927	348.465	496.971	427.218	590.964	128	119
41	K	S	6.31102	5.71322	40.6686	57.7308	603.737	952.747	644.405	1010.48	124	120
41	K	T	6.99796	4.82493	49.9234	55.9851	663.476	1104.34	713.4	1160.33	145	148
41	K	V	5.97867	5.64063	49.0432	74.2023	771.261	1241.3	820.304	1315.5	141	133
41	K	W	6.50063	4.37166	50.9205	56.5231	732.396	1236.42	783.316	1292.94	156	152
41	K	Y	6.41741	5.50106	41.7564	62.9942	608.916	1082.13	650.673	1145.13	159	153
42	A	C	32.8334	27.5365	49.9234	63.4328	102.127	166.926	152.051	230.359	85	90
42	A	D	6.04279	4.38422	18.4921	23.0713	287.527	503.162	306.019	526.234	112	127
42	A	E	9.63067	7.06574	35.8701	38.3351	336.587	504.214	372.457	542.549	101	93
42	A	F	17.6027	12.5488	26.0275	28.861	121.833	201.129	147.861	229.99	84	80
42	A	G	83.0011	75.6648	150.077	225.151	30.7363	72.4127	180.814	297.564	105	103
42	A	H	7.74004	6.67017	14.3428	20.0623	170.963	280.715	185.306	300.777	75	74
42	A	I	9.59843	8.59885	18.0798	24.1678	170.282	256.891	188.362	281.059	98	102
42	A	K	10.224	7.82185	26.0831	32.3582	229.033	381.332	255.116	413.691	95	100
42	A	L	23.6256	16.1286	26.7615	27.5919	86.5119	143.483	113.273	171.075	77	81
42	A	M	15.5868	13.8343	22.2467	33.253	120.481	207.113	142.728	240.366	91	89
42	A	N	9.43302	8.09994	14.4217	16.9131	138.464	191.892	152.886	208.805	84	86
42	A	P	5.27977	4.97518	20.615	33.2121	369.838	634.343	390.453	667.555	104	116
42	A	Q	8.10703	8.65775	10.79	17.9014	122.304	188.866	133.094	206.768	73	80
42	A	R	7.30819	5.86398	27.8025	34.68	352.626	556.727	380.429	591.407	115	117
42	A	S	22.405	16.5007	37.4667	39.0194	129.758	197.452	167.225	236.471	85	82
42	A	T	8.45312	8.68244	10.3163	16.4218	111.725	172.717	122.041	189.138	83	81
42	A	V	14.7051	10.1956	61.7924	65.082	358.417	573.251	420.209	638.333	107	98
42	A	W	16.2098	12.3979	58.7688	70.0501	303.784	494.967	362.552	565.017	117	119
42	A	Y	16.968	15.7267	19.8957	26.7556	97.3585	143.373	117.254	170.128	75	82
43	L	A	12.9552	12.9505	10.4683	16.375	70.3356	110.068	80.8039	126.443	78	70
43	L	C	60.5316	51.7154	20.2817	26.01	13.2242	24.2845	33.5059	50.2945	56	54
43	L	D	4.76955	3.72183	7.4214	9.65543	148.178	249.771	155.6	259.427	101	92
43	L	E	6.38394	4.65005	23.0186	28.3581	337.552	581.486	360.571	609.844	102	99
43	L	F	41.0407	42.4337	8.29864	11.2988	11.9219	15.3281	20.2205	26.6269	43	42
43	L	G	5.00371	4.97797	12.5795	19.3518	238.824	369.397	251.404	388.749	87	81
43	L	H	4.00826	6.58501	4.66689	11.4567	111.765	162.525	116.432	173.981	82	72
43	L	I	77.6799	70.4814	30.1944	30.7383	8.6759	12.8736	38.8703	43.6119	68	60
43	L	K	5.11927	3.74989	11.1409	13.7375	206.485	352.606	217.626	366.344	95	102
43	L	M	71.5549	76.1791	82.0565	121.33	32.6198	37.9395	114.676	159.27	79	81
43	L	N	5.95741	4.99367	5.56751	8.50917	87.8878	161.89	93.4553	170.399	84	85
43	L	P	3.85866	2.96844	4.37448	5.62015	108.993	183.71	113.368	189.33	79	79
43	L	Q	7.43205	6.11578	34.5806	46.2829	430.71	710.496	465.29	756.779	122	135
43	L	R	4.60968	5.64849	5.71372	9.86011	118.237	164.702	123.95	174.562	83	73
43	L	S	6.05376	5.95412	21.7613	34.177	337.706	539.83	359.467	574.007	101	101
43	L	T	6.69408	7.32531	6.33363	11.7257	88.2818	148.345	94.6155	160.071	84	85
43	L	V	50.753	43.5324	27.0715	30.2295	26.2682	39.2119	53.3396	69.4414	74	63
43	L	W	16.0254	14.4628	18.1149	24.4485	94.924	144.595	113.039	169.044	100	96
43	L	Y	9.98186	7.7492	3.56157	6.22836	32.1189	74.1459	35.6805	80.3743	59	59
44	G	A	36.0846	29.698	46.3004	50.8445	82.0103	120.361	128.311	171.205	90	85
44	G	C	52.5649	55.1301	13.2111	18.5623	11.9219	15.1077	25.133	33.67	41	41
44	G	D	28.1344	21.4632	49.3707	52.1954	126.111	190.99	175.482	243.186	108	102
44	G	E	28.7826	23.2667	80.6266	98.6011	199.496	325.186	280.122	423.787	109	100
44	G	F	15.507	7.57673	6.35995	5.44762	34.6535	66.4518	41.0135	71.8994	56	53
44	G	H	15.3596	15.4895	6.67575	8.00038	36.7874	43.65	43.4632	51.6504	49	50
44	G	I	7.92961	7.91592	7.36	8.86884	85.4567	103.169	92.8167	112.038	94	83
44	G	K	30.8363	29.9273	35.3876	47.6338	79.3722	111.531	114.76	159.165	100	87
44	G	L	41.0431	40.7169	16.8546	20.8489	24.211	30.3556	41.0656	51.2046	77	68
44	G	M	48.0448	38.149	18.8313	18.9249	20.364	30.6829	39.1953	49.6078	79	77
44	G	N	59.8332	50.8988	21.0273	27.396	14.1159	26.4284	35.1432	53.8245	64	60
44	G	P	6.69416	4.63341	6.55294	6.63189	91.3374	136.5	97.8904	143.132	72	63
44	G	Q	50.8802	44.9266	52.406	62.4766	50.5927	76.5871	102.999	139.064	94	90
44	G	R	50.7409	40.0579	23.3432	25.6152	22.6615	38.3303	46.0047	63.9455	77	77
44	G	S	33.7637	29.6592	51.0375	62.9328	100.124	149.254	151.161	212.186	88	86
44	G	T	13.5495	7.30231	11.676	8.50917	74.4966	108.018	86.1726	116.527	80	87
44	G	V	12.6249	8.82949	39.7212	42.9757	274.904	443.753	314.625	486.729	128	121
44	G	W	10.3247	6.0176	6.00028	6.64944	52.1155	103.85	58.1158	110.5	71	78
44	G	Y	13.5579	13.266	8.26355	11.8953	52.6866	77.7726	60.9501	89.6679	77	79
45	I	A	12.8057	9.81467	37.107	42.3529	252.663	389.173	289.77	431.526	88	87
45	I	C	39.5672	35.9458	72.8806	89.127	111.314	158.821	184.195	247.948	76	76
45	I	D	6.59989	5.20624	38.0544	50.169	538.537	913.465	576.592	963.634	93	87
45	I	E	6.45427	5.671	33.7443	46.0373	489.077	765.764	522.821	811.801	94	97
45	I	F	17.3148	13.5594	23.8783	27.5802	114.029	175.822	137.907	203.403	54	62
45	I	G	7.97837	5.9652	32.484	37.3263	374.667	588.409	407.151	625.735	74	69
45	I	H	10.5688	7.57466	40.0282	45.7127	338.711	557.783	378.739	603.495	91	94
45	I	K	11.6949	10.1308	22.8344	30.7646	172.416	272.91	195.25	303.675	69	69
45	I	L	67.9677	56.9945	115.067	139.357	54.2294	105.153	169.296	244.51	84	85
45	I	M	36.423	30.4456	76.8633	85.0742	134.166	194.356	211.029	279.43	90	82
45	I	N	10.132	9.16157	35.4754	50.8094	314.657	503.784	350.132	554.593	108	105
45	I	P	7.02143	5.60744	37.6158	48.2479	498.113	812.179	535.729	860.427	107	106
45	I	Q	13.8642	12.2953	51.1311	70.3016	317.669	501.473	368.8	571.774	100	90
45	I	R	15.0728	11.0984	58.1899	68.4477	327.868	548.285	386.058	616.733	112	106
45	I	S	10.1145	7.30035	29.5453	30.1593	262.561	382.962	292.107	413.121	81	76
45	I	T	42.5708	38.7955	88.6708	113.988	119.619	179.83	208.29	293.817	83	88
45	I	V	79.1679	73.0885	96.1712	118.576	25.3064	43.66	121.478	162.236	70	66
45	I	W	6.41121	5.52839	28.9604	38.6509	422.755	660.484	451.715	699.135	95	84
45	I	Y	9.72499	7.76635	34.7473	43.6863	322.551	518.821	357.299	562.507	82	81
46	S	A	83.4589	74.8005	124.146	168.078	24.6051	56.6238	148.751	224.702	78	69
46	S	C	79.9018	74.453	184.009	259.679	46.2848	89.1033	230.294	348.782	83	86
46	S	D	71.9455	71.8079	142.796	194.623	55.6821	76.4101	198.478	271.033	99	101
46	S	E	77.2616	70.1128	166.324	213.431	48.9497	90.9801	215.273	304.411	104	95
46	S	F	76.2955	64.1765	70.8104	104.742	22.0003	58.4672	92.8107	163.209	78	81
46	S	G	78.1729	73.6028	192.211	279.452	53.6684	100.224	245.879	379.675	100	96
46	S	H	79.8459	76.6871	166.78	238.397	42.0972	72.4729	208.877	310.87	83	85
46	S	I	79.0839	69.6866	112.426	143.621	29.7345	62.4745	142.161	206.095	87	84
46	S	K	85.9501	79.201	159.101	223.198	26.0077	58.6141	185.109	281.812	76	77
46	S	L	66.9188	70.767	105.49	143.299	52.1489	59.1952	157.639	202.494	84	89
46	S	M	73.3057	71.1726	115.421	173.225	42.0304	70.162	157.451	243.386	86	88
46	S	N	79.9943	74.7993	133.076	188.228	33.281	63.4163	166.357	251.644	72	76
46	S	P	45.9797	43.6294	106.18	141.2	124.749	182.434	230.929	323.634	87	84
46	S	Q	80.0609	75.8725	184.371	265.182	45.9175	84.3279	230.289	349.51	97	95
46	S	R	83.8036	81.667	222.174	319.003	42.9387	71.6113	265.113	390.615	102	98
46	S	T	82.3772	75.5006	196.5	255.451	42.0371	82.892	238.538	338.343	99	97
46	S	V	81.7058	74.6248	137.305	202.565	30.743	68.8796	168.048	271.445	90	92
46	S	W	71.6942	72.7492	117.663	169.885	46.4552	63.6367	164.119	233.522	76	75
46	S	Y	80.3016	69.5377	152.253	204.361	37.3485	89.5241	189.601	293.885	91	88
47	Y	A	69.3012	58.1161	110.894	136.86	49.1234	98.6341	160.017	235.494	63	61
47	Y	C	69.4889	66.5194	134.208	178.543	58.928	89.8647	193.136	268.408	73	74
47	Y	D	41.4187	39.8731	138.507	173.061	195.899	260.968	334.406	434.029	93	99
47	Y	E	43.4143	37.5766	90.592	107.865	118.076	179.188	208.668	287.053	103	98
47	Y	F	66.5575	54.483	52.4586	72.5385	26.3583	60.6011	78.8169	133.14	60	64
47	Y	G	56.1676	54.9615	134.223	179.342	104.745	146.963	238.968	326.305	92	90
47	Y	H	60.0549	57.6654	104.47	140.243	69.4874	102.959	173.957	243.202	90	94
47	Y	I	70.0341	73.453	98.6362	147.451	42.204	53.291	140.84	200.742	88	83
47	Y	K	64.7862	55.9111	180.447	246.713	98.0798	194.547	278.527	441.26	99	102
47	Y	L	50.6785	47.3383	88.858	110.619	86.4785	123.059	175.337	233.678	72	71
47	Y	M	51.0544	40.3276	106.59	131.837	102.187	195.078	208.777	326.914	87	87
47	Y	N	80.1649	73.5085	163.701	219.528	40.5043	79.115	204.205	298.643	91	85
47	Y	P	56.6513	48.6139	81.4892	105.982	62.3543	112.025	143.844	218.007	80	80
47	Y	Q	55.6868	54.2084	182.614	241.406	145.316	203.924	327.93	445.33	119	119
47	Y	R	56.6328	49.9408	139.621	162.347	106.916	162.732	246.537	325.078	99	101
47	Y	S	68.436	66.0174	179.868	236.093	82.9587	121.529	262.827	357.622	89	81
47	Y	T	72.6403	69.8005	110.935	164.481	41.7833	71.1638	152.718	235.645	84	79
47	Y	V	73.9892	64.0233	175.926	239.59	61.8467	134.633	237.773	374.224	109	108
47	Y	W	38.1619	32.8642	95.9168	120.427	155.425	246.011	251.342	366.438	96	97
48	G	A	79.5771	73.977	206.501	284.399	52.9972	100.043	259.498	384.443	99	96
48	G	C	68.8344	72.3092	44.4758	61.7924	20.1369	23.6634	64.6127	85.4558	72	62
48	G	D	62.8336	58.3479	92.9167	120.076	54.9608	85.7171	147.877	205.793	93	92
48	G	E	79.4967	70.0921	182.061	247.187	46.9561	105.473	229.017	352.66	106	104
48	G	F	77.669	72.6148	81.188	119.462	23.3428	45.0526	104.531	164.514	77	77
48	G	H	78.9659	77.624	140.138	208.422	37.3284	60.0801	177.467	268.502	101	105
48	G	I	79.0494	76.2936	155.814	222.695	41.2957	69.1968	197.11	291.892	92	88
48	G	K	84.201	76.5404	194.6	260.837	36.5136	79.9466	231.113	340.783	87	90
48	G	L	80.0583	79.8666	203.834	296.207	50.7731	74.6702	254.607	370.877	103	102
48	G	M	75.9838	75.6086	203.957	292.166	64.4648	94.2528	268.422	386.419	96	101
48	G	N	77.887	75.1459	137.866	184.044	39.1418	60.8716	177.008	244.915	98	98
48	G	P	80.9745	74.0126	161.56	240.529	37.9596	84.4548	199.52	324.984	92	101
48	G	Q	76.6335	71.7972	162.902	239.672	49.6711	94.1459	212.573	333.818	80	92
48	G	R	80.7133	77.1393	222.879	315.91	53.2576	93.6216	276.137	409.531	90	90
48	G	S	82.0007	76.6204	202.922	304.488	44.5417	92.9103	247.463	397.398	101	102
48	G	T	80.2694	74.112	140.164	195.343	34.4532	68.2351	174.618	263.578	96	97
48	G	V	82.7715	75.0607	261.354	340.665	54.3997	113.187	315.754	453.853	116	112
48	G	W	77.374	73.082	266.644	403.291	77.9729	148.542	344.617	551.833	105	109
48	G	Y	81.1376	78.8366	64.5557	89.9779	15.0075	24.1543	79.5632	114.132	77	77
49	R	A	76.271	72.4149	207.314	275.025	64.4982	104.765	271.812	379.79	116	116
49	R	C	68.5754	64.8154	190.158	269.153	87.1397	146.108	277.298	415.261	123	127
49	R	D	47.4361	42.1043	114.532	125.573	126.913	172.67	241.444	298.243	96	98
49	R	E	55.6735	49.2254	158.885	185.202	126.502	191.03	285.387	376.232	112	124
49	R	F	71.6768	64.2847	176.915	226.654	69.9082	125.924	246.823	352.578	94	90
49	R	G	74.6721	68.7572	163.867	219.905	55.5819	99.9232	219.449	319.828	91	89
49	R	H	70.7445	65.1957	198.588	259.416	82.1239	138.487	280.712	397.903	90	95
49	R	I	77.4948	65.5451	188.632	256.679	54.7804	134.927	243.412	391.606	118	116
49	R	K	82.0499	76.2063	229.52	315.734	50.212	98.5807	279.732	414.315	117	124
49	R	L	66.1538	61.102	199.299	282.355	101.967	179.75	301.266	462.105	100	106
49	R	M	77.9138	63.7785	162.078	213.8	45.9442	121.423	208.022	335.222	111	111
49	R	N	72.663	63.0633	161.587	211.106	60.7914	123.647	222.378	334.753	116	111
49	R	P	74.9712	65.8693	180.254	254.778	60.177	132.015	240.431	386.793	103	101
49	R	Q	83.2425	70.9786	189.509	265.776	38.1499	108.669	227.659	374.445	102	96
49	R	S	72.9549	65.836	211.01	277.697	78.2234	144.104	289.233	421.801	113	111
49	R	T	73.2804	67.6001	168.648	237.976	61.4927	114.059	230.141	352.035	95	106
49	R	V	80.1378	69.3489	189.211	263.977	46.896	116.674	236.107	380.651	122	122
49	R	W	63.0409	58.7533	193.781	280.873	113.608	197.181	307.389	478.054	131	133
49	R	Y	74.9564	65.7438	205.7	286.06	68.726	149.053	274.426	435.113	101	109
50	K	A	58.4729	54.2879	71.5765	105.145	50.8332	88.5356	122.41	193.681	63	67
50	K	C	59.393	55.2715	126.31	161.499	86.3583	130.693	212.668	292.192	126	121
50	K	D	53.4561	52.6509	125.015	146.972	108.85	132.172	233.864	279.144	119	114
50	K	E	39.0596	37.3419	72.5473	95.0396	113.187	159.472	185.735	254.512	109	106
50	K	F	57.0555	54.1312	112.853	160.288	84.9424	135.822	197.796	296.111	116	121
50	K	G	63.4561	61.1497	136.387	176.242	78.544	111.972	214.931	288.214	113	102
50	K	H	70.4785	67.4168	145.323	207.141	60.8716	100.114	206.194	307.255	102	100
50	K	I	54.1897	50.2737	126.331	171.113	106.796	169.25	233.126	340.364	113	115
50	K	L	59.2856	52.1891	135.173	172.227	92.8302	157.779	228.003	330.007	110	109
50	K	M	63.8564	51.501	122.093	145.726	69.1067	137.232	191.2	282.958	107	111
50	K	N	64.8146	59.3373	157.972	210.519	85.7572	144.264	243.73	354.783	121	118
50	K	P	67.7637	60.6324	133.082	187.833	63.3094	121.957	196.392	309.79	93	93
50	K	Q	71.5851	61.0043	148.709	212.677	59.0282	135.949	207.737	348.626	106	112
50	K	R	77.2275	74.515	210.203	303.821	61.9836	103.91	272.187	407.732	115	114
50	K	S	68.497	63.4733	164.113	217.493	75.4784	125.159	239.591	342.652	98	91
50	K	T	67.6452	61.0662	135.875	183.14	64.9891	116.764	200.864	299.904	119	120
50	K	V	65.698	57.2204	125.374	147.858	65.46	110.543	190.834	258.4	113	114
50	K	W	52.8755	52.2648	109.768	147.095	97.8293	134.346	207.598	281.441	112	120
50	K	Y	54.0571	50.6092	118.137	155.297	100.404	151.558	218.541	306.855	114	117
51	K	A	66.8461	65.385	116.187	150.697	57.6256	79.7796	173.812	230.477	64	63
51	K	C	64.5394	58.9428	171.008	222.97	93.9589	155.311	264.967	378.281	92	85
51	K	D	51.7235	45.6405	106.865	126.155	99.7428	150.255	206.608	276.411	105	109
51	K	E	59.5576	48.8169	116.76	145.831	79.2853	152.9	196.045	298.732	103	100
51	K	F	76.5989	74.5796	144.159	201.67	44.0407	68.7393	188.2	270.41	103	100
51	K	G	69.7693	61.5842	129.603	156.364	56.1563	97.5388	185.759	253.903	83	87
51	K	H	75.6366	72.6153	133.366	179.21	42.9588	67.5839	176.325	246.794	75	72
51	K	I	75.5509	71.0413	141.726	188.211	45.8641	76.7206	187.59	264.931	83	74
51	K	L	69.6083	65.0565	158.165	215.615	69.0566	115.812	227.222	331.428	87	89
51	K	M	69.4258	67.0909	218.8	297.172	96.3566	145.767	315.156	442.939	124	123
51	K	N	75.4664	64.9097	149.832	179.5	48.7093	97.0379	198.541	276.538	91	89
51	K	P	60.7429	61.3516	143.896	188.933	92.9971	119.018	236.893	307.951	82	85
51	K	Q	78.0402	72.1345	189.693	248.45	53.3779	95.9759	243.071	344.426	112	109
51	K	R	78.9568	74.7242	145.437	203.948	38.7611	68.9865	184.198	272.935	78	82
51	K	S	68.5961	65.5826	179.596	245.231	82.2207	128.696	261.817	373.927	83	80
51	K	T	72.4912	65.3185	169.411	226.949	64.2879	120.501	233.699	347.45	105	111
51	K	V	78.0797	68.3843	137.138	180.465	38.5006	83.4329	175.639	263.898	94	96
51	K	W	74.6857	71.7478	222.923	292.075	75.5585	115.011	298.481	407.086	103	106
51	K	Y	75.0938	72.4574	168.701	233.274	55.9526	88.6726	224.653	321.947	106	108
52	R	A	69.4442	64.691	155.586	206.384	68.4588	112.647	224.045	319.03	90	96
52	R	C	65.6204	61.5295	126.339	183.307	66.1913	114.61	192.531	297.917	94	96
52	R	D	45.8085	39.6729	89.513	120.392	105.894	183.069	195.407	303.461	85	88
52	R	E	51.0236	47.0617	97.18	117.269	93.281	131.912	190.461	249.18	99	98
52	R	F	70.9217	64.1868	137.258	181.699	56.2765	101.379	193.534	283.078	91	87
52	R	G	69.1816	58.519	198.694	273.451	88.5123	193.835	287.206	467.287	116	116
52	R	H	70.712	70.8537	113.418	165.78	46.9761	68.195	160.394	233.975	81	82
52	R	I	74.2076	68.7269	103.555	126.772	35.9926	57.6857	139.547	184.458	90	93
52	R	K	80.7861	71.5794	136.647	192.974	32.4996	76.6205	169.146	269.594	90	93
52	R	L	75.2281	64.5321	138.673	171.78	45.6637	94.4131	184.337	266.193	101	101
52	R	M	76.4541	64.8295	73.0298	95.0483	22.4912	51.5645	95.521	146.613	67	60
52	R	N	71.0758	58.8789	136.024	175.991	55.3548	122.912	191.379	298.903	90	82
52	R	P	72.7869	71.5907	182.026	250.819	68.0548	99.5325	250.081	350.351	111	109
52	R	Q	77.6981	67.0899	121.672	154.849	34.924	75.9592	156.596	230.809	86	91
52	R	S	74.9543	65.8272	130.182	180.903	43.4997	93.9122	173.681	274.815	99	101
52	R	T	69.8897	64.4628	109.216	159.715	47.0529	88.0481	156.269	247.763	89	92
52	R	V	66.5834	62.3979	197.922	267.276	99.3321	161.065	297.254	428.341	129	123
52	R	W	74.8042	69.7815	156.095	198.08	52.5764	85.7772	208.671	283.857	107	110
52	R	Y	75.5567	66.6061	167.411	216.168	54.1593	108.379	221.571	324.547	97	95
53	R	A	77.8753	69.4848	167.476	237.385	47.5806	104.251	215.056	341.637	102	104
53	R	C	78.5936	71.6175	129.401	194.044	35.2446	76.901	164.645	270.945	75	80
53	R	D	35.5626	28.5521	77.8458	91.3318	141.052	228.546	218.898	319.877	114	107
53	R	E	29.9859	26.5961	45.5986	60.9268	106.469	168.155	152.067	229.082	80	85
53	R	F	66.7174	55.9811	97.6011	128.725	48.6893	101.219	146.29	229.944	86	82
53	R	G	80.4985	74.2515	176.622	251.257	42.7884	87.1297	219.411	338.387	94	97
53	R	H	75.0134	70.3465	151.586	209.747	50.4926	88.4154	202.079	298.162	105	101
53	R	I	62.3709	64.1247	123.164	166.841	74.3062	93.3411	197.47	260.182	92	96
53	R	K	79.2796	72.5281	119.365	164.938	31.1972	62.4745	150.562	227.412	69	68
53	R	L	71.9885	59.6523	111.432	139.872	43.3595	94.6068	154.792	234.479	81	85
53	R	M	66.1266	60.8229	88.048	110.26	45.1027	71.0202	133.151	181.28	75	69
53	R	N	77.9516	67.0941	90.285	119.049	25.5368	58.387	115.822	177.436	71	75
53	R	P	80.8869	66.9872	145.001	213.057	34.2628	104.999	179.264	318.056	84	89
53	R	Q	77.9851	71.2062	143.942	195.179	40.6345	78.9247	184.577	274.103	84	84
53	R	S	75.6271	76.0308	81.881	127.813	26.3884	40.2939	108.269	168.107	71	72
53	R	T	79.4556	76.3345	136.542	171.85	35.3047	53.2777	171.846	225.128	78	73
53	R	V	71.4632	65.6209	129.573	175.991	51.7415	92.2024	181.315	268.193	91	94
53	R	W	66.7977	50.2489	125.427	146.174	62.3443	144.725	187.771	290.899	90	85
53	R	Y	68.3034	65.2106	127.474	165.341	59.1551	88.2084	186.629	253.549	93	97
54	Q	A	75.7332	70.6977	92.2967	127.673	29.5742	52.917	121.871	180.59	67	71
54	Q	C	75.4169	73.5261	122.877	197.05	40.0534	70.9501	162.931	268	95	96
54	Q	D	75.8207	64.2258	149.191	195.904	47.5772	109.12	196.768	305.024	106	106
54	Q	E	67.1479	56.7493	131.831	180.798	64.4982	137.793	196.329	318.591	100	104
54	Q	F	72.6253	69.4516	173.382	241.251	65.3531	106.115	238.736	347.366	111	106
54	Q	G	81.8606	77.2697	154.352	229.882	34.2027	67.624	188.555	297.506	89	93
54	Q	H	74.9632	73.2308	206.554	309.804	68.9865	113.248	275.54	423.052	104	106
54	Q	I	76.1064	74.567	148.13	237.783	46.5053	81.102	194.635	318.885	101	98
54	Q	K	76.2904	73.6198	151.832	222.94	47.1865	79.8864	199.018	302.827	97	98
54	Q	L	69.9226	71.0697	149.849	222.975	64.4582	90.7664	214.307	313.742	91	95
54	Q	M	77.5618	75.3455	133.708	197.018	38.6809	64.4682	172.389	261.486	100	94
54	Q	N	74.288	71.5401	151.384	231.686	52.3961	92.169	203.78	323.855	87	92
54	Q	P	75.9873	71.3696	153.314	219.344	48.4488	87.9913	201.763	307.335	82	88
54	Q	R	77.1219	73.8669	142.112	206.378	42.1573	73.0138	184.269	279.392	98	90
54	Q	S	78.9827	70.2711	135.837	205.501	36.1463	86.9394	171.983	292.44	81	84
54	Q	T	76.2311	68.0871	139.34	196.46	43.4463	92.0821	182.786	288.542	90	98
54	Q	V	75.5021	75.4037	168.122	238.792	54.55	77.8928	222.672	316.685	103	107
54	Q	W	71.8779	69.3828	138.708	178.877	54.2695	78.9347	192.978	257.812	105	104
54	Q	Y	76.4897	74.6499	136.831	191.377	42.0571	64.9891	178.888	256.367	83	82
55	R	A	73.6902	68.6684	124.456	180.149	44.4348	82.1973	168.891	262.346	84	90
55	R	C	65.1375	60.4753	139.34	185.017	74.5767	120.922	213.917	305.939	91	99
55	R	D	54.9536	50.9777	112.163	143.872	91.9419	138.354	204.105	282.226	107	104
55	R	E	51.6892	48.5417	99.2503	130.31	92.7634	138.14	192.014	268.45	101	103
55	R	F	57.2658	57.5758	111.643	132.392	83.3127	97.5522	194.955	229.944	82	73
55	R	G	68.4575	62.7368	201.211	269.671	92.71	160.174	293.921	429.844	114	118
55	R	H	76.837	70.7509	178.894	239.064	53.9289	98.8312	232.823	337.895	105	108
55	R	I	73.6283	65.7813	100.601	142.235	36.0327	73.989	136.634	216.224	82	88
55	R	K	80.9784	74.8905	130.31	205.478	30.6094	68.893	160.92	274.37	75	89
55	R	L	73.437	62.4447	118.128	144.691	42.7283	87.0195	160.857	231.711	82	82
55	R	M	68.8512	59.0005	117.854	153.224	53.3177	106.475	171.171	259.699	90	89
55	R	N	77.8385	71.5147	146.358	215.133	41.6697	85.6904	188.027	300.823	96	93
55	R	P	72.0107	71.3496	181.947	243.38	70.7196	97.7292	252.667	341.109	106	104
55	R	Q	81.9636	72.8083	135.033	178.789	29.7145	66.7724	164.747	245.562	97	104
55	R	S	60.8249	63.1118	101.838	149.875	65.5902	87.6006	167.428	237.476	65	70
55	R	T	78.5323	65.7798	139.925	181.845	38.2501	94.6001	178.175	276.445	106	94
55	R	V	66.9386	62.845	110.344	154.101	54.4999	91.107	164.844	245.208	85	88
55	R	W	58.3074	60.2836	133.691	187.175	95.5952	123.316	229.286	310.492	109	111
55	R	Y	64.1719	62.9195	130.632	176.33	72.9337	103.917	203.566	280.247	91	98
56	R	A	68.5484	65.4312	120.456	157.908	55.268	83.4263	175.724	241.334	65	68
56	R	C	64.8619	61.7293	134.629	184.07	72.9337	114.119	207.563	298.189	91	97
56	R	D	61.6403	59.4502	87.6299	113.058	54.5333	77.1147	142.163	190.173	94	91
56	R	E	57.9641	53.7909	132.766	172.312	96.2832	148.025	229.05	320.337	107	114
56	R	F	68.3798	65.165	143.018	200.068	66.1346	106.949	209.153	307.017	96	101
56	R	G	72.0322	69.7312	133.348	190.246	51.7749	82.5814	185.123	272.827	77	76
56	R	H	75.4902	71.1442	189.676	261.232	61.5829	105.954	251.258	367.186	105	105
56	R	I	66.4533	65.1418	144.82	186.184	73.1074	99.6293	217.927	285.814	87	83
56	R	K	80.3797	75.9855	167.92	259.006	40.9885	81.8567	208.909	340.863	98	104
56	R	L	67.2934	62.0595	105.145	137.471	51.1037	84.0441	156.249	221.515	77	76
56	R	M	65.7393	64.0771	150.159	208.378	78.2568	116.821	228.416	325.199	105	107
56	R	N	77.0968	71.6197	171.587	235.274	50.9734	93.2309	222.56	328.505	105	112
56	R	P	74.0056	67.2861	156.7	231.362	55.0409	112.486	211.741	343.848	111	110
56	R	Q	78.1781	71.5133	120.523	177.359	33.6417	70.6495	154.165	248.009	88	90
56	R	S	82.9493	70.1565	120.383	167.403	24.7454	71.2105	145.128	238.613	82	85
56	R	T	73.9805	77.8142	110.578	168.359	38.8913	48.0013	149.47	216.36	86	87
56	R	V	72.4718	68.5083	154.873	212.916	58.8278	97.8728	213.701	310.789	95	90
56	R	W	76.7537	65.5484	150.77	196.483	45.6637	103.269	196.434	299.752	119	118
56	R	Y	73.4082	64.151	133.082	165.353	48.2084	92.4027	181.291	257.756	89	99
57	R	A	77.7431	76.2896	124.392	169.985	35.6119	52.8302	160.004	222.815	86	85
57	R	C	70.4314	70.3589	129.936	171.885	54.55	72.4127	184.486	244.298	93	95
57	R	D	76.5885	63.9135	156.551	230.964	47.8544	130.406	204.406	361.37	115	115
57	R	E	68.9832	68.8594	120.795	169.973	54.3129	76.8676	175.108	246.84	98	100
57	R	F	72.705	68.0496	159.598	216.776	59.9165	101.78	219.515	318.556	101	103
57	R	G	80.4303	74.6175	128.383	189.43	31.2373	64.4381	159.621	253.868	92	95
57	R	H	80.0111	70.9732	175.19	254.544	43.7669	104.104	218.956	358.648	105	113
57	R	I	76.2272	70.0516	155.928	208.396	48.6291	89.0933	204.558	297.489	98	91
57	R	K	82.3844	74.9884	138.875	201.966	29.6944	67.3635	168.569	269.329	89	93
57	R	L	75.4498	68.6737	157.826	234.953	51.3541	107.176	209.18	342.129	108	113
57	R	M	74.8725	69.245	175.14	229.669	58.7777	102.007	233.918	331.676	113	112
57	R	N	81.0946	76.1326	177.052	255.845	41.2757	80.207	218.328	336.052	111	113
57	R	P	77.5169	72.9378	172.084	251.942	49.9115	93.478	221.996	345.42	110	107
57	R	Q	77.014	72.329	217.934	280.235	65.0459	107.21	282.98	387.445	128	124
57	R	S	79.678	80.0287	161.832	246.573	41.2757	61.5328	203.108	308.106	100	99
57	R	T	78.0188	71.6871	203.396	267.714	57.3051	105.734	260.701	373.448	119	116
57	R	V	79.568	72.0963	152.13	210.22	39.0649	81.3625	191.195	291.583	113	111
57	R	W	75.072	63.0875	148.893	205.264	49.4406	120.1	198.334	325.364	101	107
57	R	Y	76.4066	70.8672	196.547	264.352	60.6913	108.673	257.239	373.024	133	132
58	A	C	76.9596	75.7778	120.602	162.873	36.1062	52.0621	156.708	214.935	82	75
58	A	D	77.659	71.7535	139.647	198.606	40.1736	78.1833	179.821	276.789	93	97
58	A	E	80.9045	75.574	133.366	184.772	31.4777	59.7195	164.844	244.491	102	102
58	A	F	76.3029	67.4175	160.066	223.946	49.7111	108.232	209.777	332.178	94	101
58	A	G	81.0054	75.2024	116.041	188.43	27.2099	62.1339	143.25	250.564	82	72
58	A	H	82.4848	72.8999	142.861	198.834	30.3356	73.9155	173.196	272.749	90	98
58	A	I	79.059	76.7873	99.2971	156.446	26.3015	47.2934	125.599	203.739	75	72
58	A	K	83.5429	77.8325	190.173	272.305	37.462	77.5555	227.635	349.861	120	110
58	A	L	81.8335	73.0169	116.824	168.569	25.9342	62.2942	142.758	230.864	90	92
58	A	M	85.1642	74.0202	147.954	213.355	25.7739	74.8839	173.728	288.239	102	101
58	A	N	82.0439	75.7053	150.814	234.222	33.0072	75.1645	183.821	309.386	93	96
58	A	P	81.8541	74.3262	173.491	241.134	38.4605	83.2927	211.951	324.427	111	109
58	A	Q	77.9442	74.152	128.117	190.664	36.2531	66.4618	164.37	257.126	84	81
58	A	R	83.6881	74.1205	126.819	187.003	24.7186	65.293	151.537	252.296	86	87
58	A	S	81.0965	73.8794	135.843	181.237	31.6647	64.0775	167.507	245.314	91	89
58	A	T	79.1036	75.0714	189.623	249.354	50.0918	82.8018	239.715	332.156	110	114
58	A	V	80.8081	73.0295	134.647	185.632	31.9786	68.5557	166.625	254.187	100	99
58	A	W	80.318	79.259	87.162	113.192	21.3592	29.621	108.521	142.813	69	65
58	A	Y	80.0631	76.2514	176.377	250.772	43.9205	78.1032	220.297	328.875	109	110
59	H	A	82.3055	72.5332	123.801	164.715	26.6155	62.3743	150.417	227.09	75	74
59	H	C	82.2054	78.3787	132.766	188.026	28.7394	51.8684	161.506	239.895	83	87
59	H	D	81.7493	73.2713	97.1537	138.085	21.6898	50.3723	118.843	188.458	56	63
59	H	E	84.3427	82.5509	103.347	141.858	19.1852	29.985	122.532	171.843	79	74
59	H	F	81.0815	78.5114	100.215	146.34	23.3829	40.0534	123.598	186.394	74	75
59	H	G	76.0754	73.1367	137.895	200.53	43.3662	73.655	181.262	274.185	76	74
59	H	I	75.3699	69.5781	137.609	194.348	44.9691	84.9758	182.578	279.324	75	85
59	H	K	85.8974	77.2269	127.655	194.737	20.9584	57.4253	148.614	252.163	95	96
59	H	L	83.2011	78.1521	101.768	145.568	20.5477	40.6946	122.316	186.263	76	83
59	H	M	83.1599	80.9803	129.322	178.043	26.188	41.8167	155.51	219.86	92	91
59	H	N	78.3797	76.4114	158.788	230.642	43.8003	71.2005	202.588	301.843	103	100
59	H	P	81.2077	76.5872	142.129	204.299	32.8903	62.4545	175.02	266.754	105	107
59	H	Q	80.202	75.1728	100.812	134.076	24.8856	44.2812	125.697	178.358	74	75
59	H	R	81.677	78.0389	149.068	211.466	33.4413	59.5091	182.51	270.975	94	103
59	H	S	78.5579	68.6119	147.919	193.255	40.374	88.4087	188.293	281.663	99	98
59	H	T	73.0642	62.5005	145.767	201.162	53.7385	120.695	199.506	321.856	94	91
59	H	V	76.7411	72.5444	105.093	151.82	31.8517	57.4587	136.944	209.279	67	74
59	H	W	79.512	72.2581	175.324	235.146	45.1761	90.2788	220.5	325.424	104	103
59	H	Y	77.2931	73.5744	128.462	175.728	37.7392	63.1157	166.201	238.843	78	82
60	Q	A	79.2698	70.7871	125.807	171.324	32.9003	70.7029	158.707	242.027	81	85
60	Q	C	80.7631	76.668	137.93	199.319	32.8536	60.6579	170.784	259.977	102	103
60	Q	D	74.4553	71.5797	168.254	245.915	57.7258	97.639	225.979	343.554	104	111
60	Q	E	82.2426	73.7135	118.69	171.991	25.627	61.3324	144.317	233.323	98	100
60	Q	F	81.564	73.8364	159.651	216.759	36.0862	76.8075	195.737	293.566	93	94
60	Q	G	82.7443	74.6472	129.1	188.272	26.9227	63.9439	156.022	252.216	101	103
60	Q	H	79.1199	73.5493	168.78	240.853	44.5417	86.6188	213.322	327.472	110	101
60	Q	I	79.5247	73.7991	194.138	275.317	49.985	97.7459	244.123	373.063	122	126
60	Q	K	76.7429	73.8282	139.638	197.43	42.3176	69.9883	181.956	267.419	92	97
60	Q	L	82.6687	75.9902	170.026	236.73	35.6453	74.7971	205.671	311.528	113	107
60	Q	M	80.1089	73.1298	123.181	176.71	30.5861	64.929	153.767	241.639	104	98
60	Q	N	78.2753	73.2854	153.086	237.345	42.4879	86.5186	195.574	323.863	86	94
60	Q	P	82.4032	74.3247	132.111	202.369	28.2117	69.9082	160.323	272.277	84	87
60	Q	R	79.6017	72.6295	147.077	200.553	37.6891	75.5785	184.766	276.132	97	101
60	Q	S	77.4159	72.7681	227.321	322.641	66.3149	120.741	293.636	443.382	117	119
60	Q	T	81.9617	70.85	160.113	236.227	35.2379	97.1915	195.351	333.419	103	100
60	Q	V	80.6978	77.9277	140.48	228.528	33.6016	64.7287	174.082	293.257	99	100
60	Q	W	82.7004	77.7189	170.833	254.994	35.7355	73.104	206.568	328.098	108	108
60	Q	Y	75.9088	69.379	158.402	236.046	50.2722	104.181	208.674	340.227	99	101
61	N	A	76.0307	76.7905	110.716	167.025	34.904	50.4825	145.62	217.508	85	85
61	N	C	75.6947	72.127	156.034	217.273	50.1018	83.9639	206.136	301.237	87	86
61	N	D	82.7003	76.3457	113.409	158.376	23.7235	49.07	137.132	207.446	74	78
61	N	E	85.4235	80.4808	156.876	229.669	26.7691	55.7021	183.645	285.371	85	93
61	N	F	81.1787	78.736	130.41	177.096	30.2354	47.8277	160.645	224.924	102	94
61	N	G	82.1499	72.2118	109.365	167.973	23.7636	64.6385	133.128	232.611	90	94
61	N	H	77.7668	78.1484	104.075	146.182	29.7545	40.8749	133.83	187.057	68	71
61	N	I	82.1195	72.7334	143.831	206.308	31.3174	77.3418	175.149	283.65	93	96
61	N	K	82.923	78.9126	108.97	144.638	22.4411	38.6509	131.411	183.289	76	75
61	N	L	77.8366	75.6756	130.556	205.419	37.1748	66.0277	167.731	271.447	93	91
61	N	M	75.7313	76.4888	136.524	199.141	43.7502	61.2122	180.274	260.353	85	84
61	N	P	77.7917	86.7967	100.084	130.138	28.5724	19.7963	128.656	149.934	83	84
61	N	Q	82.213	73.8774	124.98	176.798	27.0396	62.5146	152.019	239.312	76	79
61	N	R	73.788	64.0032	113.654	159.616	40.374	89.7712	154.028	249.387	87	86
61	N	S	76.9326	78.3445	74.1088	113.444	22.2207	31.3575	96.3295	144.801	59	69
61	N	T	84.3513	75.442	126.041	181.026	23.3829	58.928	149.424	239.954	84	83
61	N	V	71.9481	63.966	224.765	284.937	87.634	160.514	312.399	445.452	96	101
61	N	W	75.2224	75.7709	139.726	202.559	46.0244	64.7721	185.75	267.331	92	93
61	N	Y	83.1541	75.0951	117.795	168.078	23.8637	55.7422	141.659	223.82	91	88
62	S	A	83.2278	79.6931	131.31	198.811	26.4618	50.6595	157.772	249.47	94	98
62	S	C	86.0821	76.8179	131.673	180.728	21.289	54.54	152.962	235.268	97	99
62	S	D	84.373	82.9944	150.048	210.472	27.7909	43.1257	177.839	253.598	95	98
62	S	E	79.6605	74.7148	93.4371	135.977	23.8571	46.0177	117.294	181.995	76	76
62	S	F	81.3522	82.6726	134.293	186.547	30.7831	39.0983	165.076	225.645	90	91
62	S	G	88.0558	74.3055	144.761	198.632	19.636	68.6859	164.397	267.318	86	88
62	S	H	82.2157	77.2493	151.972	225.215	32.8736	66.3283	184.846	291.544	102	108
62	S	I	78.6505	81.5316	179.886	255.547	48.8295	57.8861	228.715	313.433	122	121
62	S	K	80.7007	74.7636	135.647	186.211	32.4395	62.8552	168.086	249.066	96	95
62	S	L	82.6119	74.1864	130.386	193.962	27.4436	67.4904	157.83	261.453	93	86
62	S	M	75.1711	71.1896	164.183	246.362	54.2294	99.7028	218.413	346.065	109	118
62	S	N	78.7332	74.0985	129.962	182.509	35.1044	63.797	165.067	246.306	91	99
62	S	P	85.9388	76.6313	113.766	169.891	18.6141	51.8083	132.38	221.699	90	88
62	S	Q	81.2046	76.0059	121.339	183.81	28.0848	58.0264	149.424	241.836	87	92
62	S	R	80.7645	74.4479	149.665	223.765	35.6453	76.8008	185.31	300.566	97	97
62	S	T	84.6581	76.2283	155.288	233.169	28.1416	72.7133	183.43	305.882	111	112
62	S	V	79.5482	78.3521	131.708	194.5	33.8621	53.7385	165.57	248.239	84	90
62	S	W	87.8343	78.8496	115.874	165.157	16.0494	44.3012	131.923	209.458	95	98
62	S	Y	81.482	75.5257	135.626	202.787	30.8232	65.7138	166.449	268.501	87	93
63	Q	A	83.5161	75.0096	140.533	187.88	27.7375	62.5947	168.27	250.475	78	76
63	Q	C	82.8891	68.8438	100.168	149.837	20.6779	67.811	120.846	217.648	62	63
63	Q	D	78.9046	73.2638	88.6972	132.103	23.7135	48.2084	112.411	180.311	71	71
63	Q	E	83.0977	72.171	128.848	176.57	26.208	68.0848	155.056	244.655	79	82
63	Q	F	72.4919	72.2112	109.847	161.06	41.6831	61.9803	151.53	223.041	74	88
63	Q	G	83.9305	75.1901	135.872	199.641	26.0144	65.8741	161.886	265.515	82	88
63	Q	H	77.9741	71.2844	156.902	210.747	44.3212	84.8956	201.223	295.642	99	98
63	Q	I	76.8782	74.8385	148.364	215.577	44.6218	72.4795	192.986	288.057	83	78
63	Q	K	81.1855	75.597	123.637	171.254	28.6525	55.2813	152.29	226.535	101	94
63	Q	L	80.405	74.6679	167.148	230.923	40.7347	78.3436	207.883	309.267	100	107
63	Q	M	78.0995	74.9489	115.576	170.578	32.4094	57.0145	147.985	227.593	81	82
63	Q	N	76.0974	77.1105	155.2	217.958	48.7494	64.6986	203.95	282.656	86	86
63	Q	P	79.5802	75.9514	139.191	199.018	35.7155	63.0155	174.906	262.034	87	93
63	Q	R	84.9938	75.9768	150.937	206.203	26.6489	65.1995	177.586	271.402	96	98
63	Q	S	78.5502	70.9573	159.616	226.607	43.5866	92.75	203.202	319.357	90	88
63	Q	T	71.0733	78.598	114.28	166.692	46.5119	45.3899	160.792	212.082	81	92
63	Q	V	85.485	79.6084	151.99	211.045	25.8073	54.0591	177.797	265.104	96	97
63	Q	W	82.3644	75.5203	121.699	167.701	26.0578	54.3597	147.756	222.061	79	80
63	Q	Y	77.35	75.1792	131.48	191.079	38.5006	63.0856	169.98	254.165	90	92
64	T	A	79.5991	75.6532	117.541	172.648	30.1252	55.5619	147.666	228.21	84	84
64	T	C	76.4128	72.983	138.931	192.565	42.8853	71.284	181.816	263.849	97	97
64	T	D	87.877	76.1469	110.432	160.464	15.2346	50.2655	125.667	210.729	75	75
64	T	E	86.2137	83.6947	102.163	133.223	16.3366	25.9542	118.499	159.177	90	81
64	T	F	72.4574	63.4396	103.473	152.978	39.3321	88.1616	142.805	241.14	77	76
64	T	G	78.4892	74.1001	117.976	171.938	32.3326	60.0968	150.309	232.035	83	84
64	T	H	81.017	73.8376	109.8	167.838	25.7272	59.469	135.528	227.307	72	72
64	T	I	78.6569	77.719	108.917	163.929	29.5542	46.9962	138.472	210.925	79	78
64	T	K	74.3969	71.5559	170.912	261.354	58.8178	103.89	229.729	365.245	96	94
64	T	L	78.0159	75.1317	127.918	191.693	36.0461	63.4496	163.964	255.143	92	95
64	T	M	85.0463	76.3405	134.068	193.307	23.5732	59.9098	157.641	253.217	103	103
64	T	N	83.2517	67.8326	101.54	148.305	20.4274	70.3289	121.967	218.634	87	81
64	T	P	78.1508	77.0105	124.129	187.061	34.7036	55.8424	158.832	242.904	81	81
64	T	Q	84.5666	77.3893	142.545	216.39	26.0144	63.2226	168.559	279.613	97	111
64	T	R	75.5755	77.4896	156.072	227.385	50.4391	66.0544	206.511	293.439	105	103
64	T	S	79.6666	78.0503	96.3642	134.445	24.5951	37.8093	120.959	172.254	51	51
64	T	V	79.8313	79.6642	142.597	194.793	36.026	49.7245	178.623	244.517	94	88
64	T	W	77.4508	70.9824	126.883	171.646	36.9411	70.1686	163.824	241.814	85	90
64	T	Y	77.9888	72.8776	132.047	187.161	37.2683	69.6544	169.315	256.815	91	87
65	H	A	86.6789	73.8073	145.153	212.01	22.3076	75.2379	167.461	287.248	92	91
65	H	C	75.2787	73.2678	170.412	227.21	55.9626	82.8986	226.374	310.108	96	92
65	H	D	82.3647	76.8304	160.63	220.221	34.393	66.4117	195.023	286.633	101	100
65	H	E	81.7087	74.1466	173.149	249.512	38.7611	86.9995	211.91	336.511	92	94
65	H	F	82.7043	74.8266	186.225	264.796	38.9447	89.0833	225.17	353.879	105	107
65	H	G	82.8059	76.8318	157.803	224.835	32.7667	67.7976	190.569	292.633	96	104
65	H	I	82.3114	77.6307	164.131	248.544	35.2713	71.618	199.402	320.162	109	115
65	H	K	76.2364	75.4815	205.729	304.935	64.1276	99.0516	269.857	403.987	109	110
65	H	L	78.3582	73.6907	129.532	188.316	35.7756	67.2333	165.308	255.549	113	112
65	H	M	84.98	78.3902	180.324	245.017	31.8718	67.5438	212.196	312.561	125	120
65	H	N	83.5518	75.8282	209.922	301.365	41.3258	96.0661	251.248	397.431	95	98
65	H	P	79.7505	71.2851	171.517	245.722	43.5498	98.9815	215.067	344.704	106	106
65	H	Q	80.2255	82.6564	162.253	225.168	39.9933	47.2466	202.247	272.415	121	117
65	H	R	83.8387	76.2962	119.067	176.517	22.9521	54.8405	142.019	231.358	91	96
65	H	S	80.2329	74.2977	234.9	361.461	57.8728	125.043	292.773	486.504	120	130
65	H	T	80.2237	73.6053	206.858	306.085	50.9935	109.761	257.851	415.846	120	117
65	H	V	82.3901	80.2378	125.743	180.576	26.8759	44.4749	152.619	225.051	104	104
65	H	W	78.1474	73.5974	200.606	267.013	56.0962	95.7889	256.702	362.802	109	105
65	H	Y	80.2356	76.0368	148.244	208.185	36.5169	65.6103	184.761	273.796	96	98
66	Q	A	81.1564	73.5096	167.499	247.257	38.8913	89.1033	206.39	336.361	95	99
66	Q	C	76.7788	77.1907	186.757	283.662	56.4835	83.8203	243.241	367.483	114	109
66	Q	D	80.2878	73.4894	202.922	272.995	49.8213	98.4805	252.743	371.476	101	96
66	Q	E	81.3983	75.5821	168.21	233.757	38.4405	75.5184	206.65	309.275	91	99
66	Q	F	74.1239	72.0986	189.524	273.808	66.1613	105.961	255.685	379.769	124	128
66	Q	G	76.1722	72.9001	105.794	156.382	33.094	58.1332	138.888	214.515	92	96
66	Q	H	83.5242	78.2029	130.831	197.834	25.8073	55.1411	156.638	252.975	94	89
66	Q	I	76.8812	73.2559	141.504	199.191	42.5513	72.72	184.055	271.911	84	82
66	Q	K	75.8787	71.946	154.455	222.703	49.1	86.8392	203.555	309.543	94	95
66	Q	L	76.2335	71.8061	155.148	220.019	48.3687	86.3884	203.516	306.407	102	105
66	Q	M	80.5449	71.3726	111.35	158.423	26.896	63.5432	138.246	221.966	70	74
66	Q	N	73.283	68.7694	152.595	218.993	55.632	99.4523	208.227	318.445	81	83
66	Q	P	77.3431	75.7774	196.167	274.706	57.4653	87.811	253.632	362.517	116	121
66	Q	R	77.8467	74.8495	142.086	205.904	40.4341	69.1868	182.52	275.091	91	90
66	Q	S	76.5366	74.468	160.674	238.865	49.257	81.8968	209.931	320.762	91	96
66	Q	T	79.306	69.8676	184.289	266.767	48.0882	115.051	232.378	381.818	93	88
66	Q	V	80.0948	74.0402	189.95	238.169	47.2065	83.5064	237.157	321.676	99	101
66	Q	W	73.249	71.5821	145.317	193.068	53.0706	76.6472	198.387	269.715	97	101
66	Q	Y	77.9488	71.9479	163.683	228.686	46.3049	89.1635	209.988	317.85	96	95
67	A	C	80.7041	72.58	149.756	231.099	35.8056	87.3067	185.561	318.405	82	89
67	A	D	80.0752	77.7194	187.14	252.626	46.5654	72.4228	233.706	325.049	100	98
67	A	E	77.1439	79.786	174.21	249.24	51.6146	63.1458	225.825	312.386	94	94
67	A	F	73.4442	65.537	163.75	216.87	59.2085	114.042	222.959	330.912	92	89
67	A	G	82.0173	74.6864	158.92	229.493	34.8439	77.7826	193.764	307.276	80	81
67	A	H	80.3851	73.7404	153.58	211.653	37.4754	75.3715	191.056	287.025	98	100
67	A	I	74.3376	75.5926	152.978	218.086	52.8101	70.4158	205.788	288.502	81	81
67	A	K	83.4692	77.6509	94.4606	131.065	18.7076	37.7225	113.168	168.787	74	78
67	A	L	77.9217	76.1016	136.977	191.073	38.8111	60.0033	175.788	251.077	89	85
67	A	M	78.274	68.9182	174.815	230.683	48.5223	104.037	223.338	334.721	105	106
67	A	N	76.6819	76.0324	180.014	252.386	54.7403	79.5592	234.755	331.945	90	99
67	A	P	77.8175	72.7742	149.682	211.58	42.6682	79.1551	192.351	290.735	84	87
67	A	Q	80.4147	73.9163	152.224	213.267	37.0746	75.258	189.298	288.525	98	101
67	A	R	78.0165	74.0199	138.802	198.471	39.1117	69.661	177.914	268.132	96	90
67	A	S	76.0746	76.4016	122.45	186.956	38.5106	57.7459	160.961	244.702	85	86
67	A	T	80.2431	75.2986	157.999	256.073	38.9013	84.004	196.9	340.077	85	88
67	A	V	79.941	72.0463	120.857	168.429	30.3256	65.3498	151.182	233.779	87	92
67	A	W	80.138	71.5554	128.567	174.786	31.8651	69.4807	160.433	244.267	84	88
67	A	Y	73.1781	73.1019	178.576	242.795	65.4533	89.3371	244.029	332.132	90	93
68	S	A	80.1132	70.0184	99.4433	128.05	24.6853	54.8305	124.129	182.88	83	85
68	S	C	76.8118	76.4835	131.252	177.675	39.6226	54.6301	170.874	232.305	81	81
68	S	D	83.8316	75.6469	125.047	165.639	24.1175	53.3244	149.164	218.964	80	77
68	S	E	78.1287	76.3404	187.36	275.305	52.4495	85.3231	239.809	360.628	99	99
68	S	F	75.0328	70.349	125.76	193.72	41.8467	81.6497	167.607	275.369	80	80
68	S	G	78.3939	74.8208	143.194	204.717	39.4657	68.893	182.66	273.61	93	91
68	S	H	79.8301	76.2942	108.672	168.523	27.457	52.3627	136.129	220.885	68	72
68	S	I	79.3902	72.0856	129.024	178.839	33.4947	69.2536	162.518	248.092	92	96
68	S	K	79.6771	69.9275	170.517	242.415	43.4931	104.251	214.01	346.666	105	107
68	S	L	77.4435	74.3272	82.4132	118.204	24.004	40.8282	106.417	159.033	64	65
68	S	M	78.0715	73.2871	125.409	172.096	35.2246	62.7283	160.634	234.824	87	82
68	S	N	80.2959	75.3766	142.1	205.904	34.8706	67.2633	176.971	273.168	83	88
68	S	P	84.2238	74.1507	155.534	224.16	29.1334	78.1433	184.667	302.303	108	109
68	S	Q	77.6166	70.0139	103.987	142.018	29.9883	60.8248	133.976	202.843	63	59
68	S	R	77.5946	75.0699	111.35	149.329	32.1523	49.5909	143.503	198.92	82	81
68	S	T	77.0029	74.5606	127.874	167.78	38.19	57.2449	166.064	225.025	87	96
68	S	V	73.6692	70.9984	91.7879	129.398	32.8068	52.8569	124.595	182.255	74	72
68	S	W	74.6691	66.207	114.435	180.184	38.8212	91.9686	153.256	272.153	84	81
68	S	Y	80.0559	72.9736	120.4	162.087	29.995	60.03	150.395	222.117	77	84
69	L	A	81.8345	75.4822	103.052	146.258	22.8753	47.5071	125.927	193.765	73	74
69	L	C	79.9029	69.5118	133.86	188.214	33.6684	82.5513	167.528	270.765	69	71
69	L	D	86.2311	79.2212	158.446	221.893	25.2997	58.2	183.746	280.094	76	75
69	L	E	82.5704	79.8239	133.112	179.605	28.0982	45.3966	161.21	225.002	85	84
69	L	F	82.2712	78.6064	112.321	158.727	24.2044	43.1992	136.525	201.926	71	79
69	L	G	82.2123	78.3336	135.082	190.231	29.2269	52.6165	164.309	242.848	87	93
69	L	H	83.9697	74.0847	109.207	154.569	20.8482	54.0691	130.055	208.638	73	83
69	L	I	79.6037	75.1825	138.024	204.922	35.3648	67.644	173.389	272.566	88	94
69	L	K	79.266	78.9709	133.31	184.775	34.8706	49.2035	168.181	233.978	84	90
69	L	M	82.7081	76.1351	160.095	236.257	33.4714	74.0558	193.567	310.312	93	99
69	L	N	81.1245	75.1943	141.258	208.027	32.8669	68.6258	174.125	276.653	85	82
69	L	P	80.436	73.2509	136.05	189.491	33.0907	69.1968	169.141	258.688	74	75
69	L	Q	81.2963	79.046	131.55	191.799	30.2655	50.8432	161.816	242.642	84	94
69	L	R	82.8506	70.8612	127.146	185.403	26.3182	76.2398	153.465	261.643	91	91
69	L	S	80.3769	78.0223	122.368	161.92	29.8748	45.6103	152.243	207.53	70	69
69	L	T	78.4564	80.6405	143.773	206.261	39.479	49.5174	183.252	255.779	87	90
69	L	V	80.5736	77.4729	121.541	179.403	29.3037	52.1656	150.845	231.569	69	66
69	L	W	74.9658	73.4752	135.802	196.185	45.3498	70.8232	181.152	267.008	83	89
69	L	Y	82.8732	77.1459	131.889	170.622	27.2566	50.546	159.146	221.168	80	75
70	S	A	80.2924	77.3226	222.94	326.735	54.7203	95.8257	277.661	422.56	121	113
70	S	C	75.5118	71.4216	180.228	249.722	58.4471	99.9232	238.675	349.645	109	105
70	S	D	81.4403	75.2208	145.188	201.957	33.0873	66.5286	178.275	268.486	84	85
70	S	E	80.2024	68.5575	146.352	202.612	36.1262	92.9237	182.478	295.536	85	86
70	S	F	74.1342	75.2204	112.874	161.911	39.3822	53.3378	152.256	215.249	91	90
70	S	G	79.735	76.8448	153.048	233.666	38.898	70.4091	191.946	304.075	91	93
70	S	H	80.2416	73.8995	155.99	226.11	38.4104	79.8597	194.4	305.97	107	106
70	S	I	80.1836	73.759	144.557	218.314	35.7255	77.669	180.282	295.983	91	99
70	S	K	81.8068	72.7861	166.318	221.578	36.9878	82.8452	203.306	304.423	101	101
70	S	L	79.9751	78.1411	131.503	178.424	32.927	49.9115	164.43	228.335	74	73
70	S	M	80.372	73.6377	153.042	205.741	37.3752	73.655	190.417	279.396	90	90
70	S	N	83.1813	75.3901	132.69	195.15	26.8292	63.7034	159.52	258.853	85	89
70	S	P	81.854	82.0392	137.156	203.132	30.4057	44.4715	167.561	247.604	83	82
70	S	Q	77.3663	75.1569	176.178	249.719	51.5412	82.5447	227.719	332.264	92	93
70	S	R	77.4862	73.1564	118.544	187.88	34.4431	68.9397	152.987	256.82	77	88
70	S	T	84.0121	76.8557	140.349	195.816	26.709	58.9681	167.058	254.784	97	100
70	S	V	78.5961	76.0265	158.212	226.993	43.0857	71.5779	201.298	298.571	96	99
70	S	W	73.337	73.1819	138.164	190.904	50.2321	69.9582	188.396	260.862	92	96
70	S	Y	88.1155	77.2423	114.093	168.929	15.3882	49.7712	129.481	218.7	79	84
71	K	A	83.3388	74.7049	169.511	245.912	33.8888	83.266	203.4	329.178	99	101
71	K	C	79.6975	70.3249	200.647	274.218	51.1137	115.712	251.761	389.93	87	94
71	K	D	80.2453	81.0504	71.2577	98.4695	17.5422	23.0222	88.7999	121.492	51	51
71	K	E	78.2336	68.0635	104.496	153.516	29.0733	72.032	133.569	225.548	65	69
71	K	F	78.9671	75.2105	116.251	163.709	30.9634	53.9589	147.215	217.668	75	73
71	K	G	80.2143	74.9271	150.902	219.01	37.2216	73.2877	188.123	292.298	93	92
71	K	H	82.39	71.8316	125.945	169.227	26.9193	66.3617	152.864	235.589	78	77
71	K	I	81.9518	74.8686	74.9684	109.742	16.5103	36.8375	91.4787	146.58	59	60
71	K	L	84.2164	79.3444	108.567	157.244	20.3473	40.935	128.914	198.179	88	87
71	K	M	85.1425	79.6934	96.566	137.217	16.8509	34.9641	113.417	172.181	82	77
71	K	N	83.8711	76.0801	164.832	231.783	31.6981	72.8736	196.53	304.656	90	97
71	K	P	83.803	78.0804	133.492	194.992	25.8006	54.7403	159.292	249.732	83	80
71	K	Q	79.9808	73.9293	155.779	218.695	38.9915	77.1214	194.771	295.816	85	85
71	K	R	78.5652	74.6791	156.025	215.37	42.568	73.0239	198.593	288.394	91	93
71	K	S	85.6585	76.7103	89.3375	115.988	14.9574	35.2146	104.295	151.202	68	71
71	K	T	83.3794	79.0799	120.269	174.885	23.9739	46.2648	144.243	221.15	81	81
71	K	V	84.1233	75.8251	149.481	217.949	28.2117	69.4874	177.692	287.436	87	86
71	K	W	73.9414	70.8863	171.473	219.291	60.4308	90.0651	231.904	309.356	96	97
71	K	Y	78.6405	74.3322	126.848	187.333	34.4532	64.6886	161.301	252.022	89	94
72	Q	A	78.9679	77.0917	104.42	147.533	27.811	43.8404	132.231	191.374	73	71
72	Q	C	77.3573	75.025	126.755	183.681	37.1013	61.1454	163.856	244.827	81	88
72	Q	D	83.3295	74.9307	83.5302	120.795	16.7106	40.4141	100.241	161.209	59	64
72	Q	E	87.3647	77.9508	105.014	150.349	15.1878	42.528	120.202	192.877	67	65
72	Q	F	68.6848	75.6609	90.0042	122.497	41.0352	39.4056	131.039	161.903	74	78
72	Q	G	82.1334	75.3152	142.586	192.53	31.0169	63.1023	173.603	255.632	98	93
72	Q	H	79.3911	71.4832	140.48	205.676	36.4669	82.0504	176.947	287.727	85	82
72	Q	I	79.3419	73.9248	140.726	197.512	36.6405	69.6677	177.366	267.18	81	83
72	Q	K	84.8826	74.7423	108.567	145.533	19.3354	49.1802	127.902	194.713	66	68
72	Q	L	87.5172	73.2445	102.759	135.84	14.6569	49.621	117.416	185.461	74	76
72	Q	M	77.4144	78.8625	100.361	136.504	29.2803	36.5871	129.642	173.091	73	72
72	Q	N	85.1653	77.0369	113.19	170.368	19.7161	50.7831	132.906	221.151	80	86
72	Q	P	79.7155	75.7639	131.971	192.544	33.5816	61.5929	165.553	254.137	89	89
72	Q	R	77.3677	81.0398	90.9955	146.103	26.6188	34.1827	117.614	180.286	67	63
72	Q	S	92.1133	77.8113	85.7292	104.906	7.34012	29.9148	93.0693	134.82	54	55
72	Q	T	84.7232	80.7749	126.567	178.921	22.8218	42.5847	149.389	221.505	92	93
72	Q	V	77.0357	78.7775	114.064	175.131	34.0023	47.1798	148.066	222.311	85	84
72	Q	W	75.9686	72.2205	131.959	178.377	41.7432	68.6124	173.703	246.989	93	90
72	Q	Y	73.8424	69.9016	101.277	144.814	35.8758	62.3543	137.152	207.168	70	71
73	P	A	81.6277	75.0274	123.83	187.939	27.8711	62.5547	151.701	250.493	95	95
73	P	C	80.0928	77.4251	121.646	196.299	30.2354	57.2349	151.882	253.534	78	78
73	P	D	79.8117	79.4722	111.611	152.621	28.2318	39.4223	139.842	192.043	79	79
73	P	E	81.8651	77.1046	132.872	207.021	29.434	61.4727	162.306	268.494	91	95
73	P	F	75.2047	74.5911	129.778	182.166	42.7884	62.0538	172.566	244.22	80	74
73	P	G	82.1072	82.7449	111.76	163.631	24.3546	34.1226	136.114	197.753	81	82
73	P	H	74.4106	79.3628	120.374	172.061	41.3959	44.742	161.77	216.803	81	83
73	P	I	77.8	73.8032	154.306	224.581	44.0307	79.7161	198.336	304.297	93	92
73	P	K	81.8043	78.924	110.379	166.622	24.5517	44.4949	134.931	211.117	88	91
73	P	L	81.7838	76.9332	149.419	207.799	33.281	62.3042	182.7	270.103	97	97
73	P	M	79.2591	69.1843	108.625	157.686	28.4254	70.2354	137.05	227.921	76	66
73	P	N	79.135	72.6306	180.219	246.319	47.5171	92.8202	227.736	339.139	99	104
73	P	Q	84.2929	75.5122	138.55	215.265	25.8173	69.808	164.368	285.072	111	109
73	P	R	80.3454	81.9883	133.427	202.615	32.6398	44.5116	166.067	247.126	92	97
73	P	S	79.4338	77.5623	142.744	206.264	36.9577	59.6694	179.701	265.933	83	92
73	P	T	82.0076	78.3221	158.358	222.607	34.7437	61.6129	193.102	284.22	97	102
73	P	V	82.2081	80.5871	138.901	205.086	30.0618	49.4039	168.963	254.49	85	83
73	P	W	80.3697	73.4528	152.118	206.437	37.1548	74.6101	189.273	281.047	108	109
73	P	Y	76.0178	72.6742	100.698	149.288	31.7682	56.1329	132.466	205.421	79	81
74	T	A	79.9631	73.9191	165.762	235.502	41.5361	83.0923	207.298	318.595	95	88
74	T	C	81.9628	76.8259	181.824	248.828	40.0134	75.0576	221.838	323.885	101	106
74	T	D	84.3285	80.2308	139.085	200.974	25.8474	49.5208	164.933	250.495	93	86
74	T	E	83.4709	77.3446	127.222	167.318	25.1928	49.0098	152.415	216.328	81	78
74	T	F	80.0101	71.4145	166.21	217.8	41.5261	87.1798	207.736	304.98	100	100
74	T	G	82.3799	78.9412	125.997	170.762	26.9494	45.5535	152.947	216.316	74	74
74	T	H	76.1148	69.176	200.141	304.269	62.8051	135.579	262.946	439.847	107	113
74	T	I	78.5608	71.8319	146.182	205.15	39.8931	80.4475	186.075	285.597	94	91
74	T	K	82.1081	69.902	150.156	202.264	32.72	87.0897	182.876	289.354	96	92
74	T	L	77.0675	75.2198	154.042	242.778	45.8374	79.98	199.88	322.757	89	88
74	T	M	83.8731	73.4505	187.886	264.635	36.1262	95.6554	224.012	360.291	97	103
74	T	N	81.1474	73.1689	134.024	210.694	31.1371	77.2616	165.161	287.956	87	90
74	T	P	79.0824	72.7876	241.801	342.788	63.9572	128.155	305.758	470.943	118	114
74	T	Q	75.2006	71.6871	145.03	216.203	47.8277	85.3899	192.858	301.593	99	97
74	T	R	76.7277	72.7274	127.848	176.307	38.7778	66.1145	166.626	242.421	73	77
74	T	S	85.8256	73.5838	156.99	225.765	25.9275	81.0486	182.917	306.814	93	93
74	T	V	76.5461	75.2385	123.158	164.686	37.7358	54.1994	160.894	218.885	86	83
74	T	W	76.0491	78.0172	102.917	144.141	32.4128	40.6145	135.33	184.756	67	73
74	T	Y	76.2875	70.0707	183.877	264.855	57.1548	113.127	241.032	377.982	97	98
75	S	A	77.8769	71.475	115.462	159.253	32.8001	63.5565	148.262	222.81	77	80
75	S	C	83.2283	79.4222	157.797	233.239	31.7983	60.4308	189.595	293.67	83	83
75	S	D	80.8074	76.0123	129.875	173.684	30.8465	54.8105	160.721	228.494	72	79
75	S	E	81.5746	74.6544	139.568	196.547	31.5245	66.729	171.092	263.276	93	97
75	S	F	82.3133	77.5909	127.287	195.711	27.3501	56.5236	154.637	252.235	93	91
75	S	G	84.6807	79.3814	119.12	175.921	21.5495	45.6938	140.669	221.614	72	75
75	S	H	80.7321	72.5992	202.79	298.567	48.3987	112.687	251.189	411.253	135	133
75	S	I	79.3779	79.9086	167.631	231.862	43.5498	58.2969	211.181	290.159	93	90
75	S	K	80.1035	78.061	146.44	207.366	36.3733	58.2802	182.813	265.647	78	80
75	S	L	83.2019	71.6457	154.124	219.73	31.117	86.9594	185.241	306.689	97	100
75	S	M	80.5452	76.903	158.083	226.204	38.1833	67.9379	196.267	294.142	99	96
75	S	N	82.7309	73.7552	133.041	194.913	27.7709	69.3571	160.812	264.27	95	105
75	S	P	75.8987	71.2354	153.393	218.133	48.7093	88.0815	202.102	306.215	102	98
75	S	Q	82.6452	74.1495	156.452	228.438	32.8536	79.6393	189.305	308.077	87	91
75	S	R	81.4021	72.6555	107.607	158.668	24.5851	59.7161	132.192	218.384	71	74
75	S	T	82.096	76.3615	161.516	211.396	35.2246	65.44	196.741	276.836	93	95
75	S	V	80.6427	75.5135	165.973	234.415	39.8397	76.0127	205.812	310.427	103	97
75	S	W	72.5999	70.5165	133.866	180.14	50.5226	75.3181	184.389	255.458	76	79
75	S	Y	78.8825	78.1722	161.516	235.222	43.2393	65.6804	204.756	300.902	103	109
76	Q	A	84.1961	81.0368	116.959	162.201	21.9536	37.9562	138.912	200.157	70	73
76	Q	C	80.8994	74.5163	106.052	134.872	25.0392	46.1246	131.091	180.996	66	68
76	Q	D	81.6042	68.0328	94.1272	124.857	21.2189	58.6675	115.346	183.524	70	71
76	Q	E	82.5859	79.9433	78.4423	106.338	16.5403	26.6789	94.9826	133.017	49	50
76	Q	F	81.9792	73.0866	145.931	210.267	32.0788	77.4286	178.01	287.696	86	88
76	Q	G	89.8766	73.5687	45.1834	59.804	5.08933	21.4861	50.2727	81.29	31	32
76	Q	H	83.0923	73.4179	147.902	209.185	30.0952	75.7388	177.997	284.924	88	84
76	Q	I	80.4268	77.9791	118.146	170.452	28.7527	48.1349	146.899	218.587	76	75
76	Q	K	81.1351	75.4225	88.3726	112.339	20.5477	36.6071	108.92	148.946	74	66
76	Q	L	80.0932	73.1702	126.567	175.517	31.4577	64.358	158.025	239.875	72	71
76	Q	M	82.5035	77.7523	93.2851	127.983	19.7829	36.6205	113.068	164.603	57	57
76	Q	N	87.1014	82.4486	147.954	215.449	21.9102	45.8641	169.865	261.313	78	92
76	Q	P	86.0387	76.9299	112.181	148.63	18.2034	44.5717	130.384	193.202	64	64
76	Q	R	85.6465	78.1668	70.8981	71.1612	11.8818	19.8764	82.7799	91.0377	39	38
76	Q	S	86.6238	76.0435	107.958	156.586	16.6706	49.3304	124.629	205.917	70	70
76	Q	T	83.536	74.9657	171.54	266.761	33.8086	89.0833	205.349	355.844	102	108
76	Q	V	80.0813	76.8819	43.4465	66.4125	10.8065	19.9699	54.253	86.3824	39	39
76	Q	W	73.555	79.3485	76.7229	101.981	27.5839	26.542	104.307	128.523	50	53
76	Q	Y	79.0575	71.9301	149.121	200.194	39.5024	78.1232	188.623	278.317	93	89
77	S	A	88.1009	73.9424	135.445	197.237	18.2935	69.5074	153.739	266.745	88	86
77	S	C	78.0357	72.3762	121.374	161.85	34.1626	61.7732	155.537	223.623	79	79
77	S	D	90.6799	75.4515	122.427	180.658	12.5831	58.7777	135.01	239.435	81	83
77	S	E	81.6763	83.0216	144.001	220.806	32.3059	45.1561	176.307	265.962	92	84
77	S	F	81.4172	75.1287	169.254	249.363	38.6308	82.5513	207.884	331.914	102	99
77	S	G	81.4773	79.6102	104.663	146.919	23.7936	37.629	128.456	184.548	81	86
77	S	H	83.6821	77.397	164.508	237.046	32.0788	69.2269	196.587	306.273	102	102
77	S	I	85.6361	78.4415	122.085	170.341	20.4775	46.8158	142.562	217.157	72	78
77	S	K	76.8292	75.7995	157.744	215.343	47.5739	68.7527	205.318	284.096	92	82
77	S	L	82.7984	79.8083	161.353	228.982	33.5215	57.9329	194.874	286.914	100	95
77	S	M	80.9782	72.8244	181.488	245.041	42.6315	91.441	224.12	336.482	107	97
77	S	N	81.5369	71.1858	143.48	192.509	32.4896	77.9228	175.97	270.432	92	86
77	S	P	85.057	74.5694	196.851	272.908	34.5834	93.0706	231.435	365.978	98	102
77	S	Q	86.4387	77.2867	157.002	216.946	24.6318	63.7569	181.633	280.703	88	84
77	S	R	78.0543	74.2487	117.824	178.669	33.1274	61.9669	150.952	240.636	81	83
77	S	T	81.6712	74.0235	142.761	191.676	32.0387	67.2633	174.8	258.939	83	87
77	S	V	84.2352	75.7333	128.831	180.155	24.1109	57.7258	152.941	237.881	88	92
77	S	W	81.699	72.8017	113.33	147.516	25.3865	55.111	138.716	202.627	72	70
77	S	Y	80.4999	77.8551	91.5657	126.094	22.1807	35.8657	113.746	161.959	61	61
78	R	A	82.7043	79.0159	256.965	379.03	53.7385	100.658	310.704	479.687	126	130
78	R	C	84.0286	80.4351	124.076	186.991	23.5832	45.4834	147.659	232.475	65	69
78	R	D	83.937	80.0968	159.949	246.31	30.6094	61.2055	190.558	307.515	86	95
78	R	E	75.9346	71.5284	233.186	348.32	73.9021	138.647	307.089	486.968	104	102
78	R	F	73.5322	70.5788	80.4365	120.438	28.9531	50.2054	109.39	170.644	37	38
78	R	G	80.8699	74.9357	151.279	201.878	35.7856	67.5238	187.065	269.402	85	82
78	R	H	85.4638	80.3695	234.371	349.376	39.8631	85.3364	274.234	434.713	121	125
78	R	I	88.2075	77.585	163.212	221.098	21.82	63.8771	185.032	284.975	84	83
78	R	K	81.3482	73.7142	218.034	308.763	49.9916	110.102	268.025	418.865	103	99
78	R	L	81.3474	79.714	194.035	277.46	44.4916	70.6094	238.527	348.07	93	94
78	R	M	78.9578	74.5311	186.459	257.386	49.6911	87.9546	236.15	345.341	88	88
78	R	N	83.8518	80.1324	204.273	291.903	39.3388	72.3727	243.612	364.275	114	112
78	R	P	76.8154	75.6516	181.631	264.179	54.8205	85.0259	236.452	349.205	91	90
78	R	Q	84.8199	79.044	227.888	316.892	40.7848	84.014	268.673	400.906	118	112
78	R	S	82.2692	80.1984	215.501	317.462	46.4451	78.3837	261.947	395.846	100	102
78	R	T	85.276	74.046	174.184	255.486	30.0751	89.5508	204.259	345.037	96	101
78	R	V	86.8656	79.1799	192.588	295.125	29.12	77.6023	221.708	372.727	91	97
78	R	W	79.496	73.0643	195.843	264.442	50.5126	97.4887	246.355	361.931	112	107
78	R	Y	77.5942	72.9799	223.227	323.103	64.4582	119.626	287.685	442.729	96	99
79	G	A	81.6909	74.5978	236.818	338.455	53.0773	115.251	289.895	453.706	113	111
79	G	C	80.7752	74.8505	221.116	339.972	52.6265	114.229	273.742	454.202	104	106
79	G	D	84.6924	79.142	157.472	223.44	28.4622	58.888	185.935	282.328	91	87
79	G	E	85.2566	80.4997	130.234	166.008	22.5213	40.2137	152.755	206.222	85	77
79	G	F	80.7049	73.7899	178.704	272.159	42.725	96.6705	221.429	368.83	91	95
79	G	H	78.1626	74.876	254.62	354.765	71.1371	119.038	325.757	473.803	121	129
79	G	I	76.9176	76.2889	204.045	294.85	61.2322	91.6413	265.277	386.491	104	110
79	G	K	81.4091	76.4685	184.474	255.109	42.1272	78.5039	226.601	333.612	93	98
79	G	L	81.8514	73.973	246.205	358.201	54.5901	126.031	300.795	484.232	115	114
79	G	M	80.6909	76.8768	188.605	263.363	45.1327	79.2152	233.738	342.578	104	104
79	G	N	81.4688	76.5366	248.819	367.514	56.5971	112.667	305.416	480.181	122	122
79	G	P	77.7121	77.1772	155.212	209.84	44.5149	62.0538	199.727	271.894	67	60
79	G	Q	82.8235	78.1497	291.294	382.79	60.4107	107.026	351.705	489.816	124	118
79	G	R	83.0692	71.3934	160.832	239.327	32.7801	95.8958	193.612	335.223	91	91
79	G	S	80.3394	73.9823	178.245	260.547	43.62	91.628	221.865	352.175	115	116
79	G	T	79.6744	75.5497	250.497	341.156	63.9038	110.409	314.401	451.565	99	103
79	G	V	75.7126	76.0444	176.517	261.223	56.6238	82.2909	233.141	343.514	120	118
79	G	W	80.4546	72.0956	137.077	185.64	33.301	71.8517	170.378	257.492	82	85
79	G	Y	78.3451	72.3883	194.179	263.819	53.6717	100.631	247.85	364.451	94	98
80	D	A	75.8753	82.067	111.479	178.254	35.445	38.9514	146.924	217.205	69	70
80	D	C	73.5352	73.6386	148.928	203.483	53.5983	72.8435	202.526	276.327	95	95
80	D	E	82.6027	77.0261	150.218	203.887	31.638	60.8115	181.856	264.698	83	88
80	D	F	74.9319	66.9772	181.684	256.512	60.7814	126.472	242.465	382.984	110	119
80	D	G	75.5096	73.4999	183.728	258.749	59.5892	93.291	243.317	352.04	83	82
80	D	H	77.9858	69.6201	167.727	227.519	47.3468	99.282	215.074	326.801	113	107
80	D	I	78.4523	73.544	168.043	247.389	46.1546	88.9931	214.198	336.382	83	80
80	D	K	79.3155	70.6474	176.982	253.81	46.1546	105.453	223.137	359.264	87	93
80	D	L	77.296	73.1689	187.114	270.434	54.9608	99.1685	242.075	369.602	90	92
80	D	M	77.7687	72.8435	155.393	231.59	44.4214	86.3383	199.815	317.928	93	91
80	D	N	86.4416	75.9366	157.253	225.73	24.6652	71.5311	181.918	297.261	91	99
80	D	P	77.3083	67.5458	136.594	193.246	40.0935	92.8502	176.688	286.096	76	74
80	D	Q	78.8026	73.0953	175.903	248.556	47.3167	91.4877	223.22	340.043	89	92
80	D	R	76.4415	69.7227	230.216	309.634	70.9501	134.46	301.166	444.094	101	104
80	D	S	83.8087	71.0914	177.298	236.441	34.2528	96.1463	211.551	332.587	81	85
80	D	T	88.2258	74.5357	173.034	221.546	23.0923	75.6888	196.127	297.234	82	78
80	D	V	70.5096	64.7765	168.368	233.081	70.4191	126.742	238.787	359.823	94	91
80	D	W	80.9245	70.8603	180.12	243.93	42.4578	100.311	222.577	344.24	94	95
80	D	Y	74.1722	68.73	132.69	169.289	46.2047	77.0212	178.895	246.31	82	84
81	P	A	80.3246	75.8755	231.248	323.822	56.6438	102.959	287.892	426.781	114	113
81	P	C	80.625	75.311	150.832	217.016	36.2464	71.1438	187.078	288.16	71	78
81	P	D	84.9406	75.2294	222.601	306.412	39.4657	100.892	262.067	407.304	114	117
81	P	E	83.0173	78.2343	220.379	344.183	45.0826	95.7555	265.461	439.938	124	125
81	P	F	81.0848	75.1822	207.144	285.323	48.3219	94.186	255.466	379.509	105	105
81	P	G	80.4172	80.0661	226.987	342.197	55.2747	85.1962	282.262	427.394	104	109
81	P	H	77.9482	73.372	254.547	367.561	72.012	133.395	326.559	500.956	112	123
81	P	I	78.1835	79.3404	238.777	341.01	66.6288	88.7961	305.406	429.806	119	117
81	P	K	83.5335	74.9509	190.228	261.275	37.4987	87.3201	227.727	348.596	91	93
81	P	L	77.6565	74.9728	190.184	256.538	54.7203	85.637	244.905	342.175	94	96
81	P	M	77.0809	72.3303	184.64	259.451	54.9006	99.2519	239.541	358.703	102	103
81	P	N	82.976	77.8781	240.374	325.53	49.3171	92.4695	289.691	417.999	120	116
81	P	Q	81.2746	70.5392	203.501	291.207	46.886	121.623	250.387	412.83	109	111
81	P	R	80.9398	77.8314	132.48	198.518	31.1972	56.5437	163.677	255.062	90	89
81	P	S	79.8555	75.6353	198.571	288.546	50.0918	92.9504	248.663	381.496	91	96
81	P	T	80.9062	75.3902	230.678	317.647	54.4398	103.69	285.117	421.337	116	121
81	P	V	81.67	80.6557	155.516	232.081	34.904	55.662	190.42	287.743	90	96
81	P	W	80.9426	70.9972	75.1878	105.97	17.7025	43.2894	92.8902	149.259	47	52
81	P	Y	78.2861	77.9301	180.43	261.802	50.0451	74.1426	230.475	335.944	91	93
82	T	A	82.8792	73.0891	171.341	248.994	35.3949	91.6781	206.736	340.672	98	101
82	T	C	81.8422	77.1445	190.436	266.96	42.2508	79.0917	232.687	346.052	113	118
82	T	D	81.4276	79.2417	177.921	261.077	40.5811	68.392	218.502	329.469	109	109
82	T	E	79.0731	75.9174	135.369	201.828	35.8257	64.024	171.195	265.852	67	70
82	T	F	78.2659	73.8951	191.231	251.298	53.104	88.7761	244.335	340.074	106	99
82	T	G	77.6281	74.2123	187.88	267.264	54.1459	92.8702	242.026	360.134	95	89
82	T	H	83.1026	73.8116	212.49	308.57	43.2059	109.481	255.695	418.051	118	120
82	T	I	75.1072	70.136	226.949	308.479	75.2179	131.351	302.167	439.83	110	111
82	T	K	79.531	79.9	102.452	149.779	26.3683	37.6791	128.821	187.458	65	62
82	T	L	85.7098	73.5315	127.667	180.313	21.2857	64.9056	148.953	245.218	61	63
82	T	M	78.2029	72.2343	97.0835	133.471	27.0596	51.304	124.143	184.775	50	57
82	T	N	83.7519	77.3388	169.587	229.011	32.9003	67.103	202.487	296.114	102	105
82	T	P	82.2034	76.7184	317.866	451.021	68.8162	136.871	386.682	587.892	148	138
82	T	Q	76.9306	72.4727	136.597	204.168	40.9618	77.5488	177.559	281.716	73	74
82	T	R	72.783	71.2225	130.293	186.623	48.7227	75.4049	179.015	262.028	66	67
82	T	S	80.9357	74.7442	246.643	336.104	58.0965	113.568	304.74	449.672	123	125
82	T	V	79.1275	73.2495	119.813	164.212	31.6046	59.9699	151.417	224.182	62	64
82	T	W	74.1388	70.8847	147.662	218.104	51.5078	89.5842	199.17	307.688	72	72
82	T	Y	83.9866	73.5786	232.42	327.723	44.3146	117.682	276.735	445.405	149	146
83	G	A	77.9231	71.3817	136.989	204.606	38.8111	82.0304	175.8	286.637	68	67
83	G	C	78.5357	76.1708	185.114	254.591	50.5927	79.646	235.707	334.237	110	108
83	G	D	80.2662	79.0121	151.832	229.537	37.3284	60.9718	189.16	290.509	95	95
83	G	E	81.0576	74.1879	176.368	251.95	41.2156	87.6607	217.584	339.611	84	88
83	G	F	85.3132	75.598	149.911	216.422	25.8073	69.8581	175.718	286.281	99	98
83	G	H	80.9269	71.6195	179.851	258.81	42.3877	102.558	222.238	361.368	98	97
83	G	I	81.3649	79.9305	164.166	244.985	37.5989	61.5128	201.765	306.498	102	102
83	G	K	82.9739	76.7516	159.879	218.291	32.8068	66.1212	192.686	284.412	82	81
83	G	L	84.418	74.5493	202.413	274.399	37.3618	93.6784	239.775	368.077	97	94
83	G	M	79.3557	74.1317	165.388	229.718	43.0255	80.1603	208.413	309.879	92	93
83	G	N	79.2255	78.0989	186.904	266.618	49.0098	74.7671	235.913	341.385	104	102
83	G	P	76.163	78.1883	146.831	206.606	45.9542	57.6357	192.786	264.242	71	70
83	G	Q	81.9314	79.6145	216.297	304.219	47.7008	77.8961	263.998	382.115	115	109
83	G	R	86.1189	75.5709	144.384	202.624	23.2727	65.5001	167.657	268.124	82	90
83	G	S	82.0378	74.2677	186.868	231.028	40.915	80.0467	227.783	311.075	98	98
83	G	T	78.2627	74.4598	214.58	317.603	59.5993	108.94	274.18	426.542	100	95
83	G	V	79.638	75.391	189.763	271.592	48.5189	88.6525	238.282	360.244	114	116
83	G	W	78.7291	75.7384	175.947	257.047	47.5371	82.3409	223.484	339.388	93	96
83	G	Y	74.1066	71.331	149.498	227.081	52.2358	91.2673	201.734	318.348	86	88
84	P	A	73.8529	74.7909	133.647	188.412	47.3167	63.5064	180.963	251.919	71	70
84	P	C	75.6706	76.9561	140.738	190.681	45.2496	57.098	185.987	247.779	71	70
84	P	D	75.5627	69.7063	134.568	203.138	43.5198	88.2818	178.088	291.42	63	64
84	P	E	83.8379	76.3111	166.455	231.3	32.0888	71.8016	198.544	303.102	78	75
84	P	F	77.6301	71.3992	173.23	250.866	49.9182	100.491	223.149	351.356	75	72
84	P	G	80.8224	78.0401	160.639	231.988	38.1165	65.2797	198.756	297.267	79	78
84	P	H	79.5474	75.7828	181.772	273.188	46.7357	87.3	228.507	360.488	97	96
84	P	I	76.2876	73.5106	134.404	176.394	41.7766	63.5632	176.181	239.957	77	73
84	P	K	84.4286	72.6383	186.86	259.074	34.4632	97.5889	221.323	356.663	93	93
84	P	L	78.3606	77.3131	129.006	192.623	35.6253	56.5236	164.631	249.147	85	78
84	P	M	77.2495	73.4866	157.841	240.634	46.4852	86.8192	204.326	327.453	90	90
84	P	N	79.1497	72.9764	208.331	312.442	54.8806	115.699	263.212	428.14	79	77
84	P	Q	80.5326	74.2178	166.604	232.099	40.2738	80.6278	206.878	312.726	94	92
84	P	R	80.4699	75.482	221.502	296.4	53.7585	96.2765	275.26	392.676	93	104
84	P	S	84.4444	71.6794	174.722	243.152	32.1857	96.0694	206.907	339.221	94	98
84	P	T	83.1387	75.6243	193.492	271.372	39.2419	87.4703	232.734	358.843	89	91
84	P	V	82.5436	72.4402	142.875	187.728	30.2154	71.4209	173.091	259.149	75	73
84	P	W	79.1821	70.7571	190.184	273.144	50.0017	112.887	240.186	386.031	102	101
84	P	Y	82.2371	70.4073	183.178	267.311	39.5659	112.353	222.744	379.663	93	94
85	K	A	83.7764	77.8021	130.989	194.834	25.3665	55.5886	156.355	250.422	67	72
85	K	C	76.6866	75.3397	156.423	215.086	47.5538	70.4024	203.976	285.489	72	77
85	K	D	82.2918	75.6893	160.806	216.344	34.6034	69.4874	195.409	285.831	82	84
85	K	E	13.4866	10.588	44.5635	49.5637	285.864	418.547	330.428	468.111	86	79
85	K	F	74.2958	70.2215	142.2	193.816	49.1969	82.1907	191.397	276.007	75	75
85	K	G	82.2158	74.3998	131.41	192.629	28.4254	66.2815	159.835	258.91	64	63
85	K	H	79.939	78.6519	201.202	290.558	50.4926	78.8646	251.695	369.422	97	99
85	K	I	77.6784	74.2331	166.648	259.617	47.8878	90.1152	214.536	349.733	89	92
85	K	L	74.4234	74.8981	186.746	260.363	64.1776	87.26	250.923	347.623	103	103
85	K	M	81.799	71.4256	152.183	223.677	33.8621	89.484	186.045	313.161	77	77
85	K	N	79.9306	76.7029	147.551	217.168	37.0479	65.9609	184.599	283.129	83	86
85	K	P	77.3754	74.7385	178.096	262.732	52.0755	88.8028	230.172	351.534	101	99
85	K	Q	80.2453	76.1562	186.711	248.819	45.9643	77.9028	232.675	326.722	84	90
85	K	R	75.5157	68.9957	161.85	219.177	52.4762	98.4906	214.326	317.668	80	83
85	K	S	79.0757	73.1188	194.869	278.066	51.5645	102.227	246.433	380.293	91	94
85	K	T	78.9694	75.0335	157.735	208.413	42.007	69.3471	199.743	277.76	74	75
85	K	V	83.6851	79.7578	162.797	231.081	31.7382	58.6475	194.535	289.729	98	92
85	K	W	77.7381	66.7499	165.824	223.967	47.4871	111.565	213.311	335.531	88	83
85	K	Y	72.274	74.2474	146.349	208.369	56.1429	72.2725	202.492	280.642	78	79
86	E	A	84.7015	74.8962	57.1869	78.4598	10.3289	26.2982	67.5158	104.758	25	26
86	E	C	77.0351	67.7647	111.058	162.095	33.1074	77.108	144.165	239.203	74	78
86	E	D	81.0463	76.4307	113.865	159.709	26.6288	49.2503	140.494	208.96	81	84
86	E	F	74.2765	64.5428	125.895	161.721	43.5999	88.8429	169.495	250.564	88	88
86	E	G	74.4708	65.6921	117.102	173.184	40.1436	90.4458	157.246	263.629	69	63
86	E	H	79.837	74.7713	139.673	215.177	35.2747	72.6031	174.948	287.78	82	87
86	E	I	76.3635	75.556	129.942	185.594	40.2204	60.0434	170.162	245.637	73	74
86	E	K	83.448	75.0476	155.06	229.09	30.7564	76.1696	185.816	305.259	95	97
86	E	L	74.7476	70.8767	161.242	235.005	54.4732	96.5637	215.715	331.569	90	84
86	E	M	86.7451	74.8569	111.415	155.797	17.0245	52.3293	128.439	208.126	69	66
86	E	N	81.5509	72.9796	136.971	209.299	30.9868	77.4921	167.958	286.791	85	83
86	E	P	72.5436	79.572	189.401	259.796	71.6847	66.6956	261.085	326.491	96	91
86	E	Q	86.5041	76.5724	121.365	181.93	18.9347	55.662	140.3	237.592	61	72
86	E	R	74.432	71.8471	193.693	271.387	66.5353	106.342	260.229	377.729	93	92
86	E	S	77.2367	77.4251	130.146	179.886	38.357	52.4495	168.503	232.335	69	69
86	E	T	76.2101	71.4384	177.669	237.432	55.4617	94.9274	233.131	332.36	91	95
86	E	V	76.8485	71.9711	134.682	196.922	40.5744	76.6906	175.256	273.612	87	88
86	E	W	74.1234	69.8351	160.879	227.73	56.163	98.367	217.042	326.097	104	100
86	E	Y	71.6285	73.6893	130.866	177.921	51.835	63.5265	182.701	241.447	82	83

## Sheet: Tat Activities Jurkat
Sample #			1	2	1	2	1	2	1	2	1	2
Position	Ref AA	Alt AA	%GFP+ rpm	%GFP+ rpm	GFP+ rpm	GFP+ rpm	GFP- rpm	GFP- rpm	Total rpm	Total rpm	Barcode #	Barcode #
2	E	A	18.7218	23.4557	116.172	94.3553	504.345	307.914	620.517	402.27	145	145
2	E	C	22.1064	23.8439	153.925	102.034	542.368	325.891	696.293	427.925	167	168
2	E	D	77.7703	79.1913	336.402	234.555	96.1563	61.633	432.558	296.188	142	146
2	E	F	37.9338	41.22	214.724	156.007	351.324	222.468	566.048	378.475	157	161
2	E	G	22.4523	25.2387	113.69	78.6879	392.67	233.087	506.359	311.775	154	147
2	E	H	39.6226	44.7569	164.797	122.392	251.12	151.067	415.918	273.459	141	140
2	E	I	30.9351	37.0872	163.908	132.082	365.937	224.057	529.846	356.14	158	157
2	E	K	26.7306	30.8836	123.918	86.0216	339.663	192.513	463.581	278.535	132	121
2	E	L	42.5575	43.54	194.027	138.068	261.89	179.038	455.917	317.106	139	138
2	E	M	55.1027	57.9846	220.3	161.323	179.499	116.894	399.799	278.218	125	122
2	E	N	68.7559	70.4854	351.42	241.766	159.693	101.236	511.113	343.001	157	165
2	E	P	17.9288	21.9316	93.9459	66.9798	430.048	238.424	523.994	305.404	143	136
2	E	Q	66.5195	73.2119	240.169	171.236	120.882	62.6549	361.051	233.891	132	128
2	E	R	25.0744	27.0485	114.163	83.0127	341.135	223.89	455.299	306.903	119	130
2	E	S	48.6987	54.6535	247.193	175.692	260.404	145.774	507.597	321.466	144	142
2	E	T	75.4335	76.9016	422.406	303.412	137.566	91.1337	559.971	394.546	162	152
2	E	V	39.0852	48.3608	155.446	112.532	242.264	120.16	397.71	232.692	137	128
2	E	W	34.608	34.9056	140.638	96.3817	265.737	179.739	406.375	276.121	114	110
2	E	Y	38.2833	47.523	188.105	142.866	303.246	157.759	491.351	300.626	150	144
3	P	A	64.1578	68.6082	151.121	119.988	84.4248	54.9006	235.546	174.889	92	83
3	P	C	60.8423	64.2333	218.8	166.329	140.818	92.6164	359.618	258.946	129	124
3	P	D	38.2648	44.4055	143.235	107.958	231.09	135.161	374.325	243.119	112	118
3	P	E	54.3552	59.6423	209.788	146.989	176.17	99.4623	385.957	246.452	119	115
3	P	F	64.5751	68.3123	221.192	160.686	121.342	74.5366	342.534	235.223	123	123
3	P	G	31.7841	32.31	65.7926	47.8327	141.206	100.21	206.998	148.043	77	75
3	P	H	32.3289	38.6322	166.806	109.882	349.16	174.55	515.966	284.432	139	134
3	P	I	73.3307	81.6407	214.057	153.311	77.8494	34.4765	291.906	187.788	103	94
3	P	K	22.0512	24.0927	128.187	89.244	453.131	281.175	581.318	370.419	145	140
3	P	L	76.5248	78.2822	255.582	179.149	78.4037	49.7011	333.986	228.85	115	113
3	P	M	71.0773	73.1866	210.583	156.978	85.6904	57.5121	296.273	214.49	111	103
3	P	N	28.6055	33.3277	140.135	98.1918	349.754	196.433	489.89	294.625	139	138
3	P	Q	49.8115	60.005	183.719	125.822	185.109	83.8637	368.829	209.685	112	115
3	P	R	17.9988	24.2753	81.0652	60.1344	369.327	187.584	450.392	247.718	105	108
3	P	S	47.5869	50.519	123.637	79.9804	136.176	78.3369	259.814	158.317	97	96
3	P	T	51.8051	57.877	187.614	136.936	174.54	99.6627	362.154	236.599	146	132
3	P	V	76.0006	75.0499	231.514	177.657	73.1074	59.0616	304.621	236.719	103	100
3	P	W	49.6582	53.5258	189.839	125.708	192.453	109.147	382.292	234.854	122	116
3	P	Y	65.0665	66.2076	251.363	172.207	134.954	87.8945	386.317	260.101	115	116
4	V	A	42.2445	48.0843	158.551	109.891	216.767	118.648	375.319	228.539	114	116
4	V	C	55.0336	58.9791	229.818	155.768	187.778	108.339	417.595	264.106	146	141
4	V	D	25.4335	29.2793	110.926	83.8548	325.216	202.541	436.142	286.396	147	143
4	V	E	23.1755	25.9982	110.716	72.0999	367.013	205.226	477.729	277.326	145	131
4	V	F	35.4855	37.702	169.42	114.584	308.015	189.337	477.435	303.921	146	144
4	V	G	21.6722	25.0897	68.126	47.2917	246.221	141.199	314.347	188.491	88	85
4	V	H	33.5309	39.5756	137.34	103.385	272.252	157.849	409.592	261.234	129	118
4	V	I	69.2933	79.2945	241.608	174.07	107.066	45.4533	348.674	219.523	124	121
4	V	K	15.7608	18.8038	85.6064	56.6986	457.552	244.829	543.158	301.527	137	127
4	V	L	37.7585	43.5901	123.655	86.8374	203.834	112.376	327.489	199.213	115	120
4	V	M	40.1924	44.9354	123.901	94.5659	184.368	115.882	308.269	210.448	100	99
4	V	N	23.354	26.9693	101.993	70.6583	334.734	191.337	436.727	261.996	122	113
4	V	P	37.0185	41.2251	189.079	136.96	321.69	195.265	510.769	332.224	143	135
4	V	Q	39.6919	43.0153	134.334	101.145	204.107	133.992	338.441	235.137	128	129
4	V	R	15.9599	22.3159	81.3079	62.9094	428.145	218.995	509.453	281.904	133	126
4	V	S	24.8916	31.3523	98.297	68.0441	296.604	148.986	394.901	217.031	102	104
4	V	T	51.9962	55.7403	215.425	145.34	198.885	115.405	414.31	260.745	145	144
4	V	W	24.4798	28.9225	89.9691	67.7751	277.555	166.559	367.525	234.334	97	89
4	V	Y	40.3671	47.2287	151.639	111.742	224.011	124.856	375.649	236.598	133	133
5	D	A	23.8239	28.9126	105.198	79.3458	336.367	195.088	441.565	274.433	118	114
5	D	C	36.9436	40.2021	136.1	91.2908	232.299	135.789	368.399	227.08	127	120
5	D	E	64.0249	68.8138	200.869	151.691	112.867	68.746	313.736	220.437	115	116
5	D	F	17.7064	21.0949	79.881	58.3185	371.261	218.14	451.142	276.458	119	115
5	D	G	20.9758	24.4216	84.9251	54.6605	319.947	169.16	404.872	223.821	119	119
5	D	H	32.7317	35.2943	132.375	98.6362	272.049	180.831	404.423	279.468	147	139
5	D	I	17.6454	21.8503	100.426	69.9039	468.706	250.018	569.132	319.922	138	128
5	D	K	17.6756	22.2972	90.3551	66.8365	420.831	232.917	511.187	299.753	125	130
5	D	L	21.5287	25.5426	116.766	85.6999	425.607	249.818	542.373	335.518	124	112
5	D	M	19.4364	26.3262	81.0155	60.2309	335.809	168.556	416.824	228.787	115	107
5	D	N	45.2812	54.6808	199.369	156.235	240.922	129.487	440.291	285.723	127	134
5	D	P	35.9545	39.3723	121.813	88.2088	216.984	135.829	338.797	224.038	110	100
5	D	Q	31.3303	35.1785	124.094	94.3202	271.989	173.799	396.082	268.119	114	119
5	D	R	17.6429	19.6693	90.32	60.7748	421.613	248.208	511.933	308.983	123	120
5	D	S	49.9111	53.6741	203.436	138.872	204.161	119.86	407.597	258.732	147	152
5	D	T	21.3515	25.3809	99.9521	67.4827	368.175	198.397	468.127	265.88	120	120
5	D	V	18.1321	23.7889	110.637	86.1883	499.536	276.116	610.173	362.304	154	154
5	D	W	21.1031	23.6148	101.514	79.9102	379.522	258.481	481.036	338.391	134	132
5	D	Y	16.9126	22.0831	129.12	103.005	634.333	363.436	763.453	466.441	139	139
6	P	A	67.1291	74.3747	207.562	153.498	101.636	52.887	309.199	206.385	96	94
6	P	C	64.0111	68.7255	206.285	150.188	115.979	68.3453	322.264	218.534	113	116
6	P	D	45.9843	53.3248	169.973	121.865	199.659	106.669	369.632	228.534	118	108
6	P	E	42.993	47.052	152.627	112.976	202.378	127.133	355.005	240.109	124	125
6	P	F	77.5563	81.5295	235.666	163.885	68.1984	37.1281	303.864	201.013	106	99
6	P	G	59.492	64.6069	161.505	126.392	109.968	69.2403	271.473	195.632	102	102
6	P	H	74.037	79.197	289.943	200.273	101.676	52.6064	391.62	252.879	113	114
6	P	I	55.834	59.9316	177.277	126.801	140.23	84.7754	317.508	211.577	94	95
6	P	K	16.724	20.7939	79.4131	64.0732	395.432	244.061	474.845	308.134	125	126
6	P	L	42.6574	43.5256	153.928	105.496	206.919	136.881	360.848	242.377	125	117
6	P	M	58.8106	62.9404	217.425	153.224	152.279	90.2187	369.705	243.442	137	126
6	P	N	52.1183	54.8329	163.259	109.631	149.988	90.3055	313.247	199.936	113	113
6	P	Q	47.3135	51.6996	116.795	93.8728	130.058	87.7008	246.853	181.574	113	112
6	P	R	26.7911	29.5704	90.1095	62.152	246.231	148.031	336.341	210.183	117	108
6	P	S	58.4583	66.5159	152.428	109.882	108.319	55.3147	260.747	165.197	105	98
6	P	T	63.3913	68.7292	180.763	137.884	104.391	62.735	285.154	200.619	114	114
6	P	V	64.7719	70.7783	235.14	169.277	127.888	69.8881	363.028	239.165	120	110
6	P	W	87.2435	92.1356	292.704	211.893	42.7985	18.0865	335.502	229.98	114	109
6	P	Y	80.2935	81.9232	267.668	195.202	65.6938	43.0723	333.361	238.274	95	94
7	R	A	85.645	89.4771	353.251	250.848	59.2085	29.5007	412.459	280.349	116	109
7	R	C	83.014	85.7386	318.594	224.116	65.1895	37.2783	383.783	261.394	133	128
7	R	D	88.0847	89.5969	310.219	214.039	41.9636	24.8522	352.183	238.892	121	105
7	R	E	90.0619	89.0661	337.01	230.409	37.1882	28.2852	374.198	258.694	115	106
7	R	F	79.4915	86.2354	208.214	151.557	53.7185	24.191	261.933	175.748	91	94
7	R	G	82.8879	85.1523	332.507	237.178	68.6458	41.3558	401.153	278.534	104	99
7	R	H	81.0097	84.7232	407.025	293.768	95.4149	52.9704	502.44	346.739	140	138
7	R	I	72.8416	80.5553	226.247	174.815	84.3546	42.1974	310.602	217.013	111	110
7	R	K	74.4319	79.1534	350.034	250.45	120.24	65.9609	470.274	316.411	143	137
7	R	L	86.5398	89.1448	379.252	272.048	58.9881	33.1274	438.24	305.175	121	121
7	R	M	81.6403	85.1614	373.632	263.74	84.024	45.9542	457.656	309.695	132	126
7	R	N	85.8631	86.9181	417.055	298.137	68.6659	44.8723	485.721	343.009	126	120
7	R	P	21.0708	26.6118	120.737	92.981	452.269	256.417	573.006	349.398	140	136
7	R	Q	83.9107	84.4992	421.16	302.774	80.7547	55.5418	501.915	358.316	138	134
7	R	S	86.9697	87.3305	416.581	301.225	62.4144	43.7001	478.995	344.925	141	142
7	R	T	84.6411	87.0168	411.204	295.979	74.6168	44.161	485.82	340.14	137	137
7	R	V	77.3186	83.2277	330.337	241.076	96.9043	48.5824	427.242	289.658	135	132
7	R	W	79.3864	83.9052	323.822	233.353	84.0841	44.7621	407.906	278.115	130	132
7	R	Y	80.5914	84.7299	395.253	277.984	95.1878	50.0985	490.44	328.082	157	155
8	L	A	45.2799	49.0984	179.424	121.83	216.831	126.305	396.254	248.135	127	127
8	L	C	57.7566	59.3712	165.429	119.579	120.995	81.83	286.424	201.409	124	126
8	L	D	37.8618	45.0768	159.271	113.567	261.393	138.374	420.663	251.94	131	132
8	L	E	50.5418	59.8536	204.273	146.036	199.893	97.9529	404.166	243.989	136	133
8	L	F	34.9529	39.5619	111.575	78.0124	207.641	119.178	319.216	197.191	114	116
8	L	G	18.4836	21.7949	94.7472	77.3721	417.853	277.629	512.6	355.001	145	142
8	L	H	32.4148	34.1174	101.005	70.1524	210.596	135.468	311.601	205.621	125	112
8	L	I	75.0128	79.0792	285.478	211.194	95.0943	55.8724	380.573	267.067	133	138
8	L	K	33.1971	42.1785	125.263	99.7591	252.069	136.757	377.332	236.516	135	131
8	L	M	66.0355	76.2239	188.14	130.848	96.7674	40.8148	284.908	171.663	98	97
8	L	N	38.0039	41.8081	97.876	71.2431	159.666	99.1618	257.542	170.405	112	104
8	L	P	17.44	19.8152	112.391	80.0476	532.055	323.924	644.447	403.971	141	143
8	L	Q	50.3278	56.5199	173.21	122.988	170.953	94.6134	344.163	217.602	126	127
8	L	R	28.0477	33.9421	108.812	78.8985	279.142	153.551	387.954	232.45	133	138
8	L	S	34.0111	41.1804	114.578	84.6122	222.308	120.855	336.886	205.467	122	121
8	L	T	73.3334	75.1042	252.474	175.312	91.8083	58.1132	344.282	233.426	126	129
8	L	V	70.0484	75.9057	253.889	190.158	108.559	60.3607	362.448	250.519	139	137
8	L	W	43.257	50.1356	162.639	119.175	213.344	118.531	375.984	237.706	128	122
8	L	Y	31.1559	38.9895	142.533	101.016	314.951	158.07	457.484	259.086	152	157
9	E	A	80.1377	86.4692	333.472	233.555	82.6515	36.547	416.123	270.102	118	123
9	E	C	53.6057	58.7294	185.734	134.41	160.748	94.4531	346.482	228.863	148	145
9	E	D	76.0337	79.489	237.169	174.482	74.757	45.0225	311.926	219.504	130	119
9	E	F	17.5153	21.0926	115.701	91.3961	544.872	341.913	660.574	433.31	149	149
9	E	G	39.9502	48.0211	169.692	127.708	255.068	138.233	424.76	265.941	138	137
9	E	H	19.912	24.5295	115.163	84.5566	463.199	260.157	578.362	344.714	162	160
9	E	I	18.1906	23.1267	131.597	99.1626	591.838	329.618	723.435	428.78	169	166
9	E	K	23.4141	25.7846	119.427	96.373	390.636	277.389	510.063	373.761	162	149
9	E	L	24.7629	28.0267	125.471	84.7847	381.219	217.729	506.69	302.514	137	134
9	E	M	57.6792	58.6317	254.635	190.439	186.832	134.366	441.467	324.805	151	143
9	E	N	26.2654	29.3875	120.707	83.7057	338.861	201.129	459.569	284.834	154	145
9	E	P	83.4099	84.9477	392.007	274.966	77.9696	48.7227	469.976	323.689	150	139
9	E	Q	50.9845	57.1179	196.974	149.375	189.367	112.146	386.341	261.521	164	159
9	E	R	22.7185	23.2711	104.61	72.2578	355.852	238.247	460.463	310.505	144	146
9	E	S	67.5494	72.5877	309.172	222.929	148.526	84.1877	457.698	307.116	147	143
9	E	T	33.1966	36.1001	159.891	110.461	321.757	195.525	481.647	305.986	156	147
9	E	V	68.2708	72.5342	398.791	287.75	185.34	108.96	584.13	396.71	185	179
9	E	W	17.1661	18.9521	114.058	80.2318	550.379	343.109	664.437	423.341	175	173
9	E	Y	18.591	21.6032	99.0047	74.1438	433.535	269.063	532.539	343.207	151	150
10	P	A	73.5589	79.0019	250.784	182.658	90.1453	48.549	340.929	231.207	103	105
10	P	C	61.3647	64.8566	153.314	102.908	96.527	55.7622	249.841	158.671	104	100
10	P	D	20.7549	23.3217	69.1787	47.5286	264.134	156.266	333.313	203.795	108	108
10	P	E	27.6146	34.8037	130.035	94.9928	340.858	177.946	470.894	272.939	138	142
10	P	F	16.4511	19.6881	64.7662	47.9672	328.923	195.669	393.689	243.636	98	98
10	P	G	39.8001	45.8493	108.452	75.486	164.041	89.1534	272.493	164.639	91	96
10	P	H	28.6234	35.5266	107.847	76.8106	268.933	139.396	376.78	216.206	99	107
10	P	I	46.6894	55.2369	132.173	90.8025	150.917	73.5849	283.09	164.387	116	109
10	P	K	63.8415	75.6315	249.041	183.763	141.052	59.2085	390.093	242.972	130	123
10	P	L	21.0103	24.2425	98.4871	69.398	370.269	216.868	468.756	286.266	108	103
10	P	M	19.6529	20.4894	64.4299	42.7973	263.41	166.078	327.839	208.875	106	108
10	P	N	79.7192	82.741	285.584	191.395	72.6532	39.9232	358.237	231.318	120	115
10	P	Q	40.6863	51.5035	172.964	129.962	252.152	122.374	425.117	252.337	119	120
10	P	R	37.0767	43.7824	177.438	128.418	301.132	164.892	478.57	293.311	155	137
10	P	S	76.1992	76.7886	229.555	177.315	71.7014	53.5983	301.256	230.914	115	116
10	P	T	42.0378	46.6754	128.374	96.7239	177.004	110.503	305.379	207.226	89	92
10	P	V	32.2361	38.7101	114.187	82.5361	240.033	130.68	354.22	213.216	127	126
10	P	W	14.6863	18.469	70.939	48.6339	412.089	214.694	483.028	263.327	111	109
10	P	Y	17.9981	21.3633	85.118	57.0904	387.811	210.145	472.929	267.236	99	98
11	W	A	68.1599	66.1673	235.537	164.008	110.028	83.8604	345.566	247.868	112	107
11	W	C	52.5985	53.3068	136.936	101.198	123.406	88.6425	260.342	189.84	104	115
11	W	D	38.1837	41.5864	142.703	107.333	231.024	150.763	373.726	258.096	117	118
11	W	E	55.5188	63.4503	206.747	155.744	165.644	89.7145	372.39	245.459	138	131
11	W	F	33.4553	36.3709	140.621	103.645	279.703	181.322	420.323	284.968	120	121
11	W	G	42.8875	44.1358	171.692	113.874	228.639	144.134	400.331	258.008	120	118
11	W	H	34.7832	35.2598	125.994	87.7527	236.233	161.122	362.227	248.875	119	112
11	W	I	17.668	19.9897	69.2781	50.3532	322.832	201.543	392.11	251.896	117	109
11	W	K	18.7659	23.3117	78.2756	60.4327	338.841	198.804	417.117	259.237	127	128
11	W	L	17.423	20.5595	83.8811	65.2838	397.559	252.252	481.44	317.536	125	122
11	W	M	38.3946	42.462	131.638	86.9164	211.217	117.776	342.855	204.692	95	100
11	W	N	26.3372	32.7091	121.9	87.1562	340.945	179.302	462.845	266.458	120	118
11	W	P	23.3206	25.4314	131.246	90.0627	431.544	264.077	562.79	354.14	137	129
11	W	Q	43.5076	46.9536	203.176	146.051	263.814	165.002	466.99	311.053	150	148
11	W	R	22.4163	22.8109	105.549	68.3015	365.31	231.124	470.859	299.425	127	130
11	W	S	60.2555	64.5457	182.263	136.006	120.22	74.707	302.483	210.713	111	101
11	W	T	23.4538	31.0522	104.783	77.5884	341.98	172.276	446.763	249.864	112	111
11	W	V	24.2746	25.6022	85.5479	60.5292	266.869	175.892	352.417	236.422	97	94
11	W	Y	58.0602	60.2152	176.693	123.094	127.634	81.3291	304.327	204.423	111	103
12	K	A	81.9389	88.259	285.674	196.307	62.9688	26.1145	348.643	222.422	103	100
12	K	C	75.9214	73.8861	264.059	172.172	83.7469	60.8516	347.806	233.023	130	126
12	K	D	79.658	80.1664	336.84	247.012	86.0177	61.112	422.858	308.124	135	127
12	K	E	82.32	87.9285	319.155	233.66	68.5457	32.0788	387.701	265.739	126	124
12	K	F	70.4767	80.2029	187.752	149.738	78.6508	36.9611	266.402	186.699	95	94
12	K	G	41.443	50.4931	141.586	102.765	200.053	100.758	341.639	203.523	111	104
12	K	H	80.8275	84.6977	276.811	206.501	65.6604	37.3084	342.472	243.809	105	114
12	K	I	63.8642	67.1939	133.98	95.4168	75.809	46.5854	209.789	142.002	82	81
12	K	L	82.5835	86.9168	384.878	268.951	81.1688	40.4842	466.047	309.435	115	111
12	K	M	76.9155	81.1409	196.343	147.674	58.928	34.3229	255.271	181.997	83	78
12	K	N	89.3692	84.9689	278.434	193.571	33.1207	34.2428	311.555	227.813	112	105
12	K	P	15.4077	17.998	69.9916	50.6924	384.271	230.963	454.263	281.656	114	111
12	K	Q	80.302	85.9659	315.05	221.537	77.2817	36.1663	392.332	257.703	120	118
12	K	R	79.9025	83.8421	224.923	163.595	56.5737	31.5278	281.497	195.123	77	80
12	K	S	75.6618	76.9234	209.168	158.56	67.2833	47.5672	276.451	206.127	113	109
12	K	T	60.4141	62.5886	139.945	96.1887	91.6981	57.4954	231.643	153.684	96	95
12	K	V	57.0871	63.4267	209.694	151.955	157.629	87.6206	367.323	239.575	111	111
12	K	W	58.4472	69.7394	302.321	226.291	214.934	98.19	517.255	324.481	147	140
12	K	Y	58.8761	62.2035	232.414	161.876	162.338	98.3603	394.752	260.236	120	113
13	H	A	26.9342	31.5861	107.099	77.1732	290.533	167.153	397.631	244.326	114	113
13	H	C	22.8277	25.0658	113.508	70.6875	383.73	211.321	497.238	282.008	147	140
13	H	D	14.8442	18.1501	70.8542	57.5027	406.465	259.315	477.319	316.818	113	117
13	H	E	18.0764	20.9648	73.8719	53.7657	334.794	202.692	408.666	256.457	111	110
13	H	F	17.2962	20.0606	134.158	92.3962	641.496	368.188	775.654	460.584	157	144
13	H	G	17.4209	21.0396	45.5285	32.8203	215.816	123.172	261.344	155.993	62	56
13	H	I	17.9997	23.8353	87.5772	69.3775	398.971	221.693	486.549	291.071	134	129
13	H	K	13.9971	18.2562	66.8102	53.213	410.503	238.267	477.313	291.48	137	125
13	H	L	28.1994	32.087	109.628	80.2406	279.132	169.831	388.76	250.072	119	123
13	H	M	52.3342	59.0222	214.338	152.861	195.218	106.128	409.555	258.989	134	123
13	H	N	24.9789	30.873	127.024	103.075	381.499	230.793	508.523	333.868	125	125
13	H	P	14.6137	17.4156	95.3554	70.7139	557.151	335.325	652.507	406.039	156	158
13	H	Q	73.173	72.8179	280.364	199.676	102.788	74.5366	383.153	274.213	134	127
13	H	R	31.6558	36.8007	125.33	93.6711	270.586	160.865	395.916	254.536	118	113
13	H	S	19.2553	22.6269	94.4489	76.9802	396.059	263.236	490.508	340.216	140	133
13	H	T	17.8326	22.6981	111.485	86.1678	513.688	293.458	625.173	379.626	142	140
13	H	V	18.0636	22.184	90.7587	73.8748	411.681	259.135	502.44	333.01	136	135
13	H	W	42.7696	50.8921	168.447	117.175	225.4	113.067	393.846	230.242	136	130
13	H	Y	20.8886	23.6385	102.242	74.214	387.22	239.739	489.461	313.954	128	118
14	P	A	37.5366	42.0211	156.639	111.725	260.658	154.153	417.297	265.877	134	131
14	P	C	26.3214	29.638	121.737	79.881	340.765	189.641	462.501	269.522	115	107
14	P	D	27.279	29.296	115.21	80.805	307.13	195.018	422.34	275.822	137	128
14	P	E	37.6738	41.7327	155.551	106.479	257.338	148.666	412.89	255.145	130	131
14	P	F	14.6773	20.8829	69.0325	47.8327	401.302	181.219	470.335	229.052	106	111
14	P	G	29.4089	30.7936	115.193	78.1791	276.5	175.702	391.693	253.881	121	122
14	P	H	28.2334	31.153	104.329	78.53	265.196	173.548	369.526	252.078	119	117
14	P	I	24.8813	25.6881	104.654	75.7112	315.959	219.022	420.613	294.733	112	111
14	P	K	25.4338	31.8515	114.771	85.3666	336.483	182.648	451.255	268.015	132	127
14	P	L	20.4986	23.2287	111.575	85.7058	432.733	283.259	544.309	368.965	141	142
14	P	M	26.8612	30.5531	104.759	74.6936	285.243	169.778	390.002	244.471	113	117
14	P	N	24.0951	34.0499	117.555	100.525	370.326	194.704	487.881	295.229	134	124
14	P	Q	33.673	36.7262	149.06	100.75	293.608	173.578	442.668	274.329	138	134
14	P	R	24.8922	28.2567	115.698	82.1442	349.1	208.562	464.798	290.707	127	116
14	P	S	27.7121	33.773	88.2088	68.126	230.095	133.592	318.304	201.718	108	102
14	P	T	33.5418	35.8369	168.745	112.997	334.343	202.311	503.088	315.307	146	140
14	P	V	25.8043	30.7312	125.866	93.3319	361.903	210.372	487.769	303.704	116	102
14	P	W	19.6412	20.7068	97.1683	67.4652	397.549	258.347	494.717	325.812	129	133
14	P	Y	16.8628	21.6067	78.5476	60.0204	387.257	217.766	465.804	277.786	140	128
15	G	A	22.0799	25.4711	87.934	64.9066	310.319	189.918	398.253	254.825	115	109
15	G	C	18.9754	18.9196	108.356	74.793	462.678	320.528	571.034	395.321	136	129
15	G	D	17.8373	19.7114	56.3097	41.4142	259.375	168.689	315.685	210.103	82	96
15	G	E	16.12	20.927	79.0213	59.9853	411.184	226.655	490.205	286.641	118	118
15	G	F	14.2017	16.8347	78.4774	57.5524	474.116	284.315	552.593	341.867	138	130
15	G	H	16.8441	19.4106	108.023	83.887	533.284	348.285	641.307	432.172	139	136
15	G	I	14.897	16.9461	104.976	77.9043	599.699	381.813	704.675	459.718	127	123
15	G	K	15.6888	20.091	88.6358	64.9446	476.327	258.307	564.962	323.251	127	125
15	G	L	15.184	20.5111	86.0099	64.3071	480.441	249.217	566.451	313.524	111	107
15	G	M	12.8908	18.3551	67.0733	57.3477	453.244	255.088	520.318	312.435	128	116
15	G	N	17.7774	19.4348	81.1617	60.8391	375.381	252.202	456.543	313.041	134	132
15	G	P	31.1912	34.3144	129.304	97.6771	285.25	186.976	414.554	284.653	108	110
15	G	Q	17.0715	19.1685	126.79	83.9455	615.909	353.989	742.699	437.934	153	152
15	G	R	16.1831	18.6824	71.67	46.4846	371.2	202.331	442.871	248.816	117	121
15	G	S	69.1226	77.2957	182.693	122.751	81.6096	36.0561	264.302	158.807	97	91
15	G	T	53.5116	62.5886	218.706	154.51	190.002	92.356	408.708	246.866	133	128
15	G	V	15.1835	18.6765	55.5377	42.2125	310.239	183.807	365.776	226.019	94	95
15	G	W	14.7163	18.9062	78.0212	56.257	452.149	241.302	530.17	297.559	119	111
15	G	Y	14.9604	17.708	96.1624	69.8278	546.615	324.502	642.778	394.329	136	129
16	S	A	71.2744	82.2615	285.499	220.993	115.064	47.654	400.563	268.647	115	115
16	S	C	70.5867	72.7018	218.352	151.604	90.9868	56.9244	309.339	208.528	109	101
16	S	D	14.7442	17.5933	90.0861	66.6055	520.908	311.979	610.994	378.584	120	124
16	S	E	28.1499	33.5329	116.789	86.0918	298.093	170.646	414.882	256.738	117	105
16	S	F	14.4204	17.4484	76.8165	60.0145	455.876	283.941	532.692	343.955	116	123
16	S	G	24.4151	25.5414	100.154	70.5735	310.058	205.737	410.212	276.311	112	116
16	S	H	13.0205	15.3273	52.4001	35.68	350.042	197.108	402.442	232.788	96	93
16	S	I	30.7497	32.5859	123.901	93.7763	279.032	194.006	402.932	287.782	113	115
16	S	K	15.054	19.6205	74.2842	57.608	419.168	236.003	493.453	293.611	110	109
16	S	L	15.1797	17.8856	68.6582	46.587	383.643	213.885	452.301	260.472	105	103
16	S	M	23.3641	25.9522	91.9868	67.2576	301.723	191.902	393.71	259.159	106	106
16	S	N	15.9535	20.4982	93.6799	70.8718	493.525	274.874	587.205	345.746	124	126
16	S	P	13.2495	17.5596	76.3662	55.6985	500.003	261.499	576.369	317.198	129	123
16	S	Q	19.8866	21.5373	64.7399	43.7681	260.805	159.452	325.545	203.22	98	94
16	S	R	14.6748	17.3766	73.0824	58.0027	424.929	275.796	498.011	333.798	124	122
16	S	T	73.6528	77.6756	242.196	180.982	86.6388	52.0154	328.834	232.998	125	123
16	S	V	61.0893	62.568	183.418	131.533	116.827	78.6909	300.245	210.223	120	115
16	S	W	14.2247	18.2174	76.3106	61.5818	460.154	276.457	536.464	338.039	119	109
16	S	Y	14.6807	17.3535	64.506	45.1191	374.887	214.881	439.393	260	102	104
17	Q	A	78.1455	80.1395	378.146	276.294	105.754	68.4722	483.9	344.766	147	147
17	Q	C	63.9267	71.6788	274.949	205.94	155.151	81.3692	430.1	287.309	149	135
17	Q	D	27.2689	33.885	131.252	95.8729	350.072	187.063	481.324	282.936	131	134
17	Q	E	59.1893	62.8884	208.273	148.446	143.603	87.6006	351.876	236.046	126	128
17	Q	F	24.7974	29.4688	114.35	83.0741	346.789	198.831	461.139	281.905	121	124
17	Q	G	61.5765	66.7003	206.448	151.814	128.823	75.7923	335.271	227.606	108	111
17	Q	H	48.3979	50.6155	195.518	132.726	208.462	129.497	403.98	262.223	124	123
17	Q	I	24.901	29.3823	86.6824	62.0731	261.426	149.187	348.108	211.26	95	101
17	Q	K	83.5716	85.1068	385.387	269.416	75.7589	47.1464	461.145	316.563	129	127
17	Q	L	43.6578	53.1424	180.798	137.322	233.328	121.082	414.126	258.404	133	125
17	Q	M	70.0233	76.1689	201.352	148.288	86.198	46.3951	287.55	194.683	90	88
17	Q	N	48.0653	52.1869	203.667	153.437	220.063	140.578	423.731	294.015	133	130
17	Q	P	14.9341	17.8539	129.217	96.6624	736.029	444.745	865.246	541.408	158	164
17	Q	R	80.944	83.9365	351.929	257.661	82.8519	49.3104	434.781	306.972	136	134
17	Q	S	72.8441	68.1369	286.85	198.068	106.936	92.6231	393.786	290.691	126	129
17	Q	T	52.791	58.8615	180.143	133.1	161.095	93.0239	341.238	226.124	126	120
17	Q	V	30.5055	33.9062	122.295	90.9166	278.601	177.225	400.896	268.141	124	128
17	Q	W	22.8139	25.24	110.9	76.4071	375.208	226.315	486.108	302.722	130	129
17	Q	Y	32.8993	35.2242	174.184	114.154	355.261	209.925	529.445	324.079	131	127
18	P	A	29.1459	30.7506	97.0221	64.5908	235.862	145.457	332.884	210.047	97	98
18	P	C	18.5021	22.6891	99.3848	72.4712	437.769	246.939	537.154	319.411	113	114
18	P	D	12.8212	17.3256	73.1906	59.7923	497.666	285.316	570.856	345.109	113	119
18	P	E	15.607	19.416	93.5892	79.8576	506.074	331.441	599.664	411.298	150	139
18	P	F	19.0017	17.7792	93.8875	58.0203	400.214	268.319	494.101	326.339	115	111
18	P	G	14.5597	20.6143	77.1908	59.342	452.977	228.526	530.168	287.868	117	113
18	P	H	15.9998	17.6094	83.9601	61.5731	440.798	288.088	524.758	349.661	127	117
18	P	I	15.6293	17.4223	65.4885	44.7565	353.521	212.136	419.01	256.892	108	111
18	P	K	15.6977	19.1561	80.3839	54.909	431.691	231.731	512.075	286.64	113	114
18	P	L	16.5124	21.0581	97.3906	76.0738	492.413	285.183	589.803	361.257	129	125
18	P	M	16.7836	19.3444	62.0556	40.6393	307.684	169.444	369.74	210.083	89	86
18	P	N	15.7629	19.1506	75.3603	52.2539	402.725	220.604	478.085	272.858	117	105
18	P	Q	17.1683	23.4162	56.1605	45.1425	270.957	147.641	327.117	192.783	92	86
18	P	R	19.5059	19.7336	105.97	70.2752	437.302	285.844	543.272	356.119	146	140
18	P	S	23.4606	27.9746	102.683	72.6292	335.001	186.996	437.684	259.625	111	103
18	P	T	29.6585	32.9152	97.8555	67.5295	232.085	137.632	329.941	205.162	104	99
18	P	V	19.5257	22.6884	94.3612	66.471	388.906	226.502	483.267	292.973	123	123
18	P	W	15.0454	16.0716	92.981	64.2779	525.022	335.669	618.003	399.947	146	137
18	P	Y	14.6929	18.8078	76.5475	58.1197	444.435	250.9	520.982	309.02	109	104
19	K	A	86.5493	89.612	355.841	244.058	55.3014	28.2919	411.143	272.35	105	105
19	K	C	68.3041	74.892	268.457	196.688	124.575	65.9409	393.032	262.629	120	127
19	K	D	79.1535	83.2066	248.398	178.351	65.4199	35.996	313.818	214.346	106	104
19	K	E	79.8215	89.9286	234.572	164.508	59.2987	18.4238	293.871	182.932	90	94
19	K	F	71.6465	79.3777	282.335	222.63	111.731	57.8394	394.066	280.47	125	120
19	K	G	81.7462	81.5794	259.322	173.657	57.9062	39.2119	317.228	212.869	112	108
19	K	H	76.1686	76.3756	332.849	237.959	104.141	73.6049	436.99	311.564	135	131
19	K	I	74.3734	81.2768	407.607	293.163	140.447	67.5338	548.054	360.697	144	133
19	K	L	82.1903	87.9503	223.958	168.721	48.529	23.1157	272.487	191.837	106	100
19	K	M	83.2723	85.5766	253.003	193.123	50.8232	32.5497	303.826	225.673	98	90
19	K	N	75.6499	79.5051	266.925	196.729	85.9175	50.713	352.842	247.442	127	124
19	K	P	84.2801	84.2018	279.411	202.799	52.1155	38.0498	331.526	240.849	118	118
19	K	Q	81.1482	84.7039	466.303	308.4	108.329	55.6921	574.631	364.093	187	184
19	K	R	84.7163	87.9665	279.469	198.664	50.4191	27.1765	329.888	225.841	118	104
19	K	S	81.1499	86.709	221.081	152.025	51.3541	23.3027	272.435	175.327	88	87
19	K	T	83.2172	83.3109	280.917	204.545	56.6539	40.9751	337.571	245.52	104	101
19	K	V	78.194	83.3439	273.627	193.167	76.3065	38.6041	349.933	231.771	109	105
19	K	W	65.5889	74.0521	167.721	119.626	87.9946	41.9168	255.716	161.542	110	99
19	K	Y	71.2497	74.3944	310.05	220.081	125.109	75.7489	435.159	295.829	116	110
20	T	A	54.5325	57.7743	210.071	146.121	175.151	106.796	385.222	252.917	119	124
20	T	C	46.2328	49.5968	180.944	116.766	210.432	118.664	391.377	235.43	111	111
20	T	D	63.0524	71.6332	235.467	163.616	137.98	64.7921	373.447	228.408	116	112
20	T	E	64.3901	68.6237	217.782	161.253	120.441	73.7285	338.223	234.982	104	100
20	T	F	54.816	58.9118	157.054	121.474	129.457	84.722	286.511	206.196	93	92
20	T	G	44.146	52.1691	105.467	77.3779	133.438	70.9434	238.905	148.321	87	82
20	T	H	44.4342	48.4354	187.231	129.983	234.136	138.38	421.367	268.363	121	118
20	T	I	62.8772	64.5814	205.203	151.033	121.152	82.8318	326.355	233.865	109	105
20	T	K	47.4589	49.0511	117.804	77.258	130.419	80.2471	248.223	157.505	95	95
20	T	L	46.7418	51.9623	137.176	101.519	156.3	93.852	293.476	195.371	104	100
20	T	M	50.6021	52.8724	139.972	101.505	136.64	90.4759	276.612	191.981	106	104
20	T	N	56.8179	60.2882	182.702	130.085	138.855	85.6871	321.556	215.772	112	106
20	T	P	26.4187	32.6481	84.9251	59.3537	236.534	122.444	321.459	181.798	121	118
20	T	Q	60.2016	63.9494	211.051	151.294	139.522	85.2897	350.573	236.583	125	119
20	T	R	46.7075	50.2124	151.75	111.701	173.144	110.756	324.894	222.458	98	99
20	T	S	79.7684	81.2246	225.23	161.271	57.1247	37.2783	282.355	198.549	101	90
20	T	V	54.7036	65.4562	167.628	111.573	138.801	58.8813	306.429	170.454	88	89
20	T	W	41.2799	45.3493	156.61	109.186	222.775	131.581	379.385	240.768	123	127
20	T	Y	58.0212	61.7697	126.275	90.2908	91.3608	55.8824	217.636	146.173	104	108
21	A	C	63.4276	77.4698	208.834	153.937	120.414	44.7687	329.248	198.706	104	100
21	A	D	80.944	79.1985	233.669	169.166	55.0108	44.4315	288.68	213.597	94	85
21	A	E	75.9949	79.5678	215.922	152.349	68.205	39.1217	284.127	191.471	99	89
21	A	F	58.4125	73.4623	128.895	102.28	91.7682	36.9477	220.663	139.227	94	88
21	A	G	77.0727	77.9725	160.946	117.453	47.8778	33.1808	208.824	150.634	88	85
21	A	H	61.3315	62.9808	308.763	222.882	194.67	131.007	503.433	353.889	144	145
21	A	I	69.0065	75.3717	267.118	190.582	119.973	62.2742	387.091	252.856	117	118
21	A	K	72.7947	79.6146	264.743	191.354	98.9414	48.9965	363.685	240.351	123	118
21	A	L	74.8334	79.3743	297.441	207.086	100.03	53.812	397.471	260.898	137	136
21	A	M	83.4125	78.6218	202.992	139.124	40.3673	37.8293	243.359	176.953	100	91
21	A	N	76.0193	76.0573	251.082	175.248	79.2052	55.1678	330.287	230.416	107	103
21	A	P	85.9863	84.4212	396.615	281.654	64.6385	51.9753	461.254	333.629	131	124
21	A	Q	79.9336	84.8895	278.077	209.408	69.808	37.275	347.885	246.683	118	118
21	A	R	79.7195	78.2857	233.186	168.265	59.3221	46.6722	292.509	214.937	105	108
21	A	S	79.3837	84.2908	213.712	156.142	55.5017	29.1	269.214	185.242	78	78
21	A	T	74.4484	78.9963	223.8	161.797	76.8108	43.0189	300.611	204.816	106	107
21	A	V	70.3685	74.5461	260.398	181.237	109.651	61.8834	370.049	243.12	111	106
21	A	W	58.4691	62.1956	166.704	127.55	118.41	77.5288	285.114	205.079	108	103
21	A	Y	58.0797	63.5266	143.568	102.66	103.623	58.9414	247.191	161.601	86	87
22	C	A	16.4294	17.223	88.9574	61.9854	452.496	297.913	541.454	359.898	90	92
22	C	D	13.0232	15.9791	51.3942	38.2825	343.243	201.296	394.637	239.578	74	73
22	C	E	15.1404	17.4631	86.3432	60.5409	483.94	286.138	570.284	346.679	115	111
22	C	F	13.7299	17.2372	64.7399	52.0112	406.786	249.728	471.526	301.739	102	107
22	C	G	14.2386	17.1758	63.3539	52.0639	381.59	251.06	444.943	303.124	106	102
22	C	H	20.3521	23.911	82.8519	60.6169	324.241	192.894	407.093	253.51	112	112
22	C	I	13.2614	18.3776	74.448	63.1258	486.939	280.367	561.387	343.493	123	124
22	C	K	13.5384	16.8063	87.0392	61.3011	555.866	303.45	642.905	364.751	134	137
22	C	L	14.2159	15.7105	69.436	46.0899	419.001	247.28	488.437	293.37	109	98
22	C	M	14.9974	16.6507	93.4664	67.1728	529.751	336.25	623.218	403.422	111	112
22	C	N	14.7161	16.5092	74.2725	55.3769	430.429	280.053	504.702	335.43	116	105
22	C	P	13.8592	16.8171	63.2018	51.289	392.827	253.692	456.029	304.981	100	106
22	C	Q	13.0066	16.6896	44.0723	39.5925	294.774	197.636	338.846	237.228	99	97
22	C	R	14.7235	16.8642	83.9075	62.8714	485.981	309.938	569.888	372.81	114	114
22	C	S	13.4696	17.9157	73.4771	62.1871	472.025	284.922	545.502	347.109	113	110
22	C	T	15.6455	17.6965	76.9159	54.6809	414.7	254.313	491.616	308.994	122	117
22	C	V	14.0075	17.0635	90.4896	62.6053	555.518	304.291	646.008	366.896	130	116
22	C	W	12.6595	17.637	63.5819	54.95	438.664	256.61	502.246	311.56	128	120
22	C	Y	12.6877	16.641	69.8015	54.6692	480.351	273.852	550.152	328.521	113	110
23	T	A	49.2186	49.5186	121.725	91.1973	125.59	92.9704	247.315	184.168	92	90
23	T	C	62.3531	61.0769	217.651	162.99	131.411	103.87	349.061	266.861	114	112
23	T	D	35.749	43.134	112.883	77.5036	202.882	102.177	315.764	179.681	112	106
23	T	E	36.9129	44.5177	133.392	93.5951	227.978	116.647	361.37	210.242	114	113
23	T	F	19.7074	23.4293	98.1099	75.0913	399.723	245.41	497.833	320.501	114	112
23	T	G	70.8229	76.5067	240.432	180.482	99.0516	55.4216	339.484	235.904	112	109
23	T	H	30.0499	31.7472	113.198	76.5211	263.503	164.512	376.701	241.033	107	103
23	T	I	37.181	45.1307	135.919	99.4433	229.641	120.902	365.56	220.345	119	116
23	T	K	60.4898	62.7657	178.903	130.155	116.854	77.2115	295.757	207.367	90	87
23	T	L	41.3112	45.3606	127.1	89.3141	180.564	107.584	307.664	196.898	94	96
23	T	M	35.9465	42.7258	94.5045	66.5821	168.399	89.2536	262.903	155.836	82	93
23	T	N	82.1529	77.3466	214.624	143.393	46.6255	41.997	261.25	185.39	82	89
23	T	P	51.8986	62.9265	171.78	129.813	159.212	76.4802	330.992	206.293	111	109
23	T	Q	45.9205	50.7645	115.818	97.8409	136.397	94.894	252.215	192.735	112	105
23	T	R	51.4178	55.8535	151.469	103.268	143.116	81.623	294.585	184.891	105	107
23	T	S	85.8676	87.3479	291.33	204.729	47.9479	29.6544	339.277	234.383	107	111
23	T	V	35.6662	44.4639	164.879	128.989	297.405	161.109	462.284	290.097	125	124
23	T	W	18.5356	24.3116	99.0631	79.6061	435.385	247.834	534.448	327.44	130	124
23	T	Y	23.0231	28.4925	89.6884	61.7222	299.87	154.904	389.558	216.626	102	105
24	N	A	81.6261	84.7512	258.287	188.945	58.1399	33.9957	316.427	222.94	101	99
24	N	C	54.0015	55.887	197.395	143.609	168.142	113.354	365.537	256.964	114	112
24	N	D	28.6162	34.0043	113.97	88.0217	284.301	170.833	398.271	258.855	112	106
24	N	E	40.5771	43.7676	149.56	105.9	219.022	136.059	368.581	241.959	124	123
24	N	F	37.0236	40.9976	167.505	119.269	284.922	171.648	452.427	290.917	124	125
24	N	G	68.9748	72.2066	215.496	154.013	96.931	59.282	312.427	213.295	95	95
24	N	H	64.5341	72.5394	283.943	208.062	156.046	78.7644	439.989	286.827	130	113
24	N	I	38.4865	42.2121	162.306	116.584	259.416	159.603	421.721	276.187	99	99
24	N	K	82.6146	82.9592	285.259	193.43	60.03	39.7328	345.289	233.163	106	102
24	N	L	31.6053	33.8499	107.537	80.8284	232.713	157.956	340.25	238.785	109	109
24	N	M	52.0557	58.7911	175.736	137.068	161.857	96.0761	337.593	233.144	118	111
24	N	P	79.1128	83.5464	214.267	157.697	56.5704	31.0569	270.838	188.754	97	91
24	N	Q	65.53	69.9841	224.186	174.745	117.926	74.9474	342.112	249.692	123	122
24	N	R	85.7193	85.8778	293.698	214.934	48.9297	35.3448	342.628	250.279	131	126
24	N	S	83.4821	86.573	299.242	223.563	59.2085	34.6736	358.451	258.237	93	91
24	N	T	83.5004	83.6856	333.305	243.125	65.8607	47.3969	399.166	290.522	128	127
24	N	V	62.0242	60.4063	257.34	174.061	157.562	114.089	414.902	288.15	133	131
24	N	W	21.2472	26.1848	111.929	87.2614	414.867	245.991	526.796	333.252	117	120
24	N	Y	39.0387	34.2066	103.259	63.5819	161.246	122.294	264.505	185.876	97	88
25	C	A	13.0214	17.5121	85.5742	69.1962	571.608	325.937	657.182	395.134	131	120
25	C	D	15.526	16.98	68.7576	46.0811	374.096	225.303	442.853	271.384	94	90
25	C	E	14.3749	16.6882	67.8278	51.0901	404.021	255.054	471.848	306.144	127	117
25	C	F	16.0745	17.4082	65.8628	45.353	343.87	215.174	409.733	260.527	110	102
25	C	G	13.6455	17.1161	83.6531	60.7046	529.39	293.959	613.044	354.663	132	125
25	C	H	14.1499	16.169	59.5818	42.0546	361.493	218.04	421.074	260.094	85	82
25	C	I	15.1351	14.8164	63.7837	43.5635	357.646	250.459	421.429	294.023	97	89
25	C	K	13.4539	18.2323	65.2838	57.9092	419.957	259.709	485.24	317.619	99	99
25	C	L	13.9584	17.7013	83.3197	64.2136	513.595	298.547	596.915	362.761	93	99
25	C	M	14.326	16.3721	61.3421	40.1247	366.846	204.956	428.188	245.08	100	104
25	C	N	13.0371	16.5289	67.7137	55.3272	451.678	279.402	519.392	334.729	109	112
25	C	P	15.1761	18.5324	92.9956	66.4944	519.783	292.306	612.778	358.8	119	119
25	C	Q	15.8475	18.5048	77.53	51.1018	411.695	225.053	489.225	276.154	121	124
25	C	R	15.3223	17.4021	86.8462	63.8451	479.95	303.036	566.796	366.881	133	127
25	C	S	13.2076	15.6104	54.7219	39.3878	359.599	212.93	414.321	252.318	115	110
25	C	T	13.7313	17.5302	81.9074	57.6343	514.593	271.137	596.501	328.771	109	108
25	C	V	13.4936	16.7375	79.7815	61.652	511.471	306.696	591.252	368.348	124	125
25	C	W	12.534	18.1779	59.9326	50.5638	418.227	227.597	478.159	278.161	116	115
25	C	Y	15.2741	15.7977	80.7933	53.7043	448.162	286.245	528.955	339.949	138	132
26	Y	A	18.3579	23.4437	81.5243	67.4652	362.558	220.311	444.082	287.776	117	129
26	Y	C	27.2965	31.9664	145.34	106.619	387.11	226.916	532.45	333.535	127	126
26	Y	D	14.6883	18.6101	100.356	74.293	582.879	324.916	683.234	399.209	150	148
26	Y	E	14.7216	18.4871	76.2404	60.9941	441.64	268.933	517.88	329.927	150	143
26	Y	F	81.4956	85.7976	333.121	239.967	75.6387	39.7228	408.76	279.69	133	133
26	Y	G	15.9756	17.9538	75.5123	47.0081	397.161	214.82	472.674	261.829	125	116
26	Y	H	52.5978	59.9823	177.429	131.094	159.903	87.4603	337.333	218.554	93	94
26	Y	I	16.3088	19.1735	91.9166	65.2136	471.685	274.911	563.601	340.124	123	120
26	Y	K	19.4079	23.0086	104.058	84.6092	432.102	283.119	536.16	367.728	125	122
26	Y	L	29.5653	32.7651	145.393	102.666	346.375	210.673	491.768	313.339	133	131
26	Y	M	49.1681	54.7587	195.12	141.679	201.723	117.055	396.843	258.734	127	134
26	Y	N	17.3475	20.7134	85.7146	57.4413	408.389	219.873	494.103	277.314	110	113
26	Y	P	25.1713	26.3014	113.28	74.8866	336.757	209.838	450.038	284.725	135	136
26	Y	Q	27.7969	32.1808	138.173	99.1977	358.908	209.053	497.081	308.251	139	146
26	Y	R	25.7835	29.122	111.134	80.9921	319.893	197.121	431.027	278.113	129	122
26	Y	S	16.6023	20.0994	58.763	46.1308	295.181	183.383	353.944	229.514	99	95
26	Y	T	17.4399	18.3079	54.8564	37.224	259.689	166.098	314.546	203.322	97	87
26	Y	V	22.2746	25.015	106.251	79.6763	370.753	238.838	477.004	318.514	148	145
26	Y	W	84.776	90.2411	344.604	241.327	61.8834	26.0978	406.487	267.425	129	124
27	C	A	14.221	18.2713	71.9858	55.757	434.209	249.404	506.195	305.161	114	104
27	C	D	15.2086	18.5373	63.3422	49.9322	353.147	219.429	416.49	269.361	115	108
27	C	E	13.8196	18.1424	61.1608	51.3358	381.406	231.625	442.567	282.96	119	115
27	C	F	12.8796	14.3789	52.1428	39.0983	352.707	232.817	404.849	271.915	98	103
27	C	G	13.5002	16.3118	54.5991	42.3266	349.831	217.158	404.43	259.485	103	103
27	C	H	15.7489	18.6077	67.6523	47.2244	361.917	206.565	429.569	253.79	94	96
27	C	I	14.0118	17.6735	77.1791	54.3768	473.635	253.298	550.814	307.675	117	118
27	C	K	13.5424	15.8716	58.1489	43.4523	371.234	230.322	429.383	273.775	91	89
27	C	L	14.012	19.4442	88.7352	75.2492	544.545	311.751	633.28	387.001	121	118
27	C	M	14.0449	14.5529	61.3772	36.7269	375.629	215.642	437.006	252.369	107	98
27	C	N	13.3231	17.1582	64.3598	47.0198	418.708	227.016	483.067	274.036	95	95
27	C	P	14.974	18.3219	70.3893	52.5405	399.686	234.223	470.075	286.763	108	104
27	C	Q	12.9541	18.1389	55.4295	44.0839	372.463	198.951	427.892	243.035	110	104
27	C	R	14.8073	17.0392	78.337	56.4149	450.706	274.674	529.043	331.088	123	119
27	C	S	15.4434	16.3351	61.0204	41.1511	334.102	210.766	395.123	251.917	86	83
27	C	T	13.4309	17.0886	65.8335	50.9439	424.331	247.173	490.165	298.117	101	88
27	C	V	11.6719	17.802	54.9441	51.3358	415.796	237.035	470.74	288.37	125	122
27	C	W	12.7901	15.5769	71.3016	47.8794	486.171	259.496	557.473	307.375	121	117
27	C	Y	13.477	17.8675	88.5042	66.2136	568.202	304.368	656.706	370.582	113	109
28	K	A	30.5444	36.6735	140.024	100.174	318.404	172.977	458.428	273.151	113	110
28	K	C	34.3712	36.7995	120.772	89.4604	230.603	153.642	351.375	243.102	101	99
28	K	D	13.2357	16.6331	74.4684	58.108	488.165	291.244	562.633	349.352	111	101
28	K	E	13.8922	17.736	66.0733	51.4586	409.541	238.678	475.614	290.136	111	114
28	K	F	17.1821	24.5609	71.0677	61.383	342.548	188.539	413.616	249.922	90	93
28	K	G	19.3524	22.4834	76.3311	47.9262	318.096	165.236	394.428	213.162	93	91
28	K	H	36.7867	35.7192	125.366	78.1265	215.425	140.598	340.79	218.724	90	94
28	K	I	28.698	28.9199	169.254	118.663	420.521	291.655	589.774	410.318	121	120
28	K	L	20.085	23.4059	103.631	65.7048	412.329	215.014	515.96	280.719	120	112
28	K	M	19.8268	22.9138	67.5032	48.6865	272.96	163.79	340.464	212.477	100	94
28	K	N	16.8387	21.9155	98.952	75.986	488.696	270.736	587.648	346.722	110	101
28	K	P	32.2064	33.6844	119.292	82.2202	251.107	161.87	370.399	244.09	98	88
28	K	Q	19.6256	25.798	82.0302	63.8977	335.946	183.787	417.976	247.685	109	108
28	K	R	62.7584	64.41	191.348	129.129	113.548	71.3508	304.896	200.48	102	95
28	K	S	24.1071	32.5495	103.329	66.0207	325.296	136.811	428.626	202.831	90	78
28	K	T	20.9238	21.9255	68.4594	52.1779	258.724	185.801	327.184	237.979	87	80
28	K	V	51.8295	49.1525	165.06	115.503	153.408	119.486	318.468	234.988	105	103
28	K	W	20.4449	25.6803	105.321	80.6997	409.825	233.548	515.145	314.248	122	112
28	K	Y	28.1123	33.0922	72.1262	46.9934	184.438	95.0142	256.564	142.008	70	63
29	K	A	91.4751	85.7409	279.575	186.868	26.0544	31.077	305.629	217.945	73	74
29	K	C	85.9363	84.397	295.189	209.027	48.3086	38.6442	343.498	247.672	85	80
29	K	D	26.1501	34.3584	77.8282	57.415	219.793	109.691	297.621	167.106	77	77
29	K	E	78.8027	77.6767	196.202	144.112	52.7767	41.4159	248.979	185.528	99	101
29	K	F	84.9488	90.0512	352.116	240.789	62.3877	26.6021	414.504	267.391	93	91
29	K	G	82.5651	82.3467	322.963	236.871	68.1984	50.7798	391.161	287.651	109	110
29	K	H	67.8277	75.9314	215.966	150.349	102.438	47.6574	318.404	198.007	74	71
29	K	I	76.5524	82.9504	235.827	171.473	72.2324	35.2446	308.059	206.718	91	86
29	K	L	67.042	72.953	249.643	172.105	122.725	63.807	372.368	235.912	100	98
29	K	M	77.9547	80.4903	204.904	152.516	57.9462	36.9678	262.851	189.484	82	84
29	K	N	54.8936	69.1764	204.975	135.533	168.429	60.3907	373.403	195.923	99	95
29	K	P	24.1491	28.9634	74.2199	50.1661	233.121	123.039	307.341	173.205	64	64
29	K	Q	75.5025	79.4928	152.656	115.339	49.5308	29.7545	202.187	145.093	71	69
29	K	R	83.4468	84.9246	273.478	193.07	54.2494	34.2728	327.727	227.343	77	76
29	K	S	81.9774	84.816	253.731	181.035	55.7823	32.4094	309.514	213.444	81	76
29	K	T	61.2293	66.9801	161.429	116.628	102.217	57.4954	263.646	174.124	67	65
29	K	V	87.5115	86.2602	261.995	181.772	37.3885	28.9531	299.383	210.725	91	89
29	K	W	72.9975	75.6795	248.38	184.991	91.8784	59.449	340.259	244.44	99	96
29	K	Y	81.1183	80.6497	240.81	176.166	56.0528	42.2675	296.862	218.434	84	83
30	C	A	14.2011	17.2136	82.2612	55.9091	496.998	268.886	579.259	324.795	110	100
30	C	D	14.391	18.6429	63.4884	46.7741	377.679	204.121	441.167	250.895	97	98
30	C	E	12.7986	17.5319	56.722	41.0838	386.468	193.254	443.19	234.338	109	110
30	C	F	14.9675	16.4393	69.9945	48.669	397.649	247.383	467.643	296.052	102	104
30	C	G	13.6161	17.0358	64.9855	49.555	412.286	241.332	477.271	290.887	121	120
30	C	H	16.5625	19.195	82.1793	59.418	413.999	250.132	496.178	309.55	90	93
30	C	I	14.8953	17.2236	72.0326	51.2539	411.561	246.325	483.594	297.579	95	91
30	C	K	12.7086	17.428	50.2831	38.6802	345.38	183.263	395.663	221.943	93	88
30	C	L	14.7224	19.1229	66.2604	55.7863	383.804	235.939	450.064	291.725	94	90
30	C	M	14.361	17.4403	68.6874	54.3827	409.604	257.439	478.292	311.821	107	105
30	C	N	14.942	18.1908	63.1609	46.8385	359.546	210.646	422.707	257.485	85	79
30	C	P	11.7439	13.7014	38.8264	25.6445	291.782	161.523	330.608	187.167	69	68
30	C	Q	15.6626	15.2348	40.189	27.9428	216.403	155.472	256.592	183.415	78	80
30	C	R	12.9227	18.8112	61.4854	46.7566	414.31	201.8	475.795	248.557	97	96
30	C	S	13.9542	17.8872	60.1432	51.3796	370.86	235.862	431.003	287.242	94	91
30	C	T	14.9626	17.609	74.5532	56.5641	423.71	264.658	498.263	321.223	83	86
30	C	V	13.5196	16.7856	74.4596	58.8917	476.293	291.955	550.753	350.847	109	113
30	C	W	14.8934	17.4298	52.5288	43.002	300.17	203.713	352.699	246.715	113	104
30	C	Y	12.7496	16.1904	62.1696	46.6864	425.45	241.673	487.62	288.359	102	99
31	C	A	79.7068	83.0984	288.04	211.063	73.3344	42.9287	361.374	253.991	103	105
31	C	D	15.3763	16.9796	74.5561	54.6342	410.322	267.13	484.878	321.764	122	119
31	C	E	15.3374	16.6923	60.997	44.5167	336.704	222.174	397.701	266.691	95	95
31	C	F	13.9491	18.3782	60.6695	52.0902	374.266	231.344	434.936	283.434	99	106
31	C	G	22.9918	26.5104	80.9336	54.1955	271.077	150.235	352.011	204.431	105	112
31	C	H	12.0108	17.6364	64.6259	51.4059	473.438	240.07	538.064	291.476	97	85
31	C	I	19.8962	24.2875	79.7669	56.2921	321.149	175.482	400.916	231.774	102	100
31	C	K	14.5231	15.958	57.2308	42.2944	336.837	222.742	394.068	265.036	94	96
31	C	L	15.7469	20.1614	73.8397	55.9851	395.078	221.7	468.917	277.685	116	118
31	C	M	22.739	27.271	89.1562	61.5877	302.929	164.248	392.085	225.835	94	90
31	C	N	16.8875	18.7973	55.9939	39.6685	275.575	171.364	331.569	211.033	89	79
31	C	P	13.4956	15.546	76.6264	57.4764	491.16	312.242	567.787	369.719	119	112
31	C	Q	14.6648	16.8016	40.1247	29.8201	233.488	147.664	273.613	177.484	83	82
31	C	R	15.0064	18.6218	95.0659	67.0032	538.437	292.807	633.503	359.81	116	116
31	C	S	71.9055	75.5631	195.027	144.112	76.1997	46.6054	271.226	190.717	104	101
31	C	T	26.183	35.7501	108.198	86.6883	305.039	155.796	413.237	242.484	102	96
31	C	V	33.4024	37.3317	151.188	108.912	301.439	182.828	452.628	291.74	117	113
31	C	W	15.0598	17.582	63.81	44.9495	359.9	210.706	423.71	255.656	102	99
31	C	Y	13.361	15.5587	60.9151	40.4405	395.004	219.482	455.919	259.923	94	102
32	F	A	14.1166	16.5183	39.2358	29.1651	238.704	147.397	277.94	176.562	97	94
32	F	C	18.9353	19.4621	71.5209	39.844	306.191	164.882	377.712	204.726	92	91
32	F	D	12.9946	14.6485	50.207	36.2473	336.163	211.201	386.37	247.448	110	109
32	F	E	15.1605	16.6125	54.0142	37.6567	302.267	189.02	356.282	226.677	105	103
32	F	G	16.0173	18.0882	70.1144	47.9496	367.627	217.138	437.742	265.088	109	111
32	F	H	18.3283	19.7657	52.2481	36.2239	232.82	147.043	285.068	183.267	82	83
32	F	I	15.5615	21.1629	52.0551	42.6336	282.458	158.821	334.513	201.455	97	94
32	F	K	14.9057	15.9609	49.8795	36.3	284.755	191.13	334.635	227.43	97	102
32	F	L	52.5245	50.7759	126.067	87.0655	113.949	84.4047	240.016	171.47	100	101
32	F	M	42.8668	38.4711	98.1011	60.1344	130.75	96.1763	228.851	156.311	93	89
32	F	N	13.2414	16.9208	52.1779	35.9023	341.873	176.276	394.051	212.179	92	94
32	F	P	14.51	17.0911	38.7679	30.674	228.412	148.799	267.18	179.473	81	79
32	F	Q	13.1716	18.7868	46.2361	41.1715	304.792	177.98	351.028	219.151	90	87
32	F	R	14.3982	16.6448	67.8921	50.5638	403.64	253.218	471.532	303.781	103	94
32	F	S	15.1611	16.2695	43.7915	29.8435	245.049	153.588	288.841	183.432	91	95
32	F	T	16.7185	15.9476	65.816	38.4346	327.854	202.571	393.67	241.006	95	85
32	F	V	20.6537	24.4021	86.4865	60.7309	332.259	188.145	418.746	248.876	110	105
32	F	W	78.1798	75.2789	156.753	107.874	43.7502	35.4249	200.503	143.298	79	70
32	F	Y	81.4592	89.8266	308.33	210.177	70.1786	23.8036	378.509	233.98	92	85
33	H	A	15.0585	15.1455	56.4588	36.3233	318.47	203.506	374.929	239.83	100	96
33	H	C	14.7725	18.7895	52.172	44.0313	300.998	190.309	353.17	234.34	91	92
33	H	D	12.6079	18.1614	58.3536	48.6602	404.481	219.272	462.835	267.932	124	121
33	H	E	13.8933	18.0813	74.6614	63.1784	462.728	286.235	537.39	349.413	135	137
33	H	F	14.7515	18.5501	90.4429	71.6642	522.665	314.663	613.108	386.328	126	124
33	H	G	14.7568	15.1323	62.231	36.7327	359.479	206.011	421.71	242.744	109	103
33	H	I	12.7009	15.5909	49.7041	41.8265	341.64	226.448	391.344	268.275	99	94
33	H	K	12.6863	17.419	50.5726	39.9668	348.068	189.477	398.641	229.444	129	119
33	H	L	13.7883	16.9718	80.8021	59.8362	505.216	292.727	586.018	352.563	159	151
33	H	M	13.751	16.3611	73.2432	55.3067	459.395	282.732	532.639	338.038	132	132
33	H	N	12.9942	18.1454	74.3105	64.889	497.562	292.717	571.873	357.606	116	110
33	H	P	14.5442	18.3809	66.1522	49.9673	388.683	221.877	454.835	271.844	101	92
33	H	Q	16.2536	17.6712	73.7579	48.1251	380.037	224.211	453.795	272.336	128	122
33	H	R	14.6081	16.9962	76.6878	56.0114	448.282	273.541	524.97	329.553	134	126
33	H	S	13.6407	15.1236	47.8093	35.7093	302.682	200.407	350.491	236.117	87	92
33	H	T	15.2643	16.6114	55.6225	37.9784	308.773	190.649	364.395	228.628	98	93
33	H	V	13.3226	14.9682	59.4999	41.8733	387.11	237.876	446.61	279.749	117	113
33	H	W	14.9491	16.4251	46.1893	34.0308	262.788	173.157	308.978	207.188	112	107
33	H	Y	16.1645	16.2953	55.4675	39.0282	287.677	200.478	343.145	239.506	98	94
34	C	A	16.7295	18.7623	53.0639	39.8089	264.124	172.366	317.188	212.175	91	93
34	C	D	13.463	16.2834	64.7662	46.9759	416.303	241.513	481.069	288.489	104	104
34	C	E	14.2698	14.8421	53.5464	37.5515	321.696	215.455	375.243	253.006	82	80
34	C	F	14.4048	19.3724	63.8451	49.7743	379.375	207.16	443.221	256.934	102	93
34	C	G	14.3849	15.2916	53.5113	39.5633	318.484	219.162	371.995	258.725	114	119
34	C	H	15.2003	15.0354	71.4507	47.3707	398.611	267.691	470.061	315.061	95	96
34	C	I	14.3275	18.4371	64.3715	51.6516	384.916	228.499	449.287	280.15	91	88
34	C	K	16.2145	14.9005	56.026	33.8963	289.504	193.588	345.53	227.485	94	87
34	C	L	14.0355	17.0729	73.0853	59.1724	447.634	287.414	520.719	346.586	100	99
34	C	M	14.9206	17.928	82.2436	61.9269	468.966	283.493	551.21	345.42	111	112
34	C	N	14.1296	16.5731	54.1955	41.2388	329.364	207.591	383.559	248.829	88	88
34	C	P	14.338	18.6397	81.3459	55.6956	486.001	243.106	567.347	298.801	114	118
34	C	Q	15.9458	14.1549	68.0734	44.4816	358.831	269.768	426.905	314.249	96	104
34	C	R	14.9357	16.9573	78.9686	54.6605	449.754	267.681	528.723	322.341	126	123
34	C	S	14.7396	18.4045	73.407	57.5641	424.618	255.208	498.025	312.772	111	116
34	C	T	16.5155	18.1893	74.2403	53.6429	375.278	241.272	449.518	294.915	99	102
34	C	V	14.6727	19.6368	71.8104	62.0731	417.606	254.032	489.416	316.105	118	120
34	C	W	14.2459	14.9359	84.1268	55.1254	506.408	313.956	590.535	369.081	121	120
34	C	Y	13.2034	17.7719	71.67	59.0379	471.144	273.161	542.814	332.199	125	109
35	Q	A	28.0717	32.3042	72.4011	49.1778	185.513	103.056	257.914	152.233	80	78
35	Q	C	36.97	46.8662	121.497	86.8462	207.14	98.4605	328.637	185.307	83	81
35	Q	D	13.3283	17.5617	50.5813	43.2389	328.923	202.972	379.504	246.211	96	96
35	Q	E	38.7113	43.3368	133.682	95.0571	211.648	124.288	345.33	219.345	91	90
35	Q	F	23.6518	25.1411	78.7522	54.7628	254.213	163.059	332.965	217.822	101	103
35	Q	G	18.3778	22.087	41.4522	33.8437	184.104	119.386	225.556	153.229	79	70
35	Q	H	75.1791	80.1746	200.939	137.831	66.3416	34.0825	267.281	171.914	99	96
35	Q	I	46.1763	48.36	122.672	77.8458	142.989	83.1257	265.661	160.971	79	80
35	Q	K	16.3532	16.4038	65.9329	43.9845	337.248	224.151	403.181	268.135	93	88
35	Q	L	33.6893	31.2665	84.7408	60.6257	166.796	133.274	251.537	193.9	94	87
35	Q	M	67.7591	74.4024	214.987	158.721	102.294	54.6068	317.281	213.328	114	109
35	Q	N	32.6716	41.0019	54.3271	41.8792	111.955	60.2605	166.282	102.14	69	62
35	Q	P	49.3469	50.548	140.173	102.496	143.884	100.274	284.057	202.77	98	90
35	Q	R	14.893	16.2445	71.4595	53.2306	408.359	274.453	479.818	327.684	107	106
35	Q	S	36.0168	40.3549	60.7105	40.2358	107.851	59.469	168.562	99.7048	89	85
35	Q	T	58.3237	62.0866	156.399	112.315	111.758	68.5857	268.157	180.901	97	89
35	Q	V	47.9783	55.7909	144.41	103.04	156.58	81.6497	300.991	184.69	89	89
35	Q	W	15.5213	18.3355	87.4544	63.7223	475.993	283.814	563.447	347.536	116	124
35	Q	Y	66.7035	69.4295	173.043	126.12	86.3783	55.5318	259.422	181.652	90	89
36	V	A	57.9181	63.1734	201.615	149.533	146.489	87.1698	348.103	236.703	98	88
36	V	C	67.1	67.1944	171.757	125.953	84.2144	61.4927	255.971	187.446	84	77
36	V	D	15.5956	17.4045	73.9947	46.0636	400.464	218.601	474.459	264.664	89	90
36	V	E	15.2313	21.4316	96.8203	72.6701	538.848	266.408	635.668	339.078	122	127
36	V	F	54.0258	57.5162	189.956	138.603	161.646	102.378	351.603	240.981	99	95
36	V	G	23.592	30.5087	49.9322	38.0018	161.716	86.5587	211.649	124.56	63	57
36	V	H	75.1444	80.6388	154.206	110.046	51.0068	26.4218	205.213	136.468	68	67
36	V	I	46.3808	56.6676	190	145.937	219.653	111.595	409.653	257.531	112	108
36	V	K	68.2395	73.5375	137.761	94.2676	64.1175	33.9222	201.878	128.19	84	81
36	V	L	77.4538	80.2756	222.089	158.2	64.6485	38.8713	286.738	197.072	93	90
36	V	M	59.7012	61.6004	173.561	117.321	117.155	73.1341	290.716	190.455	91	90
36	V	N	40.738	46.7447	116.438	77.4422	169.384	88.2284	285.822	165.671	79	75
36	V	P	14.0423	16.5677	78.2025	53.2247	478.704	268.031	556.907	321.256	86	82
36	V	Q	40.6833	46.5324	105.52	72.5063	153.849	83.3127	259.368	155.819	104	105
36	V	R	58.3048	67.3459	136.17	102.221	97.3785	49.5642	233.549	151.785	70	74
36	V	S	51.3631	58.8297	117.649	86.9339	111.404	60.8382	229.053	147.772	81	77
36	V	T	54.8772	59.1765	212.279	159.92	174.547	110.322	386.826	270.242	96	90
36	V	W	59.4285	66.0362	131.486	91.1739	89.7646	46.8926	221.25	138.067	104	100
36	V	Y	47.8052	60.1759	194.044	151.2	211.862	100.063	405.906	251.264	92	89
37	C	A	13.1954	17.4559	35.1712	25.3345	231.371	119.8	266.542	145.134	75	71
37	C	D	15.1699	17.8299	47.5169	35.0426	265.714	161.496	313.231	196.539	105	101
37	C	E	12.5581	15.8728	31.9606	26.4808	222.541	140.351	254.502	166.831	98	96
37	C	F	14.6374	16.8607	64.4153	43.1336	375.659	212.69	440.074	255.824	99	92
37	C	G	14.1557	17.3999	39.4405	30.4488	239.178	144.545	278.619	174.994	76	70
37	C	H	14.807	18.3014	66.664	50.5521	383.556	225.667	450.22	276.219	77	84
37	C	I	13.737	17.8137	49.5111	37.1421	310.91	171.361	360.421	208.503	93	92
37	C	K	14.1629	20.9768	34.2414	29.2178	207.527	110.068	241.768	139.286	77	76
37	C	L	14.1212	15.7133	79.9628	47.4467	486.298	254.507	566.261	301.953	102	101
37	C	M	17.4971	15.7118	48.6339	30.0365	229.32	161.135	277.954	191.172	89	88
37	C	N	13.7459	18.3121	40.2826	31.8144	252.77	141.92	293.053	173.735	93	94
37	C	P	14.5173	19.0085	65.313	52.2188	384.585	222.495	449.898	274.713	79	81
37	C	Q	14.9747	17.1821	67.6991	42.5634	384.391	205.156	452.09	247.719	95	93
37	C	R	11.7416	16.1289	55.3008	43.7915	415.682	227.717	470.983	271.509	100	99
37	C	S	14.0259	15.407	38.1158	25.317	233.638	139.005	271.754	164.322	73	71
37	C	T	12.0886	17.0749	39.0252	30.7324	283.8	149.254	322.825	179.986	66	62
37	C	V	14.2318	16.8532	55.95	45.3062	337.185	223.523	393.135	268.829	103	102
37	C	W	12.2497	16.6545	35.6683	23.3344	255.508	116.774	291.177	140.108	84	79
37	C	Y	11.1045	14.7663	27.1241	19.0711	217.138	110.082	244.262	129.153	71	66
38	F	A	14.1257	14.4612	29.4224	16.7727	178.868	99.2119	208.29	115.985	73	75
38	F	C	14.5905	15.6612	46.7566	32.7384	273.702	176.303	320.458	209.042	92	87
38	F	D	10.7108	14.1057	34.3788	25.7907	286.595	157.048	320.974	182.839	87	91
38	F	E	13.8682	15.8397	41.616	27.4925	258.467	146.074	300.083	173.567	86	80
38	F	G	14.6198	18.3016	24.7643	18.2728	144.625	81.5695	169.389	99.8423	65	64
38	F	H	16.3976	15.2704	35.7999	22.1326	182.525	122.805	218.325	144.938	75	79
38	F	I	11.8828	17.3607	37.5281	32.6682	278.29	155.505	315.818	188.173	98	92
38	F	K	11.84	16.9019	28.4048	21.4162	211.501	105.293	239.906	126.709	74	74
38	F	L	16.9988	21.5668	54.3271	40.4756	265.266	147.2	319.593	187.675	93	85
38	F	M	15.7915	19.6467	42.4669	36.1771	226.455	147.961	268.922	184.138	104	96
38	F	N	13.9912	15.606	52.0902	34.4227	320.217	186.151	372.307	220.574	101	103
38	F	P	16.1142	19.4008	58.9589	42.5195	306.923	176.644	365.882	219.163	91	87
38	F	Q	13.2667	14.8699	28.7031	22.1063	187.651	126.559	216.354	148.665	89	92
38	F	R	13.0588	15.4056	30.3114	19.8781	201.803	109.153	232.115	129.032	81	76
38	F	S	14.3374	18.1828	46.3881	37.7562	277.158	169.891	323.546	207.648	87	89
38	F	T	13.9218	13.7116	33.1858	20.6238	205.186	129.788	238.372	150.412	90	84
38	F	V	14.5712	21.902	41.6072	34.2121	243.937	121.994	285.544	156.206	82	75
38	F	W	46.7115	47.28	72.6525	53.4674	82.8819	59.6193	155.534	113.087	85	81
38	F	Y	33.7533	38.6621	84.2847	60.7222	165.423	96.3366	249.708	157.059	105	98
39	M	A	64.0981	67.9923	220.35	152.077	123.42	71.5912	343.769	223.669	108	109
39	M	C	72.2627	75.7057	295.926	227.379	113.588	72.9671	409.514	300.346	112	114
39	M	D	30.8096	34.2309	77.6996	53.6166	174.493	103.016	252.193	156.632	91	93
39	M	E	33.3712	41.69	91.4429	71.17	182.575	99.5425	274.018	170.712	106	109
39	M	F	32.3479	32.2362	168.403	118.856	352.196	249.848	520.598	368.704	103	95
39	M	G	39.021	49.3647	110.245	76.0913	172.282	78.0497	282.527	154.141	89	85
39	M	H	16.7659	20.3209	86.7526	73.7637	430.683	289.23	517.435	362.994	95	98
39	M	I	78.3796	81.7035	437.284	311.102	120.621	69.6677	557.905	380.77	114	118
39	M	K	15.4479	15.877	55.3359	35.8613	302.875	190.008	358.211	225.87	96	98
39	M	L	85.8196	88.5707	337.472	252.942	55.7622	32.6398	393.234	285.582	99	96
39	M	N	46.0226	53.7673	159.674	114.891	187.273	98.7911	346.947	213.682	98	92
39	M	P	16.1952	17.7706	114.029	81.5828	590.062	377.505	704.09	459.088	106	104
39	M	Q	29.2337	32.3642	134.919	95.7764	326.599	200.157	461.517	295.933	107	101
39	M	R	14.4837	17.4373	78.2932	58.2396	462.267	275.756	540.561	333.995	128	117
39	M	S	73.2691	71.5221	270.785	196.86	98.7911	78.3837	369.576	275.244	89	82
39	M	T	78.3804	79.6794	327.796	241.827	90.4157	61.6731	418.212	303.5	105	101
39	M	V	76.5375	81.6145	217.852	143.112	66.7824	32.2391	284.635	175.351	108	103
39	M	W	12.3691	16.171	48.2742	37.7474	342.007	195.679	390.281	233.426	108	110
39	M	Y	17.0643	18.8671	95.1214	68.4301	462.307	294.266	557.429	362.696	114	113
40	T	A	64.2211	71.7833	270.293	195.764	150.586	76.9511	420.879	272.715	93	94
40	T	C	65.4977	65.6258	214.338	158.382	112.907	82.9587	327.245	241.34	89	86
40	T	D	37.1638	43.2653	107.373	77.6469	181.546	101.82	288.92	179.467	73	72
40	T	E	63.3491	63.2478	209.63	143.375	121.282	83.3127	330.912	226.688	81	79
40	T	F	39.7809	45.9495	119.14	88.4954	180.351	104.097	299.491	192.593	94	88
40	T	G	62.7944	66.3604	211.595	152.861	125.37	77.4887	336.965	230.35	102	103
40	T	H	69.8478	69.6901	224.402	163.47	96.8709	71.097	321.273	234.567	81	77
40	T	I	60.5181	63.9895	95.5308	66.0821	62.3243	37.1882	157.855	103.27	81	82
40	T	K	91.1743	91.7236	317.418	211.843	30.7263	19.115	348.145	230.958	109	101
40	T	L	59.2025	60.6218	138.615	93.1447	95.5218	60.5042	234.136	153.649	73	69
40	T	M	63.4582	80.057	74.8105	58.0729	43.079	14.4665	117.89	72.5394	70	67
40	T	N	78.143	80.5706	118.663	78.6441	33.1908	18.9648	151.854	97.6088	65	56
40	T	P	15.3151	16.7508	80.2231	57.5378	443.593	285.954	523.816	343.492	71	79
40	T	Q	85.8374	87.9872	432.284	318.073	71.3241	43.4263	503.608	361.5	98	94
40	T	R	85.6641	86.4478	380.141	266.018	63.6166	41.7031	443.757	307.721	93	93
40	T	S	79.6274	81.9727	211.019	156.253	53.989	34.363	265.008	190.616	78	72
40	T	V	74.3242	80.1473	176.032	125.515	60.8115	31.0903	236.843	156.605	93	91
40	T	W	59.0495	66.6811	151.493	118.093	105.059	59.0082	256.552	177.101	76	75
40	T	Y	43.891	46.9782	139.621	103.227	178.487	116.507	318.108	219.734	93	90
41	K	A	13.9803	17.0869	152.013	109.502	935.321	531.354	1087.33	640.856	156	149
41	K	C	13.8075	17.4762	80.6763	64.7457	503.617	305.734	584.293	370.48	119	111
41	K	D	15.1786	18.5672	107.338	83.4688	599.83	366.081	707.168	449.55	122	123
41	K	E	15.5469	17.9029	156.981	110.374	852.743	506.138	1009.72	616.511	138	135
41	K	F	13.5623	17.9069	86.3082	66.8336	550.075	306.395	636.383	373.229	128	120
41	K	G	15.7057	18.5806	81.7992	62.307	439.025	273.027	520.824	335.334	128	119
41	K	H	14.6678	18.8934	114.69	92.6886	667.223	397.899	781.913	490.588	133	120
41	K	I	15.3082	17.8678	75.2404	58.7133	416.263	269.885	491.503	328.598	112	107
41	K	L	14.2908	18.1092	122.479	93.8524	734.573	424.405	857.053	518.257	118	118
41	K	M	14.2021	18.0951	93.8202	72.3543	566.789	327.5	660.609	399.855	108	110
41	K	N	13.9078	16.3692	76.7229	54.8271	474.931	280.113	551.654	334.941	113	106
41	K	P	14.183	17.1637	121.912	90.7236	737.652	437.856	859.564	528.58	134	133
41	K	Q	14.8047	16.9938	100.206	76.9861	576.647	376.039	676.854	453.025	125	126
41	K	R	18.9552	23.132	129.807	97.49	555.004	323.961	684.811	421.451	122	118
41	K	S	14.0289	17.446	101.97	72.8982	624.886	344.952	726.855	417.851	121	108
41	K	T	15.2601	18.2313	114.479	82.5916	635.705	370.429	750.184	453.021	141	130
41	K	V	14.3169	17.2379	137.65	96.9987	823.797	465.707	961.447	562.706	133	123
41	K	W	13.5766	16.4443	116.263	85.6824	740.083	435.365	856.346	521.047	144	140
41	K	Y	14.6925	17.9679	108.435	78.2054	629.594	357.045	738.029	435.25	138	133
42	A	C	24.7607	28.0835	83.6969	58.7572	254.326	150.466	338.023	209.223	93	101
42	A	D	13.8903	14.64	45.9671	33.6156	284.962	195.999	330.929	229.615	118	113
42	A	E	14.6235	19.2214	69.6787	54.5552	406.806	229.27	476.484	283.825	98	94
42	A	F	15.5577	18.9612	54.5727	41.6774	296.203	178.127	350.776	219.804	84	80
42	A	G	86.1746	91.4575	335.332	231.678	53.7986	21.6397	389.13	253.317	109	111
42	A	H	16.8004	17.1489	41.1862	25.9661	203.964	125.45	245.15	151.416	76	74
42	A	I	13.59	14.8793	34.4227	23.7029	218.871	135.599	253.294	159.301	99	91
42	A	K	14.2559	16.2716	46.1776	33.3641	277.742	171.681	323.92	205.046	97	92
42	A	L	15.938	19.3182	38.2006	24.2818	201.483	101.413	239.683	125.694	77	78
42	A	M	14.6017	20.3071	46.0139	32.4928	269.113	127.514	315.127	160.007	93	94
42	A	N	13.2222	14.0875	29.168	16.7201	191.431	101.967	220.599	118.687	92	78
42	A	P	13.773	16.846	57.8097	45.1951	361.923	223.089	419.733	268.284	106	102
42	A	Q	11.9167	14.8703	25.9193	16.9248	191.585	96.891	217.504	113.816	76	77
42	A	R	14.3633	18.5064	67.9857	53.7569	405.343	236.721	473.329	290.478	114	110
42	A	S	18.3644	24.4041	52.6077	46.0285	233.859	142.581	286.466	188.61	80	81
42	A	T	13.1112	16.6995	23.6678	17.65	156.848	88.0414	180.515	105.691	85	75
42	A	V	14.7348	19.4402	104.593	82.7583	605.24	342.949	709.832	425.707	101	103
42	A	W	17.2487	19.7955	129.398	85.0859	620.791	344.739	750.189	429.825	123	114
42	A	Y	17.5566	17.5371	43.4582	28.9224	204.074	135.999	247.532	164.922	79	83
43	L	A	20.158	17.4983	22.0595	15.9364	87.3735	75.1377	109.433	91.0742	75	75
43	L	C	42.5496	47.5084	33.5454	22.9221	45.293	25.3264	78.8385	48.2486	60	58
43	L	D	11.7087	12.821	19.8606	13.0942	149.761	89.0366	169.622	102.131	92	84
43	L	E	10.2859	13.8375	47.7683	36.7093	416.637	228.579	464.405	265.288	94	94
43	L	F	34.7438	32.0881	14.3165	8.246	26.8893	17.452	41.2058	25.698	39	39
43	L	G	12.1011	18.4486	34.6858	27.2235	251.949	120.341	286.634	147.564	82	81
43	L	H	14.2886	16.4396	16.2581	11.5093	97.5254	58.5006	113.784	70.0099	68	70
43	L	I	65.1332	65.8793	41.809	28.4926	22.381	14.7571	64.19	43.2496	73	69
43	L	K	13.8713	16.4755	29.4634	23.1882	182.942	117.555	212.405	140.744	91	90
43	L	M	69.907	72.0472	160.63	112.093	69.1468	43.4897	229.777	155.583	91	86
43	L	N	13.1044	12.8991	15.5797	11.0473	103.309	74.5967	118.889	85.6441	83	74
43	L	P	10.8026	11.575	14.2346	7.18747	117.535	54.9073	131.77	62.0948	76	74
43	L	Q	17.0628	19.2056	90.823	65.2077	441.463	274.316	532.286	339.524	120	119
43	L	R	15.3923	15.8996	17.2113	13.3983	94.6068	70.8699	111.818	84.2682	81	76
43	L	S	13.9973	18.8145	60.9678	47.628	374.6	205.517	435.568	253.145	98	92
43	L	T	16.1396	17.3582	13.4158	11.2228	69.7078	53.4313	83.1236	64.654	78	79
43	L	V	38.8741	38.2198	29.2382	23.1239	45.9743	37.3785	75.2125	60.5024	72	72
43	L	W	16.9326	15.4283	31.2471	19.7641	153.291	108.339	184.538	128.103	104	100
43	L	Y	18.0276	12.7676	9.96538	5.03532	45.3131	34.4031	55.2784	39.4384	65	56
44	G	A	27.1225	33.8016	65.5469	48.0549	176.123	94.1125	241.67	142.167	90	86
44	G	C	45.3536	55.3414	18.8079	14.3516	22.6615	11.5812	41.4694	25.9328	53	48
44	G	D	21.3924	26.5438	70.0033	59.8274	257.232	165.564	327.235	225.391	104	104
44	G	E	24.3275	26.3962	121.471	88.7322	377.843	247.424	499.313	336.156	109	107
44	G	F	11.4004	24.5308	7.96529	6.44767	61.9035	19.8364	69.8688	26.284	62	50
44	G	H	24.6664	18.1615	16.185	8.56181	49.4306	38.5807	65.6156	47.1425	53	56
44	G	I	12.3111	18.0694	15.5534	12.0971	110.783	54.8506	126.336	66.9476	85	88
44	G	K	21.9458	37.3861	45.6337	40.3177	162.304	67.5238	207.938	107.841	98	89
44	G	L	23.2312	33.8513	22.4163	15.5446	74.0758	30.3757	96.4921	45.9203	86	77
44	G	M	26.6478	37.285	27.6095	17.2289	75.9993	28.9798	103.609	46.2087	93	86
44	G	N	43.3324	49.8698	31.9226	22.9923	41.7465	23.1124	73.6691	46.1047	74	63
44	G	P	11.5077	11.1054	10.5619	5.79852	81.2189	46.4151	91.7808	52.2136	71	63
44	G	Q	47.4857	50.3803	86.4778	57.4647	95.6353	56.5971	182.113	114.062	98	94
44	G	R	32.597	40.4009	26.6767	22.7642	55.1611	33.5816	81.8378	56.3458	82	79
44	G	S	31.635	34.1409	79.3195	60.4414	171.414	116.594	250.734	177.035	96	90
44	G	T	16.1052	21.8725	18.6763	14.22	97.2883	50.7931	115.965	65.0131	87	77
44	G	V	19.1961	18.8751	81.7319	54.5815	344.041	234.59	425.773	289.172	118	124
44	G	W	12.0438	18.2955	10.0005	9.78993	73.0339	43.7201	83.0344	53.5101	75	72
44	G	Y	25.1905	15.5582	17.7815	8.11442	52.8068	44.0407	70.5883	52.1552	81	78
45	I	A	16.2898	20.0549	68.7313	50.4848	353.197	201.249	421.929	251.734	85	89
45	I	C	32.3243	35.7363	111.584	78.5914	233.618	141.329	345.202	219.921	78	81
45	I	D	15.3781	18.1454	91.4166	71.7314	503.042	323.583	594.459	395.315	82	80
45	I	E	15.7873	17.9962	83.8285	60.7631	447.16	276.881	530.988	337.644	96	93
45	I	F	21.2756	24.7909	44.7389	31.405	165.543	95.2747	210.282	126.68	49	54
45	I	G	15.4686	17.5462	73.9421	53.5815	404.071	251.792	478.013	305.373	70	72
45	I	H	14.4572	18.3538	75.1527	55.5728	444.675	247.213	519.828	302.786	80	84
45	I	K	16.6729	19.8219	46.5022	35.1157	232.406	142.04	278.908	177.156	67	65
45	I	L	59.8708	61.1875	174.64	129.778	117.055	82.3209	291.694	212.099	89	95
45	I	M	27.0656	30.1759	110.321	77.2668	297.285	178.788	407.606	256.055	84	86
45	I	N	17.4537	20.611	82.4951	60.7222	390.155	233.889	472.65	294.611	99	97
45	I	P	15.9027	18.6711	88.5393	65.3101	468.218	284.482	556.758	349.792	103	100
45	I	Q	16.9166	21.7323	93.2968	72.7578	458.213	262.034	551.51	334.791	90	82
45	I	R	19.433	20.8188	100.402	72.4303	416.256	275.478	516.659	347.909	103	99
45	I	S	14.8607	18.8298	53.8797	42.6511	308.686	183.857	362.566	226.508	76	76
45	I	T	37.809	37.1137	137.673	101.057	226.455	171.234	364.128	272.291	86	88
45	I	V	73.5818	73.7802	165.832	129.339	59.5391	45.9643	225.372	175.304	73	75
45	I	W	15.0145	18.7285	71.7636	55.8389	406.198	242.311	477.962	298.15	90	87
45	I	Y	17.6341	17.4385	78.6353	50.3094	367.293	238.187	445.929	288.496	80	78
46	S	A	77.8228	83.2987	241.59	176.184	68.8462	35.3248	310.437	211.508	82	75
46	S	C	78.8169	80.6226	345.472	257.1	92.8502	61.7933	438.323	318.893	93	90
46	S	D	64.1201	68.5412	254.696	178.921	142.521	82.1205	397.217	261.041	106	97
46	S	E	71.9385	77.5341	294.295	216.303	114.797	62.6749	409.092	278.977	109	103
46	S	F	78.1807	74.1159	132.603	94.9518	37.0078	33.1608	169.611	128.113	81	84
46	S	G	73.0391	77.5551	351.85	261.047	129.878	75.5485	481.728	336.596	104	100
46	S	H	74.9625	80.476	293.531	224.932	98.0397	54.57	391.571	279.502	86	87
46	S	I	74.6328	74.9309	194.948	134.182	66.2615	44.8923	261.209	179.074	97	91
46	S	K	86.1731	87.0167	324.091	234.83	52.002	35.0376	376.093	269.867	84	84
46	S	L	65.2134	65.343	181.488	123.029	96.8108	65.253	278.299	188.282	98	86
46	S	M	74.4449	80.4385	242.31	173.189	83.1791	42.1172	325.489	215.307	98	96
46	S	N	80.9296	85.5423	253.986	199.641	59.8497	33.7419	313.835	233.383	79	76
46	S	P	37.0246	43.5084	172.341	122.374	293.137	158.891	465.479	281.265	90	94
46	S	Q	81.566	85.1211	377.298	280.727	85.2696	49.07	462.568	329.797	103	104
46	S	R	85.9306	88.7801	475.759	336.01	77.8961	42.4645	553.655	378.474	106	102
46	S	T	83.9359	88.0053	405.791	295.049	77.6624	40.2137	483.453	335.263	108	104
46	S	V	79.6805	84.3015	280.92	197.694	71.638	36.8142	352.558	234.508	104	105
46	S	W	72.8701	74.3488	220.896	157.85	82.2408	54.4598	303.137	212.309	76	76
46	S	Y	80.7237	82.3633	297.119	218.677	70.9501	46.8258	368.069	265.503	93	97
47	Y	A	63.2222	66.4809	177.225	147.463	103.096	74.3496	280.32	221.813	69	64
47	Y	C	63.2252	73.113	231.441	167.569	134.617	61.623	366.057	229.192	76	76
47	Y	D	28.381	33.5378	184.675	142.305	466.024	282.007	650.7	424.312	102	100
47	Y	E	28.2836	35.2093	132.831	97.5835	336.807	179.569	469.638	277.153	103	99
47	Y	F	49.176	55.5055	78.1879	52.5025	80.8081	42.0872	158.996	94.5896	69	64
47	Y	G	46.3805	53.6439	206.466	151.294	238.691	130.74	445.157	282.033	91	93
47	Y	H	51.6219	57.8645	172.271	120.26	161.446	87.5705	333.717	207.831	96	101
47	Y	I	63.0907	67.0176	159.353	117.701	93.2242	57.9262	252.577	175.628	90	86
47	Y	K	56.1271	61.8011	301.69	209.948	235.822	129.768	537.512	339.716	105	104
47	Y	L	43.3232	51.3341	135.194	97.7999	176.864	92.7166	312.058	190.517	75	72
47	Y	M	40.9859	45.7523	155.925	114.619	224.512	135.902	380.437	250.522	84	89
47	Y	N	82.6342	88.3087	340.902	251.082	71.6413	33.2409	412.543	284.323	94	88
47	Y	P	46.7245	53.8813	131.106	97.4373	149.487	83.3996	280.593	180.837	91	88
47	Y	Q	48.1652	53.9068	282.206	205.369	303.707	175.602	585.913	380.971	120	120
47	Y	R	51.5344	52.8198	219.794	156.873	206.706	140.124	426.5	296.996	101	105
47	Y	S	65.0201	68.8724	308.219	239.339	165.817	108.172	474.036	347.51	88	82
47	Y	T	68.2168	68.566	193.208	144.709	90.0184	66.3416	283.226	211.05	86	91
47	Y	V	64.5104	67.3144	294.745	200.904	162.151	97.5522	456.895	298.456	112	108
47	Y	W	30.8582	35.6698	141.103	110.672	316.16	199.596	457.263	310.268	96	95
48	G	A	78.9548	83.637	419.757	299.154	111.885	58.5273	531.642	357.682	104	97
48	G	C	69.4877	77.9158	86.6532	65.2487	38.0498	18.4939	124.703	83.7426	81	79
48	G	D	39.7174	41.8363	131.392	87.3374	199.426	121.423	330.818	208.76	95	99
48	G	E	61.325	64.4124	315.743	210.124	199.125	116.093	514.868	326.217	112	104
48	G	F	76.4164	79.9992	154.876	109.996	47.7976	27.5004	202.673	137.497	87	85
48	G	H	82.9207	88.6252	290.426	211.22	59.8197	27.1097	350.246	238.33	113	113
48	G	I	81.6748	82.4377	327.831	225.914	73.5548	48.1282	401.386	274.042	95	89
48	G	K	81.4153	85.8088	407.896	279.382	93.1107	46.2047	501.007	325.586	103	101
48	G	L	82.2276	82.8945	438.366	298.289	94.747	61.5528	533.113	359.842	110	107
48	G	M	79.4899	82.9311	417.113	302.242	107.624	62.2074	524.737	364.45	101	100
48	G	N	81.361	82.0902	252.503	193.781	57.846	42.2775	310.349	236.059	107	105
48	G	P	77.9033	78.8658	319.261	222.853	90.556	59.7195	409.817	282.572	105	108
48	G	Q	82.4011	81.122	347.648	251.415	74.2494	58.5073	421.897	309.923	95	96
48	G	R	85.0788	84.3581	465.443	340.604	81.6296	63.1558	547.073	403.76	94	92
48	G	S	80.0457	83.1073	417.476	288.628	104.071	58.6675	521.547	347.295	107	104
48	G	T	82.2634	86.6983	283.627	216.072	61.1521	33.1508	344.779	249.222	98	101
48	G	V	85.0752	85.0732	554.456	413.677	97.2683	72.5831	651.724	486.26	119	114
48	G	W	78.8644	85.621	524.507	391.159	140.568	65.6904	665.075	456.849	103	108
48	G	Y	75.8558	89.9119	133.173	105.005	42.3877	11.7816	175.561	116.787	87	90
49	R	A	63.6118	65.9754	358.151	250.351	204.876	129.11	563.027	379.461	131	114
49	R	C	59.5374	55.9671	305.128	205.852	207.37	161.957	512.499	367.809	128	130
49	R	D	24.532	27.3711	148.943	111.935	458.193	297.018	607.136	408.953	100	103
49	R	E	33.5225	37.2089	234.309	172.859	464.652	291.705	698.961	464.564	124	130
49	R	F	53.1798	62.5766	258.527	191.687	227.611	114.637	486.137	306.324	102	96
49	R	G	69.6663	74.0019	280.11	203.352	121.964	71.441	402.073	274.793	97	98
49	R	H	66.633	73.2993	319.343	219.782	159.913	80.0601	479.256	299.842	100	95
49	R	I	56.8607	61.7188	285.689	213.87	216.747	132.653	502.436	346.523	123	120
49	R	K	81.072	87.4521	468.583	340.735	109.401	48.8896	577.984	389.625	121	123
49	R	L	51.6486	55.5551	299.558	205.01	280.434	164.011	579.992	369.02	113	107
49	R	M	60.4164	61.814	252.363	180.272	165.343	111.364	417.706	291.636	111	116
49	R	N	58.1772	58.4303	245.538	174.868	176.514	124.408	422.051	299.276	118	119
49	R	P	63.697	64.7294	309.892	230.572	176.617	125.637	486.509	356.209	117	113
49	R	Q	63.4246	68.4641	327.77	229.09	189.017	105.523	516.786	334.613	106	104
49	R	S	56.4542	62.6108	334.367	243.292	257.913	145.286	592.279	388.578	118	120
49	R	T	56.5162	61.8812	294.742	195.667	226.776	120.531	521.518	316.198	112	105
49	R	V	62.0958	66.1012	322.34	235.011	196.761	120.521	519.1	355.532	126	123
49	R	W	51.6925	54.2606	298.926	215.519	279.352	181.673	578.278	397.192	139	136
49	R	Y	60.8628	64.0236	343.086	233.52	220.618	131.221	563.704	364.74	111	112
50	K	A	43.2486	48.1632	99.455	78.7055	130.506	84.7086	229.961	163.414	68	68
50	K	C	42.3122	42.071	192.512	127.468	262.468	175.515	454.98	302.983	132	118
50	K	D	31.6702	35.2992	156.367	114.251	337.368	209.414	493.735	323.665	125	122
50	K	E	22.7276	25.1053	101.005	73.7403	343.41	219.983	444.414	293.724	110	112
50	K	F	40.4865	46.0002	168.523	114.035	247.721	133.865	416.243	247.9	121	116
50	K	G	44.9575	46.2173	200.249	141.896	245.169	165.123	445.419	307.018	114	111
50	K	H	58.6219	61.7281	219.089	157.674	154.643	97.7592	373.733	255.433	110	105
50	K	I	34.7037	39.7279	169.061	131.813	318.093	199.977	487.154	331.79	125	120
50	K	L	38.7452	43.698	190.246	140.77	300.771	181.372	491.017	322.142	113	118
50	K	M	39.4881	43.1288	161.99	131.954	248.235	173.999	410.225	305.953	112	115
50	K	N	46.472	46.3497	243.52	170.938	280.494	197.863	524.014	368.801	122	122
50	K	P	48.4483	53.2751	190.646	142.404	202.859	124.896	393.505	267.3	96	100
50	K	Q	48.5466	52.4899	235.818	160.692	249.938	145.447	485.756	306.138	115	110
50	K	R	83.6334	84.7512	438.117	321.892	85.7372	57.9162	523.854	379.809	124	130
50	K	S	54.3908	55.9705	250.977	176.64	210.456	138.955	461.433	315.595	98	103
50	K	T	43.2414	46.9465	187.14	139.936	245.64	158.14	432.781	298.076	134	131
50	K	V	47.9599	51.4783	171.824	131.234	186.442	123.697	358.266	254.931	118	111
50	K	W	38.0313	39.8403	161.692	109.119	263.463	164.772	425.155	273.891	123	123
50	K	Y	37.2298	41.6457	156.893	118.558	264.525	166.125	421.418	284.683	126	120
51	K	A	54.8922	58.8024	189.407	134.901	155.645	94.5133	345.052	229.414	71	67
51	K	C	56.61	61.3133	269.597	202.156	206.639	127.554	476.236	329.71	100	96
51	K	D	32.5821	37.3042	156.349	113.497	323.513	190.75	479.863	304.246	114	114
51	K	E	35.8951	43.6269	176.886	131.199	315.899	169.531	492.785	300.73	109	109
51	K	F	72.4892	78.9968	273.463	206.214	103.784	54.8272	377.247	261.042	103	101
51	K	G	62.1875	59.5351	194.401	138.357	118.203	94.0391	312.604	232.396	90	87
51	K	H	77.7085	79.4991	263.223	185.895	75.5084	47.9379	338.731	233.833	76	73
51	K	I	65.7465	74.6485	248.327	171.657	129.377	58.2969	377.705	229.954	85	85
51	K	L	57.2046	61.0146	250.275	182.43	187.233	116.564	437.508	298.993	89	86
51	K	M	62.4865	68.5381	371.333	271.802	222.929	124.769	594.262	396.571	130	130
51	K	N	68.4163	73.2124	260.854	192.816	120.421	70.5493	381.275	263.365	99	98
51	K	P	59.0319	59.377	239.017	164.914	165.877	112.827	404.895	277.741	89	90
51	K	Q	65.0967	65.857	323.173	223.695	173.278	115.973	496.451	339.667	111	116
51	K	R	75.3877	83.7045	295.11	207.44	96.3466	40.384	391.457	247.824	88	86
51	K	S	59.2645	62.7889	302.409	207.624	207.861	123.046	510.27	330.669	89	86
51	K	T	66.61	69.5258	302.304	221.045	151.538	96.8876	453.842	317.933	114	107
51	K	V	68.7756	74.1347	220.931	158.964	100.304	55.4617	321.235	214.425	104	99
51	K	W	69.3875	71.3881	389.852	283.733	171.995	113.718	561.847	397.451	106	108
51	K	Y	72.7385	77.6943	315.717	228.949	118.327	65.7305	434.044	294.68	106	107
52	R	A	55.0376	61.8885	245.667	178.64	200.695	110.008	446.361	288.648	105	103
52	R	C	50.7532	56.9525	211.194	144.831	204.926	109.471	416.12	254.302	95	97
52	R	D	25.3846	29.2192	128.152	92.4605	376.691	223.977	504.843	316.438	94	92
52	R	E	30.3834	34.4834	142.191	108.365	325.797	205.887	467.988	314.252	104	107
52	R	F	61.5963	69.3337	237.216	167.932	147.898	74.2762	385.114	242.208	99	86
52	R	G	49.1039	52.0011	300.242	217.563	311.2	200.818	611.443	418.381	124	120
52	R	H	67.9172	64.8734	196.176	146.261	92.6699	79.1952	288.846	225.456	85	79
52	R	I	57.5108	65.8618	156.042	109.268	115.285	56.6372	271.327	165.905	97	99
52	R	K	70.241	80.6277	256.188	186.009	108.539	44.6919	364.726	230.701	99	95
52	R	L	56.651	65.2492	233.52	171.517	178.688	91.3475	412.207	262.864	110	108
52	R	M	61.8699	63.5956	115.286	84.8987	71.0502	48.5991	186.336	133.498	72	73
52	R	N	53.4239	56.8031	216.221	152.107	188.506	115.672	404.726	267.779	94	93
52	R	P	69.3397	71.5219	310.944	225.844	137.492	89.9248	448.437	315.769	120	122
52	R	Q	57.8367	64.3758	202.097	136.866	147.33	75.7388	349.427	212.605	92	95
52	R	S	61.0137	62.6163	215.677	156.192	137.813	93.2509	353.489	249.443	112	113
52	R	T	51.1467	55.6623	179.517	124.129	171.468	98.8746	350.985	223.003	101	98
52	R	V	56.5301	60.175	310.322	234.844	238.627	155.425	548.949	390.269	127	132
52	R	W	60.2576	70.8284	260.749	193.623	171.975	79.7462	432.724	273.369	115	118
52	R	Y	71.7262	69.0733	280.803	195.249	110.69	87.4203	391.492	282.669	102	99
53	R	A	71.5682	76.4724	312.418	227.42	124.114	69.9683	436.532	297.388	106	98
53	R	C	62.6932	70.1315	229.941	163.087	136.831	69.4573	366.771	232.544	80	81
53	R	D	21.9873	24.0253	123.918	92.0921	439.673	291.221	563.591	383.313	113	113
53	R	E	20.3362	23.6842	85.7409	59.2543	335.876	190.93	421.617	250.184	81	80
53	R	F	44.3935	48.0373	144.404	101.414	180.878	109.701	325.283	211.115	85	86
53	R	G	81.8313	85.7817	396.852	276.706	88.1115	45.8641	484.964	322.57	103	100
53	R	H	62.7762	69.0247	250.831	189.448	148.733	85.0158	399.563	274.463	102	99
53	R	I	49.9168	55.3612	198.983	134.884	199.646	108.759	398.629	243.643	96	103
53	R	K	79.8177	82.9014	227.107	159.709	57.4253	32.9404	284.532	192.65	80	78
53	R	L	44.5427	48.1982	158.61	113.97	197.475	122.491	356.085	236.461	86	80
53	R	M	51.5181	56.7499	134.392	92.3991	126.472	70.4191	260.864	162.818	82	76
53	R	N	60.8856	64.2776	158.192	113.514	101.626	63.0856	259.818	176.6	79	73
53	R	P	70.3004	77.099	300.061	208.799	126.766	62.0204	426.827	270.82	105	95
53	R	Q	76.8307	80.4427	307.453	213.454	92.7166	51.8951	400.17	265.35	91	94
53	R	S	78.0772	83.5501	166.411	123.444	46.7257	24.3046	213.137	147.749	74	74
53	R	T	61.7792	66.9923	209.413	158.314	129.558	78.003	338.971	236.317	83	85
53	R	V	55.1064	55.6728	212.525	150.446	173.137	119.786	385.662	270.232	95	98
53	R	W	41.6439	49.4033	177.824	130.111	249.187	133.254	427.011	263.366	88	85
53	R	Y	49.9268	55.7603	193.489	148.598	194.056	117.896	387.544	266.494	103	96
54	Q	A	78.5468	85.7171	192.132	140.088	52.4762	23.3428	244.608	163.431	76	72
54	Q	C	73.7812	80.6721	258.316	186.19	91.7949	44.6084	350.111	230.798	105	98
54	Q	D	54.9536	63.3869	249.275	171.71	204.335	99.1818	453.609	270.892	112	107
54	Q	E	48.8338	55.8288	202.115	154.937	211.768	122.585	413.883	277.522	108	100
54	Q	F	68.6992	73.5183	303.19	216.718	138.14	78.0631	441.33	294.781	118	109
54	Q	G	88.4445	85.5479	344.648	241.836	45.0292	40.8549	389.677	282.691	101	98
54	Q	H	74.6811	81.3639	399.58	295.242	135.468	67.624	535.049	362.866	112	114
54	Q	I	74.8324	75.9451	299.611	202.682	100.765	64.1977	400.375	266.88	110	103
54	Q	K	75.46	80.4725	285.575	207.501	92.8702	50.3523	378.445	257.853	101	100
54	Q	L	74.8801	77.5472	298.997	210.238	100.304	60.8716	399.3	271.11	100	94
54	Q	M	77.4488	81.9457	263.004	193.255	76.5804	42.5781	339.584	235.833	107	101
54	Q	N	78.3815	82.1651	316.883	226.572	87.4002	49.1802	404.284	275.752	101	93
54	Q	P	75.405	85.7451	287.154	222.186	93.6617	36.9377	380.816	259.124	92	90
54	Q	R	81.1275	79.2662	276.399	192.728	64.2979	50.4124	340.697	243.141	99	99
54	Q	S	81.9629	86.5122	285.47	205.799	62.8218	32.0855	348.291	237.885	93	88
54	Q	T	79.4237	79.7976	289.487	202.501	74.9975	51.2673	364.485	253.768	103	102
54	Q	V	76.5385	75.3704	327.875	236.801	100.504	77.3819	428.379	314.182	115	116
54	Q	W	63.4503	73.1148	233.695	159.139	134.617	58.5173	368.312	217.656	107	107
54	Q	Y	71.12	75.4536	244.196	185.728	99.1618	60.4208	343.357	246.149	87	84
55	R	A	62.6992	63.3617	202.36	141.042	120.387	81.5562	322.748	222.598	98	90
55	R	C	55.3325	57.5985	211.449	155.156	170.693	114.219	382.141	269.376	104	102
55	R	D	40.1534	41.6668	182.552	128.322	272.085	179.649	454.638	307.971	122	128
55	R	E	30.2963	31.9513	132.34	96.1273	304.478	204.729	436.818	300.856	107	108
55	R	F	50.9369	48.8185	162.99	119.76	156.994	125.557	319.985	245.317	80	80
55	R	G	61.7555	64.5238	345.06	245.205	213.692	134.817	558.752	380.022	123	127
55	R	H	77.5389	77.909	336.683	238.88	97.5288	67.7342	434.211	306.614	111	115
55	R	I	55.0735	56.3679	165.476	119.573	134.987	92.5563	300.463	212.129	91	96
55	R	K	87.2492	87.6504	285.955	209.285	41.7899	29.4874	327.745	238.772	89	91
55	R	L	54.7496	60.9054	190.149	140.656	157.158	90.2855	347.307	230.941	91	89
55	R	M	54.2164	58.3097	185.658	127.445	156.781	91.1204	342.439	218.565	95	96
55	R	N	74.2227	70.8843	273.832	193.986	95.101	79.6794	368.933	273.665	102	106
55	R	P	65.9327	65.0434	283.373	211.054	146.418	113.428	429.791	324.482	114	110
55	R	Q	65.8667	68.4653	225.686	160.674	116.954	74.0057	342.64	234.68	106	101
55	R	S	51.3837	60.7146	172.499	124.918	163.209	80.8282	335.709	205.746	70	69
55	R	T	63.7398	67.7418	229.151	161.785	130.359	77.0412	359.51	238.827	114	106
55	R	V	51.0154	52.8486	169.061	116.795	162.331	104.204	331.392	220.999	94	88
55	R	W	54.7618	53.9709	203.062	150.384	167.748	128.255	370.81	278.639	114	119
55	R	Y	49.9107	56.0389	196.805	148.908	197.509	116.814	394.313	265.722	101	99
56	R	A	58.5016	65.6642	196.191	143.17	139.168	74.8639	335.359	218.034	78	73
56	R	C	55.1631	59.2841	208.624	158.227	169.571	108.669	378.195	266.896	99	98
56	R	D	46.4616	47.573	141.083	102.666	162.571	113.141	303.654	215.806	100	94
56	R	E	37.6035	43.3626	180.798	131.018	300.003	171.127	480.801	302.145	112	116
56	R	F	58.3342	61.5507	227.683	168.534	162.625	105.28	390.308	273.814	101	101
56	R	G	67.47	67.1611	233.16	163.894	112.416	80.1369	345.576	244.031	88	83
56	R	H	71.5069	73.8443	327.252	242.143	130.399	85.7672	457.651	327.91	117	111
56	R	I	51.6907	57.1836	215.349	147.457	201.262	110.409	416.612	257.866	87	88
56	R	K	79.9138	83.9634	346.584	254.854	87.113	48.6759	433.697	303.53	105	108
56	R	L	59.5926	61.5202	179.044	132.813	121.403	83.0723	300.446	215.886	83	84
56	R	M	56.549	63.8518	223.929	170.616	172.062	96.5904	395.991	267.207	110	105
56	R	N	71.2168	70.0387	304.892	214.817	123.226	91.8951	428.117	306.712	118	111
56	R	P	67.6714	68.0222	273.144	206.352	130.489	97.0078	403.634	303.36	118	114
56	R	Q	66.4097	72.5755	209.536	151.253	105.984	57.1548	315.52	208.408	96	95
56	R	S	70.9291	75.9335	221.923	164.622	90.9567	52.1756	312.879	216.797	90	91
56	R	T	68.7497	70.1297	190.588	139.825	86.6321	59.5558	277.22	199.381	90	92
56	R	V	61.3386	61.8056	249.462	170.751	157.235	105.52	406.697	276.271	99	99
56	R	W	62.1084	64.8473	225.528	158.92	137.592	86.1479	363.12	245.068	126	127
56	R	Y	65.0731	60.2941	216.121	152.364	115.999	100.337	332.121	252.701	97	93
57	R	A	77.6847	78.7144	237.415	167.137	68.1984	45.1962	305.613	212.333	95	96
57	R	C	62.8732	66.9317	210.58	155.104	124.348	76.6305	334.928	231.734	107	104
57	R	D	56.9638	62.0344	261.392	181.441	197.482	111.044	458.874	292.485	126	122
57	R	E	54.3288	61.2498	196.758	149.475	165.403	94.5667	362.161	244.042	103	100
57	R	F	65.578	71.6103	274.586	195.272	144.131	77.4152	418.717	272.688	109	114
57	R	G	79.5687	79.2009	267.416	185.403	68.6659	48.6893	336.082	234.093	103	104
57	R	H	74.1984	82.3267	329.53	240.497	114.59	51.628	444.12	292.125	119	113
57	R	I	67.4835	70.4853	261.311	184.368	125.911	77.2015	387.221	261.57	98	94
57	R	K	83.5673	84.4218	304.006	218.905	59.7796	40.394	363.785	259.299	101	96
57	R	L	70.4217	69.1793	290.791	197.465	122.137	87.9746	412.929	285.44	114	123
57	R	M	65.8662	72.6202	308.576	215.738	159.913	81.3391	468.489	297.077	123	122
57	R	N	73.5937	76.4869	326.34	224.8	117.095	69.1067	443.435	293.907	118	113
57	R	P	72.0095	77.1344	315.676	238.193	122.705	70.6094	438.381	308.802	125	118
57	R	Q	73.3815	76.9703	390.083	280.124	141.499	83.8136	531.582	363.938	135	139
57	R	S	75.7968	77.5093	314.12	224.765	100.304	65.2196	414.424	289.985	110	102
57	R	T	71.0492	73.5579	369.658	257.933	150.626	92.72	520.284	350.653	130	122
57	R	V	65.9554	74.2385	262.679	190.623	135.589	66.1479	398.268	256.771	120	118
57	R	W	70.3635	72.3186	273.013	182.14	114.991	69.7178	388.004	251.858	113	104
57	R	Y	67.8025	71.5513	331.969	239.742	157.642	95.3214	489.611	335.064	135	140
58	A	C	76.5368	79.0006	227.017	155.809	69.5942	41.4159	296.611	197.224	86	81
58	A	D	79.7191	77.8551	266.442	193.86	67.7843	55.1411	334.227	249.001	99	96
58	A	E	78.1464	79.7872	252.994	177.166	70.7497	44.8823	323.744	222.049	105	103
58	A	F	75.4342	80.285	312.208	233.064	101.673	57.2316	413.881	290.295	98	94
58	A	G	83.9438	84.1686	264.977	181.895	50.6829	34.2127	315.66	216.107	88	84
58	A	H	75.374	87.2908	267.346	188.354	87.3468	27.4236	354.693	215.778	102	104
58	A	I	80.6701	81.298	213.203	147.925	51.087	34.029	264.29	181.954	78	79
58	A	K	82.874	81.4226	370.515	264.743	76.567	60.4041	447.082	325.148	127	124
58	A	L	72.233	75.1521	222.133	159.703	85.3899	52.8035	307.523	212.507	103	98
58	A	M	80.2183	85.3191	305.915	224.04	75.4383	38.5507	381.353	262.59	106	104
58	A	N	75.2961	81.512	311.401	212.84	102.167	48.2752	413.568	261.116	99	101
58	A	P	80.7765	79.3391	350.078	256.565	83.3127	66.8125	433.391	323.377	119	117
58	A	Q	76.941	83.5251	249.398	177.669	74.7437	35.0442	324.141	212.713	91	85
58	A	R	81.528	86.7915	270.697	187.395	61.3324	28.5189	332.029	215.914	94	96
58	A	S	81.683	84.4092	286.821	206.255	64.3179	38.0965	351.138	244.352	98	96
58	A	T	74.2962	84.3554	366.982	267.609	126.963	49.631	493.945	317.24	124	117
58	A	V	77.8507	81.7664	265.644	180.693	75.5785	40.2939	341.223	220.987	111	109
58	A	W	79.766	83.5684	167.482	118.684	42.4845	23.3361	209.966	142.02	76	74
58	A	Y	82.2158	82.3804	360.204	259.123	77.9162	55.4216	438.12	314.545	124	122
59	H	A	76.5767	82.9182	249.421	180.81	76.2932	37.2483	325.714	218.058	89	82
59	H	C	66.4929	81.2452	239.035	178.862	120.454	41.289	359.489	220.151	92	88
59	H	D	75.9042	71.5382	179.886	132.804	57.1047	52.8369	236.99	185.641	67	66
59	H	E	77.9864	82.5037	208.229	149.709	58.7777	31.7482	267.007	181.457	83	84
59	H	F	79.891	85.3487	198.319	145.785	49.9182	25.0259	248.237	170.811	80	82
59	H	G	77.8517	80.4469	277.399	195.98	78.918	47.634	356.317	243.614	88	83
59	H	I	77.4191	78.9882	276.984	200.208	80.7881	53.2576	357.772	253.466	84	89
59	H	K	78.8051	83.4794	282.127	196.772	75.8791	38.9414	358.006	235.714	105	100
59	H	L	79.1163	83.134	209.922	148.489	55.4116	30.1252	265.334	178.615	87	82
59	H	M	80.6017	81.1639	248.515	181.798	59.8096	42.1907	308.324	223.989	97	97
59	H	N	82.9895	82.6073	319.752	226.16	65.5401	47.6173	385.292	273.777	112	109
59	H	P	81.1685	78.7802	297.479	210.22	69.0165	56.6238	366.495	266.844	109	104
59	H	Q	86.7036	87.1612	218.326	158.744	33.4814	23.3829	251.807	182.127	86	85
59	H	R	82.3062	82.8734	324.866	221.107	69.838	45.6938	394.704	266.801	104	105
59	H	S	74.4399	80.8202	276.422	201.284	94.914	47.7676	371.336	249.052	108	111
59	H	T	80.8798	81.5673	288.739	216.402	68.2585	48.903	356.997	265.305	98	96
59	H	V	76.0769	81.5481	210.121	143.1	66.0745	32.3794	276.195	175.48	76	70
59	H	W	74.9621	82.0328	317.161	230.9	105.934	50.5727	423.095	281.472	114	109
59	H	Y	78.874	79.812	258.609	179.658	69.267	45.4433	327.876	225.101	86	86
60	Q	A	77.1248	81.6673	246.912	175.839	73.2343	39.4724	320.146	215.311	90	85
60	Q	C	77.6478	83.4263	257.883	192.606	74.2361	38.2635	332.12	230.869	96	95
60	Q	D	75.2098	76.2602	330.445	230.651	108.92	71.8016	439.365	302.453	119	113
60	Q	E	80.9711	80.9102	244.696	173.499	57.5054	40.935	302.201	214.434	105	106
60	Q	F	80.1505	83.0822	297.628	212.706	73.7085	43.3127	371.337	256.019	109	102
60	Q	G	78.2736	87.0604	259.942	185.365	72.1523	27.5505	332.094	212.916	110	106
60	Q	H	84.2294	79.8461	361.28	240.766	67.644	60.7714	428.924	301.537	114	111
60	Q	I	79.3598	79.0627	367.222	266.053	95.5084	70.4558	462.73	336.509	135	127
60	Q	K	77.8197	78.2729	256.1	188.904	72.9938	52.4361	329.094	241.34	100	96
60	Q	L	82.4159	85.8733	317.138	238.239	67.664	39.1918	384.802	277.431	128	117
60	Q	M	81.2498	83.2228	245.845	174.184	56.734	35.1144	302.579	209.298	109	109
60	Q	N	77.6622	79.8937	311.006	225.993	89.454	56.8743	400.46	282.867	101	98
60	Q	P	79.8098	86.595	286.873	207.29	72.573	32.0888	359.446	239.379	90	85
60	Q	R	84.5668	84.3403	301.049	214.642	54.9407	39.8531	355.99	254.495	114	115
60	Q	S	76.7249	77.9384	426.242	310.769	129.304	87.9679	555.546	398.737	132	123
60	Q	T	82.2475	86.2791	319.337	237.204	68.9264	37.7225	388.263	274.927	115	116
60	Q	V	80.6033	86.1337	306.199	231.564	73.6851	37.2783	379.884	268.842	111	108
60	Q	W	77.0244	81.1262	342.946	244.336	102.298	56.8442	445.244	301.18	122	118
60	Q	Y	75.7525	75.8548	317.84	214.273	101.737	68.205	419.576	282.478	110	105
61	N	A	82.7059	83.967	251.389	168.736	52.5664	32.2191	303.955	200.955	95	88
61	N	C	74.9172	78.977	282.233	199.659	94.4932	53.1474	376.726	252.806	93	88
61	N	D	80.8772	83.3472	217.958	150.726	51.5345	30.1152	269.492	180.842	75	77
61	N	E	84.8748	84.5644	322.41	238.809	57.4553	43.5899	379.865	282.399	91	93
61	N	F	76.3722	85.395	239.792	167.999	74.186	28.7327	313.978	196.732	102	101
61	N	G	81.9344	80.9755	233.774	172.956	51.5445	40.6345	285.319	213.59	94	95
61	N	H	84.4575	82.4619	206.869	150.077	38.0698	31.9185	244.939	181.996	76	75
61	N	I	79.5619	84.3678	276.118	190.974	70.93	35.3849	347.048	226.359	98	96
61	N	K	85.1659	91.2978	232.257	170.482	40.4542	16.2498	272.711	186.732	81	79
61	N	L	77.3915	82.7808	277.095	189.313	80.9484	39.3789	358.043	228.692	99	97
61	N	M	76.0984	81.8326	259.416	186.868	81.4794	41.4861	340.895	228.355	85	82
61	N	P	78.2216	84.9982	181.895	138.217	50.6428	24.3947	232.537	162.612	90	90
61	N	Q	87.002	84.1572	271.986	193.553	40.6345	36.4368	312.621	229.99	84	86
61	N	R	80.7308	86.6872	247.111	177.962	58.9815	27.3301	306.093	205.292	90	90
61	N	S	84.0206	84.7529	149.919	110.04	28.5123	19.7963	178.432	129.837	67	68
61	N	T	83.5898	83.8342	253.626	191.711	49.7913	36.9678	303.417	228.679	88	86
61	N	V	65.0809	68.1603	356.806	262.422	191.444	122.585	548.251	385.006	103	97
61	N	W	80.2553	81.3484	318.033	212.735	78.2434	48.7761	396.276	261.511	98	100
61	N	Y	75.8713	85.3292	226.186	164.903	71.9319	28.352	298.118	193.254	91	95
62	S	A	86.1192	85.3867	308.874	214.718	49.7846	36.7474	358.659	251.465	107	102
62	S	C	76.1473	85.5311	265.232	192.176	83.0823	32.5096	348.314	224.685	102	102
62	S	D	88.2874	87.8199	339.975	243.187	45.1027	33.7285	385.078	276.915	103	103
62	S	E	82.3697	83.9622	203.577	152.417	43.5732	29.1134	247.15	181.53	88	86
62	S	F	86.7099	87.882	288.429	204.548	44.2077	28.205	332.636	232.753	92	92
62	S	G	83.8507	90.3867	308.672	231.721	59.449	24.6452	368.121	256.367	93	97
62	S	H	86.4158	87.5376	335.144	225.233	52.6832	32.0654	387.828	257.298	120	113
62	S	I	84.2027	87.9417	373.851	264.346	70.1386	36.2464	443.99	300.592	132	122
62	S	K	83.0141	86.9472	289.022	213.817	59.1384	32.0988	348.161	245.916	106	101
62	S	L	77.0569	84.3276	292.511	205.343	87.093	38.1633	379.604	243.506	101	94
62	S	M	72.6518	83.9342	330.682	255.942	124.478	48.9898	455.16	304.932	115	121
62	S	N	79.1851	85.7112	271.399	200.176	71.3408	33.3712	342.74	233.547	107	103
62	S	P	80.8807	83.3309	241.345	160.633	57.0513	32.1322	298.396	192.766	100	93
62	S	Q	83.6505	91.2571	298.423	218.203	58.3269	20.905	356.75	239.108	103	102
62	S	R	85.8588	84.5894	323.963	232.502	53.3578	42.3576	377.32	274.86	104	102
62	S	T	86.1529	87.7518	336.902	244.397	54.1493	34.1125	391.051	278.51	122	125
62	S	V	84.8503	86.1176	307.488	229.531	54.9006	37.0012	362.389	266.532	95	98
62	S	W	85.8114	86.8654	237.029	176.175	39.1918	26.6388	276.221	202.814	106	100
62	S	Y	80.5814	82.5749	295.669	210.981	71.2506	44.5216	366.92	255.502	101	98
63	Q	A	77.0593	84.1171	278.148	200.594	82.8051	37.8761	360.953	238.47	80	85
63	Q	C	71.555	75.7555	181.839	142.954	72.2858	45.7505	254.125	188.705	67	66
63	Q	D	80.8256	83.1788	193.711	138.612	45.9542	28.0314	239.665	166.643	73	77
63	Q	E	83.5001	85.301	293.347	194.764	57.9663	33.5615	351.313	228.325	95	91
63	Q	F	78.8328	78.8807	223.122	162.247	59.9098	43.4396	283.031	205.687	96	93
63	Q	G	77.716	86.5822	264.164	203.98	75.7455	31.6113	339.91	235.592	92	94
63	Q	H	77.3926	77.6278	295.084	212.396	86.198	61.2122	381.282	273.608	110	107
63	Q	I	79.733	80.7958	290.242	206.981	73.7752	49.1969	364.017	256.177	86	87
63	Q	K	88.2278	89.7576	270.451	194.553	36.0862	22.2007	306.537	216.754	103	98
63	Q	L	84.0875	84.386	339.349	235.853	64.2177	43.64	403.567	279.493	116	110
63	Q	M	83.6344	87.0271	250.152	182.535	48.9497	27.2099	299.102	209.745	90	89
63	Q	N	78.8154	84.1196	299.409	213.493	80.4775	40.3039	379.886	253.796	98	89
63	Q	P	76.9897	81.9108	279.961	205.457	83.6734	45.3732	363.634	250.83	103	101
63	Q	R	80.0499	81.7726	290.154	200.185	72.3126	44.6218	362.467	244.807	111	104
63	Q	S	75.9863	80.2703	303.95	216.326	96.0561	53.1708	400.006	269.497	96	94
63	Q	T	79.0351	82.3097	226.18	170.792	59.9967	36.7073	286.177	207.499	99	93
63	Q	V	85.1103	86.2107	327.673	233.441	57.3251	37.3384	384.998	270.779	103	101
63	Q	W	77.4018	86.596	226.37	163.815	66.0912	25.3565	292.461	189.171	85	83
63	Q	Y	72.8388	82.9955	255.661	199.992	95.3348	40.9751	350.996	240.967	95	98
64	T	A	81.9437	83.7001	243.924	174.14	53.7485	33.9122	297.672	208.052	97	91
64	T	C	84.1968	77.4181	276.346	195.933	51.8684	57.1514	328.215	253.085	102	97
64	T	D	81.8561	84.9248	241.959	166.265	53.6316	29.5141	295.59	195.779	81	82
64	T	E	83.7593	87.9753	213.735	148.498	41.4426	20.2972	255.178	168.795	93	91
64	T	F	75.6086	79.9233	201.05	154.61	64.8589	38.8379	265.909	193.447	82	80
64	T	G	79.8893	80.7385	232.286	172.26	58.4739	41.0953	290.76	213.355	87	88
64	T	H	78.585	85.0089	220.876	155.206	60.1903	27.3702	281.066	182.576	78	75
64	T	I	81.8905	85.0139	225.335	158.165	49.8313	27.8811	275.167	186.046	88	86
64	T	K	78.1681	79.7611	326.419	231.09	91.1671	58.6375	417.586	289.727	96	98
64	T	L	82.068	84.6379	264.954	184.172	57.8928	33.4279	322.847	217.6	97	98
64	T	M	87.9495	87.5374	304.83	207.448	41.7666	29.5341	346.597	236.983	121	116
64	T	N	81.2807	85.9036	221.896	166.183	51.1037	27.27	273	193.453	93	90
64	T	P	78.4742	87.7872	244.52	184.21	67.073	25.627	311.593	209.837	91	87
64	T	Q	81.0429	82.3709	320.448	225.812	74.9574	48.3286	395.405	274.14	108	104
64	T	R	82.5608	82.5823	321.758	251.117	67.9646	52.9638	389.722	304.081	118	112
64	T	S	91.4523	83.8239	203.334	142.454	19.0048	27.4904	222.339	169.944	62	57
64	T	V	79.0334	83.7313	295.113	210.753	78.2902	40.9484	373.403	251.701	96	94
64	T	W	79.3015	79.3444	239.766	171.072	62.5814	44.535	302.347	215.607	94	90
64	T	Y	82.6684	85.4675	259.316	195.886	54.3663	33.3077	313.683	229.194	100	100
65	H	A	81.1993	86.0421	275.276	203.963	63.7368	33.0873	339.013	237.05	98	99
65	H	C	81.0814	80.5806	337.454	242.111	78.7377	58.347	416.192	300.458	106	106
65	H	D	84.8408	87.8121	337.762	253.284	60.3506	35.1544	398.112	288.438	104	102
65	H	E	78.0196	84.3423	378.895	256.389	106.746	47.5973	485.641	303.987	102	99
65	H	F	79.586	83.1271	372.14	256.854	95.455	52.1356	467.595	308.99	118	111
65	H	G	82.9801	86.7351	332.694	242.813	68.2384	37.1347	400.932	279.947	106	100
65	H	I	80.6902	84.303	348.391	255	83.3728	47.4804	431.764	302.481	121	115
65	H	K	77.3207	82.4533	417.178	300.918	122.364	64.0374	539.542	364.955	115	116
65	H	L	82.923	86.6105	269.214	202.448	55.4416	31.2974	324.656	233.746	125	122
65	H	M	77.6303	83.751	334.922	251.988	96.5103	48.8896	431.432	300.878	134	126
65	H	N	77.6832	82.2939	453.109	319.515	130.169	68.746	583.278	388.261	110	102
65	H	P	77.1261	83.98	330.165	238.643	97.9195	45.5235	428.084	284.166	111	116
65	H	Q	84.7347	84.9662	333.437	223.765	60.0701	39.5926	393.507	263.358	129	126
65	H	R	86.095	87.349	266.109	189.255	42.9788	27.4102	309.088	216.665	107	104
65	H	S	80.7438	83.784	497.211	361.543	118.577	69.9749	615.788	431.518	133	133
65	H	T	79.9692	83.451	418.815	307.629	104.906	61.0052	523.721	368.634	129	125
65	H	V	84.7867	83.1012	256.614	179.658	46.0444	36.5336	302.659	216.191	116	109
65	H	W	78.644	83.4816	369.444	259.907	100.324	51.4276	469.768	311.335	120	121
65	H	Y	80.9916	81.4927	283.61	207.51	66.562	47.1264	350.172	254.636	105	98
66	Q	A	83.9105	83.3877	320.629	239.005	61.4794	47.614	382.109	286.619	105	101
66	Q	C	75.2035	76.9805	349.537	257.258	115.251	76.9277	464.788	334.185	115	116
66	Q	D	83.064	83.202	406.107	280.364	82.8018	56.6038	488.909	336.968	105	104
66	Q	E	82.5202	84.6384	331.165	245.082	70.1486	44.4815	401.313	289.563	111	100
66	Q	F	74.3795	78.9343	377.731	260.123	130.112	69.4206	507.843	329.544	134	130
66	Q	G	79.9293	85.9586	231.455	169.476	58.1199	27.6841	289.575	197.16	100	93
66	Q	H	78.5024	83.9455	256.38	190.991	70.2087	36.527	326.589	227.518	99	100
66	Q	I	70.0482	77.7642	255.761	174.903	109.36	50.0117	365.121	224.915	91	90
66	Q	K	77.5018	76.9286	297.418	204.404	86.3383	61.3024	383.756	265.707	96	96
66	Q	L	80.6183	81.0012	335.788	234.879	80.728	55.091	416.516	289.97	112	113
66	Q	M	71.0254	84.0057	230.403	159.259	93.9923	30.3223	324.395	189.581	86	75
66	Q	N	76.1062	73.4654	280.364	205.562	88.0214	74.2461	368.385	279.808	85	87
66	Q	P	76.7313	85.1543	372.754	268.074	113.037	46.7357	485.792	314.81	131	124
66	Q	R	78.4594	79.5681	277.294	215.712	76.1296	55.3915	353.423	271.103	93	92
66	Q	S	69.7236	78.1668	284.715	214.846	123.633	60.01	408.348	274.856	93	98
66	Q	T	75.1171	81.708	361.251	254.065	119.666	56.8776	480.917	310.942	97	99
66	Q	V	79.4362	80.3591	362.929	245.117	93.9522	59.9098	456.882	305.027	104	100
66	Q	W	70.0767	74.8416	242.924	177.804	103.73	59.7696	346.654	237.573	110	110
66	Q	Y	75.0947	73.8869	280.355	193.553	92.9804	68.4054	373.336	261.958	102	99
67	A	C	77.9676	76.5905	292.178	214.694	82.5647	65.6203	374.742	280.315	91	92
67	A	D	79.2795	84.1485	350.122	266.074	91.5077	50.1219	441.63	316.196	102	103
67	A	E	78.2896	81.1382	330.454	242.976	91.638	56.4835	422.092	299.46	99	97
67	A	F	73.4198	74.4893	301.429	208.086	109.127	71.264	410.556	279.35	93	95
67	A	G	78.264	82.1997	312.752	235.02	86.8592	50.8933	399.611	285.913	84	79
67	A	H	74.9141	77.6242	268.124	187.746	89.7846	54.1192	357.908	241.865	106	101
67	A	I	75.5569	79.3468	289.821	213.384	93.7585	55.5418	383.579	268.926	91	82
67	A	K	82.5099	79.0847	175.751	127.912	37.255	33.8287	213.006	161.741	84	81
67	A	L	78.513	83.1763	255.345	177.254	69.8814	35.8524	325.227	213.106	97	96
67	A	M	74.2321	80.0914	299.114	217.665	103.83	54.1059	402.944	271.771	122	110
67	A	N	76.9425	79.7512	347.104	235.38	104.017	59.7629	451.121	295.142	102	94
67	A	P	73.9893	84.599	289.426	207.799	101.747	37.8293	391.172	245.629	91	87
67	A	Q	76.2796	83.7609	295.493	217.308	91.8884	42.1306	387.382	259.439	105	107
67	A	R	80.0528	86.5755	262.948	188.401	65.5201	29.2136	328.468	217.614	98	96
67	A	S	82.1715	83.5826	268.305	196.062	58.2134	38.5106	326.518	234.572	100	95
67	A	T	78.8301	78.5381	325.34	233.02	87.3702	63.6767	412.71	296.696	93	92
67	A	V	75.0866	83.7925	208.492	165.692	69.1768	32.0488	277.669	197.741	91	93
67	A	W	67.546	74.9048	234.491	159.563	112.667	53.458	347.157	213.021	96	87
67	A	Y	74.7052	77.2099	312.272	218.624	105.734	64.5316	418.006	283.156	98	97
68	S	A	79.4435	81.8862	199.123	147.463	51.5245	32.6198	250.648	180.083	89	86
68	S	C	77.7206	81.3085	237.266	172.359	68.0147	39.6226	305.28	211.982	88	83
68	S	D	82.9842	83.0144	256.638	182.991	52.6231	37.442	309.261	220.433	86	87
68	S	E	79.7275	82.7808	372.357	275.428	94.6802	57.2917	467.037	332.72	106	106
68	S	F	76.7069	76.8951	245.161	180.114	74.4465	54.1192	319.607	234.233	92	85
68	S	G	79.3373	85.0484	272.217	219.589	70.8966	38.6041	343.114	258.193	92	93
68	S	H	81.9882	82.9524	232.391	166.201	51.0536	34.1559	283.445	200.357	80	80
68	S	I	73.776	76.1906	234.929	171.751	83.5064	53.6717	318.436	225.423	108	101
68	S	K	79.5658	79.008	312.073	222.291	80.1469	59.0616	392.22	281.353	108	107
68	S	L	81.3501	87.7027	170.224	125.895	39.0249	17.6524	209.249	143.547	79	72
68	S	M	75.3704	80.1704	236.309	167.119	77.2216	41.3358	313.531	208.455	93	90
68	S	N	81.1844	79.804	275.007	199.863	63.7368	50.5794	338.744	250.443	90	85
68	S	P	78.445	78.754	296.417	210.449	81.4493	56.7741	377.867	267.223	116	112
68	S	Q	83.768	87.4657	214.01	159.3	41.4694	22.8285	255.479	182.128	65	65
68	S	R	85.9061	83.2547	225.613	154.276	37.0145	31.0302	262.627	185.306	92	92
68	S	T	80.6347	84.076	239.029	174.078	57.4052	32.9704	296.434	207.049	100	94
68	S	V	85.2448	79.2325	178.576	137.422	30.91	36.0194	209.486	173.441	77	78
68	S	W	72.3684	72.9871	216.914	147.796	82.8218	54.7003	299.736	202.497	90	88
68	S	Y	74.0546	76.5772	210.229	154.367	73.655	47.2166	283.884	201.583	83	79
69	L	A	84.6432	86.8815	241.234	166.715	43.7669	25.1728	285	191.888	82	81
69	L	C	84.9066	83.8251	267.773	198.021	47.6006	38.21	315.373	236.231	82	78
69	L	D	86.3489	87.2488	331.595	241.614	52.4228	35.3114	384.017	276.925	83	81
69	L	E	83.0316	84.0521	267.632	186.635	54.6936	35.4116	322.326	222.046	90	90
69	L	F	81.991	86.0889	233.485	168.885	51.284	27.29	284.769	196.175	80	84
69	L	G	81.8728	85.9224	275.715	209.448	61.0452	34.3162	336.76	243.765	102	97
69	L	H	81.4354	82.8988	231.862	156.183	52.8569	32.2191	284.719	188.402	89	88
69	L	I	82.1282	85.2302	294.093	210.492	63.9973	36.4769	358.09	246.969	100	95
69	L	K	77.112	82.6443	246.082	173.839	73.0406	36.5069	319.122	210.346	99	87
69	L	M	76.5725	79.6564	305.085	219.712	93.3411	56.1129	398.426	275.825	106	103
69	L	N	89.8291	86.8836	302.962	219.127	34.3029	33.0806	337.265	252.208	95	91
69	L	P	81.573	84.7013	279.18	204.396	63.0656	36.9177	342.245	241.313	77	79
69	L	Q	82.5054	83.3777	265.67	198.597	56.3333	39.5926	322.004	238.19	94	94
69	L	R	79.5686	85.0555	259.846	182.859	66.7223	32.1289	326.568	214.988	99	101
69	L	S	79.3205	83.4878	239.198	166.821	62.361	32.9938	301.559	199.815	74	71
69	L	T	84.1109	86.5822	316.962	218.203	59.8764	33.8153	376.839	252.019	98	94
69	L	V	79.9951	83.8881	239.406	164.569	59.8698	31.6079	299.276	196.177	76	75
69	L	W	79.5132	79.5119	277.522	185.406	71.5044	47.7742	349.026	233.181	99	91
69	L	Y	78.7424	80.8334	245.643	177.4	66.3149	42.0638	311.958	219.464	81	84
70	S	A	81.7757	84.3056	455.162	333.656	101.436	62.1139	556.598	395.77	127	126
70	S	C	75.8246	80.3249	347.622	243.318	110.833	59.5993	458.455	302.918	117	116
70	S	D	81.0893	86.8226	293.295	217.344	68.3987	32.9871	361.693	250.331	94	91
70	S	E	78.619	81.7006	285.347	207.928	77.6023	46.572	362.949	254.5	97	90
70	S	F	83.3843	79.7339	222.221	167.832	44.2812	42.6582	266.502	210.491	97	98
70	S	G	78.9638	85.216	318.974	239.263	84.9758	41.5094	403.95	280.772	101	99
70	S	H	80.9193	82.273	332.928	245.129	78.5039	52.8168	411.432	297.945	118	119
70	S	I	78.5749	87.1728	287.932	222.771	78.5106	32.7801	366.442	255.551	100	98
70	S	K	76.681	80.8095	302.798	219.285	92.0821	52.0755	394.88	271.361	103	103
70	S	L	86.764	88.6089	277.879	191.19	42.391	24.5784	320.27	215.769	85	82
70	S	M	76.1817	81.5811	288.774	202.314	90.2855	45.6771	379.059	247.991	100	93
70	S	N	83.2237	83.4062	280.633	189.237	56.5704	37.649	337.203	226.886	98	93
70	S	P	84.7126	85.7809	299.172	199.448	53.989	33.0606	353.161	232.509	91	91
70	S	Q	81.0156	84.4544	362.66	253.41	84.9825	46.6455	447.643	300.055	102	96
70	S	R	79.2487	84.7297	249.48	179.143	65.3264	32.2859	314.806	211.429	92	91
70	S	T	82.3208	84.9748	288.198	212.414	61.8935	37.5589	350.091	249.972	103	101
70	S	V	78.5691	82.1828	326.226	225.198	88.9831	48.8228	415.209	274.021	103	96
70	S	W	76.0671	81.6035	245.055	172.026	77.1013	38.7811	322.157	210.807	103	100
70	S	Y	77.226	86.8181	231.52	158.358	68.2752	24.0441	299.795	182.402	98	90
71	K	A	85.164	87.6018	352.607	252	61.4259	35.6654	414.033	287.666	108	102
71	K	C	78.2843	83.4499	408.23	280.528	113.241	55.6353	521.471	336.163	104	97
71	K	D	81.7365	83.7504	152.981	110.137	34.1827	21.3692	187.164	131.506	57	57
71	K	E	78.3868	80.5985	219.098	167.973	60.4107	40.4341	279.509	208.407	81	80
71	K	F	85.729	80.5155	212.764	153.148	35.4183	37.0613	248.183	190.209	80	76
71	K	G	81.8386	85.2487	322.664	235.216	71.6046	40.7013	394.269	275.917	100	97
71	K	H	75.6984	78.6186	229.432	165.288	73.655	44.9524	303.087	210.241	82	79
71	K	I	80.5364	86.4705	145.752	104.049	35.2246	16.2798	180.977	120.329	74	65
71	K	L	77.1838	81.7545	213.782	155.411	63.1958	34.6836	276.978	190.094	97	93
71	K	M	83.3152	83.9507	199.606	144.007	39.9733	27.5305	239.579	171.537	93	88
71	K	N	84.7029	84.0154	337.612	242.327	60.9718	46.1045	398.584	288.432	99	101
71	K	P	78.9937	80.5141	247.994	185.781	65.9476	44.9624	313.942	230.743	89	88
71	K	Q	79.3304	84.6295	326.524	232.888	85.076	42.2975	411.6	275.186	89	93
71	K	R	79.1609	81.6791	287.478	222.563	75.6787	49.9215	363.157	272.485	104	99
71	K	S	87.7859	88.6896	184.044	131.664	25.6069	16.7908	209.651	148.455	80	77
71	K	T	81.8894	90.553	269.758	193.597	59.6594	20.197	329.418	213.794	92	85
71	K	V	79.3437	82.6203	300.698	208.124	78.2835	43.7803	378.982	251.904	95	88
71	K	W	74.8083	78.4534	322.164	228.169	108.489	62.6649	430.653	290.834	107	104
71	K	Y	76.6449	79.9497	255.951	186.237	77.993	46.7056	333.944	232.942	91	92
72	Q	A	79.1683	80.3297	193.693	156.452	50.9668	38.3102	244.66	194.762	75	71
72	Q	C	75.5169	80.2455	249.228	175.02	80.8015	43.0857	330.03	218.106	90	91
72	Q	D	82.6439	87.076	183.517	133.919	38.5407	19.8764	222.058	153.795	72	70
72	Q	E	84.1215	90.5056	223.554	169.131	42.1974	17.7425	265.752	186.873	71	74
72	Q	F	78.3505	76.5724	163.639	119.737	45.2162	36.6338	208.856	156.37	79	83
72	Q	G	77.8065	80.6521	259.884	193.886	74.1292	46.5119	334.013	240.398	107	104
72	Q	H	80.8944	83.0092	259.346	197.641	61.2523	40.4542	320.598	238.095	93	91
72	Q	I	76.4626	79.199	259.451	189.477	79.8664	49.7646	339.317	239.241	84	88
72	Q	K	85.5409	84.3711	206.79	153.542	34.9541	28.4421	241.745	181.984	72	71
72	Q	L	83.3774	85.0246	215.326	150.165	42.9287	26.4485	258.255	176.613	78	74
72	Q	M	82.5016	85.101	198.448	149.124	42.0905	26.1079	240.538	175.232	79	76
72	Q	N	81.2924	86.4293	255.284	173.613	58.7477	27.26	314.032	200.873	91	89
72	Q	P	74.5648	76.8232	241.739	173.21	82.4612	52.2558	324.201	225.466	91	84
72	Q	R	72.6737	79.557	180.351	130.804	67.8143	33.6116	248.165	164.416	71	72
72	Q	S	84.034	85.7547	164.411	126.006	31.2373	20.9317	195.649	146.938	60	64
72	Q	T	84.3255	80.7217	245.877	173.248	45.7038	41.3758	291.581	214.624	97	97
72	Q	V	78.7397	79.1606	235.76	172.037	63.6567	45.2897	299.416	217.327	87	91
72	Q	W	77.7158	78.0844	225.543	166.482	64.6719	46.7257	290.215	213.207	102	102
72	Q	Y	74.1217	80.5602	193.29	145.849	67.4837	35.1945	260.774	181.043	75	76
73	P	A	82.7527	85.5654	286.487	195.027	59.7095	32.9003	346.197	227.927	102	100
73	P	C	83.4465	83.5206	261.705	186.395	51.9152	36.7774	313.62	223.172	87	85
73	P	D	80.5347	87.477	223.247	180.482	53.9589	25.8374	277.206	206.32	89	88
73	P	E	88.0557	88.5234	319.705	216.835	43.3662	28.1115	363.071	244.946	103	96
73	P	F	73.4514	81.6934	271.881	180.93	98.2701	40.5443	370.151	221.474	84	81
73	P	G	77.5094	88.7381	240.994	178.245	69.9282	22.6215	310.922	200.867	88	92
73	P	H	77.4809	81.2083	242.117	174.043	70.369	40.2738	312.486	214.317	86	85
73	P	I	81.6524	83.8488	322.436	225.309	72.4528	43.3996	394.889	268.708	107	100
73	P	K	77.4968	82.82	227.87	159.054	66.168	32.9938	294.038	192.048	97	100
73	P	L	87.1912	85.3764	315.953	225.361	46.4151	38.6008	362.369	263.962	107	103
73	P	M	77.7435	78.0281	233.953	160.124	66.9761	45.0893	300.929	205.214	83	80
73	P	N	83.2739	81.539	356.131	247.354	71.5311	56.0027	427.662	303.356	103	105
73	P	Q	83.7996	86.6212	304.558	228.256	58.8779	35.2546	363.436	263.511	121	117
73	P	R	80.9186	86.6734	279.89	204.334	66.001	31.4176	345.891	235.752	107	96
73	P	S	82.769	87.2149	289.172	202.974	60.2004	29.7545	349.372	232.729	97	96
73	P	T	80.8416	84.2141	314.857	227.572	74.6168	42.6582	389.474	270.23	111	102
73	P	V	84.5552	86.4783	308.974	220.923	56.4368	34.5433	365.41	255.466	98	94
73	P	W	74.4428	76.6404	284.072	209.092	97.5254	63.7302	381.597	272.822	126	124
73	P	Y	81.0454	82.5669	209.598	141.208	49.0199	29.8147	258.617	171.023	86	87
74	T	A	84.7673	87.061	345.543	259.661	62.0938	38.5907	407.636	298.252	102	99
74	T	C	83.7213	88.4294	359.28	258.872	69.8581	33.8721	429.138	292.744	111	111
74	T	D	86.4895	87.3729	315.348	221.344	49.2603	31.9886	364.608	253.332	101	97
74	T	E	87.3607	88.4215	269.919	188.412	39.0516	24.6719	308.971	213.084	89	89
74	T	F	81.1709	81.6721	303.918	222.414	70.4992	49.9115	374.417	272.325	108	108
74	T	G	83.8145	89.6211	285.592	188.5	55.1511	21.83	340.743	210.33	92	79
74	T	H	76.1849	81.157	406.124	293.803	126.953	68.2151	533.077	362.018	123	122
74	T	I	79.0558	85.0624	297.681	221.01	78.8646	38.8111	376.545	259.822	103	97
74	T	K	73.3392	83.5168	283.855	200.404	103.189	39.5525	387.045	239.957	99	100
74	T	L	71.9102	80.7716	297.353	226.999	116.153	54.0391	413.506	281.038	97	96
74	T	M	76.5795	79.5178	354.438	260.319	108.399	67.0529	462.836	327.372	108	108
74	T	N	81.2194	88.1749	307.874	218.431	71.1905	29.2937	379.065	247.725	100	97
74	T	P	79.4741	80.3437	459.197	323.419	118.597	79.125	577.794	402.544	123	121
74	T	Q	67.7765	78.4477	292.224	209.337	138.935	57.5121	431.159	266.849	104	101
74	T	R	82.9947	81.7191	262.761	179.465	53.8387	40.1469	316.6	219.612	88	83
74	T	S	85.5737	83.4242	355.017	247.468	59.8497	49.1701	414.866	296.638	106	102
74	T	V	80.9859	80.0277	248.515	173.418	58.347	43.2793	306.862	216.697	90	88
74	T	W	75.4668	83.9471	201.629	149.487	65.5468	28.5857	267.176	178.072	78	75
74	T	Y	74.7353	79.5236	344.183	258.31	116.353	66.5119	460.536	324.822	105	105
75	S	A	79.7524	83.1037	236.134	183.5	59.9499	37.3084	296.084	220.808	92	89
75	S	C	85.3638	90.7658	338.314	236.73	58.0063	24.0842	396.321	260.815	100	97
75	S	D	83.1753	86.1903	282.057	201.588	57.0546	32.2992	339.112	233.888	87	83
75	S	E	88.1952	87.4474	312.915	226.362	41.8834	32.4929	354.799	258.854	102	94
75	S	F	81.7118	86.6635	279.943	194.132	62.6549	29.8748	342.598	224.007	100	100
75	S	G	83.4361	86.9148	266.1	206.22	52.8268	31.0469	318.927	237.267	77	80
75	S	H	78.5671	81.0741	412.748	302.26	112.596	70.5593	525.344	372.819	138	139
75	S	I	84.8683	84.8951	329.945	244.485	58.8278	43.4997	388.773	287.985	100	96
75	S	K	80.2902	87.7873	305.102	208.168	74.8973	28.9598	379.999	237.127	89	84
75	S	L	82.4569	84.3829	341.332	236.736	72.6198	43.8137	413.952	280.55	109	100
75	S	M	83.578	85.7109	328.834	235.847	64.6118	39.3187	393.446	275.166	109	102
75	S	N	87.8995	87.4485	291.461	216.449	40.1236	31.067	331.585	247.516	109	102
75	S	P	76.9807	83.4079	306.488	218.572	91.648	43.4797	398.136	262.051	111	107
75	S	Q	80.3459	83.9564	330.343	234.695	80.8081	44.8489	411.151	279.544	99	98
75	S	R	78.6342	88.664	235.73	163.09	64.0507	20.8516	299.781	183.941	79	80
75	S	T	86.7576	86.7973	319.12	238.029	48.7093	36.2064	367.83	274.235	99	94
75	S	V	85.7214	85.2137	341.905	237.526	56.9511	41.2156	398.856	278.741	110	105
75	S	W	77.5594	82.3669	264.539	193.272	76.5403	41.3758	341.079	234.648	81	80
75	S	Y	79.987	82.5814	313.12	221.431	78.3436	46.7056	391.464	268.137	123	111
76	Q	A	82.4739	87.4815	241.158	172.505	51.2473	24.6853	292.405	197.19	79	80
76	Q	C	85.3116	89.3725	221.695	154.627	38.17	18.387	259.865	173.014	73	71
76	Q	D	80.8145	88.1526	210.536	152.516	49.9816	20.4976	260.518	173.014	73	70
76	Q	E	83.8557	85.8761	165.789	122.558	31.9185	20.157	197.707	142.715	55	51
76	Q	F	81.7093	85.526	294.335	214.612	65.8874	36.3199	360.223	250.932	92	90
76	Q	G	84.5387	85.5248	99.5135	73.0034	18.2	12.356	117.713	85.3594	35	35
76	Q	H	80.9469	86.8126	296.663	211.835	69.828	32.179	366.491	244.014	94	98
76	Q	I	81.3522	87.7067	249.328	167.827	57.1514	23.5231	306.479	191.35	84	78
76	Q	K	81.1632	86.4803	169.473	116.12	39.3321	18.1533	208.805	134.273	73	69
76	Q	L	78.2087	84.1968	234.432	166.534	65.3197	31.2573	299.752	197.791	79	73
76	Q	M	83.3147	87.6469	174.453	122.023	34.9374	17.1982	209.39	139.221	63	61
76	Q	N	84.567	87.3163	332.402	240.283	60.6612	34.904	393.063	275.187	96	94
76	Q	P	85.6842	86.5835	229.177	151.095	38.2902	23.4129	267.468	174.508	70	71
76	Q	R	72.0474	82.3661	85.1356	61.7222	33.0306	13.2142	118.166	74.9364	41	37
76	Q	S	89.5356	89.4768	241.158	178.149	28.185	20.9517	269.343	199.1	73	71
76	Q	T	83.4957	90.9286	385.293	259.422	76.1596	25.8808	461.453	285.302	111	109
76	Q	V	81.0586	87.2719	116.386	77.027	27.1965	11.2339	143.582	88.2609	48	47
76	Q	W	75.2462	79.6179	143.498	104.958	47.2065	26.8693	190.705	131.827	54	53
76	Q	Y	86.4961	82.2832	310.392	236.134	48.4588	50.8432	358.851	286.977	102	99
77	S	A	84.4339	86.6143	282.469	205.238	52.0755	31.7181	334.545	236.956	96	91
77	S	C	82.7352	81.1901	241.871	177.728	50.4725	41.1755	292.344	218.903	89	85
77	S	D	88.0268	90.9492	289.61	208.694	39.3922	20.7681	329.002	229.462	85	82
77	S	E	86.9018	89.5348	327.822	231.993	49.4106	27.1164	377.233	259.11	97	92
77	S	F	79.0276	83.6722	343.911	238.625	91.2673	46.5654	435.178	285.191	105	104
77	S	G	89.6834	89.9447	246.292	167.131	28.3319	18.6843	274.624	185.815	95	89
77	S	H	85.0542	84.1509	346.981	237.292	60.9718	44.6919	407.953	281.984	108	100
77	S	I	85.4062	89.6497	243.371	172.42	41.5862	19.9065	284.957	192.327	80	80
77	S	K	78.1578	82.8334	307.342	213.314	85.8908	44.2077	393.233	257.522	91	88
77	S	L	83.4232	90.52	318.068	241.193	63.2025	25.2596	381.27	266.452	106	102
77	S	M	77.4364	84.8126	350.309	261.158	102.074	46.7657	452.383	307.924	114	112
77	S	N	87.2324	87.169	293.233	201.597	42.9187	29.6744	336.152	231.272	93	93
77	S	P	83.6867	87.9313	432.634	313.138	84.3346	42.9788	516.969	356.116	104	104
77	S	Q	86.7875	84.9506	319.863	236.122	48.6959	41.83	368.559	277.952	97	94
77	S	R	86.2733	88.2603	269.58	175.143	42.892	23.296	312.472	198.439	95	88
77	S	T	85.377	86.0077	294.452	210.975	50.4325	34.3229	344.885	245.298	87	90
77	S	V	77.7287	82.9909	256.48	182.003	73.488	37.3017	329.968	219.304	95	93
77	S	W	83.8026	83.8473	210.08	154.349	40.6044	29.7345	250.685	184.084	82	75
77	S	Y	85.9416	82.0254	165.481	129.199	27.0696	28.3119	192.551	157.511	66	64
78	R	A	86.9962	91.4942	594.987	420.71	88.9364	39.1117	683.923	459.822	141	139
78	R	C	83.2531	87.8329	239.257	178.272	48.1282	24.6953	287.385	202.967	78	78
78	R	D	87.7903	89.9149	367.374	265.638	51.0937	29.7946	418.468	295.433	103	103
78	R	E	80.4276	83.6945	488.579	351.426	118.898	68.4655	607.477	419.891	107	105
78	R	F	80.6884	81.896	166.487	119.824	39.8464	26.4886	206.334	146.313	39	39
78	R	G	86.5517	90.1481	331.542	232.02	51.5144	25.3565	383.056	257.376	89	88
78	R	H	87.2448	86.0346	485.637	353.832	71.0002	57.4353	556.637	411.268	133	129
78	R	I	82.188	89.3246	341.923	227.338	74.1025	27.1698	416.025	254.508	86	89
78	R	K	79.7728	84.891	422.687	297.131	107.176	52.8836	529.863	350.015	109	108
78	R	L	83.1385	84.0293	380.211	269.618	77.1114	51.2439	457.322	320.862	103	99
78	R	M	82.5231	84.1847	353.496	255.439	74.8639	47.988	428.36	303.427	92	91
78	R	N	87.7101	89.2023	440.383	307.605	61.7065	37.2349	502.09	344.84	123	117
78	R	P	80.1516	86.3315	371.184	286.075	91.9185	45.293	463.103	331.368	105	98
78	R	Q	82.5903	87.0391	436.626	316.611	92.0387	47.1464	528.665	363.758	125	125
78	R	S	86.9099	88.2015	483.102	360.763	72.7634	48.2585	555.865	409.021	118	113
78	R	T	86.9105	87.8084	387.808	274.914	58.4071	38.17	446.215	313.084	107	103
78	R	V	80.7494	84.4461	361.795	279.721	86.2514	51.5211	448.046	331.242	97	96
78	R	W	81.6214	85.2002	370.535	272.627	83.4329	47.3568	453.968	319.984	122	119
78	R	Y	83.5102	85.7437	439.547	304.851	86.7924	50.6863	526.339	355.537	105	103
79	G	A	80.8745	87.1952	471.171	348.402	111.424	51.1638	582.596	399.566	122	115
79	G	C	80.8829	87.9661	453.03	316.366	107.076	43.2793	560.106	359.645	112	110
79	G	D	84.3416	85.8337	349.622	247.661	64.909	40.8749	414.531	288.536	101	98
79	G	E	80.5087	83.6921	277.417	201.852	67.1631	39.3321	344.58	241.184	88	86
79	G	F	80.8297	79.1394	333.624	236.099	79.125	62.2341	412.749	298.333	96	93
79	G	H	80.8895	84.1453	481.467	336.285	113.749	63.3628	595.216	399.648	136	131
79	G	I	79.3727	82.5736	396.989	281.347	103.169	59.3755	500.159	340.722	115	110
79	G	K	73.9095	83.5968	340.051	246.555	120.04	48.3787	460.091	294.934	108	105
79	G	L	78.1229	85.4864	487.084	351.753	136.4	59.7195	623.484	411.473	118	118
79	G	M	81.9622	83.7044	371.465	263.942	81.7499	51.3842	453.215	315.326	111	104
79	G	N	79.5127	86.3808	479.18	345.162	123.466	54.4198	602.647	399.582	131	126
79	G	P	82.9786	86.7111	286.294	214.373	58.7277	32.8536	345.022	247.226	66	63
79	G	Q	79.2159	84.8399	543.087	376.535	142.491	67.2833	685.578	443.819	125	126
79	G	R	79.8809	81.4867	303.418	234.415	76.4201	53.2576	379.838	287.672	92	94
79	G	S	80.8385	85.1584	367.456	262.24	87.0997	45.7038	454.556	307.944	119	116
79	G	T	81.1769	83.4892	464.776	337.694	107.771	66.7824	572.547	404.477	105	101
79	G	V	83.3874	84.5956	381.983	270.136	76.0995	49.1902	458.082	319.326	127	120
79	G	W	75.5791	78.115	254.679	177.079	82.2909	49.6109	336.97	226.689	90	89
79	G	Y	76.4889	83.6787	335.858	249.491	103.236	48.6625	439.094	298.154	99	97
80	D	A	77.5175	86.3902	250.363	175.517	72.6131	27.6507	322.976	203.168	76	76
80	D	C	74.747	78.8396	263.828	187.491	89.1334	50.3222	352.962	237.814	102	96
80	D	E	79.7101	85.0169	316.436	232.046	80.5477	40.895	396.984	272.941	99	90
80	D	F	75.5835	78.3679	325.542	238.38	105.163	65.8006	430.704	304.18	119	120
80	D	G	78.1254	84.1656	358.666	270.943	100.424	50.9734	459.09	321.916	86	88
80	D	H	76.0147	81.3813	309.313	223.677	97.5989	51.1738	406.912	274.851	119	114
80	D	I	79.469	79.2653	332.831	231.362	85.9876	60.5209	418.819	291.883	92	93
80	D	K	78.0742	80.1425	325.024	243.608	91.2773	60.3607	416.301	303.969	93	94
80	D	L	73.2172	80.4193	347.695	240.403	127.186	58.534	474.881	298.937	93	96
80	D	M	79.9708	80.6916	305.71	220.057	76.567	52.6565	382.277	272.714	100	98
80	D	N	81.73	86.0361	326.086	226.905	72.8936	36.8275	398.979	263.733	107	101
80	D	P	75.473	78.8209	250.477	175.947	81.3992	47.2767	331.876	223.224	76	76
80	D	Q	77.7006	83.5521	324.752	239.494	93.2009	47.1464	417.953	286.64	94	98
80	D	R	78.1702	77.3385	423.441	306.301	118.25	89.7512	541.691	396.052	109	110
80	D	S	79.7055	85.353	331.77	255.065	84.4749	43.7702	416.245	298.835	89	91
80	D	T	80.2174	85.3615	308.62	225.853	76.1095	38.731	384.729	264.584	89	85
80	D	V	76.108	78.5593	319.647	234.818	100.344	64.0875	419.991	298.906	96	92
80	D	W	79.9029	78.4218	324.068	225.595	81.5094	62.0738	405.577	287.669	102	99
80	D	Y	77.0229	74.3494	229.239	166.043	68.3854	57.285	297.624	223.328	84	88
81	P	A	83.316	86.2413	470.926	325.033	94.3029	51.8551	565.229	376.888	135	121
81	P	C	80.3064	83.0996	274.668	204.004	67.3568	41.4894	342.025	245.493	80	81
81	P	D	87.42	85.9895	447.185	326.46	64.3513	53.1908	511.536	379.651	120	123
81	P	E	82.456	85.4181	452.258	342.49	96.2264	58.4672	548.485	400.957	136	129
81	P	F	80.3691	85.0439	392.679	274.2	95.9158	48.2217	488.595	322.422	115	109
81	P	G	77.5728	83.0383	439.529	328.741	127.073	67.1498	566.602	395.89	113	108
81	P	H	75.541	82.4943	503.48	368.386	163.019	78.1733	666.499	446.559	122	118
81	P	I	83.6499	85.4064	438.611	323.173	85.7305	55.2212	524.342	378.394	131	125
81	P	K	82.5969	86.6851	347.578	265.784	73.2343	40.8248	420.812	306.609	95	99
81	P	L	81.3839	84.9667	369.123	268.732	84.4348	47.5472	453.557	316.279	103	97
81	P	M	78.8614	82.8209	342.209	249.705	91.7282	51.7949	433.937	301.5	107	107
81	P	N	79.4207	86.4292	454.372	334.846	117.736	52.5764	572.108	387.423	132	125
81	P	Q	83.758	85.5992	429.634	294.295	83.3127	49.5108	512.947	343.805	119	117
81	P	R	81.9949	85.1555	259.416	199.308	56.9644	34.7437	316.38	234.051	93	90
81	P	S	80.5768	84.4716	367.123	272.381	88.4956	50.0718	455.618	322.453	97	97
81	P	T	80.1817	87.7835	455.021	328.7	112.466	45.7439	567.488	374.444	123	128
81	P	V	89.0638	87.4543	328.559	232.836	40.344	33.4012	368.903	266.237	105	102
81	P	W	75.8531	80.7706	137.182	103.435	43.6701	24.6251	180.852	128.06	53	51
81	P	Y	77.0266	82.6759	336.238	240.169	100.284	50.3256	436.522	290.495	102	97
82	T	A	86.0597	86.8886	366.386	252.021	59.3488	38.0297	425.734	290.05	110	110
82	T	C	82.5051	87.3215	371.889	267.03	78.8579	38.7711	450.747	305.801	132	119
82	T	D	83.0647	86.524	378.562	281.61	77.1815	43.8604	455.743	325.47	119	111
82	T	E	80.4226	85.6548	273.048	193.097	66.4685	32.3393	339.516	225.436	72	69
82	T	F	75.1587	77.1103	361.45	237.327	119.466	70.4491	480.915	307.776	116	112
82	T	G	81.2283	81.2696	369.351	266.551	85.3565	61.4326	454.707	327.983	103	99
82	T	H	80.2677	80.6284	412.938	300.201	101.513	72.1256	514.45	372.327	133	132
82	T	I	79.6288	84.8064	445.179	336.077	113.889	60.2104	559.068	396.288	117	117
82	T	K	82.8046	84.2266	196.158	133.954	40.7347	25.086	236.893	159.04	67	66
82	T	L	77.418	84.4276	245.871	172.072	71.7181	31.7382	317.589	203.811	69	65
82	T	M	86.8624	84.5029	188.781	127.831	28.5523	23.443	217.333	151.274	63	61
82	T	N	87.7787	87.4106	342.656	248.187	47.7075	35.7455	390.364	283.933	113	109
82	T	P	86.9142	85.3466	639.258	460.153	96.2464	79.0048	735.505	539.158	150	152
82	T	Q	81.6263	85.607	269.387	196.758	60.6378	33.0806	330.025	229.838	77	76
82	T	R	79.4985	81.0744	246.193	180.424	63.4897	42.1172	309.683	222.541	70	73
82	T	S	83.5957	87.3642	483.321	366.079	94.8439	52.9471	578.165	419.026	134	133
82	T	V	80.9443	78.4756	239.163	152.118	56.3032	41.7232	295.467	193.841	69	66
82	T	W	71.6135	73.2392	276.3	186.371	109.521	68.0982	385.82	254.47	78	69
82	T	Y	79.5059	85.5176	466.104	338.028	120.147	57.2449	586.251	395.273	153	156
83	G	A	79.1352	81.2742	288.4	204.887	76.0394	47.2065	364.439	252.093	75	72
83	G	C	82.0649	82.3623	346.279	249.819	75.6787	53.4981	421.958	303.317	115	118
83	G	D	84.8713	86.8708	347.894	254.942	62.0137	38.5306	409.907	293.472	107	104
83	G	E	85.8004	88.9313	368.237	274.478	60.9417	34.1626	429.178	308.64	87	94
83	G	F	80.6908	81.8579	289.04	210.466	69.1668	46.6455	358.207	257.112	104	107
83	G	H	80.0332	82.2127	345.227	263.381	86.1279	56.9845	431.355	320.365	109	111
83	G	I	81.0185	84.4716	303.734	231.616	71.1604	42.5781	374.894	274.194	105	109
83	G	K	83.4781	87.2583	312.079	233.04	61.7666	34.029	373.846	267.069	84	86
83	G	L	80.9534	84.7369	410.423	289.815	96.5637	52.2024	506.987	342.017	107	103
83	G	M	76.4367	87.2537	331.571	246.064	102.214	35.9459	433.785	282.01	99	96
83	G	N	84.1678	81.7181	353.754	267.478	66.542	59.8397	420.295	327.317	105	105
83	G	P	81.1333	81.927	269.609	197.553	62.6949	43.5799	332.304	241.133	79	78
83	G	Q	89.5402	86.825	434.81	299.301	50.7931	45.4166	485.603	344.717	118	114
83	G	R	75.5532	86.8588	288.689	202.097	93.4112	30.5761	382.1	232.673	94	91
83	G	S	82.38	84.1168	382.772	266.346	81.8701	50.2922	464.642	316.638	109	101
83	G	T	78.1119	83.4462	404.361	282.961	113.308	56.1329	517.669	339.094	108	103
83	G	V	83.8143	85.0549	381.614	253.608	73.6951	44.5617	455.31	298.17	133	132
83	G	W	80.0819	83.1451	339.797	242.31	84.5149	49.12	424.312	291.43	101	98
83	G	Y	80.2495	78.754	288.119	215.387	70.91	58.1065	359.029	273.494	92	85
84	P	A	82.5729	86.0276	277.741	195.965	58.6175	31.8283	336.359	227.794	75	70
84	P	C	85.2083	83.5749	269.627	193.641	46.8058	38.0564	316.433	231.697	75	72
84	P	D	78.9624	81.6768	272.621	203.817	72.6331	45.7238	345.254	249.54	67	65
84	P	E	78.9675	83.1025	363.017	250.196	96.6872	50.8733	459.704	301.069	85	81
84	P	F	76.1716	81.6684	331.378	233.04	103.663	52.3092	435.042	285.349	74	76
84	P	G	83.4481	86.8325	323.828	229.952	64.2311	34.8706	388.059	264.823	88	82
84	P	H	84.8317	83.3927	379.658	260.135	67.8844	51.805	447.543	311.94	104	104
84	P	I	75.5619	84.4487	260.492	179.675	84.2478	33.0873	344.74	212.762	83	82
84	P	K	89.6291	86.0918	374.035	276.706	43.2793	44.7019	417.314	321.408	100	92
84	P	L	78.7466	83.96	249.591	170.955	67.3635	32.6599	316.954	203.615	84	84
84	P	M	86.5796	80.9988	303.383	223.782	47.0262	52.4962	350.409	276.279	98	98
84	P	N	84.0462	85.6063	399.738	295.02	75.8791	49.6043	475.617	344.624	83	83
84	P	Q	80.1371	82.2888	302.821	225.379	75.0576	48.5089	377.879	273.888	95	103
84	P	R	75.1108	87.4825	404.826	295.47	134.146	42.2775	538.972	337.748	106	101
84	P	S	80.4047	80.5543	319.354	234.841	77.8293	56.6906	397.184	291.532	104	107
84	P	T	83.8484	82.4978	369.833	270.583	71.2406	57.4052	441.074	327.988	96	91
84	P	V	83.169	85.171	281.583	204.501	56.9845	35.6053	338.568	240.106	82	80
84	P	W	80.4843	79.2052	353.876	252.459	85.8073	66.2815	439.684	318.741	108	104
84	P	Y	83.2071	87.598	372.596	268.282	75.1979	37.983	447.794	306.265	101	91
85	K	A	79.455	83.3716	265.556	183.541	68.6659	36.6071	334.222	220.148	80	76
85	K	C	77.0326	78.7841	286.622	200.869	85.4567	54.0925	372.078	254.962	82	77
85	K	D	80.4685	88.3606	309.357	224.133	75.0876	29.5241	384.444	253.657	83	84
85	K	E	19.6934	22.4511	79.8108	60.8274	325.457	210.105	405.267	270.933	82	82
85	K	F	76.9396	80.7294	266.937	184.722	80.0067	44.0942	346.943	228.816	84	79
85	K	G	80.2309	85.5544	241.485	171.95	59.5024	29.0332	300.987	200.983	73	67
85	K	H	75.0325	84.7174	373.842	266.627	124.398	48.0982	498.24	314.725	102	101
85	K	I	77.0621	82.1636	320.05	234.441	95.2646	50.8933	415.315	285.334	99	95
85	K	L	76.9845	80.3375	361.008	268.89	107.928	65.8106	468.936	334.7	103	101
85	K	M	82.9897	83.7785	328.261	225.8	67.2833	43.7201	395.544	269.52	85	85
85	K	N	81.1673	83.7249	301.558	226.046	69.9683	43.9406	371.526	269.986	93	88
85	K	P	80.0497	81.329	336.326	237.222	83.8203	54.4598	420.146	291.682	101	102
85	K	Q	82.8417	85.3072	355.999	253.608	73.7352	43.6801	429.734	297.289	93	92
85	K	R	77.5723	85.3315	306.699	218.142	88.6726	37.4987	395.371	255.641	87	89
85	K	S	80.2957	85.1716	377.877	275.864	92.73	48.028	470.607	323.892	104	100
85	K	T	76.4488	83.7584	290.373	209.036	89.454	40.5343	379.827	249.57	82	83
85	K	V	82.4883	86.747	317.173	221.774	67.3334	33.8821	384.506	255.656	97	95
85	K	W	71.4786	74.6412	282.408	190.965	112.687	64.8789	395.095	255.844	90	91
85	K	Y	79.4725	85.1842	282.092	198.378	72.8636	34.5033	354.956	232.881	84	84
86	E	A	88.3569	93.5922	114.953	97.1625	15.1478	6.65219	130.101	103.815	27	28
86	E	C	77.9052	79.6901	204.904	158.861	58.1132	40.4876	263.018	199.349	77	79
86	E	D	85.6309	85.971	239.888	167.727	40.2538	27.3702	280.142	195.097	93	90
86	E	F	77.8069	83.0057	240.994	168.166	68.7393	34.4298	309.733	202.596	92	93
86	E	G	75.6577	76.907	204.545	149.472	65.8106	44.8823	270.355	194.354	70	68
86	E	H	80.9871	83.4905	295.347	202.606	69.3371	40.0634	364.684	242.669	90	86
86	E	I	87.0224	80.6064	252.234	180.605	37.6156	43.453	289.85	224.058	76	74
86	E	K	83.2466	86.5325	327.954	243.836	66.001	37.9496	393.955	281.786	108	109
86	E	L	76.2477	81.3293	318.407	224.192	99.1885	51.4677	417.595	275.66	102	97
86	E	M	83.9291	87.2988	215.384	158.972	41.2423	23.1291	256.627	182.101	70	71
86	E	N	85.7816	86.8657	293.628	215.405	48.6692	32.5697	342.297	247.975	92	90
86	E	P	78.5176	84.5421	357.894	258.182	97.9195	47.2065	455.814	305.388	97	97
86	E	Q	85.6556	86.7806	260.53	191.316	43.63	29.1434	304.16	220.459	73	74
86	E	R	79.166	88.0465	371.877	279.282	97.8661	37.9162	469.743	317.198	101	97
86	E	S	78.4001	83.7295	233.064	173.295	64.211	33.6751	297.275	206.97	72	73
86	E	T	76.3884	80.2417	338.7	247.263	104.692	60.8849	443.392	308.148	96	95
86	E	V	76.0429	83.1412	261.679	195.009	82.4411	39.5425	344.12	234.552	98	92
86	E	W	76.3493	77.6666	298.014	211.548	92.3159	60.8315	390.33	272.379	108	105
86	E	Y	77.3848	83.7914	240.652	173.447	70.3289	33.5515	310.981	206.998	92	84

## Sheet: Column definitions
Column	Description
Position	Tat amino acid position
Ref AA	reference amino acid for Tat position in row
Alt AA	mutant amino acid for Tat position in row
%GFP+ rpm	Tat Transcriptional activity as a percentage of wild type activity in reads per million (rpm) to normalize among samples
GFP+ rpm	Tat Transcriptional activity GFP positive pool reads in reads per million (rpm) to normalize among samples
GFP- rpm	Tat Transcriptional activity GFP negative pool reads in reads per million (rpm) to normalize among samples
Total rpm	Tat Transcriptional activity total reads from GFP positive and negative pools in reads per million (rpm) to normalize among samples
Barcode #	Number of barcodes for each mutation
