# Supplementary material for: GigaAssay – a high-throughput assay system for molecular functions and cell processes
Source: Research Square preprint supplement (doi:10.21203/rs.3.rs-708936/v1), 2021-07-12
Supplement: Supplementary file 6 [file 13c4a566d276d9ed243b305e.xlsx]

## Sheet: single mutant filtering
Gene Name	Ref aa	Position	Mutant aa	Activity (% of wt)	Activity Boolean	Std Dev	Activity measurment	Tat isoform	Assay	Pubmed ID
TatE2D	E	2	D	65	ON	NULL	estimated	HIV1-C Tat71	HIV1-LTR-luc	23487450
TatP3I	P	3	I	112.5	ON	NULL	estimated	HIV1-C Tat71	HIV1-LTR-luc	23487450
TatV4A	V	4	A	99	ON	NULL	reported	HIV1-tat-86	LTR1-CAT	3194421
TatV4I	V	4	I	62	ON	NULL	estimated	HIV1-C Tat71	HIV1-LTR-luc	23487450
TatGly5	D	5	G	23	OFF	NULL	reported	HIV1 (two exon)	pLTR1-CAT	2562188
TatLys5	D	5	K	11	OFF	NULL	reported	HIV1 (two exon)	pLTR1-CAT	2562188
TatGlu5	D	5	E	53	ON	NULL	reported	HIV1 (two exon)	pLTR1-CAT	2562188
TatAla5	D	5	A	18	OFF	NULL	reported	HIV1 (two exon)	pLTR1-CAT	2562188
TatD5N	D	5	N	85.4	ON	NULL	estimated	HIV1-tat-86	pLTR1-SEAP	2219707
TatD5N	D	5	N	120	ON	NULL	estimated	HIV1-tat-101	pLTR1-CAT	8764071
6-A-Tat(1-86)	P	6	A	15	OFF	NULL	estimated	HIV1-tat-86	HIV1-LTR-CAT	1501886
7-Q-Tat(1-86)	R	7	Q	20	OFF	NULL	estimated	HIV1-tat-86	HIV1-LTR-CAT	1501886
TatR7K	R	7	K	90	ON	NULL	estimated	HIV1-B Tat101	HIV1-LTR-GFP	22253435
TatAla9	E	9	A	88	ON	NULL	reported	HIV1 (two exon)	pLTR1-CAT	2562188
TatAsp9	E	9	D	102	ON	NULL	reported	HIV1 (two exon)	pLTR1-CAT	2562188
TatE9Q	E	9	Q	73.2	ON	NULL	estimated	HIV1-tat-86	pLTR1-SEAP	2219707
TatMet2	W	11	M	7	OFF	NULL	reported	HIV1-tat-72	pLTR1-CAT	3181132
TatK12N	K	12	N	78.2	ON	NULL	reported	HIV1-tat-86	LTR1-CAT	3194421
TatK12A	K	12	A	228.6	ON	NULL	estimated	HIV1-tat-101	pLTR1-luc	23826228
TatK12R	K	12	R	312.4	ON	NULL	estimated	HIV1-tat-101	pLTR1-luc	23826228
TatK12N	K	12	N	78	ON	NULL	estimated	HIV1-B Tat101	HIV1-LTR-GFP	22253435
14-A-Tat(1-86)	P	14	A	5	OFF	NULL	estimated	HIV1-tat-86	HIV1-LTR-CAT	1501886
TatG15E	G	15	E	80	ON	NULL	estimated	HIV1-tat-72	pLTR1-CAT	8764071
TatS16G	S	16	G	120	ON	NULL	estimated	HIV1-tat-72	pLTR1-CAT	8764071
TatS16A	S	16	A	75	ON	NULL	estimated	HIV1-tat-101	pHIV1-LTR-lacz	17083724
TatPro18	P	18	A	10	OFF	NULL	reported	HIV1-tat-86	pLTR1-CAT	2181156
18-A-Tat(1-86)	P	18	A	35	OFF	NULL	estimated	HIV1-tat-86	HIV1-LTR-CAT	1501886
TatK19A	K	19	A	392.9	ON	NULL	estimated	HIV1-tat-101	pLTR1-luc	23826228
TatK19Q	K	19	Q	478.6	ON	NULL	estimated	HIV1-tat-101	pLTR1-luc	23826228
TatK19R	K	19	R	314.3	ON	NULL	estimated	HIV1-tat-101	pLTR1-luc	23826228
19-Q-Tat(1-86)	K	19	Q	66	ON	NULL	estimated	HIV1-tat-86	HIV1-LTR-CAT	1501886
TatK19A	K	19	A	111	ON	NULL	estimated	HIV1-Tat72C	LTR-B-pGL3	15994812
TatK19R	K	19	R	110	ON	NULL	estimated	HIV1-B Tat101	HIV1-LTR-GFP	22253435
Tat22/37	C	22	G	42.2	OFF	NULL	reported	HIV1-tat-86	pLTR1-CAT	8646555
TatCys22	C	22	G	17	OFF	2	reported	HIV1 (two exon)	pLTR1-CAT	9300036
Tat22	C	22	G	1	OFF	NULL	reported	HIV1-tat-67SF2	pTAR1-CAT	2542902
TatCys22	C	22	G	4	OFF	NULL	reported	HIV1-tat-86	pLTR1-CAT	2181156
Tat∆Cys1	C	22	S	2	OFF	NULL	reported	HIV1-tat-72	pLTR1-CAT	3181132
Tat22	C	22	G	10.8	OFF	0.57	reported	HIV1-tat-86	pLTR1-CAT	8106862
TatT23A	T	23	A	76.2	ON	9.97	estimated	HIV1-tat-86	pLTR1-luc	25653431
TatT23N	T	23	N	97.8	ON	NULL	estimated	HIV1-tat-86	pLTR1-luc	25653431
TatT23D	T	23	D	48.6	OFF	23.3	estimated	HIV1-tat-86	pLTR1-luc	25653431
TatThr23	T	23	A	171	ON	12	reported	HIV1 (two exon)	pLTR1-CAT	9300036
TatThr23	T	23	A	97	ON	NULL	reported	HIV1-tat-86	pLTR1-CAT	2181156
TatAsn24	N	24	A	188	ON	94	reported	HIV1 (two exon)	pLTR1-CAT	9300036
TatAsn24	N	24	A	109	ON	NULL	reported	HIV1-tat-86	pLTR1-CAT	2181156
TatN24K	N	24	K	81	ON	NULL	estimated	HIV1-B Tat101	HIV1-LTR-GFP	22253435
Gly25-Tat	C	25	G	4.3	OFF	NULL	estimated	HIV1-tat-86	pTAR1-CAT	8337844
TatC25G	C	25	G	3.4	OFF	NULL	reported	HIV1-tat-86	LTR1-CAT	3194421
TatY26F	Y	26	F	93	ON	NULL	estimated	HIV1-tat-86	pLTR1-CAT	9356335
TatY26W	Y	26	W	81	ON	NULL	estimated	HIV1-tat-86	pLTR1-CAT	9356335
TatY26H	Y	26	H	48	OFF	NULL	estimated	HIV1-tat-86	pLTR1-CAT	9356335
TatY26A	Y	26	A	5	OFF	NULL	estimated	HIV1-tat-86	pLTR1-CAT	9356335
TatTyr26	Y	26	A	5	OFF	4	reported	HIV1 (two exon)	pLTR1-CAT	9300036
TatY26A	Y	26	A	7	OFF	NULL	reported	HIV1-tat-86	pTAR1-CAT	10074125
TatTyr26	Y	26	A	6	OFF	NULL	reported	HIV1-tat-86	pLTR1-CAT	2181156
TatC27G	C	27	G	2.6	OFF	NULL	reported	HIV1-tat-86	LTR1-CAT	3194421
Tat∆Cys2	C	27	S	5	OFF	NULL	reported	HIV1-tat-72	pLTR1-CAT	3181132
TatC27S	C	27	S	0	OFF	NULL	estimated	HIV1-Tat86	pEGFP-C2	17604883
TatK29A	K	29	A	91.4	ON	NULL	estimated	HIV1-tat-86	pLTR1-luc	10545121
TatK29R	K	29	R	100	ON	NULL	estimated	HIV1-tat-72	pLTR1-luc	11956210
TatK29A	K	29	A	243.9	ON	NULL	estimated	HIV1-tat-101	pLTR1-luc	23826228
TatK29Q	K	29	Q	200	ON	NULL	estimated	HIV1-tat-101	pLTR1-luc	23826228
TatK29R	K	29	R	314.3	ON	NULL	estimated	HIV1-tat-101	pLTR1-luc	23826228
TatK29A	K	29	A	93.8	ON	NULL	estimated	HIV1-Tat72E	LTR-B-pGL3	15994812
TatK29H	K	29	H	79	ON	NULL	estimated	HIV1-B Tat101	HIV1-LTR-GFP	22253435
TatCys30	C	30	G	4	OFF	NULL	reported	HIV1-tat-86	pLTR1-CAT	2181156
TatC30G	C	30	G	4.2	OFF	NULL	reported	HIV1-tat-86	LTR1-CAT	3194421
TatC31S	C	31	S	70	ON	NULL	estimated	HIV1-B Tat101	HIV1-LTR-GFP	22253435
Tat31	C	31	E	1	OFF	NULL	reported	HIV1-tat-67SF2	pTAR1-CAT	2542902
TatM31	C	31	H	15.3	OFF	NULL	reported	HIV1-tat-72	pCAT-autorad	2078407
TatF32W	F	32	W	57	ON	NULL	estimated	HIV1-tat-86	pLTR1-CAT	9356335
TatF32A	F	32	A	3	OFF	NULL	estimated	HIV1-tat-86	pLTR1-CAT	9356335
TatF32L	F	32	L	39	OFF	NULL	estimated	HIV1-tat-86	pLTR1-CAT	9356335
TatF32A	F	32	A	4	OFF	NULL	reported	HIV1-tat-86	pTAR1-CAT	10074125
TatA32V	A	32	V	15	OFF	NULL	reported	HIV1-tat-86	pTAR1-CAT	10074125
TatF32W	F	32	W	74	ON	NULL	reported	HIV1-tat-86	pTAR1-CAT	10074125
TatPhe32	F	32	A	5	OFF	NULL	reported	HIV1-tat-86	pLTR1-CAT	2181156
TatF32Y	F	32	Y	90	ON	NULL	estimated	HIV1-B Tat101	HIV1-LTR-GFP	22253435
TatHis33	H	33	A	25	OFF	13	reported	HIV1 (two exon)	pLTR1-CAT	9300036
TatHis33	H	33	A	3	OFF	NULL	reported	HIV1-tat-86	pLTR1-CAT	2181156
TatM34	C	34	H	2.7	OFF	NULL	reported	HIV1-tat-72	pCAT-autorad	2078407
TatGln35	Q	35	A	18	OFF	13	reported	HIV1 (two exon)	pLTR1-CAT	9300036
TatGln35	Q	35	A	6	OFF	NULL	reported	HIV1-tat-86	pLTR1-CAT	2181156
TatQ35L	Q	35	L	5	OFF	NULL	estimated	HIV1-B Tat101	HIV1-LTR-GFP	22253435
TatQ35L	Q	35	L	1	OFF	NULL	estimated	HIV1-B Tat101	HIV1-LTR-luc	22253435
Tat37	C	37	G	1	ON	NULL	reported	HIV1-tat-67SF2	pTAR1-CAT	2542902
TatC37G	C	37	G	1.2	OFF	NULL	reported	HIV1-tat-86	LTR1-CAT	3194421
TatM37	C	37	H	3.1	OFF	NULL	reported	HIV1-tat-72	pCAT-autorad	2078407
Tat37	C	37	S	51.6	ON	NULL	reported	HIV1-tat-86	pLTR1-CAT	8646555
TatF38W	F	38	W	38	OFF	NULL	estimated	HIV1-tat-86	pLTR1-CAT	9356335
TatF38W	F	38	W	42	OFF	NULL	reported	HIV1-tat-86	pTAR1-CAT	10074125
TatPhe38	F	38	A	3	OFF	NULL	reported	HIV1-tat-86	pLTR1-CAT	2181156
TatT40A	T	40	A	98.2	ON	14.3	estimated	HIV1-tat-86	pLTR1-luc	25653431
TatT40D	T	40	D	40.9	OFF	23.2	estimated	HIV1-tat-86	pLTR1-luc	25653431
TatAla40	T	40	A	106	ON	NULL	reported	HIV1 (two exon)	pLTR1-CAT	2562188
TatLys40	T	40	K	151	ON	NULL	reported	HIV1 (two exon)	pLTR1-CAT	2562188
TatK40A	K	40	A	300	ON	NULL	estimated	HIV1-tat-101	pLTR1-luc	23826228
TatK40Q	K	40	Q	321.4	ON	NULL	estimated	HIV1-tat-101	pLTR1-luc	23826228
TatK40R	K	40	R	214.3	ON	NULL	estimated	HIV1-tat-101	pLTR1-luc	23826228
TatK40A	K	40	A	53.1	ON	NULL	estimated	HIV1-Tat72E	LTR-B-pGL3	15994812
TatT40N	T	40	N	76	ON	NULL	estimated	HIV1-B Tat101	HIV1-LTR-GFP	22253435
TatVT2	K	41	N	96	ON	NULL	estimated	HIV1-C-tat-72	pLTR1-C-luc	28484443
Tat41ala	K	41	A	7	OFF	NULL	estimated	HIV1-tat-72	TAR-hGH	9813666
TatLys41	K	41	A	30	OFF	7	reported	HIV1 (two exon)	pLTR1-CAT	9300036
Tat41	K	41	T	1	ON	NULL	reported	HIV1-tat-67SF2	pTAR1-CAT	2542902
TatK41A	K	41	A	44	OFF	NULL	estimated	HIV1-tat-72	pLTR1-luc	11956210
TatLys41	K	41	A	4	OFF	NULL	reported	HIV1-tat-86	pLTR1-CAT	2181156
TatK41A	K	41	A	7.1	OFF	NULL	estimated	HIV1-tat-101	pLTR1-luc	23826228
TatK41Q	K	41	Q	21.4	OFF	NULL	estimated	HIV1-tat-101	pLTR1-luc	23826228
TatK41R	K	41	R	85.7	ON	NULL	estimated	HIV1-tat-101	pLTR1-luc	23826228
TatK41A	K	41	A	1.8	OFF	NULL	estimated	HIV1-tat-86	pLTR1-SEAP	2219707
TatK41A	K	41	A	30	OFF	NULL	estimated	HIV1-tat-72	pHLGBRA-BS	8388497
TatK41A	K	41	A	5.2	OFF	NULL	estimated	HIV1-Tat72C	LTR-B-pGL3	15994812
TatK41A	K	41	A	3.13	OFF	NULL	estimated	HIV1-Tat72E	LTR-B-pGL3	15994812
TatA42G	A	42	G	108	ON	NULL	estimated	HIV1-B Tat101	HIV1-LTR-GFP	22253435
Tat44	G	44	S	38	OFF	NULL	reported	HIV1-tat-67SF2	pTAR1-CAT	2542902
TatG44D	G	44	D	160	ON	NULL	estimated	HIV1-tat-101	pLTR1-CAT	8764071
TatE59	S	46	F	159	ON	NULL	estimated	HIV1-C-tat-72	pLTR1-C-luc	28484443
TatS46A	S	46	A	113.1	ON	8.9	estimated	HIV1-tat-86	pLTR1-luc	25653431
TatS46D	S	46	D	53.5	ON	14.8	estimated	HIV1-tat-86	pLTR1-luc	25653431
TatAla46	S	46	A	160	ON	NULL	reported	HIV1 (two exon)	pLTR1-CAT	2562188
TatSer46	S	46	A	420	ON	NULL	reported	HIV1-tat-86	pLTR1-CAT	2181156
TatS46A	S	46	A	50	ON	NULL	estimated	HIV1-tat-101	pHIV1-LTR-lacz	17083724
TatY47W	Y	47	W	30	OFF	NULL	estimated	HIV1-tat-86	pLTR1-CAT	9356335
TatY47H2	Y	47	H	36	OFF	NULL	estimated	HIV1-tat-86	pLTR1-CAT	9356335
Tat47H	Y	47	H	32	OFF	NULL	reported	HIV1-tat-67SF2	pTAR1-CAT	2542902
TatY47H2	Y	47	H	43	OFF	NULL	reported	HIV1-tat-86	pTAR1-CAT	10074125
TatY47W	Y	47	W	10	OFF	NULL	estimated	HIV1-tat-86	pTAR1-CAT	10074125
TatR49A	R	49	A	105	ON	NULL	estimated	HIV1-tat-72	pTAR1-CAT	17267505
TatR49T	R	49	T	66.7	ON	NULL	reported	HIV1-tat-86	LTR1-CAT	3194421
TatK50R	K	50	R	80	ON	NULL	estimated	HIV1-tat-72	pLTR1-luc	11956210
TatK50T	K	50	T	85.5	ON	NULL	reported	HIV1-tat-86	LTR1-CAT	3194421
TatK50R	K	50	R	285.7	ON	NULL	estimated	HIV1-tat-101	pLTR1-luc	23826228
TatK51Q	K	51	Q	200	ON	NULL	estimated	HIV1-tat-101	pLTR1-luc	23826228
TatK51R	K	51	R	121.4	ON	NULL	estimated	HIV1-tat-101	pLTR1-luc	23826228
TatK51R	K	51	R	56.5	ON	NULL	estimated	HIV1-tat-101	HIV1-LTR-luc	27235396
TatK51T	K	51	T	87.8	ON	NULL	estimated	HIV1-Tat86	pEGFP-C2	17604883
TatR52K	R	52	K	27	OFF	NULL	estimated	HIV1-tat-72	pTAR1-CAT	17267505
TatR52Q	R	52	Q	82	ON	NULL	estimated	HIV1-tat-101	pLTR1-CAT	8764071
TatR53I	R	53	I	84.4	ON	NULL	reported	HIV1-tat-86	LTR1-CAT	3194421
TatK53A	K	53	A	84.4	ON	NULL	estimated	HIV1-Tat72E	LTR-B-pGL3	15994812
TatQ54N	Q	54	N	77	ON	NULL	reported	HIV1 (two exon)	pHIV1-TAR-CAT	2068104
TatQ54K	Q	54	K	104	ON	NULL	reported	HIV1 (two exon)	pHIV1-TAR-CAT	2068104
TatQ54P	Q	54	P	94	ON	NULL	reported	HIV1 (two exon)	pHIV1-TAR-CAT	2068104
TatR55Q	R	55	Q	64	ON	NULL	reported	HIV1 (two exon)	pHIV1-TAR-CAT	2068104
TatR55Q	R	55	Q	115	ON	NULL	estimated	HIV1-tat-72	pLTR1-CAT	8764071
TatR55L	R	55	L	98.5	ON	NULL	estimated	HIV1-Tat86	pEGFP-C2	17604883
TatM895 (R57S)	R	57	S	74	ON	NULL	reported	HIV1-tat-86	HIV1-TAR-CAT	1437550
TatA58T	A	58	T	155	ON	NULL	estimated	HIV1-tat-101	pLTR1-CAT	8764071
TatS62	S	62	A	70	ON	NULL	estimated	HIV1-tat-86	pLTR1-CAT/luc	15737233
TatS62A	S	62	A	104.7	ON	NULL	estimated	HIV1-tat-86	pLTR1-luc	25653431
TatS62D	S	62	D	93.8	ON	NULL	estimated	HIV1-tat-86	pLTR1-luc	25653431
TatT64	T	64	A	60	ON	NULL	estimated	HIV1-tat-86	pLTR1-CAT/luc	15737233
TatS68	S	68	A	50	ON	NULL	estimated	HIV1-tat-86	pLTR1-CAT/luc	15737233
TatS68A	S	68	A	98.4	ON	NULL	estimated	HIV1-tat-86	pLTR1-luc	25653431
TatS68D	S	68	D	68.8	ON	NULL	estimated	HIV1-tat-86	pLTR1-luc	25653431
TatM910	L	69	I	96	ON	NULL	reported	HIV1-tat-86	HIV1-TAR-CAT	1437550
TatK71A	K	71	A	142.9	ON	NULL	estimated	HIV1-tat-101	pLTR1-luc	23826228
TatK71Q	K	71	Q	100	ON	NULL	estimated	HIV1-tat-101	pLTR1-luc	23826228
TatG79A	G	79	A	100	ON	NULL	estimated	HIV1-Tat86	pEGFP-C2	17604883
TatK85A	K	85	A	157.1	ON	NULL	estimated	HIV1-tat-101	pLTR1-luc	23826228
TatK85Q	K	85	Q	107.1	ON	NULL	estimated	HIV1-tat-101	pLTR1-luc	23826228
TatK85R	K	85	R	135.7	ON	NULL	estimated	HIV1-tat-101	pLTR1-luc	23826228

## Sheet: Column Definitions
Column name	Description
Gene Name	Mutant description from paper
Ref aa	Reference amino acid for Tat position in row
Position	Tat amino acid position
Mutant aa	Mutant amino acid for Tat position in row
Activity (% of wt)	Tat Transcriptional activity as a percentage of wild type activity
Activity Boolean	Tat Transcriptional activity boolean using a threshold of 50% activity
Std Dev	Standard deviation for Transcriptional activity measured in pubication
Activity Masurement	Idenfities whether Tat activity was reported in pubication or estimated from a graph or other figure
Tat isoform	Isoform of Tat used as wild type in publication
Assay	Type of assay used for transcriptional activation
Pubmed ID	Source publication Pubmed identifier
