# Supplementary material for: GigaAssay – a high-throughput assay system for molecular functions and cell processes
Source: Research Square preprint supplement (doi:10.21203/rs.3.rs-708936/v1), 2021-07-12
Supplement: Supplementary file 7 [file 15eb43c52080b16f25bb6352.xlsx]

## Sheet: p and q missense
Ref aa	Position #	Mutant aa	LentiX293T.pval	LentiX293T.qval	LentiX293T.1.pval	LentiX293T.1.qval	LentiX293T.2.pval	LentiX293T.2.qval	Jurkat.pval	Jurkat.qval	Jurkat.1.pval	Jurkat.1.qval	Jurkat.2.pval	Jurkat.2.qval
E	2	A	7.44066e-49	8.40923e-49	6.44322e-30	1.06976e-29	1.22336e-28	5.37353e-28	6.20791e-53	1.53245e-52	8.62077e-15	1.92658e-14	2.05167e-10	2.33646e-10
E	2	C	5.28353e-52	6.12247e-52	5.98914e-37	1.20656e-36	6.40037e-25	2.59883e-24	5.68399e-81	1.14163e-79	1.7577e-50	7.49365e-49	1.16772e-09	1.30774e-09
E	2	D	0.614496	0.153698	0.382614	0.153519	0.892094	0.819781	1.22617e-20	1.35791e-20	0.137209	0.0825115	3.7868e-22	6.63668e-22
E	2	F	5.03864e-28	4.88103e-28	1.08303e-10	1.34052e-10	1.38402e-19	5.16894e-19	0.0512778	0.0209215	0.360292	0.148908	0.11056	0.0645393
E	2	G	2.93101e-31	2.90072e-31	2.84931e-16	3.78978e-16	1.50635e-16	5.29988e-16	5.29189e-44	1.09267e-43	6.57513e-05	8.71807e-05	1.11177e-22	2.02063e-22
E	2	H	0.0403967	0.0261348	0.263611	0.134883	0.084351	0.205621	0.00916066	0.00601457	0.215347	0.102979	0.00269847	0.00266781
E	2	I	9.75555e-11	7.88576e-11	0.00147827	0.00156432	3.7516e-09	1.18023e-08	0.00272523	0.00219743	0.0431752	0.0443954	0.0142685	0.013803
E	2	K	0.538676	0.141103	0.024689	0.0251851	0.0119841	0.0330816	2.07309e-08	1.92444e-08	0.00900751	0.0108058	0.000247027	0.000249241
E	2	L	2.22936e-12	1.83447e-12	0.26527	0.134884	5.61898e-14	1.91428e-13	0.0549124	0.0220202	0.273626	0.121358	0.146326	0.0766854
E	2	M	0.618638	0.154207	0.905224	0.271044	0.432204	0.755567	1	0.265705	0.642137	0.239334	0.503218	0.188087
E	2	N	1.78637e-51	2.05056e-51	0.488687	0.173906	3.9222e-57	8.42844e-56	0.431044	0.130188	0.443026	0.177157	0.736159	0.258036
E	2	P	1.33422e-76	2.16176e-76	4.45808e-41	1.06262e-40	3.629e-47	3.52011e-46	1.68943e-57	4.7853e-57	8.55003e-13	1.61731e-12	4.6227e-24	9.04099e-24
E	2	Q	0.930073	0.210489	0.637091	0.206315	0.773846	0.793209	0.253024	0.0799738	0.516681	0.200393	0.328167	0.133491
E	2	R	5.82847e-05	4.41873e-05	5.49523e-09	6.56544e-09	7.17481e-10	2.30384e-09	3.51059e-13	3.53352e-13	0.0298605	0.0329675	3.45892e-07	3.68994e-07
E	2	S	0.586559	0.148984	0.767635	0.238455	0.663028	0.785994	0.108356	0.0377	1	0.333675	0.258015	0.1108
E	2	T	0.962238	0.216298	0.58499	0.195532	0.657972	0.785994	0.0408712	0.0176709	0.103738	0.0720251	0.232087	0.10311
E	2	V	0.0584668	0.0367224	0.242751	0.133116	0.139428	0.32953	0.27574	0.0867195	0.300249	0.129199	0.626524	0.226217
E	2	W	1.58264e-12	1.30818e-12	2.49687e-08	2.91797e-08	1.29363e-05	3.85272e-05	8.55865e-05	7.40077e-05	0.0400876	0.0420794	4.4337e-13	5.41469e-13
E	2	Y	0.00527653	0.00368729	0.0879622	0.081135	0.0276611	0.0744447	0.0103331	0.00661597	0.0788578	0.0630673	0.122738	0.0691581
P	3	A	0.794544	0.186382	0.648632	0.208482	0.978456	0.838913	0.437047	0.131641	0.476424	0.187171	0.787865	0.271748
P	3	C	0.8804	0.201523	0.534571	0.184634	0.733729	0.790181	0.565508	0.165374	0.494456	0.193125	1	0.327347
P	3	D	0.349431	0.110465	0.775806	0.240182	0.3285	0.678683	0.0399037	0.017439	0.318482	0.135389	0.0844658	0.0562892
P	3	E	0.67083	0.16409	0.788078	0.242924	0.419215	0.746881	0.832151	0.229813	1	0.333675	0.737365	0.258123
P	3	F	1.85343e-21	1.68408e-21	0.719432	0.226699	1.86965e-27	7.93771e-27	0.771098	0.215239	0.687484	0.251835	1	0.327347
P	3	G	0.0132483	0.00903391	0.263129	0.134783	7.29588e-06	2.18687e-05	0.0551493	0.0220531	0.455051	0.181051	0.00428008	0.00420067
P	3	H	0.109074	0.0623094	0.317578	0.141961	0.00346852	0.00990756	0.00564557	0.0041926	0.0611083	0.054574	4.9135e-12	5.79101e-12
P	3	I	0.678583	0.165654	0.327901	0.143286	0.675326	0.785994	3.01261e-06	2.68924e-06	0.287472	0.12564	7.81032e-07	8.28286e-07
P	3	K	9.97719e-23	9.17942e-23	9.65635e-12	1.21078e-11	1.24572e-12	4.14286e-12	7.32324e-44	1.4981e-43	3.67043e-10	5.98315e-10	3.09177e-08	3.33785e-08
P	3	L	0.00493338	0.00346734	0.343805	0.146105	7.25709e-05	0.000213853	0.0663579	0.0252553	0.187785	0.0960115	0.207663	0.0954817
P	3	M	0.478551	0.13041	0.408972	0.15791	0.820599	0.802955	0.238288	0.0757496	0.37694	0.154278	0.475774	0.179344
P	3	N	3.00924e-22	2.75478e-22	0.0328224	0.0333407	3.45624e-24	1.38328e-23	1.19105e-48	2.76993e-48	7.44344e-05	9.77584e-05	7.22121e-25	1.48212e-24
P	3	Q	0.708486	0.171581	0.729511	0.228976	0.402222	0.731715	2.57356e-07	2.36911e-07	0.467701	0.185022	9.74717e-09	1.07158e-08
P	3	R	3.19965e-38	3.3097e-38	4.89821e-23	7.16843e-23	8.73921e-17	3.12996e-16	3.05844e-20	3.35342e-20	3.99217e-09	6.16321e-09	2.90989e-21	4.89329e-21
P	3	S	0.467602	0.129031	0.712061	0.224866	0.536725	0.771249	0.14582	0.0486288	0.485532	0.19031	0.136503	0.0733094
P	3	T	0.322307	0.106807	0.220211	0.131004	0.801465	0.799094	0.970355	0.261444	0.79182	0.279881	0.857067	0.291152
P	3	V	0.463931	0.1283	0.493771	0.17494	0.685704	0.785994	0.116216	0.039808	0.233975	0.108698	0.339236	0.136792
P	3	W	0.580985	0.14815	0.949493	0.280987	0.502702	0.765857	0.443619	0.133438	0.725784	0.261536	0.418932	0.162222
P	3	Y	2.22361e-15	1.9249e-15	2.20494e-18	3.02464e-18	0.934433	0.831014	1	0.265705	0.612633	0.231453	0.393921	0.153862
V	4	A	0.155399	0.0762863	0.292933	0.139347	0.355835	0.698471	0.13556	0.0455165	0.473346	0.186324	0.123151	0.0692012
V	4	C	0.554147	0.143261	0.481355	0.173347	0.855675	0.806477	0.7841	0.218317	0.976068	0.330666	0.666243	0.236913
V	4	D	0.00673264	0.00466919	0.209361	0.130768	0.0118511	0.0328442	9.896e-11	9.61039e-11	0.0171998	0.0201537	2.29082e-05	2.3509e-05
V	4	E	0.0017311	0.00125027	0.0183174	0.018926	0.00532337	0.0151131	2.09263e-36	3.31422e-36	1.31078e-11	2.29898e-11	9.3123e-09	1.02586e-08
V	4	F	0.0671209	0.0413772	0.313514	0.141837	0.126426	0.300836	0.000172931	0.000148953	0.0977889	0.0710148	0.00274531	0.00270915
V	4	G	2.5261e-17	2.22355e-17	8.91472e-08	1.02933e-07	4.80744e-11	1.56526e-10	7.95434e-16	8.17388e-16	5.7661e-07	8.25779e-07	2.60888e-10	2.95233e-10
V	4	H	0.0182137	0.0123052	0.201468	0.128452	0.0448321	0.11793	0.000859613	0.000724877	0.0162779	0.0191545	2.11336e-13	2.61048e-13
V	4	I	0.490756	0.132321	0.61235	0.200706	0.612225	0.778563	0.0711833	0.0265208	0.240836	0.110679	0.167086	0.0825933
V	4	K	1.92469e-72	2.91229e-72	1.71993e-28	2.80718e-28	8.63499e-46	7.39955e-45	6.67548e-77	7.97211e-76	3.99778e-29	4.61604e-28	1.59797e-28	5.09628e-28
V	4	L	4.2431e-12	3.48368e-12	0.479002	0.173018	6.25929e-15	2.16409e-14	0.0615052	0.0238815	0.298169	0.128652	0.0964703	0.0604461
V	4	M	0.222728	0.0893294	0.943312	0.27933	0.0949883	0.230345	0.122791	0.0418149	0.460869	0.182841	0.132223	0.0719721
V	4	N	7.80586e-21	7.05758e-21	1.34582e-13	1.7326e-13	1.08815e-08	3.39266e-08	1	0.265705	2.9214e-06	4.02771e-06	3.65997e-23	6.90782e-23
V	4	P	0.0159433	0.0108112	0.182413	0.12565	0.0444016	0.117018	0.0325623	0.0151775	0.295008	0.127737	0.0140075	0.0135749
V	4	Q	0.370993	0.113207	0.592014	0.196312	0.490436	0.765105	0.0399402	0.017439	0.216526	0.103187	2.49074e-15	3.31972e-15
V	4	R	1.42289e-54	1.67533e-54	1.75334e-25	2.7058e-25	7.88987e-31	3.64917e-30	8.28161e-61	2.65172e-60	1.45966e-24	1.01124e-23	4.95869e-18	7.13781e-18
V	4	S	0.00127901	0.000932953	0.0403111	0.0401847	0.0133101	0.0365972	1.37591e-10	1.33035e-10	0.000112906	0.000147238	3.61394e-18	5.22999e-18
V	4	T	0.277735	0.0995107	0.683078	0.218098	0.288465	0.617982	0.683853	0.193949	0.906076	0.312454	0.640107	0.229891
V	4	W	4.8365e-05	3.67429e-05	0.00711218	0.00742821	6.49753e-06	1.95176e-05	0.00383759	0.00298016	0.0591704	0.053761	6.9699e-18	9.95322e-18
V	4	Y	0.166229	0.0787439	0.539828	0.185789	0.210553	0.475888	0.0358939	0.0161511	0.110699	0.0738354	0.182011	0.087535
D	5	A	3.21287e-15	2.77471e-15	3.42174e-05	3.72741e-05	2.16423e-13	7.28427e-13	7.19616e-06	6.39789e-06	0.0233791	0.0264979	2.07919e-14	2.69145e-14
D	5	C	0.036656	0.0239261	0.110515	0.0957037	0.172683	0.401334	0.0262934	0.0131279	0.22116	0.104319	3.83327e-14	4.89168e-14
D	5	E	0.647915	0.15955	0.789089	0.24308	0.743112	0.793209	0.307643	0.0956634	0.445769	0.177997	0.505337	0.188643
D	5	F	2.07718e-68	2.90311e-68	6.87486e-56	2.71323e-55	6.96907e-29	3.08048e-28	1.27117e-47	2.91032e-47	3.95444e-16	1.01546e-15	1.54063e-22	2.76287e-22
D	5	G	2.39222e-38	2.48856e-38	4.50585e-10	5.50634e-10	1.39463e-31	6.51508e-31	3.94044e-42	7.77301e-42	0.000204913	0.000265972	5.95481e-45	2.67865e-43
D	5	H	3.1443e-06	2.42393e-06	0.0374128	0.0376069	2.19619e-06	6.68326e-06	1.02839e-76	1.16516e-75	1.63821e-72	1.8159e-70	7.7622e-13	9.39461e-13
D	5	I	1.54111e-66	2.11356e-66	6.78045e-45	1.94326e-44	1.30598e-34	6.60934e-34	4.75556e-56	1.31333e-55	7.15769e-18	2.24126e-17	1.8648e-18	2.7503e-18
D	5	K	1.77738e-91	4.48852e-91	1.03128e-69	1.3067e-68	1.05854e-35	5.517e-35	9.17462e-62	3.07119e-61	4.27331e-16	1.09143e-15	7.61865e-23	1.40359e-22
D	5	L	3.00309e-27	2.87869e-27	4.3811e-06	4.90566e-06	8.61656e-23	3.33394e-22	2.19925e-16	2.28117e-16	1.44121e-06	2.0222e-06	3.74149e-06	3.89892e-06
D	5	M	7.12366e-28	6.88262e-28	3.43397e-15	4.5175e-15	2.36996e-14	8.11356e-14	2.10446e-29	2.75933e-29	3.20212e-17	9.39006e-17	1.31655e-24	2.66168e-24
D	5	N	0.288478	0.10121	0.81405	0.249651	0.052688	0.137047	0.0481301	0.0200067	0.196159	0.0984764	0.127889	0.0705134
D	5	P	0.0402377	0.0260897	0.138911	0.109864	0.174456	0.404781	0.0104431	0.00663556	0.0995832	0.0713144	9.88434e-15	1.29503e-14
D	5	Q	3.24365e-13	2.6933e-13	0.000877452	0.000930573	3.53783e-12	1.17099e-11	0.0024685	0.00200875	0.0561362	0.0524664	3.20935e-15	4.24605e-15
D	5	R	1.29687e-53	1.51719e-53	6.64066e-23	9.68903e-23	1.77744e-32	8.53166e-32	5.07586e-64	1.95031e-63	2.96219e-17	8.73267e-17	1.7407e-25	3.72865e-25
D	5	S	0.00687197	0.00475681	0.242664	0.133116	0.00618596	0.0174909	0.386728	0.117931	0.701448	0.254929	0.397138	0.154782
D	5	T	6.60139e-44	7.19426e-44	1.48904e-19	2.08416e-19	5.07544e-26	2.10366e-25	1.18791e-53	3.03409e-53	1.49137e-06	2.0873e-06	1.58177e-54	1.70766e-52
D	5	V	7.2528e-95	2.12464e-94	6.54268e-79	3.1502e-77	4.86015e-28	2.07603e-27	1.93837e-59	5.74836e-59	2.49748e-23	1.45704e-22	1.36049e-20	2.24583e-20
D	5	W	1.25586e-58	1.55887e-58	2.52148e-34	4.6338e-34	1.0272e-35	5.37371e-35	3.87199e-41	7.31158e-41	1.71856e-07	2.49995e-07	3.55032e-06	3.70685e-06
D	5	Y	4.58323e-99	1.55395e-98	1.02931e-41	2.59475e-41	5.28696e-36	2.7867e-35	5.18746e-46	1.12915e-45	2.0639e-12	3.8257e-12	3.95746e-06	4.11603e-06
P	6	A	0.946715	0.213332	0.70316	0.222445	0.831048	0.803292	0.334373	0.103104	0.497236	0.193937	0.502	0.187918
P	6	C	0.732484	0.176166	0.490542	0.174438	0.836766	0.803292	0.531419	0.15666	0.575483	0.219362	0.771378	0.267257
P	6	D	0.26621	0.0975837	0.373182	0.151374	0.522423	0.77067	0.391258	0.119231	0.551819	0.212655	0.526374	0.194395
P	6	E	0.0947793	0.0560947	0.641403	0.207065	0.0634501	0.158262	0.0623006	0.0240635	0.255212	0.115091	0.122671	0.0691581
P	6	F	0.631968	0.156571	0.603085	0.198752	0.822894	0.803292	0.0511127	0.0208735	0.181805	0.0946124	0.164047	0.0817652
P	6	G	0.588975	0.149355	0.626987	0.203999	0.763471	0.793209	0.913579	0.247961	0.952138	0.324144	0.94616	0.317028
P	6	H	0.616354	0.153743	0.557205	0.189467	0.859383	0.808315	0.131976	0.0444819	0.260553	0.117011	0.3273	0.13334
P	6	I	0.458867	0.127196	0.778455	0.240729	0.470331	0.765105	0.903002	0.246349	0.77755	0.276423	0.881403	0.298667
P	6	K	6.76486e-72	1.00696e-71	3.92666e-30	6.54197e-30	1.55554e-43	1.13757e-42	7.45864e-89	3.29573e-87	3.1856e-40	7.35651e-39	3.12593e-26	7.2731e-26
P	6	L	0.001126	0.000822983	1.60474e-06	1.80527e-06	0.0822734	0.201259	0.0165859	0.00932413	0.262954	0.117685	5.09296e-13	6.19179e-13
P	6	M	0.705338	0.170932	1	0.290401	0.657516	0.785994	1	0.265705	0.642745	0.239334	0.372374	0.146807
P	6	N	0.696043	0.168791	0.956508	0.282716	0.654693	0.785994	0.510678	0.151343	0.641467	0.239248	0.649895	0.232479
P	6	Q	0.0227002	0.0151961	0.000313546	0.000333999	0.265222	0.580806	0.229578	0.073403	0.569451	0.217811	0.211852	0.0967917
P	6	R	0.0315141	0.0207549	0.180237	0.124866	0.0985845	0.238238	0.404136	0.122732	0.0659763	0.0567827	0.116792	0.0670681
P	6	S	1	0.222329	0.812838	0.249439	0.823523	0.803292	0.668923	0.190448	0.877947	0.304307	0.652405	0.232913
P	6	T	0.451004	0.12598	0.500406	0.176641	0.668795	0.785994	4.06903e-18	4.33246e-18	1.44542e-21	6.96611e-21	0.603203	0.218821
P	6	V	0.590509	0.14958	0.473435	0.171766	0.917596	0.826789	0.531255	0.15666	0.737663	0.264107	0.585638	0.213166
P	6	W	0.219903	0.0892899	0.268155	0.135622	0.504734	0.765857	0.00377823	0.00293922	0.0481682	0.047929	0.0354507	0.0320538
P	6	Y	0.383053	0.114894	0.354867	0.148448	0.71267	0.785994	0.114488	0.0393073	0.19022	0.0964946	0.367533	0.145568
R	7	A	0.348938	0.110465	0.249058	0.133185	0.866514	0.810132	0.00339453	0.00267368	0.0512892	0.0499582	0.0283121	0.0264407
R	7	C	0.235136	0.0917247	0.17946	0.124866	0.68589	0.785994	0.0116367	0.0072116	0.10096	0.0714824	0.0549849	0.0446997
R	7	D	0.152797	0.0757963	0.107409	0.0936883	0.655486	0.785994	0.00705434	0.00495302	0.045715	0.0464044	0.0764779	0.0533647
R	7	E	0.138552	0.0724775	0.243109	0.133116	0.336583	0.683336	0.00271023	0.00218933	0.0265054	0.0298581	0.0532431	0.0438115
R	7	F	0.167458	0.0788956	0.139311	0.109961	0.604516	0.778563	0.035287	0.0159756	0.147438	0.0849857	0.127259	0.0705134
R	7	G	0.190225	0.0834711	0.239368	0.132932	0.465573	0.765105	2.95649e-17	3.10304e-17	0.20313	0.0999648	3.03699e-19	4.67052e-19
R	7	H	0.103652	0.0597654	0.169038	0.121658	0.333683	0.682108	0.00851853	0.00571179	0.0725981	0.06012	0.0554654	0.0449548
R	7	I	9.30661e-42	9.9645e-42	0.490909	0.174439	1.82645e-45	1.51855e-44	0.100299	0.0353139	0.252097	0.114431	0.24571	0.107221
R	7	K	2.16722e-08	1.70663e-08	0.213528	0.131004	3.99386e-09	1.25362e-08	0.0204883	0.0108421	0.0875347	0.0668843	0.141308	0.0747087
R	7	L	0.116514	0.0654365	0.17395	0.123168	0.361434	0.702152	0.00204412	0.00168199	0.0370386	0.0394012	0.023683	0.022428
R	7	M	0.234916	0.0917247	0.21584	0.131004	0.623693	0.780024	0.0102164	0.00656442	0.0973013	0.0710148	0.0472011	0.0398731
R	7	N	0.196547	0.0844727	0.24428	0.133116	0.479012	0.765105	3.7346e-12	3.70831e-12	0.0640925	0.0558525	2.24195e-12	2.6715e-12
R	7	P	1.22284e-32	1.22009e-32	2.60661e-10	3.20164e-10	1.15426e-25	4.75594e-25	1.14241e-44	2.41528e-44	1.03471e-07	1.52114e-07	4.19952e-07	4.47117e-07
R	7	Q	0.265131	0.0975248	0.223082	0.131037	0.682445	0.785994	0.00465164	0.00354381	0.0314709	0.0344178	0.0713276	0.0515498
R	7	S	4.63466e-09	3.67338e-09	0.227642	0.131897	5.12757e-10	1.65026e-09	0.00281342	0.0022521	0.0335292	0.0364372	0.0349011	0.0317162
R	7	T	0.255948	0.0955371	0.202882	0.128458	0.687031	0.785994	0.00535476	0.00401714	0.0508074	0.0497184	0.0474749	0.0399793
R	7	V	0.379858	0.114576	0.272069	0.136456	0.843697	0.80424	0.0385109	0.0170338	0.14704	0.0849857	0.141749	0.0748682
R	7	W	0.148079	0.0750627	0.253375	0.133621	0.345778	0.69279	0.0156451	0.00895474	0.0938775	0.070027	0.0804472	0.0548989
R	7	Y	0.39298	0.115955	0.391455	0.155003	0.68091	0.785994	0.0130008	0.00778409	0.0604159	0.0542983	0.104433	0.0631271
L	8	A	0.526547	0.139018	1	0.290401	0.397682	0.731715	0.0112588	0.00702668	0.205772	0.10048	0.107166	0.0633547
L	8	C	0.946131	0.213332	0.780978	0.241199	0.929661	0.828326	1	0.265705	0.752565	0.26823	0.677082	0.240293
L	8	D	0.0669117	0.0413178	0.00347127	0.00364927	0.38542	0.725698	0.0733829	0.0272255	0.238017	0.109748	0.159058	0.0803919
L	8	E	0.865221	0.198885	0.869246	0.262895	0.916811	0.826789	1	0.265705	0.932206	0.319123	1	0.327347
L	8	F	0.0134194	0.00913358	0.15692	0.116646	0.044271	0.116895	0.0102893	0.00659874	0.0799966	0.0635198	0.0629972	0.0478829
L	8	G	2.59124e-68	3.60779e-68	3.52846e-36	6.79561e-36	1.24299e-34	6.31342e-34	1.42633e-53	3.62212e-53	3.16654e-12	5.81127e-12	2.65548e-09	2.94336e-09
L	8	H	0.00456829	0.00321692	0.0547945	0.0536234	0.0426091	0.11272	0.00344734	0.00270563	0.0637451	0.0557251	0.0157329	0.0151924
L	8	I	0.244039	0.0936584	0.256199	0.134008	0.57467	0.778563	2.74346e-27	3.42443e-27	2.96033e-30	3.81561e-29	0.21021	0.0962725
L	8	K	0.0273669	0.0181214	0.110777	0.0957042	0.12292	0.293493	0.00400905	0.00309157	0.0357405	0.0385776	1.52744e-14	1.98199e-14
L	8	M	0.450525	0.12598	0.311102	0.141503	0.919017	0.826789	0.307365	0.0956441	0.682278	0.250977	0.3027	0.125016
L	8	N	0.170461	0.0793124	0.663551	0.212427	0.130744	0.310582	0.0624067	0.0240834	0.294016	0.127509	0.0955577	0.0602907
L	8	P	2.65973e-72	4.00794e-72	1.32119e-40	3.01484e-40	3.95922e-39	2.35327e-38	1.29482e-50	3.14361e-50	4.52038e-17	1.3186e-16	1.09141e-08	1.19744e-08
L	8	Q	0.37067	0.113203	0.960333	0.283325	0.245858	0.544234	0.489687	0.145708	0.808909	0.28429	0.424251	0.163728
L	8	R	0.0226875	0.0151961	0.305814	0.141286	0.0310747	0.0829919	0.000326025	0.000278108	0.0555161	0.0522392	2.071e-13	2.56402e-13
L	8	S	0.0728023	0.0443569	0.119123	0.100802	0.283178	0.608524	0.00699859	0.00492429	0.0415285	0.0431829	0.0778323	0.0540019
L	8	T	0.551158	0.142985	0.30652	0.141286	0.848123	0.805336	0.132439	0.044604	0.259857	0.116805	0.317927	0.130407
L	8	V	0.868107	0.199173	0.643871	0.207506	0.884917	0.818643	0.240523	0.0762097	0.327519	0.138355	0.534485	0.196937
L	8	W	0.218153	0.0892873	0.309095	0.141503	0.447946	0.765105	0.235446	0.075008	0.354507	0.147066	0.456072	0.173737
L	8	Y	0.00844958	0.00578324	0.168616	0.121536	0.0203675	0.0555647	0.00236187	0.00192908	0.0316407	0.0345204	5.85293e-14	7.38174e-14
E	9	A	0.1978	0.0846139	0.258853	0.134709	0.461971	0.765105	0.0124346	0.00751634	0.122127	0.0778009	0.0466542	0.039722
E	9	C	0.00017133	0.000128559	5.63682e-07	6.40104e-07	0.475146	0.765105	0.75679	0.211781	0.872844	0.303128	0.776213	0.268587
E	9	D	1.98757e-12	1.63919e-12	4.44836e-14	5.80439e-14	0.449223	0.765105	0.0588378	0.0231628	0.161479	0.0888917	0.22796	0.102029
E	9	F	5.06576e-187	3.0916e-185	3.31349e-54	1.2464e-53	7.56206e-115	1.76043e-112	1.41813e-49	3.35094e-49	1.10466e-14	2.44895e-14	1.25732e-09	1.40226e-09
E	9	G	0.0193468	0.0129988	0.422044	0.160908	0.0274326	0.0739722	0.105819	0.0368752	0.293466	0.127468	0.210275	0.0962725
E	9	H	1.09705e-27	1.05714e-27	4.60791e-08	5.33327e-08	3.5096e-24	1.40062e-23	4.75201e-06	4.23338e-06	0.422896	0.170337	8.2571e-26	1.83421e-25
E	9	I	5.03215e-104	2.09393e-103	1.00992e-46	3.24174e-46	5.54406e-39	3.28131e-38	1.4222e-47	3.23931e-47	5.23615e-35	9.36145e-34	1.3222e-08	1.44186e-08
E	9	K	2.52517e-61	3.16664e-61	4.71581e-14	6.12019e-14	2.43882e-49	2.85014e-48	5.45409e-45	1.16425e-44	1.14268e-10	1.90757e-10	1.09336e-06	1.15497e-06
E	9	L	5.30069e-14	4.48264e-14	7.91773e-06	8.80431e-06	7.65226e-10	2.45151e-09	5.59685e-40	1.01772e-39	0.000633358	0.000808821	1.38635e-06	1.45876e-06
E	9	M	0.600866	0.151845	0.987398	0.290243	0.489767	0.765105	0.702332	0.198553	1	0.333675	0.502498	0.187974
E	9	N	1.17572e-09	9.39997e-10	0.0120161	0.0124689	2.48757e-09	7.84336e-09	1.97006e-05	1.73754e-05	0.00810273	0.00976261	4.20141e-12	4.9844e-12
E	9	P	0.0965771	0.0567298	0.103377	0.0914047	0.438685	0.759294	4.06229e-53	1.01412e-52	1.69764e-29	2.00189e-28	2.97742e-25	6.2054e-25
E	9	Q	0.413307	0.119564	0.455585	0.168252	0.674673	0.785994	0.654715	0.186885	1	0.333675	0.40176	0.156133
E	9	R	8.59345e-95	2.49739e-94	1.35871e-44	3.82573e-44	2.16106e-52	3.21122e-51	7.42096e-48	1.70786e-47	3.38054e-06	4.64915e-06	1.44692e-08	1.57467e-08
E	9	S	0.713234	0.172389	0.603041	0.198752	0.951703	0.833337	0.206023	0.0663521	0.389305	0.158768	0.363267	0.144184
E	9	T	0.0015785	0.00114457	0.0602203	0.056965	3.2028e-07	9.89742e-07	3.81982e-05	3.33568e-05	0.0162427	0.0191537	0.0215508	0.0205894
E	9	V	0.541954	0.141649	0.39178	0.155003	0.954028	0.833337	0.143954	0.0481519	0.353654	0.146929	0.254558	0.109927
E	9	W	1.50126e-133	1.19506e-132	1.84461e-64	1.15345e-63	1.21877e-69	4.86389e-68	1.67452e-69	9.36604e-69	5.35474e-42	1.41323e-40	5.62422e-27	1.45958e-26
E	9	Y	2.2967e-79	3.96697e-79	6.08469e-47	1.96623e-46	2.31409e-42	1.57673e-41	8.96089e-61	2.84858e-60	7.59025e-14	1.57557e-13	1.53729e-26	3.73795e-26
P	10	A	0.694203	0.168456	0.558356	0.189591	1	0.838913	2.39056e-09	2.24747e-09	0.253124	0.114687	3.10264e-13	3.82372e-13
P	10	C	1	0.222329	0.624788	0.203679	0.6598	0.785994	0.802304	0.222824	0.711479	0.257561	0.966969	0.323198
P	10	D	5.00355e-39	5.21989e-39	4.3676e-17	5.89057e-17	1.38202e-23	5.43772e-23	2.17881e-25	2.60907e-25	3.77872e-11	6.40456e-11	1.42916e-25	3.08581e-25
P	10	E	0.00280607	0.00199906	0.0564445	0.0544565	0.0234759	0.0637955	6.25752e-07	5.72146e-07	0.00577474	0.00712818	1.00478e-12	1.21066e-12
P	10	F	4.16236e-71	6.07234e-71	1.03055e-25	1.59548e-25	2.91606e-47	2.8684e-46	8.109e-21	9.07115e-21	5.20662e-17	1.51083e-16	1.68103e-05	1.7317e-05
P	10	G	0.418435	0.120646	0.941695	0.279194	0.183635	0.421874	0.0609483	0.023763	0.330412	0.139259	0.0637234	0.0480413
P	10	H	0.0192234	0.0129396	0.283893	0.138333	0.025967	0.0702916	5.54506e-10	5.28057e-10	5.66912e-07	8.13993e-07	0.000216498	0.000218848
P	10	I	0.195588	0.0844727	0.830061	0.253432	0.111618	0.268343	4.0544e-21	4.55855e-21	1.54768e-24	1.05224e-23	1	0.327347
P	10	K	0.984289	0.220712	0.784621	0.242125	0.783895	0.793451	0.258042	0.0814431	0.69704	0.254218	0.235455	0.103923
P	10	L	5.14464e-44	5.64025e-44	2.66731e-17	3.62788e-17	1.28377e-28	5.59605e-28	3.18199e-13	3.21009e-13	1.07648e-07	1.57836e-07	1.12131e-16	1.54407e-16
P	10	M	6.30607e-44	6.89293e-44	8.05671e-19	1.11471e-18	6.2858e-27	2.63662e-26	1.16593e-31	1.59501e-31	1.35263e-13	2.75614e-13	6.48212e-30	2.57281e-29
P	10	N	0.463484	0.128282	0.32425	0.143231	0.938058	0.832446	0.0164082	0.00924779	0.062911	0.0552733	0.148315	0.0770513
P	10	Q	0.0724467	0.0442137	0.221312	0.131037	0.202991	0.461034	0.34013	0.104675	0.495098	0.193239	0.507695	0.189308
P	10	R	0.0898313	0.0537485	0.488511	0.173906	0.0972433	0.235405	0.0353376	0.0159821	0.105015	0.0724999	0.239939	0.105385
P	10	S	0.289382	0.10121	0.188465	0.126998	0.85233	0.806163	2.22515e-67	1.10474e-66	1.1407e-71	1.05369e-69	0.382429	0.150133
P	10	T	0.146387	0.0746501	0.307798	0.141503	0.300661	0.637268	0.131274	0.0442791	0.372951	0.152886	0.219634	0.0994608
P	10	V	0.0523094	0.0331967	0.332166	0.143695	0.0883071	0.214516	0.0103731	0.00661597	0.107179	0.0730654	4.0551e-14	5.15041e-14
P	10	W	3.06197e-83	5.87027e-83	5.00343e-57	2.13192e-56	5.02361e-43	3.45661e-42	8.35175e-59	2.39634e-58	9.92754e-19	3.52703e-18	5.39948e-20	8.67444e-20
P	10	Y	2.90849e-38	3.01705e-38	3.25906e-19	4.54837e-19	9.45033e-21	3.5676e-20	2.15002e-54	5.58837e-54	1.41816e-06	1.9949e-06	5.9218e-24	1.14163e-23
W	11	A	0.85211	0.196117	0.404998	0.157258	0.572709	0.778563	0.456908	0.136877	0.525531	0.203399	0.719736	0.252811
W	11	C	0.514815	0.136802	0.814595	0.24966	0.52764	0.77067	0.488778	0.145536	0.569917	0.217839	0.698786	0.246215
W	11	D	0.0966732	0.0567298	0.492362	0.174826	0.106327	0.256064	0.00244032	0.00198948	0.100205	0.0714759	3.4156e-13	4.19983e-13
W	11	E	0.756117	0.17967	0.451542	0.167885	0.799938	0.799094	0.758968	0.212256	0.82902	0.290253	0.853104	0.289988
W	11	F	0.00134522	0.000979299	0.13493	0.107918	1.65075e-09	5.22847e-09	0.00663127	0.00473368	0.0981274	0.0710148	3.93299e-14	5.0071e-14
W	11	G	0.307548	0.104055	0.880368	0.265425	0.206723	0.468366	3.60321e-12	3.58591e-12	0.237547	0.109622	2.57976e-25	5.46095e-25
W	11	H	0.0120162	0.00820905	0.0726284	0.0677703	0.0763009	0.187634	0.00221327	0.00181442	0.0612837	0.054574	3.74354e-14	4.7885e-14
W	11	I	3.78469e-72	5.67977e-72	3.37319e-33	5.99314e-33	1.07166e-40	6.71246e-40	6.84816e-70	3.98155e-69	3.39068e-10	5.54345e-10	1.51278e-30	6.58541e-30
W	11	K	5.06884e-58	6.22849e-58	3.51084e-38	7.38174e-38	2.49168e-21	9.45748e-21	4.29741e-61	1.38605e-60	1.1437e-18	4.01189e-18	8.97833e-19	1.34624e-18
W	11	L	1.02549e-63	1.34111e-63	2.69961e-42	6.91393e-42	1.10811e-33	5.52782e-33	3.39701e-56	9.50018e-56	1.47285e-16	3.95921e-16	1.11635e-21	1.90696e-21
W	11	M	0.0558098	0.0352348	0.407499	0.15784	0.0671434	0.167175	0.049735	0.0205194	0.239192	0.110198	0.0965265	0.0604461
W	11	N	1.85728e-05	1.41392e-05	0.00016514	0.000177088	0.005266	0.0149806	5.96346e-44	1.22561e-43	2.13878e-39	4.55916e-38	2.07791e-17	2.92858e-17
W	11	P	7.99404e-41	8.46019e-41	4.40231e-27	6.92694e-27	6.94858e-25	2.81325e-24	8.73196e-40	1.5813e-39	5.41502e-10	8.72437e-10	5.02292e-05	5.11575e-05
W	11	Q	0.0134837	0.00916029	0.12399	0.103642	0.0568506	0.145703	0.0334671	0.0154319	0.17827	0.0936913	3.57133e-13	4.38133e-13
W	11	R	6.79923e-24	6.31908e-24	2.21415e-09	2.67188e-09	1.06845e-16	3.80713e-16	2.75314e-47	6.20675e-47	8.18987e-11	1.37549e-10	1.98349e-19	3.07666e-19
W	11	S	0.635254	0.157066	0.913566	0.272871	0.470647	0.765105	1	0.265705	1	0.333675	1	0.327347
W	11	T	1.43557e-22	1.31747e-22	1.23169e-08	1.4571e-08	9.50922e-17	3.39703e-16	7.17877e-07	6.54035e-07	0.00180681	0.0022656	8.04065e-16	1.08508e-15
W	11	V	1.53077e-23	1.41548e-23	1.10046e-05	1.21526e-05	1.40259e-20	5.28067e-20	1.94191e-18	2.07765e-18	4.42733e-06	6.0587e-06	1.27507e-22	2.30193e-22
W	11	Y	0.725093	0.174909	0.931191	0.276762	0.591534	0.778563	0.933958	0.25246	0.834153	0.291314	0.554388	0.203992
K	12	A	0.672292	0.164337	0.588549	0.196109	0.909281	0.825992	0.0255273	0.0128471	0.154254	0.0866185	0.0814621	0.0549837
K	12	C	0.573992	0.146593	0.376759	0.151929	0.960804	0.835642	0.126904	0.0430352	0.251689	0.114431	0.321241	0.131466
K	12	D	0.24564	0.0940873	0.151836	0.11531	0.77676	0.793451	0.0368741	0.0164415	0.113824	0.0746878	0.186486	0.0887296
K	12	E	0.214578	0.0884833	0.2461	0.133116	0.514617	0.77067	0.00891657	0.00590697	0.09962	0.0713144	0.0401696	0.0354883
K	12	F	0.497442	0.133249	0.43469	0.164026	0.819312	0.802955	0.112144	0.0386529	0.417744	0.168875	0.148244	0.0770513
K	12	G	0.20275	0.0861279	1.18904e-09	1.43845e-09	1.09277e-23	4.31179e-23	0.240598	0.0762097	0.488332	0.191002	0.316664	0.129988
K	12	H	0.268725	0.098064	0.169865	0.121807	0.838053	0.803292	0.0170268	0.00952356	0.0782493	0.0627617	0.124849	0.0695563
K	12	I	0.54377	0.141719	0.642731	0.207277	0.690392	0.785994	0.644668	0.184853	0.68256	0.250977	0.864829	0.29342
K	12	L	0.121303	0.0666942	0.19277	0.12735	0.35524	0.698471	2.22717e-15	2.27805e-15	0.08743	0.0668843	2.87795e-16	3.93292e-16
K	12	M	0.338993	0.109254	0.222774	0.131037	0.880006	0.817874	0.0699568	0.0261299	0.165701	0.0902131	0.262104	0.11211
K	12	N	0.434255	0.122821	0.230744	0.132104	0.950075	0.833337	0.0105912	0.00670472	0.0489171	0.0483271	0.14067	0.0745171
K	12	P	2.68423e-145	3.17065e-144	3.56372e-62	1.86508e-61	2.23806e-96	3.12611e-94	2.2652e-50	5.46951e-50	5.3941e-12	9.73809e-12	1.76007e-23	3.34535e-23
K	12	Q	0.152467	0.0757963	0.231447	0.132313	0.391128	0.728432	0.0296736	0.0142986	0.151346	0.0856802	0.0994993	0.0613119
K	12	R	0.420501	0.120936	0.467577	0.171072	0.66404	0.785994	0.0679818	0.0256331	0.257964	0.116143	0.146747	0.0767805
K	12	S	0.546821	0.142211	0.304288	0.141286	0.908998	0.825992	0.129498	0.0437469	0.185343	0.0953224	0.509685	0.189873
K	12	T	0.791037	0.185917	0.779878	0.241014	0.54497	0.772801	0.914622	0.248092	0.924806	0.31757	1	0.327347
K	12	V	0.753608	0.179219	0.4121	0.158482	0.715813	0.785994	0.646586	0.185196	0.588465	0.223235	1	0.327347
K	12	W	0.572017	0.146475	0.741621	0.232171	0.651822	0.785994	0.617389	0.177955	0.715374	0.258464	0.739267	0.258454
K	12	Y	6.36445e-12	5.21367e-12	7.31482e-14	9.46767e-14	0.739536	0.793209	0.674961	0.191797	0.949882	0.323772	0.420754	0.162694
H	13	A	5.85367e-38	6.02099e-38	1.10618e-06	1.25026e-06	3.06379e-33	1.50686e-32	2.88802e-05	2.53199e-05	0.0146834	0.0174636	1.55008e-12	1.85939e-12
H	13	C	2.28306e-19	2.04402e-19	5.13538e-07	5.84541e-07	1.17829e-16	4.18786e-16	9.80731e-42	1.90905e-41	3.74055e-08	5.60308e-08	2.5881e-20	4.23347e-20
H	13	D	5.52365e-90	1.3134e-89	9.53861e-41	2.20803e-40	4.46853e-51	6.0598e-50	4.90723e-33	6.97218e-33	1.47872e-16	3.95921e-16	1.47641e-25	3.17512e-25
H	13	E	5.56759e-57	6.75073e-57	1.70941e-38	3.64183e-38	6.98596e-20	2.61606e-19	4.816e-27	5.96089e-27	7.89391e-08	1.1698e-07	1.29371e-23	2.46764e-23
H	13	F	3.81275e-103	1.50122e-102	4.24375e-46	1.31826e-45	1.51382e-38	8.77382e-38	3.87521e-81	8.15396e-80	1.14155e-58	7.02984e-57	6.5894e-12	7.73245e-12
H	13	G	8.93715e-44	9.7109e-44	2.19508e-23	3.24202e-23	4.71013e-22	1.80744e-21	3.781e-15	3.85844e-15	1.46971e-05	1.9819e-05	5.48209e-11	6.29618e-11
H	13	I	1.01896e-33	1.02787e-33	1.63662e-16	2.18285e-16	6.77343e-19	2.48322e-18	1.82295e-55	4.88185e-55	4.29753e-18	1.36105e-17	6.07322e-19	9.13175e-19
H	13	K	1.03269e-102	4.02283e-102	1.80892e-66	1.52802e-65	2.66202e-48	2.7957e-47	1.76167e-75	1.76915e-74	1.08254e-27	1.11107e-26	5.59725e-28	1.63317e-27
H	13	L	0.00156648	0.00113811	0.0933092	0.0846082	0.00567386	0.0160754	1.98687e-07	1.83285e-07	7.15608e-05	9.44319e-05	8.62007e-15	1.1349e-14
H	13	M	0.790266	0.185917	0.695378	0.220999	0.483144	0.765105	0.537253	0.158158	0.731903	0.262384	0.568424	0.208588
H	13	N	4.90471e-11	3.99108e-11	2.91296e-08	3.39599e-08	0.000218015	0.000635744	4.39623e-10	4.21378e-10	0.0164256	0.0192873	4.29915e-06	4.46281e-06
H	13	P	1.89903e-148	3.02339e-147	2.39474e-61	1.22663e-60	8.25345e-89	6.78137e-87	6.0933e-63	2.18897e-62	3.34663e-22	1.73347e-21	1.04339e-13	1.30677e-13
H	13	Q	0.497103	0.133249	0.487656	0.173906	0.754588	0.793209	0.237496	0.0756065	0.347459	0.145448	0.497864	0.186758
H	13	R	0.00518597	0.00363093	0.0611875	0.0576534	0.0730188	0.180281	0.00189553	0.00156556	0.0426619	0.0441131	1.05511e-14	1.37903e-14
H	13	S	6.05022e-45	6.69319e-45	1.45238e-16	1.94249e-16	1.65335e-29	7.37823e-29	2.26194e-40	4.18192e-40	2.02291e-07	2.92732e-07	1.96271e-07	2.09794e-07
H	13	T	5.315e-57	6.46587e-57	1.30817e-35	2.49946e-35	1.48413e-28	6.43794e-28	7.04082e-53	1.7284e-52	1.79421e-12	3.34819e-12	3.08123e-10	3.47957e-10
H	13	V	2.54574e-53	2.96876e-53	1.49656e-22	2.16387e-22	9.88021e-33	4.77529e-32	7.09498e-70	4.01929e-69	3.75227e-10	6.08079e-10	2.74345e-37	3.52596e-36
H	13	W	0.265268	0.0975248	0.554151	0.188829	0.357627	0.698643	0.132978	0.0447514	0.501324	0.195257	0.188171	0.0890601
H	13	Y	2.78878e-26	2.64555e-26	2.23073e-08	2.61329e-08	1.84254e-19	6.86304e-19	1.1695e-21	1.32844e-21	4.91599e-05	6.53383e-05	1.27691e-18	1.89881e-18
P	14	A	0.102117	0.0591656	0.363984	0.149917	0.178123	0.412248	2.15342e-05	1.89547e-05	0.001331	0.00167276	8.42257e-13	1.01711e-12
P	14	C	0.00282082	0.00200566	0.0401994	0.0401564	0.00206523	0.00592339	0.000900913	0.000758257	0.000954563	0.00120788	2.07849e-15	2.78402e-15
P	14	D	1.0682e-05	8.16599e-06	0.0223921	0.0229393	9.98203e-05	0.000292302	1.29041e-05	1.14038e-05	0.0280914	0.0314529	8.66493e-15	1.13803e-14
P	14	E	0.0985217	0.0576298	0.555811	0.189127	0.0818169	0.200493	0.0106931	0.00675955	0.0905597	0.0683804	4.2034e-14	5.32623e-14
P	14	F	2.32075e-31	2.30299e-31	5.66062e-10	6.88259e-10	5.11289e-23	1.98931e-22	1.6002e-28	2.03769e-28	8.6768e-07	1.23624e-06	6.78908e-28	1.939e-27
P	14	G	0.000193847	0.000144862	0.0238544	0.0243854	9.73815e-05	0.00028576	1.01486e-05	8.9867e-06	0.0697552	0.0591142	2.35025e-17	3.30379e-17
P	14	H	8.05456e-07	6.26197e-07	5.65955e-07	6.41173e-07	0.0358518	0.0950235	0.00140147	0.00116403	0.0223205	0.0255067	3.62256e-20	5.85462e-20
P	14	I	2.77977e-08	2.17963e-08	0.0179928	0.0186306	1.01963e-10	3.30443e-10	1.38492e-08	1.29376e-08	0.00980254	0.0117341	1.38367e-16	1.9005e-16
P	14	K	0.000187267	0.000140231	0.0476427	0.0472001	2.13369e-05	6.34111e-05	8.23391e-10	7.80751e-10	0.0162407	0.0191537	2.68419e-18	3.9266e-18
P	14	L	3.16874e-29	3.09418e-29	9.52578e-13	1.21016e-12	7.92184e-19	2.88155e-18	8.60589e-47	1.90133e-46	9.60683e-07	1.36175e-06	1.63482e-07	1.75093e-07
P	14	M	0.00020312	0.000151482	0.0511549	0.0505756	3.03749e-08	9.4283e-08	0.000497192	0.000423301	0.0511126	0.0498738	1.20585e-14	1.56846e-14
P	14	N	6.05147e-11	4.90244e-11	5.83103e-06	6.51404e-06	1.32921e-06	4.07154e-06	2.62176e-69	1.41277e-68	4.68109e-14	9.8647e-14	5.21062e-36	5.02262e-35
P	14	Q	0.00280021	0.00199877	0.164829	0.120382	0.00358549	0.0102208	0.00128409	0.00107056	0.063892	0.0557655	4.51271e-12	5.33028e-12
P	14	R	0.000784617	0.000582775	1.77634e-05	1.95269e-05	0.0507514	0.132256	7.98433e-49	1.86668e-48	8.2444e-06	1.11719e-05	5.20996e-21	8.67997e-21
P	14	S	0.00110722	0.000810876	0.0390018	0.0391225	0.0119324	0.0330041	0.00638201	0.00460785	0.0570105	0.052985	0.0429393	0.0371702
P	14	T	0.0064954	0.00451321	0.112795	0.0969804	0.0272697	0.0736752	2.66531e-38	4.56478e-38	6.63364e-05	8.77466e-05	6.56024e-06	6.78388e-06
P	14	V	0.000787236	0.000583537	0.0396223	0.0396622	0.00883978	0.0245962	2.07557e-09	1.9555e-09	9.6565e-05	0.000126524	1.77091e-13	2.19753e-13
P	14	W	3.8239e-55	4.54617e-55	1.40022e-24	2.10682e-24	4.11939e-32	1.95711e-31	3.60198e-50	8.557e-50	9.64146e-18	2.96868e-17	1.25527e-08	1.37164e-08
P	14	Y	3.59743e-38	3.71069e-38	1.36617e-20	1.93468e-20	3.48146e-19	1.28647e-18	2.17811e-70	1.31841e-69	3.22674e-23	1.84368e-22	2.18313e-26	5.21435e-26
G	15	A	7.92779e-23	7.31227e-23	4.55121e-13	5.7972e-13	5.82484e-11	1.89211e-10	9.39852e-13	9.41702e-13	6.89967e-09	1.05636e-08	5.26624e-17	7.36448e-17
G	15	C	1.72471e-61	2.17027e-61	1.55693e-31	2.68688e-31	2.24986e-39	1.36634e-38	1.08312e-80	2.08084e-79	2.58876e-43	7.97097e-42	1.53736e-10	1.75446e-10
G	15	D	3.31605e-58	4.10223e-58	4.65155e-22	6.70554e-22	6.51365e-38	3.71355e-37	3.19633e-47	7.13311e-47	1.15217e-05	1.55749e-05	3.99874e-52	3.5975e-50
G	15	E	2.54195e-96	7.82187e-96	5.1212e-71	8.80636e-70	5.36794e-37	2.96359e-36	8.22305e-65	3.42666e-64	9.14977e-16	2.27404e-15	8.0784e-27	2.02822e-26
G	15	F	3.9487e-100	1.39031e-99	1.93767e-66	1.60855e-65	4.79193e-46	4.18332e-45	8.48292e-74	7.07232e-73	2.33307e-24	1.52125e-23	2.17738e-28	6.67807e-28
G	15	H	5.88616e-124	4.06674e-123	4.0863e-55	1.57399e-54	2.21159e-48	2.35811e-47	4.91099e-64	1.90352e-63	7.3968e-20	2.94932e-19	1.20537e-11	1.4053e-11
G	15	I	2.26411e-131	1.72721e-130	1.8031e-57	7.82133e-57	2.88035e-50	3.62454e-49	3.5986e-70	2.12014e-69	8.22908e-15	1.86156e-14	6.33025e-32	3.48677e-31
G	15	K	4.60659e-89	1.02855e-88	2.06472e-58	9.12045e-58	1.40324e-40	8.75012e-40	4.87363e-60	1.48517e-59	8.95895e-17	2.48267e-16	7.68055e-23	1.41018e-22
G	15	L	8.9685e-79	1.50645e-78	5.76736e-52	2.07231e-51	1.12964e-41	7.37322e-41	3.61286e-77	4.69531e-76	2.36012e-26	2.07628e-25	6.34514e-30	2.53709e-29
G	15	M	2.38628e-89	5.46125e-89	2.9038e-56	1.19857e-55	5.47117e-49	6.06513e-48	1.24227e-45	2.67765e-45	4.97176e-30	6.12337e-29	8.53687e-28	2.42535e-27
G	15	N	8.92504e-54	1.04748e-53	8.92106e-24	1.32983e-23	8.58652e-32	4.03824e-31	1.3698e-77	1.89146e-76	3.26253e-19	1.22176e-18	2.296e-33	1.51143e-32
G	15	P	0.00430647	0.00303839	0.0300151	0.0305535	0.0551239	0.14206	0.00130737	0.00108792	0.117805	0.0760085	1.27964e-13	1.59895e-13
G	15	Q	8.6658e-123	5.66644e-122	1.59823e-54	6.05924e-54	8.01299e-47	7.46164e-46	2.98388e-70	1.78173e-69	9.78173e-13	1.83775e-12	1.59192e-38	2.77196e-37
G	15	R	1.01303e-51	1.16651e-51	4.43056e-32	7.67355e-32	2.39115e-21	9.10065e-21	9.81021e-65	4.01372e-64	6.59669e-17	1.89436e-16	1.67082e-29	6.22e-29
G	15	S	0.654794	0.160919	0.593777	0.196761	0.891553	0.819781	0.158056	0.052003	0.377181	0.154278	0.263407	0.112578
G	15	T	1	0.222329	0.864322	0.262229	0.958233	0.834965	0.847834	0.233124	0.968539	0.32855	0.767673	0.266315
G	15	V	1.63104e-66	2.22853e-66	1.14231e-36	2.26339e-36	1.31278e-31	6.1533e-31	5.62648e-32	7.81812e-32	1.19197e-07	1.74309e-07	1.60874e-33	1.09923e-32
G	15	W	3.59326e-132	2.7995e-131	8.68507e-104	2.09086e-101	3.33364e-43	2.33989e-42	3.53566e-62	1.21108e-61	5.33274e-27	5.09583e-26	2.06018e-19	3.18646e-19
G	15	Y	9.14463e-148	1.2402e-146	4.56732e-52	1.66598e-51	1.25308e-73	6.03546e-72	2.17312e-65	9.50724e-65	6.84773e-20	2.75017e-19	2.64039e-25	5.56746e-25
S	16	A	0.230532	0.0911612	0.211453	0.131004	0.612582	0.778563	0.0704496	0.0262917	0.38807	0.158381	0.0907275	0.0585607
S	16	C	0.723523	0.174645	0.61799	0.201811	0.963993	0.836747	0.433661	0.130799	0.431809	0.173548	0.81595	0.279648
S	16	D	1.94146e-147	2.53898e-146	1.25731e-64	8.07169e-64	2.65471e-59	6.99635e-58	1.59241e-63	5.96302e-63	3.00743e-14	6.38627e-14	1.8861e-27	5.19442e-27
S	16	E	0.00240977	0.00172681	0.000128193	0.000138083	0.100683	0.24289	0.00632689	0.00457766	0.0612443	0.054574	3.20802e-15	4.24605e-15
S	16	F	1.83879e-102	7.08757e-102	2.62283e-71	4.67723e-70	1.04889e-43	7.83467e-43	6.61e-59	1.92154e-58	2.62769e-19	1.00438e-18	5.4171e-24	1.05184e-23
S	16	G	1.68889e-13	1.40873e-13	3.37123e-08	3.91132e-08	1.16023e-06	3.56175e-06	5.91467e-12	5.85987e-12	0.000809194	0.00102863	1.1208e-19	1.76767e-19
S	16	H	7.14967e-93	1.91098e-92	1.43301e-46	4.56935e-46	3.93795e-48	4.07444e-47	4.39942e-40	8.03291e-40	6.45325e-15	1.47186e-14	1.06645e-33	7.47613e-33
S	16	I	0.0064015	0.00445642	0.100727	0.0895489	0.0301228	0.0806039	9.76341e-21	1.08669e-20	1.684e-07	2.45612e-07	9.32604e-17	1.29746e-16
S	16	K	5.52357e-84	1.07016e-83	6.25339e-46	1.90564e-45	1.83941e-51	2.59679e-50	1.40711e-59	4.20105e-59	1.51344e-20	6.60472e-20	3.56346e-20	5.77639e-20
S	16	L	2.16291e-80	3.86345e-80	4.54929e-44	1.25166e-43	4.09648e-38	2.34505e-37	9.88526e-71	6.23997e-70	2.61575e-13	5.19619e-13	3.45578e-35	2.96097e-34
S	16	M	8.91603e-10	7.14406e-10	0.0186765	0.0192558	4.38802e-14	1.49857e-13	6.63134e-20	7.23501e-20	1.81309e-31	2.51219e-30	3.11874e-19	4.78262e-19
S	16	N	1.84104e-84	3.64402e-84	1.04078e-49	3.52902e-49	2.39228e-48	2.53145e-47	2.73236e-59	7.99565e-59	9.53666e-18	2.95281e-17	2.01798e-22	3.59503e-22
S	16	P	9.35564e-134	7.61292e-133	8.57281e-66	6.35027e-65	6.45756e-45	5.1542e-44	2.80541e-71	1.96765e-70	4.50027e-26	3.77909e-25	2.69598e-25	5.66256e-25
S	16	Q	4.25495e-37	4.34001e-37	3.78313e-24	5.65689e-24	1.52766e-14	5.24281e-14	2.27238e-17	2.3907e-17	0.0361365	0.0388895	2.62139e-26	6.17909e-26
S	16	R	2.48218e-144	2.75429e-143	6.38794e-59	2.84787e-58	1.09738e-62	3.64954e-61	1.35504e-63	5.1175e-63	7.2012e-27	6.76465e-26	1.67692e-19	2.61616e-19
S	16	T	0.738746	0.177152	0.684296	0.218198	0.928635	0.828326	0.110068	0.0381755	0.280163	0.123235	0.237496	0.104567
S	16	V	0.744671	0.17811	0.820333	0.251098	0.514711	0.77067	0.68839	0.195111	0.758196	0.269889	0.823499	0.281699
S	16	W	1.57014e-99	5.42403e-99	4.61619e-64	2.77828e-63	8.69345e-50	1.0468e-48	3.56902e-61	1.15958e-60	7.15697e-17	2.02379e-16	1.78866e-21	3.04577e-21
S	16	Y	3.81738e-149	6.35379e-148	1.27145e-84	1.22437e-82	1.04685e-80	6.09264e-79	2.59759e-33	3.76325e-33	8.31109e-13	1.58292e-12	9.1574e-29	3.07026e-28
Q	17	A	0.191082	0.0834959	0.197049	0.127884	0.526687	0.77067	4.6739e-08	4.32965e-08	0.134594	0.0815262	2.13229e-08	2.3159e-08
Q	17	C	0.740887	0.177549	0.608182	0.199612	1	0.838913	0.407558	0.123686	0.582808	0.221544	0.541173	0.199265
Q	17	D	0.479864	0.130546	1.94258e-06	2.18023e-06	0.000473124	0.00137678	5.62244e-05	4.87133e-05	0.00076589	0.000975821	3.40785e-14	4.36946e-14
Q	17	E	0.822081	0.191285	1	0.290401	0.770333	0.793209	0.911874	0.247658	0.953386	0.32437	0.926559	0.311233
Q	17	F	4.83037e-37	4.91324e-37	1.15858e-15	1.52832e-15	4.11127e-23	1.60407e-22	3.65281e-19	3.93673e-19	8.08574e-30	9.74214e-29	1.07838e-20	1.78559e-20
Q	17	G	0.866507	0.199045	0.627342	0.203999	0.865632	0.810132	0.872504	0.239015	0.938146	0.32076	0.703363	0.247666
Q	17	H	0.174576	0.0805257	0.361205	0.149288	0.332226	0.681424	0.154922	0.051124	0.674186	0.248773	0.0634228	0.0478829
Q	17	I	9.37266e-29	9.12778e-29	1.82828e-12	2.2984e-12	5.78395e-18	2.08759e-17	3.11076e-07	2.85769e-07	0.0275988	0.0309639	6.13554e-18	8.78497e-18
Q	17	K	0.479812	0.130546	0.479537	0.173081	0.731173	0.789865	0.0225411	0.0116855	0.108821	0.0732836	0.105682	0.0632925
Q	17	L	0.286039	0.101156	0.702742	0.222445	0.294226	0.626481	1.33866e-06	1.20963e-06	0.54105	0.208822	3.18721e-09	3.52549e-09
Q	17	M	0.591559	0.149699	0.366435	0.15054	0.92824	0.828326	0.151145	0.0500645	0.43897	0.175662	0.208185	0.0956403
Q	17	N	0.0714431	0.043674	0.116525	0.0996533	0.000596571	0.0017324	0.351741	0.108083	0.526785	0.203742	0.494434	0.1856
Q	17	P	1.046e-163	2.94632e-162	5.38943e-81	4.32488e-79	2.41746e-84	1.60794e-82	1.90248e-60	5.96204e-60	1.81491e-17	5.49664e-17	4.07279e-27	1.07768e-26
Q	17	R	0.186089	0.0828969	0.38729	0.154622	0.323032	0.67144	9.01767e-24	1.05974e-23	5.29027e-25	3.85796e-24	0.0495903	0.0410562
Q	17	S	0.903097	0.205788	0.678719	0.21685	0.575923	0.778563	0.222442	0.0712248	0.25147	0.114428	0.647689	0.231843
Q	17	T	0.443727	0.124794	0.533419	0.184507	0.609012	0.778563	0.701169	0.198351	0.787301	0.278639	0.780503	0.269726
Q	17	V	2.99128e-16	2.60175e-16	2.08033e-07	2.3792e-07	3.85058e-12	1.2715e-11	0.00374237	0.00292162	0.0233215	0.0264868	0.0697435	0.0507375
Q	17	W	5.23449e-40	5.4921e-40	1.26082e-11	1.57679e-11	3.0968e-30	1.40441e-29	3.4528e-38	5.89066e-38	0.000312017	0.000401231	3.52322e-06	3.68569e-06
Q	17	Y	5.34252e-17	4.68015e-17	1.84431e-10	2.27111e-10	5.52401e-08	1.71084e-07	0.000539742	0.000458643	0.136065	0.0819693	0.00288067	0.00283754
P	18	A	3.84939e-19	3.43794e-19	1.89989e-05	2.08375e-05	3.81541e-15	1.32241e-14	5.51251e-05	4.78547e-05	0.0192523	0.0223695	2.79792e-16	3.83326e-16
P	18	C	2.71561e-59	3.39382e-59	1.28493e-27	2.06225e-27	1.52408e-33	7.57589e-33	1.95244e-13	1.97872e-13	1.5558e-05	2.09291e-05	6.35903e-20	1.01857e-19
P	18	D	3.2921e-88	7.17552e-88	2.78906e-53	1.041e-52	9.37299e-50	1.11898e-48	3.99333e-75	3.92117e-74	1.23016e-25	9.88108e-25	4.3297e-30	1.77057e-29
P	18	E	1.60646e-91	4.08504e-91	5.47885e-49	1.83193e-48	2.86354e-54	4.87777e-53	4.7235e-64	1.84749e-63	4.28069e-28	4.47642e-27	1.54869e-09	1.72366e-09
P	18	F	1.45395e-97	4.68119e-97	9.15384e-56	3.55438e-55	7.71214e-55	1.39899e-53	2.5323e-59	7.45963e-59	1.73499e-11	2.9956e-11	4.97907e-27	1.3047e-26
P	18	G	1.0769e-67	1.49369e-67	1.54477e-32	2.71454e-32	6.14937e-37	3.38164e-36	7.88215e-59	2.27638e-58	9.55629e-19	3.46171e-18	1.60503e-19	2.51625e-19
P	18	H	9.56779e-120	6.04051e-119	2.79774e-63	1.56636e-62	4.44823e-71	1.94164e-69	1.22239e-24	1.45198e-24	2.16503e-10	3.58188e-10	1.161e-23	2.22235e-23
P	18	I	2.52536e-84	4.91876e-84	4.85881e-41	1.15244e-40	3.93323e-45	3.19413e-44	2.78347e-40	5.12469e-40	6.00332e-14	1.25084e-13	1.8376e-30	7.87245e-30
P	18	K	1.80808e-63	2.34778e-63	1.86676e-31	3.19864e-31	8.51076e-34	4.27616e-33	5.82634e-136	8.58158e-134	1.26972e-79	2.34575e-77	1.59614e-35	1.46032e-34
P	18	L	1.04505e-91	2.69488e-91	5.84686e-21	8.32892e-21	3.98732e-73	1.79659e-71	1.21272e-58	3.45719e-58	5.72026e-40	1.26814e-38	1.19662e-08	1.3102e-08
P	18	M	9.39912e-45	1.03667e-44	8.53171e-25	1.29586e-24	1.06531e-21	4.0656e-21	1.39093e-22	1.60892e-22	6.56868e-10	1.04614e-09	1.26024e-25	2.74303e-25
P	18	N	1.61875e-76	2.61123e-76	9.0735e-35	1.6999e-34	1.44722e-43	1.06393e-42	6.76192e-41	1.26071e-40	1.36327e-16	3.6857e-16	1.32305e-31	6.93373e-31
P	18	Q	4.9973e-42	5.36625e-42	5.42119e-15	7.093e-15	9.38622e-29	4.13583e-28	3.90459e-27	4.84639e-27	3.86806e-15	9.08394e-15	2.61693e-28	7.93597e-28
P	18	R	3.79585e-83	7.2018e-83	8.01913e-49	2.66282e-48	5.7824e-49	6.35969e-48	1.67405e-54	4.37699e-54	2.39584e-20	1.00595e-19	4.62702e-08	4.98532e-08
P	18	S	1.496e-23	1.38683e-23	2.57522e-13	3.28893e-13	7.60434e-17	2.7305e-16	5.29261e-10	5.05105e-10	3.31153e-08	4.97388e-08	6.61377e-15	8.72881e-15
P	18	T	3.17053e-10	2.55721e-10	3.36569e-05	3.67467e-05	7.80214e-05	0.000229431	0.00275838	0.00222011	0.0212571	0.0243417	0.0557591	0.0451252
P	18	V	7.49067e-51	8.54488e-51	1.39799e-16	1.87496e-16	3.79777e-36	2.01699e-35	1.68011e-25	2.02285e-25	0.000266215	0.000343928	5.28139e-23	9.8646e-23
P	18	W	3.93328e-156	7.58039e-155	2.12013e-64	1.30873e-63	1.2009e-93	1.29031e-91	4.81935e-76	5.07027e-75	1.0013e-46	3.69968e-45	2.19542e-28	6.69535e-28
P	18	Y	5.39495e-105	2.43889e-104	6.06773e-37	1.2173e-36	7.19121e-70	2.9543e-68	4.09567e-65	1.75703e-64	8.42483e-15	1.89041e-14	3.64718e-28	1.08769e-27
K	19	A	0.214354	0.0884833	0.18328	0.125932	0.640756	0.784206	0.00280725	0.00225124	0.0448109	0.0457379	0.0269464	0.0254293
K	19	C	0.681471	0.166248	0.696377	0.221141	0.810622	0.80019	0.191334	0.0619827	0.420393	0.169452	0.297117	0.123087
K	19	D	0.152783	0.0757963	0.141205	0.110421	0.537246	0.771249	0.112054	0.0386518	0.211826	0.102266	0.33715	0.136222
K	19	E	0.351613	0.110465	0.485965	0.173906	0.516806	0.77067	0.0351681	0.0159545	0.190219	0.0964946	0.09572	0.0602907
K	19	F	0.744688	0.17811	0.470158	0.171365	0.844635	0.80424	0.0851269	0.0308571	0.253282	0.114687	0.196979	0.0922191
K	19	G	0.451495	0.126011	0.415048	0.158979	0.763708	0.793209	0.0285588	0.0139285	0.124987	0.0782978	0.124862	0.0695563
K	19	H	0.378576	0.114296	0.366874	0.150592	0.679951	0.785994	0.0614427	0.0238815	0.145711	0.084862	0.253926	0.109918
K	19	I	0.51572	0.136844	0.212005	0.131004	1	0.838913	0.0442514	0.0187832	0.220218	0.10422	0.103043	0.0626378
K	19	L	2.30826e-27	2.21845e-27	0.339713	0.145135	3.75947e-29	1.66704e-28	0.0243212	0.0123242	0.116983	0.0759204	0.107274	0.0633547
K	19	M	0.47736	0.130252	0.485435	0.173906	0.731144	0.789865	4.09374e-16	4.22639e-16	0.124042	0.0780206	1.00609e-16	1.39252e-16
K	19	N	0.399499	0.117404	0.289504	0.138614	0.837373	0.803292	0.0770585	0.0284221	0.163033	0.0891961	0.28413	0.118985
K	19	P	8.36112e-05	6.32571e-05	3.56277e-05	3.87228e-05	0.340355	0.687	0.0215774	0.0112566	0.100988	0.0714824	0.116112	0.0668039
K	19	Q	0.0922805	0.0548554	0.0787447	0.0730527	0.508829	0.768726	0.00602671	0.00443096	0.0591211	0.053761	0.0468817	0.0398023
K	19	R	0.287853	0.101156	0.326717	0.143286	0.572522	0.778563	0.00799624	0.00544449	0.0704474	0.0592644	0.0573526	0.0459327
K	19	S	0.38311	0.114894	0.304644	0.141286	0.792318	0.796762	0.0622843	0.0240635	0.179767	0.0941711	0.198274	0.0926643
K	19	T	0.276347	0.0993355	0.362335	0.149365	0.498462	0.765105	0.0421009	0.0180437	0.129257	0.0796355	0.185335	0.0883771
K	19	V	0.187381	0.0830386	0.265574	0.134884	0.425324	0.752633	1.48851e-06	1.34229e-06	0.217101	0.103194	5.78468e-07	6.14674e-07
K	19	W	8.90934e-15	7.64025e-15	7.91141e-19	1.09776e-18	0.825483	0.803292	0.245474	0.0776984	0.418223	0.168945	0.434974	0.167234
K	19	Y	0.472653	0.129765	0.257856	0.134366	0.907036	0.825992	0.157998	0.052003	0.324358	0.137229	0.323738	0.132388
T	20	A	0.491087	0.132321	0.905735	0.271044	0.440222	0.761012	0.417144	0.126335	0.784731	0.278001	0.327085	0.13334
T	20	C	0.0408028	0.026351	0.296938	0.139757	0.0713401	0.176679	0.452549	0.135847	0.572383	0.218631	0.627695	0.226488
T	20	D	0.903123	0.205788	0.499131	0.17632	0.650823	0.785994	0.402295	0.122425	0.650072	0.240764	0.465246	0.176609
T	20	E	0.848136	0.195637	0.646492	0.208072	0.902387	0.825082	0.539165	0.158569	0.636677	0.238102	0.697462	0.24607
T	20	F	0.689952	0.167536	0.8525	0.259132	0.478011	0.765105	0.642932	0.184475	0.620194	0.232809	0.885937	0.29964
T	20	G	0.159336	0.0768786	0.712215	0.224866	0.115805	0.277929	0.587629	0.170546	0.692461	0.25299	0.686677	0.243007
T	20	H	0.0290051	0.0191714	0.285863	0.138333	0.0485574	0.12725	0.0132848	0.00793263	0.22835	0.106801	0.00249428	0.00247046
T	20	I	0.790666	0.185917	0.514766	0.179925	0.831396	0.803292	1	0.265705	0.856167	0.298243	0.786272	0.271372
T	20	K	0.155381	0.0762863	0.450119	0.167643	0.224965	0.505191	0.54415	0.159869	1	0.333675	0.325972	0.132999
T	20	L	0.276217	0.0993355	0.886767	0.26702	0.181138	0.417511	0.548148	0.160723	0.721644	0.260221	0.611185	0.221419
T	20	M	0.105867	0.0607615	0.487089	0.173906	0.118406	0.283685	0.531455	0.15666	0.728123	0.261536	0.571033	0.209309
T	20	N	0.727554	0.175272	0.859586	0.261121	0.547762	0.7744	1	0.265705	0.817626	0.287072	0.83293	0.284135
T	20	P	5.57707e-18	4.92094e-18	8.02357e-06	8.90144e-06	1.14828e-13	3.89298e-13	4.88977e-05	4.25321e-05	0.0141386	0.0168518	2.19741e-14	2.83768e-14
T	20	Q	0.988794	0.221587	0.597892	0.197717	0.798529	0.799094	0.302566	0.0942416	0.369852	0.152066	0.637559	0.22913
T	20	R	0.388656	0.11533	1	0.290401	0.236188	0.526165	0.144506	0.0482998	0.429303	0.172791	0.17479	0.0853081
T	20	S	0.402561	0.117738	0.503049	0.177428	0.594803	0.778563	0.0401381	0.0174565	0.146908	0.0849857	0.153246	0.0784555
T	20	V	0.509388	0.135458	0.555428	0.189127	0.744897	0.793209	0.575492	0.167739	0.744553	0.265837	0.642982	0.230464
T	20	W	0.0631638	0.0393351	0.204003	0.128734	0.182338	0.419584	0.10115	0.0355286	0.370784	0.152336	0.138272	0.0736809
T	20	Y	0.183956	0.0824601	0.565197	0.191105	0.20689	0.468366	0.690409	0.195557	0.697199	0.254218	0.90117	0.304219
A	21	C	0.64314	0.158695	0.550522	0.188007	0.918319	0.826789	0.294168	0.091991	0.492967	0.192679	0.424944	0.163728
A	21	D	0.190371	0.0834711	0.348391	0.147337	0.357604	0.698643	0.104864	0.0366436	0.229515	0.107058	0.288228	0.120421
A	21	E	0.000955087	0.000705101	0.000209352	0.000223999	0.567625	0.778563	0.110275	0.0382173	0.263087	0.117685	0.268143	0.113791
A	21	F	0.844098	0.195132	1	0.290401	0.831474	0.803292	1.54035e-08	1.43291e-08	1.7279e-11	2.9927e-11	0.56326	0.206833
A	21	G	0.403287	0.117772	0.334661	0.144267	0.796656	0.798823	0.115095	0.0394546	0.236201	0.109147	0.307758	0.126814
A	21	H	0.838811	0.194032	0.867157	0.262758	0.670719	0.785994	6.29035e-26	7.72084e-26	8.13878e-31	1.10019e-29	1	0.327347
A	21	I	0.72679	0.175203	0.449078	0.167643	0.83847	0.803292	0.223161	0.0714031	0.407013	0.165019	0.370761	0.146512
A	21	K	0.390872	0.115706	0.519594	0.181015	0.547155	0.7744	0.0323001	0.0150871	0.195187	0.0981664	0.0826689	0.0552965
A	21	L	0.472742	0.129765	0.589236	0.196162	0.613797	0.778563	3.31878e-36	5.23736e-36	0.23632	0.109147	2.36698e-39	5.11075e-38
A	21	M	0.794453	0.186382	0.548212	0.187869	0.844666	0.80424	0.0461139	0.019333	0.109805	0.0735944	0.282876	0.118644
A	21	N	0.425471	0.121812	0.428326	0.162388	0.7071	0.785994	0.12625	0.0428463	0.180623	0.0944892	0.477412	0.179836
A	21	P	1.14063e-14	9.7587e-15	8.11946e-21	1.15321e-20	0.360231	0.70079	0.0023183	0.001897	0.028848	0.0320411	0.0372147	0.0335364
A	21	Q	4.71568e-32	4.69231e-32	3.00326e-36	5.80732e-36	0.716312	0.785994	0.0301452	0.0144344	0.125026	0.0782978	0.124283	0.0694644
A	21	R	0.621565	0.154621	0.465533	0.170584	1	0.838913	0.040862	0.0176709	0.136003	0.0819693	0.168456	0.0828911
A	21	S	0.316711	0.105772	0.259341	0.134709	0.738658	0.793209	0.0680466	0.0256331	0.206918	0.100669	0.187079	0.0887594
A	21	T	4.61258e-30	4.55261e-30	3.88096e-34	7.07812e-34	0.960646	0.835642	0.0853599	0.0309107	0.277983	0.122665	0.179062	0.0868433
A	21	V	0.812082	0.189646	0.957926	0.282961	0.803791	0.799094	0.274109	0.0862678	0.470351	0.185562	0.413925	0.160629
A	21	W	0.603882	0.152448	0.898218	0.269625	0.425213	0.752633	1	0.265705	0.643424	0.239334	0.512087	0.190242
A	21	Y	0.832799	0.193129	0.871468	0.263236	0.852886	0.806163	0.650753	0.186115	0.578616	0.220102	1	0.327347
C	22	A	2.1359e-75	3.4005e-75	3.61972e-41	8.67084e-41	5.56158e-36	2.92043e-35	6.01685e-18	6.39099e-18	2.99289e-10	4.92214e-10	1.75844e-24	3.52862e-24
C	22	D	8.326e-62	1.0513e-61	1.62226e-27	2.595e-27	5.19638e-36	2.74934e-35	3.42803e-35	5.25951e-35	9.26e-17	2.55333e-16	9.50095e-32	5.02801e-31
C	22	E	1.19518e-83	2.30341e-83	1.09839e-41	2.75447e-41	8.64712e-44	6.52876e-43	2.25313e-60	6.96214e-60	1.04482e-15	2.56228e-15	2.16107e-22	3.83729e-22
C	22	F	7.17288e-97	2.2449e-96	8.66033e-65	5.79141e-64	8.85197e-51	1.16645e-49	5.39817e-75	5.18539e-74	5.23608e-21	2.3787e-20	3.95582e-31	1.92372e-30
C	22	G	6.90564e-82	1.27711e-81	4.63542e-52	1.67811e-51	4.27922e-44	3.3392e-43	1.1225e-35	1.74647e-35	2.22992e-10	3.67826e-10	1.41543e-27	3.95876e-27
C	22	H	3.95641e-37	4.04677e-37	6.42523e-19	8.94119e-19	6.58863e-20	2.47391e-19	3.01306e-18	3.21588e-18	3.16803e-10	5.19476e-10	9.69491e-17	1.34531e-16
C	22	I	1.18528e-150	2.06676e-149	2.46633e-69	2.96875e-68	2.09291e-56	4.23674e-55	7.62229e-67	3.66092e-66	3.3061e-18	1.07786e-17	3.46886e-25	7.20183e-25
C	22	K	3.45861e-138	2.94525e-137	1.14755e-59	5.26217e-59	1.32479e-57	2.9846e-56	7.99218e-103	5.04498e-101	4.72803e-25	3.54113e-24	4.52564e-59	6.1073e-57
C	22	L	2.09262e-90	5.07463e-90	1.72243e-45	5.05684e-45	9.2976e-47	8.60052e-46	2.65873e-172	5.87403e-170	7.62711e-122	2.1136e-119	2.11364e-28	6.5196e-28
C	22	M	2.36937e-93	6.47467e-93	1.58813e-43	4.29583e-43	1.27555e-51	1.85591e-50	7.0841e-70	4.01929e-69	2.21916e-21	1.04231e-20	3.41944e-29	1.21434e-28
C	22	N	2.50891e-125	1.76674e-124	2.1646e-40	4.89307e-40	9.16451e-87	6.73731e-85	1.75428e-63	6.46951e-63	5.95432e-13	1.1419e-12	2.55882e-25	5.43795e-25
C	22	P	3.79486e-89	8.52508e-89	1.1946e-40	2.73895e-40	2.99963e-50	3.74094e-49	3.63372e-126	4.01406e-124	2.20868e-69	1.74875e-67	3.01202e-33	1.95888e-32
C	22	Q	1.96725e-104	8.5757e-104	2.25133e-69	2.77944e-68	1.23126e-54	2.17697e-53	1.56478e-41	3.03258e-41	8.25463e-25	5.86538e-24	8.17421e-27	2.04278e-26
C	22	R	4.03949e-104	1.70019e-103	1.07394e-66	9.23369e-66	1.89273e-53	3.00425e-52	2.43348e-69	1.3275e-68	1.1764e-14	2.57707e-14	2.28112e-32	1.29614e-31
C	22	S	1.35772e-110	7.31127e-110	5.77884e-67	5.15263e-66	5.15586e-62	1.53227e-60	2.28972e-77	3.06592e-76	4.69607e-29	5.31167e-28	5.96321e-26	1.34683e-25
C	22	T	4.60848e-102	1.72195e-101	1.11624e-61	5.77904e-61	3.93923e-55	7.43551e-54	1.29513e-70	8.0602e-70	3.77677e-15	8.90729e-15	1.51034e-29	5.66163e-29
C	22	V	1.46335e-178	7.65493e-177	1.11429e-67	1.07303e-66	4.6273e-86	3.23168e-84	2.50857e-93	1.38557e-91	5.17162e-25	3.82171e-24	2.13386e-49	1.6455e-47
C	22	W	9.21092e-101	3.30669e-100	7.49884e-56	2.93543e-55	1.56221e-59	4.19631e-58	1.13491e-83	3.85754e-82	6.45147e-26	5.33675e-25	1.027e-34	8.39951e-34
C	22	Y	7.95118e-167	2.42628e-165	1.90047e-77	7.03883e-76	2.30065e-64	8.03379e-63	1.22554e-85	4.92297e-84	8.49705e-32	1.2393e-30	1.5116e-31	7.84573e-31
T	23	A	0.161993	0.0776414	0.343709	0.146105	0.31358	0.658178	0.456363	0.136806	0.713332	0.258063	0.46282	0.176059
T	23	C	0.600032	0.151739	0.800905	0.24609	0.635094	0.781747	0.853853	0.234342	0.739846	0.264718	1	0.327347
T	23	D	0.0499541	0.0318676	0.54141	0.18601	0.0277221	0.0744654	0.0521144	0.0211651	0.0597829	0.0540406	0.377543	0.148539
T	23	E	0.181999	0.08217	0.510842	0.179294	0.245288	0.543834	0.0500936	0.0206453	0.17106	0.0917939	0.161583	0.0810612
T	23	F	4.34402e-42	4.67846e-42	1.64898e-18	2.27496e-18	3.39733e-26	1.41231e-25	4.97967e-47	1.10571e-46	1.85945e-06	2.58289e-06	3.28184e-19	5.01847e-19
T	23	G	0.943738	0.212923	0.46291	0.170141	0.510787	0.770076	0.121018	0.0412607	0.309538	0.132374	0.239571	0.105309
T	23	H	7.7908e-14	6.54313e-14	1.8756e-08	2.20801e-08	1.61208e-09	5.11758e-09	4.79224e-33	6.83077e-33	0.00433545	0.0053755	8.80427e-41	2.50132e-39
T	23	I	0.0244393	0.0163304	0.000625036	0.000664338	0.0343078	0.0911042	0.00291149	0.00232219	0.102003	0.0718472	1.0923e-14	1.4242e-14
T	23	K	0.849792	0.195772	0.747651	0.233755	0.580737	0.778563	0.910764	0.247654	0.888816	0.307306	1	0.327347
T	23	L	0.206283	0.0869917	0.768226	0.238484	0.142043	0.334014	0.130866	0.0441752	0.556936	0.214059	0.0604119	0.0472794
T	23	M	0.0374591	0.0244068	0.38596	0.154475	0.146395	0.343669	0.0200897	0.0106567	0.15246	0.0860736	0.000876393	0.00087606
T	23	N	0.320659	0.10655	0.480699	0.173347	0.478161	0.765105	0.0968362	0.0342585	0.125194	0.0783146	0.471873	0.178372
T	23	P	0.735364	0.176572	0.920778	0.274855	0.730313	0.789865	1	0.265705	1	0.333675	0.931807	0.312802
T	23	Q	0.000900783	0.000666354	0.431475	0.163178	4.32391e-06	1.30727e-05	0.302644	0.0942416	0.620424	0.232809	0.274993	0.116241
T	23	R	0.766658	0.181939	1	0.290401	0.717866	0.785994	0.594828	0.172351	0.5221	0.202353	0.933805	0.313277
T	23	S	0.17005	0.0792217	0.292433	0.139347	0.370159	0.712168	0.00508365	0.00383328	0.0489047	0.0483271	0.0483804	0.040481
T	23	V	0.0515464	0.0328262	0.508937	0.178893	0.0324233	0.0864286	0.0123862	0.00750764	0.0515478	0.050122	0.120044	0.0681382
T	23	W	3.09699e-27	2.96095e-27	4.70018e-15	6.16639e-15	4.22145e-13	1.41742e-12	3.58257e-50	8.55688e-50	7.64016e-10	1.2133e-09	5.9856e-09	6.60736e-09
T	23	Y	1.05407e-19	9.46021e-20	2.4331e-09	2.92875e-09	7.91376e-12	2.60091e-11	2.18227e-11	2.14284e-11	1.63985e-06	2.28357e-06	5.50489e-16	7.46611e-16
N	24	A	0.404221	0.117772	0.550039	0.188007	0.53851	0.771472	0.037398	0.0166247	0.167881	0.0909536	0.119771	0.0681382
N	24	C	0.554773	0.143261	1	0.290401	0.418584	0.74671	0.653177	0.186566	0.885665	0.306408	0.57697	0.210902
N	24	D	0.200328	0.0852967	0.487679	0.173906	0.285981	0.613603	3.22007e-71	2.22319e-70	1.84614e-65	1.27899e-63	1.2339e-17	1.75278e-17
N	24	E	0.48112	0.130684	0.799611	0.24585	0.503326	0.765857	0.0343783	0.0157253	0.202934	0.0999648	3.84744e-13	4.70936e-13
N	24	F	0.119232	0.0658227	0.685291	0.21837	0.16858	0.393106	0.00576028	0.00424922	0.0529381	0.0506737	0.00329435	0.00323911
N	24	G	0.822736	0.191285	0.70158	0.222237	1	0.838913	0.411335	0.124661	0.458464	0.182278	0.720316	0.252811
N	24	H	0.615138	0.153743	0.512602	0.179629	0.909871	0.825992	0.33347	0.102898	0.683783	0.250977	0.330837	0.134375
N	24	I	0.232538	0.0915546	0.531036	0.183947	0.306825	0.64641	0.0377857	0.0167802	0.279366	0.123079	2.24771e-14	2.89571e-14
N	24	K	0.438404	0.123529	0.330327	0.143286	0.847479	0.805272	0.0505782	0.0207233	0.142145	0.0839299	0.196314	0.0921272
N	24	L	0.00715688	0.00494468	0.185346	0.126583	0.00335835	0.00961251	0.00904953	0.0059682	0.22941	0.107058	5.31787e-19	8.01833e-19
N	24	M	0.850078	0.195772	0.580486	0.194858	0.821472	0.802955	0.361946	0.110833	0.710026	0.257371	0.294913	0.122456
N	24	P	0.207179	0.0872002	0.259663	0.134709	0.484023	0.765105	0.0645188	0.0247149	0.226547	0.106432	0.168428	0.0828911
N	24	Q	0.836423	0.193724	0.409973	0.15817	0.596902	0.778563	1.9619e-06	1.76199e-06	0.718713	0.259332	5.1057e-08	5.49011e-08
N	24	R	0.266494	0.0975837	0.189837	0.127221	0.773594	0.793209	0.00696546	0.00491795	0.0370257	0.0394012	0.0907379	0.0585607
N	24	S	0.12434	0.0677718	0.12039	0.101516	0.491394	0.765105	0.0209986	0.0110328	0.112121	0.0742429	0.0972933	0.0606113
N	24	T	0.327222	0.107192	0.198937	0.127884	0.866475	0.810132	0.0150565	0.00875239	0.0522975	0.0505807	0.156021	0.0793028
N	24	V	0.845611	0.195358	0.902046	0.270605	0.712973	0.785994	0.821308	0.227387	0.88456	0.306408	0.571165	0.209309
N	24	W	1.87625e-16	1.63581e-16	1.50169e-05	1.65455e-05	6.63059e-12	2.18433e-11	3.37623e-50	8.10786e-50	9.53829e-13	1.79811e-12	5.22905e-19	7.90649e-19
N	24	Y	0.155624	0.0762863	0.180997	0.125032	0.428782	0.752633	0.0638669	0.0245185	0.466963	0.184862	1.90654e-18	2.80421e-18
C	25	A	6.46681e-214	4.73598e-212	4.57966e-74	1.16055e-72	2.78129e-118	7.76975e-116	4.72464e-64	1.84749e-63	8.70376e-22	4.30706e-21	6.51595e-23	1.20869e-22
C	25	D	4.28917e-94	1.19893e-93	2.9125e-56	1.19857e-55	1.30529e-39	7.99654e-39	2.90352e-34	4.31978e-34	1.51138e-17	4.60251e-17	7.41164e-27	1.86952e-26
C	25	E	1.53738e-109	8.1587e-109	2.82273e-76	9.06068e-75	3.79399e-48	3.95478e-47	1.22571e-75	1.25954e-74	4.82888e-20	1.98246e-19	8.27327e-31	3.83066e-30
C	25	F	1.82681e-123	1.23876e-122	8.45571e-46	2.56056e-45	2.49418e-79	1.33994e-77	2.0514e-37	3.39494e-37	4.11089e-13	7.99435e-13	2.19341e-31	1.11698e-30
C	25	G	1.64896e-177	7.54765e-176	1.14339e-89	1.83509e-87	6.65107e-64	2.26589e-62	4.00114e-73	3.10171e-72	5.0474e-27	4.90778e-26	1.05809e-25	2.32175e-25
C	25	H	1.18756e-91	3.04094e-91	2.61195e-37	5.35155e-37	3.44395e-56	6.8721e-55	1.29187e-31	1.76184e-31	8.51711e-13	1.6166e-12	8.74691e-30	3.39679e-29
C	25	I	2.0992e-84	4.11057e-84	6.68646e-44	1.81889e-43	2.7663e-42	1.86664e-41	1.12667e-45	2.44038e-45	1.72324e-18	5.93216e-18	9.94289e-38	1.49087e-36
C	25	K	1.9027e-92	5.04873e-92	3.31831e-66	2.57696e-65	5.35411e-44	4.1091e-43	4.27851e-31	5.78146e-31	5.36708e-14	1.1225e-13	1.20588e-24	2.45633e-24
C	25	L	6.2815e-90	1.48396e-89	1.65544e-65	1.18966e-64	9.12892e-42	6.0147e-41	1.51778e-71	1.08171e-70	8.95439e-25	6.28205e-24	8.30419e-26	1.83712e-25
C	25	M	1.5268e-103	6.07693e-103	6.1548e-71	9.87814e-70	1.24076e-51	1.82429e-50	1.04275e-33	1.52065e-33	1.01163e-08	1.52773e-08	4.27884e-36	4.27721e-35
C	25	N	1.44555e-90	3.52884e-90	2.88764e-59	1.2994e-58	9.82911e-46	8.37146e-45	1.77454e-76	1.91247e-75	2.02319e-23	1.20572e-22	1.26774e-30	5.56356e-30
C	25	P	1.06021e-238	1.29408e-236	5.55676e-71	9.22585e-70	3.4493e-142	1.60598e-139	3.6625e-53	9.24766e-53	2.08251e-12	3.84732e-12	2.28753e-22	4.04852e-22
C	25	Q	4.90931e-105	2.24709e-104	1.29382e-59	5.87692e-59	1.52063e-57	3.37143e-56	5.81051e-68	2.95113e-67	4.41607e-21	2.02275e-20	2.86597e-26	6.72625e-26
C	25	R	1.19057e-163	3.11398e-162	5.98731e-70	8.23657e-69	6.4217e-71	2.71811e-69	1.49038e-76	1.64637e-75	1.04935e-34	1.81746e-33	4.35516e-12	5.15547e-12
C	25	S	6.08381e-113	3.48085e-112	4.48851e-74	1.16055e-72	1.38544e-56	2.88831e-55	1.97548e-78	2.90967e-77	1.66107e-25	1.29665e-24	3.64778e-30	1.5264e-29
C	25	T	9.29113e-85	1.86933e-84	1.19927e-42	3.08787e-42	6.58904e-44	5.02923e-43	6.38787e-71	4.15088e-70	2.52532e-16	6.57096e-16	2.66865e-31	1.33382e-30
C	25	V	1.56633e-154	2.86776e-153	9.07311e-70	1.21349e-68	2.68948e-62	8.34809e-61	5.52041e-66	2.51474e-65	6.86818e-22	3.42935e-21	4.23551e-26	9.64688e-26
C	25	W	7.68803e-127	5.51995e-126	4.2005e-64	2.5601e-63	1.34882e-79	7.53608e-78	3.43754e-73	2.76171e-72	5.11257e-23	2.86218e-22	2.71214e-27	7.35679e-27
C	25	Y	1.10034e-271	4.02917e-269	5.58584e-78	2.24125e-76	5.06581e-196	7.07587e-193	9.18198e-77	1.06769e-75	1.62511e-24	1.07225e-23	4.29557e-30	1.77002e-29
Y	26	A	7.25657e-41	7.70198e-41	5.98329e-11	7.4249e-11	7.26958e-32	3.43043e-31	1.46109e-61	4.81797e-61	1.25018e-16	3.39653e-16	3.74596e-23	7.04547e-23
Y	26	C	0.027201	0.0180441	0.213103	0.131004	0.0697773	0.173116	6.97598e-11	6.8196e-11	0.000153891	0.000200215	1.50699e-05	1.55538e-05
Y	26	D	1.65691e-115	1.0112e-114	2.67576e-61	1.35615e-60	8.52093e-67	3.30609e-65	8.29779e-65	3.42666e-64	2.25304e-26	2.01405e-25	1.73698e-11	2.01638e-11
Y	26	E	3.53264e-107	1.74806e-106	1.99105e-70	2.90504e-69	1.20116e-52	1.80406e-51	5.93278e-71	3.91269e-70	3.45644e-27	3.42084e-26	1.93378e-24	3.85182e-24
Y	26	F	0.13902	0.0725156	0.166179	0.120501	0.449355	0.765105	0.0175671	0.00972225	0.0797567	0.063477	0.11252	0.0655188
Y	26	G	2.58513e-62	3.2983e-62	4.05681e-29	6.66653e-29	5.59685e-35	2.88473e-34	1.85483e-69	1.02449e-68	1.146e-13	2.34374e-13	1.13281e-30	5.05359e-30
Y	26	H	0.769733	0.182501	0.895998	0.269126	0.809742	0.80019	0.782165	0.21804	1	0.333675	0.666065	0.236913
Y	26	I	2.2624e-55	2.69849e-55	1.6098e-20	2.273e-20	9.33729e-37	5.1146e-36	1.4037e-56	3.95065e-56	1.76516e-16	4.70343e-16	9.51989e-20	1.51141e-19
Y	26	K	4.96276e-20	4.47597e-20	5.00322e-09	5.99247e-09	1.29736e-12	4.30438e-12	2.64705e-44	5.54336e-44	4.30427e-15	1.00657e-14	1.1278e-06	1.18902e-06
Y	26	L	0.0181611	0.0122924	0.0419948	0.0416904	0.152557	0.357534	1.60295e-07	1.48178e-07	0.0502097	0.0493997	6.9275e-14	8.71662e-14
Y	26	M	0.926361	0.209778	0.927046	0.276056	0.852555	0.806163	0.481665	0.143612	0.710867	0.257507	0.526468	0.194395
Y	26	N	2.49376e-11	2.03375e-11	7.42794e-06	8.27879e-06	6.33737e-07	1.94977e-06	1.36879e-72	9.91517e-72	1.71032e-20	7.4056e-20	6.86361e-33	4.21016e-32
Y	26	P	1.09881e-18	9.7897e-19	1.0272e-12	1.30153e-12	5.66774e-07	1.7476e-06	2.3159e-39	4.10973e-39	8.62351e-12	1.53187e-11	4.22895e-05	4.31525e-05
Y	26	Q	0.0051851	0.00363093	0.122672	0.10305	0.0185883	0.0509098	4.14495e-34	6.10507e-34	1.937e-06	2.68387e-06	0.000920129	0.00091808
Y	26	R	0.000645434	0.000480371	0.0416967	0.0414801	0.0200046	0.0546814	2.56076e-12	2.55421e-12	0.000436095	0.000559487	1.11662e-16	1.54155e-16
Y	26	S	8.3247e-22	7.58285e-22	1.60109e-10	1.97667e-10	7.52723e-13	2.5093e-12	4.09896e-29	5.29591e-29	1.2524e-11	2.20356e-11	2.53156e-27	6.90163e-27
Y	26	T	3.07639e-44	3.38289e-44	2.1116e-21	3.01692e-21	1.7396e-24	7.02269e-24	2.55828e-21	2.8911e-21	1.53413e-06	2.14173e-06	1.83268e-29	6.72976e-29
Y	26	V	5.0554e-18	4.47142e-18	5.47991e-11	6.81782e-11	1.93682e-08	6.02523e-08	5.62272e-56	1.54317e-55	1.28704e-12	2.40987e-12	1.05826e-21	1.82505e-21
Y	26	W	0.143722	0.0738114	0.174953	0.123515	0.445002	0.763605	0.00306781	0.00242498	0.0683185	0.0582529	0.0184087	0.0176814
C	27	A	4.72929e-98	1.57432e-97	3.41325e-65	2.41681e-64	1.62071e-46	1.44901e-45	1.02786e-30	1.37215e-30	8.14512e-18	2.53612e-17	7.10888e-23	1.31416e-22
C	27	D	6.30181e-104	2.56397e-103	3.03846e-63	1.68158e-62	5.63395e-58	1.3338e-56	1.7014e-38	2.92526e-38	9.34716e-16	2.31273e-15	5.23577e-28	1.5444e-27
C	27	E	9.36537e-95	2.7003e-94	4.14263e-65	2.89075e-64	1.5304e-47	1.53788e-46	7.76406e-60	2.34979e-59	3.06518e-18	1.02339e-17	8.3485e-22	1.4537e-21
C	27	F	1.77976e-80	3.19463e-80	8.12431e-41	1.8989e-40	1.57291e-41	1.01246e-40	5.9768e-42	1.16856e-41	7.40895e-17	2.07388e-16	3.59057e-35	3.02839e-34
C	27	G	3.45321e-82	6.48453e-82	2.52207e-37	5.18947e-37	1.06285e-46	9.76692e-46	4.45936e-37	7.29796e-37	4.74597e-16	1.19562e-15	3.19426e-26	7.4002e-26
C	27	H	1.88343e-96	5.84464e-96	3.47288e-40	7.70572e-40	4.13012e-58	1.01209e-56	1.40909e-23	1.65155e-23	7.3019e-12	1.30547e-11	9.33622e-26	2.057e-25
C	27	I	1.00462e-85	2.10209e-85	2.64353e-52	9.71616e-52	1.38838e-47	1.41553e-46	1.24577e-72	9.1744e-72	6.79068e-17	1.94001e-16	1.53454e-34	1.23632e-33
C	27	K	6.44325e-79	1.08727e-78	3.66509e-37	7.44593e-37	1.6102e-43	1.17141e-42	2.26581e-37	3.73578e-37	2.07254e-15	4.92993e-15	1.95207e-33	1.31715e-32
C	27	L	1.3385e-140	1.16697e-139	1.21482e-63	7.22121e-63	1.96457e-55	3.81124e-54	3.91674e-62	1.33129e-61	3.80385e-25	2.88798e-24	2.78188e-20	4.5367e-20
C	27	M	1.06366e-145	1.29829e-144	6.0029e-41	1.4099e-40	1.17208e-106	2.33879e-104	3.61098e-42	7.15506e-42	4.39031e-14	9.28724e-14	6.15945e-39	1.1465e-37
C	27	N	9.19934e-75	1.44574e-74	1.501e-32	2.64728e-32	5.12054e-44	3.97351e-43	4.79838e-38	8.12356e-38	1.16782e-21	5.67756e-21	1.96923e-27	5.39585e-27
C	27	P	4.29083e-105	1.98886e-104	8.85241e-69	9.68705e-68	1.92551e-53	3.02194e-52	3.81953e-33	5.49749e-33	4.60835e-19	1.70274e-18	6.47059e-27	1.63981e-26
C	27	Q	3.17429e-107	1.59226e-106	2.82141e-73	6.17486e-72	1.3429e-53	2.20676e-52	6.37053e-80	1.08267e-78	1.01745e-26	9.39845e-26	3.63577e-29	1.2744e-28
C	27	R	6.25103e-141	5.58287e-140	9.5596e-65	6.30521e-64	1.41161e-54	2.43423e-53	4.76493e-80	8.42188e-79	1.31617e-31	1.87043e-30	1.37219e-28	4.48909e-28
C	27	S	1.84492e-62	2.36212e-62	4.25791e-29	6.9732e-29	3.91092e-35	2.02323e-34	2.06842e-45	4.43674e-45	2.07065e-11	3.55302e-11	7.73594e-47	3.7962e-45
C	27	T	1.28398e-98	4.31341e-98	1.8822e-46	5.96217e-46	5.11727e-54	8.50923e-53	6.68855e-22	7.6765e-22	1.82429e-20	7.83784e-20	2.76812e-22	4.86716e-22
C	27	V	7.77989e-161	1.67577e-159	6.90922e-74	1.66334e-72	2.24822e-60	6.28057e-59	3.81257e-119	3.36931e-117	1.97019e-76	2.72986e-74	5.02931e-23	9.42638e-23
C	27	W	6.4197e-107	3.13432e-106	5.52182e-66	4.15417e-65	3.88682e-55	7.43551e-54	6.55052e-75	6.15843e-74	5.7614e-20	2.33077e-19	1.41605e-32	8.30843e-32
C	27	Y	2.85792e-104	1.23118e-103	1.95668e-68	2.00449e-67	7.62279e-49	8.25382e-48	6.32272e-79	9.97788e-78	3.90548e-24	2.48799e-23	1.82476e-30	7.87245e-30
K	28	A	0.212965	0.0883122	0.683868	0.218198	0.186645	0.427383	0.000318044	0.000271825	0.0211647	0.0243308	1.5074e-13	1.87486e-13
K	28	C	0.253121	0.0949661	0.717704	0.226302	0.230341	0.516434	0.00625981	0.00454936	0.172554	0.0921341	1.04158e-18	1.55315e-18
K	28	D	1.51599e-85	3.13627e-85	2.01456e-56	8.43459e-56	9.76363e-44	7.33212e-43	2.17583e-74	1.88515e-73	5.12918e-22	2.60804e-21	1.15543e-27	3.2484e-27
K	28	E	4.5352e-81	8.30341e-81	4.1694e-48	1.375e-47	1.09271e-34	5.57039e-34	2.0774e-74	1.83587e-73	2.93232e-24	1.88976e-23	1.17098e-28	3.85419e-28
K	28	F	1.8332e-09	1.46247e-09	6.38933e-05	6.89768e-05	9.79653e-06	2.92387e-05	1.00803e-19	1.09439e-19	0.000109707	0.000143404	1.385e-25	3.00247e-25
K	28	G	6.08331e-26	5.74115e-26	3.18254e-08	3.70132e-08	1.89186e-19	7.02802e-19	4.73076e-21	5.30552e-21	9.40108e-12	1.66466e-11	6.61075e-24	1.26991e-23
K	28	H	0.0527597	0.0334244	0.347014	0.14695	0.0761124	0.187501	0.00352415	0.00276101	0.129317	0.0796355	2.82247e-20	4.58903e-20
K	28	I	0.00194823	0.00140432	0.0890644	0.0816822	0.0121215	0.0333948	9.42093e-37	1.52484e-36	0.0202975	0.0234855	2.37817e-06	2.49752e-06
K	28	L	2.59911e-26	2.47203e-26	2.62328e-07	2.99306e-07	8.98408e-21	3.40078e-20	2.36809e-23	2.76091e-23	5.75649e-16	1.44364e-15	5.11114e-18	7.33769e-18
K	28	M	1.61936e-13	1.35382e-13	3.83441e-05	4.15813e-05	8.63949e-10	2.76145e-09	1.8746e-23	2.19134e-23	9.49197e-08	1.40287e-07	1.06641e-25	2.33054e-25
K	28	N	7.11454e-85	1.43932e-84	2.18213e-37	4.50928e-37	3.06193e-49	3.5346e-48	5.30019e-33	7.50636e-33	3.50306e-18	1.12879e-17	3.84536e-21	6.42634e-21
K	28	P	0.187541	0.0830386	0.603839	0.198864	0.192301	0.439614	0.00458177	0.00351482	0.0424382	0.0439639	0.0535915	0.0440311
K	28	Q	2.04943e-14	1.7493e-14	0.0336747	0.0341345	3.62698e-18	1.31588e-17	1.57703e-19	1.70376e-19	3.10503e-05	4.14677e-05	6.8003e-21	1.12947e-20
K	28	R	0.474724	0.12996	0.311227	0.141503	0.980971	0.838913	0.903178	0.246349	0.820437	0.287793	1	0.327347
K	28	S	0.0248207	0.0165551	0.186946	0.126777	0.0694231	0.172543	1.47541e-08	1.3754e-08	1.92469e-09	3.02189e-09	0.0469698	0.0398023
K	28	T	1.306e-06	1.01319e-06	0.000216785	0.000231439	0.00148789	0.00427628	1.17611e-74	1.06059e-73	7.73723e-07	1.10521e-06	3.36339e-40	8.64545e-39
K	28	V	0.775488	0.183322	0.959739	0.283323	0.758385	0.793209	0.361699	0.110833	0.577027	0.219648	0.453884	0.173026
K	28	W	0.00214396	0.00153935	0.0366086	0.0369528	0.0252653	0.0685249	5.70642e-51	1.39309e-50	3.02198e-05	4.0456e-05	2.65532e-08	2.8724e-08
K	28	Y	0.0348831	0.0228504	0.23332	0.132722	0.0730524	0.180281	8.28277e-07	7.51518e-07	0.0736749	0.0607635	1.71391e-05	1.76221e-05
K	29	A	0.252751	0.0949244	0.326443	0.143286	0.509076	0.768726	0.0060801	0.00445539	0.0294318	0.0325591	0.118033	0.0673506
K	29	C	0.328155	0.107192	0.399339	0.156449	0.55315	0.776038	0.0301924	0.0144384	0.0801642	0.0635617	0.214553	0.097734
K	29	D	0.034843	0.0228504	0.145421	0.112025	0.133624	0.316347	0.013983	0.00826015	0.103444	0.0720251	0.0795227	0.0544746
K	29	E	0.447139	0.125465	0.365574	0.150443	0.831764	0.803292	0.13405	0.0450778	0.204783	0.100365	0.445523	0.170079
K	29	F	0.234112	0.0917247	0.384829	0.154151	0.395258	0.731715	0.0125534	0.00755165	0.133151	0.0810525	0.0424484	0.0368383
K	29	G	0.141032	0.073215	0.241147	0.133116	0.349871	0.696143	0.033127	0.0153436	0.118781	0.0763715	0.149317	0.0772779
K	29	H	0.816215	0.190368	0.509016	0.178893	0.753058	0.793209	0.403312	0.12265	0.82831	0.290188	0.325202	0.132785
K	29	I	4.6137e-06	3.54922e-06	0.21999	0.131004	1.47095e-06	4.48605e-06	0.0411332	0.0177495	0.220986	0.104319	0.0949889	0.0601814
K	29	L	0.604085	0.152448	0.477854	0.172732	0.949881	0.833337	0.355608	0.109119	0.510215	0.198302	0.533567	0.196733
K	29	M	0.546644	0.142211	0.335874	0.144391	0.923677	0.826884	0.103706	0.0362951	0.248914	0.113638	0.254494	0.109927
K	29	N	0.673212	0.164452	0.515093	0.179925	1	0.838913	0.691953	0.195869	0.956789	0.325128	0.607131	0.220098
K	29	P	7.49614e-15	6.44344e-15	1.42204e-07	1.63411e-07	8.48525e-09	2.65742e-08	0.0144438	0.00845329	0.13743	0.0825115	0.000732505	0.000734949
K	29	Q	0.684922	0.166757	0.731328	0.229396	0.817726	0.802739	0.208216	0.0670094	0.32342	0.136937	0.46651	0.176819
K	29	R	0.289933	0.10121	0.525477	0.182546	0.397021	0.731715	0.0765465	0.0282568	0.17226	0.0920657	0.271059	0.114848
K	29	S	0.233027	0.0915546	0.179975	0.124866	0.698073	0.785994	0.0522935	0.0211989	0.17372	0.0926675	0.173103	0.084638
K	29	T	1	0.222329	0.943066	0.27933	0.945996	0.833337	0.83737	0.230966	1	0.333675	0.711461	0.250354
K	29	V	0.349845	0.110465	0.304433	0.141286	0.745444	0.793209	0.0135924	0.0080741	0.0733601	0.0605941	0.103253	0.0626666
K	29	W	0.343959	0.110072	0.22019	0.131004	0.945203	0.833337	0.277046	0.0870061	0.438767	0.175662	0.464936	0.176609
K	29	Y	0.258746	0.0959652	0.260753	0.134709	0.600199	0.778563	0.0698892	0.0261267	0.176672	0.0932546	0.226475	0.101536
C	30	A	1.92586e-93	5.30229e-93	4.78963e-56	1.95435e-55	3.50513e-39	2.10126e-38	7.39886e-62	2.49566e-61	2.03751e-18	6.84398e-18	5.38822e-22	9.41274e-22
C	30	D	2.01986e-66	2.73935e-66	2.02493e-33	3.63796e-33	8.9638e-35	4.58628e-34	1.13367e-103	8.34885e-102	1.10369e-14	2.44895e-14	7.985e-67	2.15513e-64
C	30	E	3.88091e-96	1.18425e-95	1.84548e-68	1.93167e-67	4.03214e-47	3.88417e-46	3.17243e-79	5.19183e-78	1.5713e-28	1.70758e-27	1.76417e-28	5.56896e-28
C	30	F	2.88192e-105	1.35294e-104	8.43504e-45	2.40316e-44	2.40021e-62	7.61951e-61	4.10972e-77	5.04431e-76	3.30333e-18	1.07786e-17	4.5014e-34	3.4363e-33
C	30	G	1.88605e-118	1.17055e-117	3.03227e-66	2.39343e-65	1.70513e-64	6.10694e-63	4.36999e-82	1.07275e-80	1.32184e-25	1.04658e-24	8.05091e-33	4.88297e-32
C	30	H	2.77018e-41	2.94876e-41	4.58081e-14	5.96105e-14	3.67147e-25	1.50389e-24	2.61056e-49	6.13575e-49	5.4492e-10	8.75399e-10	5.26174e-48	3.15585e-46
C	30	I	2.4084e-75	3.81774e-75	8.57681e-41	1.99498e-40	2.04882e-36	1.10068e-35	1.76184e-37	2.93774e-37	2.94673e-19	1.111e-18	2.10566e-28	6.5196e-28
C	30	K	4.93974e-80	8.69622e-80	1.06377e-42	2.75371e-42	3.8337e-39	2.28841e-38	3.36089e-34	4.96679e-34	5.56544e-17	1.60654e-16	1.07855e-28	3.57177e-28
C	30	L	1.61212e-87	3.4321e-87	2.68387e-41	6.52647e-41	4.80772e-48	4.93778e-47	1.54409e-29	2.03061e-29	5.91232e-15	1.36533e-14	3.1076e-24	6.09989e-24
C	30	M	1.12285e-90	2.75948e-90	6.33733e-45	1.82714e-44	1.45109e-47	1.46874e-46	1.42076e-39	2.54165e-39	5.74826e-15	1.333e-14	3.25932e-26	7.51866e-26
C	30	N	1.29323e-68	1.82134e-68	2.66152e-37	5.43001e-37	4.44888e-33	2.17278e-32	3.41459e-22	3.92916e-22	8.92991e-09	1.35596e-08	5.38754e-27	1.40491e-26
C	30	P	2.6109e-65	3.51489e-65	4.11573e-34	7.47796e-34	5.88471e-33	2.86401e-32	1.91786e-39	3.4171e-39	1.17222e-22	6.36946e-22	3.25345e-33	2.09071e-32
C	30	Q	2.5209e-64	3.32049e-64	6.49142e-36	1.24523e-35	3.75469e-30	1.69178e-29	8.87842e-32	1.22981e-31	2.00099e-13	4.01818e-13	1.09484e-33	7.57682e-33
C	30	R	1.06006e-87	2.28334e-87	2.79541e-61	1.40203e-60	7.29661e-43	4.996e-42	1.08049e-36	1.74246e-36	1.83712e-15	4.40776e-15	3.2277e-29	1.1576e-28
C	30	S	1.0493e-78	1.75446e-78	2.09251e-44	5.82376e-44	3.69595e-36	1.97041e-35	4.15122e-35	6.34702e-35	1.06142e-17	3.25014e-17	1.16783e-26	2.89168e-26
C	30	T	8.11074e-72	1.20241e-71	9.47764e-39	2.0372e-38	7.69822e-35	3.95323e-34	1.21786e-25	1.47434e-25	8.85933e-10	1.4029e-09	1.13935e-27	3.21997e-27
C	30	V	1.03677e-95	3.11182e-95	1.32165e-62	7.23132e-62	8.73041e-51	1.16138e-49	3.04074e-63	1.11042e-62	1.15892e-16	3.16409e-16	2.94366e-26	6.87868e-26
C	30	W	1.10241e-100	3.9192e-100	2.4242e-70	3.43298e-69	1.88397e-51	2.63151e-50	9.22254e-36	1.44509e-35	3.74414e-10	6.08079e-10	1.72265e-27	4.76862e-27
C	30	Y	5.65485e-104	2.3266e-103	1.58023e-63	9.27875e-63	7.50793e-57	1.58894e-55	4.07585e-71	2.77075e-70	3.49463e-18	1.12879e-17	7.89251e-31	3.70464e-30
C	31	A	0.614442	0.153698	0.362072	0.149365	0.842368	0.803696	0.0321563	0.0150629	0.137368	0.0825115	0.125005	0.069564
C	31	D	1.69053e-107	8.59764e-107	6.30731e-79	3.1502e-77	6.76847e-42	4.48063e-41	1.17213e-24	1.39603e-24	3.25568e-12	5.95513e-12	2.12018e-29	7.73286e-29
C	31	E	1.2292e-104	5.42296e-104	2.51501e-63	1.42463e-62	4.06819e-43	2.82707e-42	1.45504e-43	2.94925e-43	1.07656e-18	3.80043e-18	2.62811e-35	2.32564e-34
C	31	F	1.7218e-71	2.53206e-71	2.09379e-31	3.57493e-31	6.60005e-42	4.38995e-41	8.59795e-26	1.0466e-25	1.09859e-22	6.02847e-22	1.04251e-29	4.01957e-29
C	31	G	4.3895e-18	3.89184e-18	4.54792e-10	5.54368e-10	1.81397e-09	5.73244e-09	8.28354e-37	1.34567e-36	3.4935e-06	4.7926e-06	2.19306e-42	6.96354e-41
C	31	H	2.97208e-71	4.35322e-71	1.11666e-36	2.22172e-36	2.08254e-36	1.11451e-35	1.73097e-70	1.0623e-69	2.7927e-58	1.54781e-56	1.09108e-21	1.87567e-21
C	31	I	5.00999e-21	4.54094e-21	4.76153e-11	5.93939e-11	1.7838e-11	5.8488e-11	1.48267e-28	1.89897e-28	2.75744e-13	5.45809e-13	3.76138e-28	1.11559e-27
C	31	K	4.30002e-79	7.39233e-79	1.19298e-34	2.21777e-34	3.2138e-46	2.82327e-45	7.94452e-34	1.16239e-33	2.60504e-13	5.19352e-13	7.93764e-26	1.77054e-25
C	31	L	1.32047e-68	1.85258e-68	3.52409e-25	5.40381e-25	3.67728e-45	3.00374e-44	4.13288e-60	1.26819e-59	1.63408e-15	3.95486e-15	1.36799e-22	2.46146e-22
C	31	M	0.0010455	0.000768746	0.134347	0.10781	3.96867e-05	0.000117196	6.14335e-10	5.83774e-10	0.0183874	0.0214998	1.89237e-24	3.78331e-24
C	31	N	2.08246e-33	2.09491e-33	1.08194e-26	1.68588e-26	2.38806e-23	9.36973e-23	4.66201e-32	6.51896e-32	5.23543e-07	7.53676e-07	2.58628e-30	1.09926e-29
C	31	P	6.61329e-93	1.7938e-92	2.03903e-63	1.18285e-62	1.67385e-45	1.40001e-44	3.50728e-68	1.82324e-67	2.89856e-21	1.33873e-20	6.5044e-25	1.34009e-24
C	31	Q	8.7756e-58	1.07114e-57	4.33865e-32	7.54149e-32	2.1317e-27	9.02285e-27	3.51619e-41	6.69695e-41	1.85742e-16	4.91628e-16	8.30167e-37	9.95823e-36
C	31	R	2.14742e-90	5.17324e-90	4.11139e-60	1.94075e-59	6.04005e-47	5.70046e-46	7.5519e-71	4.83615e-70	3.0421e-26	2.63443e-25	2.50732e-26	5.93614e-26
C	31	S	0.721564	0.174287	0.728863	0.228922	0.83589	0.803292	0.147214	0.0489458	0.292029	0.126962	0.349911	0.140431
C	31	T	0.00259134	0.00185329	0.0559744	0.054407	0.0210678	0.0573631	3.72971e-05	3.26344e-05	0.0290798	0.032234	2.58995e-15	3.44346e-15
C	31	V	0.365737	0.112645	0.600194	0.198206	0.467018	0.765105	2.48342e-06	2.22134e-06	0.110706	0.0738354	0.000377785	0.000380459
C	31	W	6.69504e-73	1.02576e-72	5.48006e-46	1.69139e-45	1.28604e-28	5.59605e-28	5.73917e-35	8.71463e-35	2.69737e-14	5.74988e-14	1.60499e-28	5.09628e-28
C	31	Y	2.15143e-86	4.5276e-86	8.56602e-45	2.42612e-44	1.99286e-43	1.44228e-42	1.05214e-42	2.10365e-42	1.81141e-11	3.11784e-11	9.42104e-34	6.69136e-33
F	32	A	3.04128e-66	4.10938e-66	1.46236e-36	2.8739e-36	1.97712e-31	9.1748e-31	2.22751e-43	4.49436e-43	2.47929e-17	7.42759e-17	4.7367e-39	9.1316e-38
F	32	C	1.97793e-26	1.88612e-26	2.10715e-13	2.6983e-13	1.50189e-14	5.16707e-14	9.69069e-21	1.08131e-20	7.29636e-05	9.60542e-05	2.01809e-28	6.33347e-28
F	32	D	6.74135e-91	1.66792e-90	1.34583e-45	4.04997e-45	4.13683e-47	3.95772e-46	8.41428e-83	2.18706e-81	1.55681e-24	1.05224e-23	8.6385e-34	6.21736e-33
F	32	E	3.68754e-89	8.33513e-89	3.65785e-45	1.06739e-44	8.19156e-46	7.0629e-45	8.88166e-73	6.65173e-72	1.39256e-44	4.54002e-43	9.26961e-38	1.42963e-36
F	32	G	1.48919e-72	2.26267e-72	9.08519e-33	1.60823e-32	1.52067e-41	9.8336e-41	1.94812e-41	3.75901e-41	2.22796e-12	4.10236e-12	2.87768e-36	2.93087e-35
F	32	H	5.00444e-63	6.45249e-63	5.09424e-39	1.10486e-38	1.1478e-25	4.7433e-25	2.4659e-25	2.94487e-25	5.19662e-10	8.39691e-10	4.08412e-30	1.69584e-29
F	32	I	2.08315e-84	4.10107e-84	2.15459e-32	3.77237e-32	1.3811e-53	2.24315e-52	1.00094e-26	1.23543e-26	3.71365e-09	5.74924e-09	2.06005e-28	6.42778e-28
F	32	K	1.71865e-101	6.2933e-101	8.03876e-52	2.86707e-51	1.67831e-51	2.41675e-50	3.09202e-47	6.93536e-47	6.08246e-21	2.74073e-20	1.77203e-37	2.45265e-36
F	32	L	0.744676	0.17811	0.761392	0.236915	0.850156	0.806163	0.804319	0.223103	0.855715	0.298243	0.517154	0.191861
F	32	M	0.0316221	0.0207886	0.294142	0.139347	0.0475622	0.124877	0.0649612	0.0248307	0.514839	0.199959	8.34213e-07	8.82949e-07
F	32	N	6.20346e-80	1.08169e-79	1.1061e-40	2.54817e-40	5.11929e-41	3.28008e-40	9.63301e-36	1.50407e-35	1.1135e-14	2.45871e-14	6.527e-31	3.11792e-30
F	32	P	4.2966e-67	5.91471e-67	2.35499e-32	4.1083e-32	1.613e-36	8.69893e-36	1.84315e-24	2.18346e-24	0.0206177	0.0237568	3.23823e-29	1.1576e-28
F	32	Q	7.7244e-69	1.10488e-68	2.52769e-40	5.68713e-40	3.35142e-30	1.51496e-29	4.67033e-33	6.70022e-33	5.63657e-19	2.06886e-18	5.99401e-27	1.53343e-26
F	32	R	2.49418e-87	5.27925e-87	7.29053e-57	3.07919e-56	3.18932e-47	3.11525e-46	1.83208e-46	4.02755e-46	1.5754e-11	2.74572e-11	4.86179e-40	1.19289e-38
F	32	S	3.00875e-141	2.75433e-140	9.3142e-39	2.01105e-38	2.17478e-104	3.79714e-102	1.00226e-31	1.37965e-31	2.77819e-13	5.4796e-13	4.27512e-32	2.37906e-31
F	32	T	3.38184e-104	1.43994e-103	2.76956e-66	2.2225e-65	1.178e-39	7.24852e-39	1.01862e-38	1.77203e-38	1.79148e-18	6.09138e-18	8.67175e-32	4.68097e-31
F	32	V	7.58992e-25	7.10805e-25	1.56335e-13	2.00728e-13	7.29288e-13	2.43699e-12	6.79004e-26	8.31108e-26	1.22087e-10	2.03198e-10	3.96742e-29	1.36407e-28
F	32	W	0.486752	0.13154	0.459369	0.169273	0.773205	0.793209	0.117627	0.0402601	0.18563	0.0953224	0.4323	0.166325
F	32	Y	0.154528	0.0761569	0.126301	0.104848	0.604069	0.778563	0.0155516	0.00893051	0.171429	0.0918191	0.0396239	0.0351212
H	33	A	4.66304e-82	8.71171e-82	1.35864e-40	3.08569e-40	2.91838e-43	2.07978e-42	5.73218e-35	8.71463e-35	3.95751e-16	1.01546e-15	1.95485e-31	1.00497e-30
H	33	C	5.91023e-80	1.03549e-79	1.02865e-37	2.15338e-37	5.16227e-44	3.98376e-43	9.10315e-26	1.10505e-25	4.39498e-09	6.76624e-09	3.43748e-28	1.03085e-27
H	33	D	1.72612e-227	1.58016e-225	1.7656e-111	8.50109e-109	6.56423e-91	6.11256e-89	4.36318e-78	6.21919e-77	3.01601e-28	3.21456e-27	5.65223e-28	1.64035e-27
H	33	E	1.65714e-163	4.04538e-162	4.21614e-72	8.82612e-71	3.54003e-93	3.53192e-91	2.25348e-67	1.10638e-66	8.1536e-19	2.97302e-18	5.45775e-30	2.19856e-29
H	33	F	5.54473e-105	2.47604e-104	1.47174e-68	1.57472e-67	5.14181e-49	5.79196e-48	2.46175e-62	8.56509e-62	7.2491e-15	1.6466e-14	4.81977e-24	9.39239e-24
H	33	G	1.15478e-94	3.30353e-94	5.49745e-69	6.15567e-68	2.04028e-43	1.46899e-42	6.25453e-41	1.17603e-40	6.46544e-12	1.16343e-11	2.65036e-38	4.2078e-37
H	33	I	5.11209e-79	8.66632e-79	1.33226e-41	3.28409e-41	3.47234e-39	2.09057e-38	1.41079e-43	2.87272e-43	5.73145e-24	3.56917e-23	1.81989e-29	6.72853e-29
H	33	K	9.06092e-113	5.10445e-112	6.19374e-79	3.1502e-77	2.19029e-50	2.83275e-49	2.85099e-46	6.23645e-46	5.60046e-25	4.03112e-24	1.07992e-30	4.85778e-30
H	33	L	9.06938e-171	3.01908e-169	5.43107e-78	2.24125e-76	2.01379e-94	2.55713e-92	4.49845e-83	1.4198e-81	5.29143e-29	5.86537e-28	1.21339e-29	4.64528e-29
H	33	M	8.52417e-172	3.12135e-170	1.3878e-74	3.93062e-73	4.78624e-99	7.42818e-97	8.04734e-83	2.18706e-81	1.06352e-23	6.5493e-23	1.45826e-37	2.12746e-36
H	33	N	7.28584e-104	2.93176e-103	2.37434e-67	2.19848e-66	1.95596e-53	3.03562e-52	3.61416e-73	2.85175e-72	2.89496e-22	1.51366e-21	1.3324e-29	5.02952e-29
H	33	P	4.67563e-79	7.96327e-79	2.6159e-36	5.07869e-36	1.61693e-44	1.27599e-43	2.848e-30	3.79048e-30	1.37927e-14	2.99779e-14	1.46672e-28	4.76946e-28
H	33	Q	4.33295e-163	9.91639e-162	6.62968e-89	7.98022e-87	8.02028e-51	1.07718e-49	2.99018e-66	1.37632e-65	2.96066e-17	8.73267e-17	6.77602e-26	1.52403e-25
H	33	R	3.95396e-159	8.0436e-158	6.4075e-71	9.95199e-70	2.22473e-60	6.28057e-59	1.02801e-68	5.47282e-68	1.33162e-22	7.16532e-22	2.16041e-26	5.18301e-26
H	33	S	1.36273e-142	1.31316e-141	1.97205e-76	6.78224e-75	1.5717e-88	1.21963e-86	1.8727e-36	2.97657e-36	2.50484e-11	4.28478e-11	1.5944e-35	1.46032e-34
H	33	T	1.35714e-141	1.27423e-140	3.66994e-69	4.3098e-68	1.26365e-90	1.10316e-88	1.38722e-55	3.73761e-55	5.56889e-33	8.81847e-32	2.22604e-33	1.48346e-32
H	33	V	1.99282e-112	1.10564e-111	1.46542e-71	2.71377e-70	5.3513e-55	9.96618e-54	2.59517e-89	1.27414e-87	3.76312e-23	2.12821e-22	1.3131e-42	4.43004e-41
H	33	W	5.7846e-109	2.98335e-108	2.52135e-75	7.58745e-74	9.76859e-56	1.92178e-54	5.92445e-48	1.37059e-47	6.32905e-21	2.82885e-20	3.43691e-39	6.8712e-38
H	33	Y	1.82716e-94	5.18652e-94	3.60982e-46	1.12862e-45	4.31138e-50	5.32928e-49	5.94195e-83	1.75037e-81	6.16153e-15	1.41113e-14	2.38047e-81	1.28497e-78
C	34	A	4.66331e-79	7.96327e-79	4.62125e-40	1.02067e-39	8.49229e-41	5.34322e-40	3.27792e-27	4.08003e-27	1.9575e-12	3.64065e-12	6.7318e-28	1.93287e-27
C	34	D	3.51119e-83	6.69644e-83	1.33687e-41	3.28409e-41	2.09339e-43	1.4995e-42	4.45263e-65	1.8918e-64	5.30744e-13	1.02138e-12	1.70937e-27	4.75624e-27
C	34	E	9.37001e-81	1.69855e-80	6.42999e-37	1.28462e-36	1.22569e-45	1.03135e-44	3.91254e-29	5.06987e-29	2.85641e-11	4.85618e-11	6.67736e-31	3.16176e-30
C	34	F	4.01994e-94	1.13231e-93	2.70864e-41	6.5536e-41	1.25709e-54	2.19487e-53	6.07657e-37	9.9079e-37	2.55167e-20	1.05539e-19	2.20803e-25	4.711e-25
C	34	G	1.16841e-114	7.01386e-114	1.23046e-71	2.44659e-70	9.18525e-60	2.51566e-58	4.01889e-77	5.04431e-76	2.61858e-15	6.20215e-15	2.29552e-31	1.15805e-30
C	34	H	2.70567e-85	5.50418e-85	4.15187e-60	1.94084e-59	5.9501e-42	3.97658e-41	1.02675e-60	3.24062e-60	9.22672e-09	1.3972e-08	1.49371e-28	4.82812e-28
C	34	I	8.04188e-78	1.32646e-77	2.84316e-33	5.08899e-33	2.57126e-46	2.27311e-45	7.32181e-36	1.15134e-35	8.91711e-14	1.83043e-13	8.66466e-31	3.96368e-30
C	34	K	3.98769e-90	9.54377e-90	3.62194e-53	1.34147e-52	9.532e-39	5.57079e-38	7.25797e-38	1.2148e-37	4.03688e-12	7.35979e-12	1.35083e-36	1.4881e-35
C	34	L	1.03824e-85	2.16011e-85	3.27726e-62	1.73401e-61	9.88483e-42	6.48217e-41	1.56582e-38	2.70268e-38	1.30435e-18	4.51821e-18	6.71742e-28	1.93287e-27
C	34	M	2.74934e-92	7.14002e-92	4.89614e-58	2.14311e-57	5.7102e-47	5.42582e-46	5.01556e-71	3.3579e-70	1.86489e-26	1.6944e-25	2.37386e-26	5.64494e-26
C	34	N	1.073e-84	2.14704e-84	1.76998e-43	4.761e-43	4.82646e-43	3.3374e-42	6.32037e-41	1.18338e-40	2.09098e-20	8.84651e-20	4.86275e-30	1.9736e-29
C	34	P	2.84543e-123	1.89441e-122	1.61933e-80	1.11383e-78	2.81477e-57	6.14319e-56	1.5427e-66	7.17548e-66	1.73743e-18	5.94408e-18	3.19269e-31	1.5811e-30
C	34	Q	4.58061e-91	1.14884e-90	2.31926e-46	7.29861e-46	1.62869e-46	1.44901e-45	7.39252e-82	1.63326e-80	4.43953e-26	3.77909e-25	1.61361e-32	9.36581e-32
C	34	R	1.37512e-114	8.12156e-114	7.86914e-71	1.18402e-69	2.19993e-58	5.48722e-57	9.89974e-67	4.65359e-66	3.96784e-18	1.26386e-17	1.31059e-26	3.23036e-26
C	34	S	1.17074e-121	7.52101e-121	3.13556e-60	1.50973e-59	5.78369e-77	2.99207e-75	3.5195e-63	1.27472e-62	2.03979e-16	5.35792e-16	1.48167e-24	2.98432e-24
C	34	T	8.88867e-88	1.92593e-87	5.11345e-43	1.34538e-42	1.44616e-46	1.30322e-45	1.5114e-62	5.30031e-62	1.59365e-13	3.23535e-13	3.8688e-27	1.02875e-26
C	34	V	7.51277e-148	1.1004e-146	5.30048e-61	2.60419e-60	2.13211e-62	6.92582e-61	1.08228e-55	2.93389e-55	4.91137e-14	1.03108e-13	1.1355e-09	1.2743e-09
C	34	W	2.81378e-114	1.63546e-113	1.06352e-66	9.23369e-66	1.48832e-65	5.47073e-64	1.42059e-64	5.75886e-64	1.33467e-15	3.24437e-15	3.78238e-29	1.31723e-28
C	34	Y	3.06228e-97	9.75074e-97	1.70001e-64	1.07701e-63	2.44726e-50	3.10755e-49	2.48676e-74	2.11311e-73	9.24446e-26	7.53469e-25	1.63302e-26	3.9529e-26
Q	35	A	0.0267684	0.0178218	0.0584457	0.0557242	0.162773	0.3802	0.0314242	0.0148666	0.0860496	0.0668563	0.179873	0.0869325
Q	35	C	0.913746	0.207692	0.637553	0.206315	0.54079	0.771849	0.0388804	0.017083	0.0867318	0.0668563	0.230328	0.102582
Q	35	D	2.65895e-80	4.72643e-80	2.76443e-41	6.65515e-41	7.91145e-41	5.00028e-40	1.86973e-65	8.26174e-65	1.30973e-14	2.85786e-14	3.34845e-60	6.02492e-58
Q	35	E	0.270618	0.09821	0.761695	0.236915	0.219467	0.495232	0.0750484	0.0277502	0.277547	0.12257	0.156016	0.0793028
Q	35	F	0.00553905	0.00386337	0.0915484	0.0834733	8.64888e-09	2.70261e-08	1.35977e-25	1.64163e-25	7.96055e-09	1.21543e-08	2.48567e-29	9.00505e-29
Q	35	G	6.75342e-38	6.92701e-38	4.20041e-17	5.68099e-17	2.06627e-22	7.97277e-22	4.67522e-17	4.88376e-17	6.6153e-09	1.01563e-08	1.17126e-09	1.30898e-09
Q	35	H	0.133978	0.0709981	0.165765	0.120382	0.429129	0.752633	0.105251	0.0367354	0.285751	0.125097	0.221102	0.0997076
Q	35	I	0.916041	0.208085	0.843591	0.256749	0.989183	0.838913	0.507442	0.150586	0.729099	0.261717	0.526507	0.194395
Q	35	K	5.87849e-78	9.74011e-78	1.43651e-36	2.83466e-36	3.09359e-43	2.19345e-42	1.27057e-26	1.56386e-26	5.66873e-10	9.08035e-10	1.58366e-28	5.08839e-28
Q	35	L	0.0189773	0.0127975	0.124418	0.103642	0.599929	0.778563	9.03964e-10	8.55316e-10	0.0634846	0.055585	1.09524e-21	1.87684e-21
Q	35	M	0.421476	0.120936	0.265343	0.134884	0.969417	0.838913	0.325947	0.100788	0.43236	0.173633	0.555648	0.204316
Q	35	N	0.0308251	0.0203377	0.12858	0.105648	0.132237	0.313594	0.197176	0.0637349	0.318787	0.135389	0.397996	0.154893
Q	35	P	1.92185e-06	1.48467e-06	5.64162e-09	6.72365e-09	0.766778	0.793209	0.705391	0.19929	1	0.333675	0.503499	0.188087
Q	35	R	1.15563e-88	2.54918e-88	3.91464e-60	1.86618e-59	1.22125e-45	1.03135e-44	1.813e-80	3.33795e-79	3.82327e-19	1.42213e-18	1.544e-39	3.47268e-38
Q	35	S	0.0862143	0.0519237	0.223619	0.131144	0.242719	0.539841	0.0450872	0.0190465	0.227122	0.106586	0.00165402	0.00164123
Q	35	T	0.748694	0.178718	1	0.290401	0.701643	0.785994	0.741405	0.208267	0.761688	0.270958	0.913547	0.307821
Q	35	V	0.783882	0.184829	1	0.290401	0.744955	0.793209	0.320218	0.099294	0.534412	0.206547	0.417438	0.16176
Q	35	W	1.40104e-89	3.28863e-89	3.73634e-57	1.60624e-56	1.07268e-46	9.79284e-46	4.09156e-64	1.62876e-63	1.80756e-15	4.35568e-15	2.78379e-25	5.82433e-25
Q	35	Y	0.604994	0.152557	0.641643	0.207065	0.760735	0.793209	0.44423	0.133531	0.453	0.180365	0.799994	0.275228
V	36	A	0.892628	0.203777	0.892364	0.268202	0.948133	0.833337	0.916168	0.248359	1	0.333675	0.877362	0.297485
V	36	C	0.84842	0.195637	0.757996	0.236069	1	0.838913	0.80059	0.222627	0.72783	0.261536	1	0.327347
V	36	D	6.56492e-53	7.63148e-53	7.21682e-27	1.13185e-26	9.23498e-28	3.93272e-27	9.28061e-32	1.2815e-31	8.53777e-14	1.76564e-13	8.30292e-31	3.83066e-30
V	36	E	1.14058e-71	1.68408e-71	1.65673e-45	4.89382e-45	1.49448e-39	9.11559e-39	2.1082e-68	1.10898e-67	4.93864e-18	1.5552e-17	2.08906e-34	1.65833e-33
V	36	F	0.811803	0.189646	0.862531	0.261851	0.642022	0.784206	0.531421	0.15666	0.831916	0.2909	0.442237	0.169303
V	36	G	0.0449536	0.0287779	0.0850774	0.0786247	0.235154	0.524698	0.00900713	0.00594912	0.10239	0.0719241	2.83189e-05	2.90065e-05
V	36	H	0.43022	0.122318	0.474323	0.171843	0.662725	0.785994	0.279907	0.0878422	0.575436	0.219362	0.332111	0.134696
V	36	I	0.397222	0.117018	0.811024	0.249041	0.141348	0.332939	0.299358	0.0934157	0.305813	0.131287	0.682455	0.241723
V	36	K	1	0.222329	0.766878	0.238373	0.761583	0.793209	0.326473	0.10088	0.552133	0.212655	0.428739	0.165072
V	36	L	0.244264	0.0936584	0.238397	0.132932	0.595124	0.778563	0.170029	0.0556111	0.450063	0.179332	0.23174	0.10311
V	36	M	0.90428	0.205858	0.784981	0.242125	0.691638	0.785994	0.933024	0.25246	0.783445	0.277984	0.522424	0.193284
V	36	N	0.0653542	0.0405613	0.390773	0.155003	0.0833448	0.203523	0.100167	0.0352954	0.201605	0.0999648	0.305131	0.125828
V	36	P	2.94861e-63	3.81524e-63	1.96368e-36	3.84342e-36	1.61782e-28	6.99616e-28	1.15139e-39	2.06813e-39	2.31472e-19	8.90898e-19	3.67315e-31	1.8025e-30
V	36	Q	0.386658	0.11533	0.585195	0.195532	0.532542	0.77067	0.323011	0.10002	0.602417	0.22806	0.361901	0.143853
V	36	R	0.615536	0.153743	0.773285	0.239746	0.692811	0.785994	0.605161	0.175001	0.781	0.277294	0.637147	0.22913
V	36	S	0.5867	0.148984	0.878794	0.265117	0.349608	0.696143	0.615739	0.177595	0.631982	0.236506	0.825851	0.282324
V	36	T	0.474871	0.12996	1	0.290401	0.320311	0.667772	0.324647	0.100456	0.616679	0.232348	0.353815	0.141787
V	36	W	0.838386	0.194032	0.641543	0.207065	0.905704	0.825992	0.551872	0.161707	0.67119	0.247968	0.68698	0.243007
V	36	Y	0.14516	0.0742375	0.372233	0.151374	0.26529	0.580806	0.525356	0.15538	0.640876	0.239189	0.651747	0.232904
C	37	A	1.47257e-63	1.91893e-63	2.98409e-33	5.32146e-33	4.65881e-32	2.20589e-31	9.87983e-29	1.26906e-28	4.69039e-16	1.18702e-15	7.14389e-30	2.81477e-29
C	37	D	6.91986e-93	1.86315e-92	7.16732e-51	2.50069e-50	7.3073e-44	5.54715e-43	9.11636e-56	2.48656e-55	1.15339e-33	1.88014e-32	4.6346e-36	4.54861e-35
C	37	E	1.45737e-97	4.68119e-97	5.38601e-48	1.76414e-47	2.23644e-51	3.09291e-50	4.47025e-44	9.27351e-44	1.14602e-20	5.04099e-20	8.32908e-34	6.07567e-33
C	37	F	1.54708e-89	3.58547e-89	1.94561e-44	5.44642e-44	6.55718e-47	6.14698e-46	4.18934e-39	7.40454e-39	2.19774e-14	4.70293e-14	2.89047e-32	1.62527e-31
C	37	G	1.23106e-68	1.74049e-68	4.19122e-37	8.47903e-37	2.6355e-33	1.30079e-32	5.13834e-20	5.61997e-20	2.86286e-13	5.62657e-13	2.61772e-08	2.83742e-08
C	37	H	6.36277e-73	9.78948e-73	1.41829e-37	2.94347e-37	4.05958e-37	2.26815e-36	3.73842e-31	5.06715e-31	1.76313e-14	3.80229e-14	3.26449e-27	8.76695e-27
C	37	I	9.25644e-89	2.05423e-88	5.76098e-46	1.76677e-45	1.31361e-44	1.04252e-43	2.2715e-34	3.39089e-34	1.93536e-17	5.82957e-17	4.90898e-31	2.36593e-30
C	37	K	5.33252e-59	6.64164e-59	2.09638e-30	3.51698e-30	2.5123e-30	1.14305e-29	4.03302e-30	5.31958e-30	4.21339e-13	8.16504e-13	1.35328e-18	2.00684e-18
C	37	L	3.81011e-95	1.12514e-94	2.59976e-44	7.19394e-44	1.17618e-52	1.78573e-51	1.15723e-74	1.06059e-73	1.67614e-14	3.6288e-14	8.98756e-37	1.05466e-35
C	37	M	2.53152e-77	4.11993e-77	4.20329e-42	1.07081e-41	5.33995e-37	2.95984e-36	8.52415e-43	1.71207e-42	1.49994e-19	5.81342e-19	2.03288e-35	1.8289e-34
C	37	N	1.09263e-81	2.01053e-81	2.69489e-40	6.03512e-40	3.19906e-43	2.25677e-42	1.49067e-35	2.31116e-35	1.90447e-18	6.43612e-18	3.57737e-29	1.26212e-28
C	37	P	5.58406e-82	1.03794e-81	6.10616e-31	1.03159e-30	7.2703e-53	1.11594e-51	2.19115e-20	2.40845e-20	1.35299e-11	2.36552e-11	1.09799e-22	2.00233e-22
C	37	Q	1.5596e-80	2.81325e-80	4.88729e-40	1.0745e-39	2.85707e-42	1.91862e-41	6.65995e-31	8.94474e-31	6.36748e-10	1.01702e-09	1.32629e-29	5.02952e-29
C	37	R	6.1018e-98	2.01291e-97	4.46091e-42	1.13045e-41	1.25026e-57	2.86286e-56	6.11051e-82	1.42107e-80	4.85271e-30	6.11258e-29	3.36234e-28	1.01395e-27
C	37	S	1.13137e-73	1.7629e-73	3.37284e-35	6.41885e-35	3.0504e-40	1.8853e-39	5.60994e-31	7.55748e-31	1.68399e-13	3.40629e-13	4.89344e-33	3.07146e-32
C	37	T	1.54872e-50	1.75574e-50	4.07293e-28	6.62518e-28	3.98787e-24	1.58696e-23	1.30633e-27	1.63985e-27	2.04487e-15	4.88506e-15	7.92093e-14	9.94344e-14
C	37	V	6.63405e-128	4.85846e-127	1.27034e-71	2.44659e-70	1.6301e-73	7.58968e-72	4.72246e-33	6.75308e-33	2.42983e-20	1.01255e-19	2.55688e-24	5.05565e-24
C	37	W	1.78331e-84	3.54893e-84	3.17195e-40	7.07057e-40	4.97197e-46	4.31354e-45	3.28194e-34	4.86639e-34	3.11929e-13	6.10888e-13	2.64998e-39	5.50172e-38
C	37	Y	4.76392e-78	7.92925e-78	1.75927e-49	5.9235e-49	2.4901e-30	1.13665e-29	6.51894e-38	1.09525e-37	1.24198e-19	4.8475e-19	3.23801e-40	8.64545e-39
F	38	A	2.00803e-66	2.73342e-66	1.81875e-34	3.36808e-34	1.05767e-33	5.29513e-33	1.30023e-34	1.96757e-34	4.11182e-12	7.47183e-12	6.41599e-40	1.50579e-38
F	38	C	7.11514e-75	1.12302e-74	5.81777e-35	1.09421e-34	1.22313e-41	7.94631e-41	1.45101e-36	2.32303e-36	1.00628e-16	2.76095e-16	4.51981e-34	3.4363e-33
F	38	D	6.50013e-91	1.61918e-90	1.0734e-47	3.49208e-47	4.66292e-45	3.76481e-44	4.16087e-40	7.62885e-40	4.46639e-16	1.13551e-15	2.34717e-36	2.43652e-35
F	38	E	8.16125e-81	1.48679e-80	1.20322e-37	2.50794e-37	5.99939e-45	4.81603e-44	1.41453e-38	2.45111e-38	5.50602e-22	2.7742e-21	2.65934e-34	2.08043e-33
F	38	G	1.96765e-56	2.3546e-56	2.04879e-27	3.26642e-27	1.03093e-30	4.75244e-30	7.86293e-22	8.97772e-22	6.57092e-12	1.17858e-11	1.83002e-11	2.11982e-11
F	38	H	1.15471e-62	1.48361e-62	3.99972e-27	6.31412e-27	2.92982e-37	1.64351e-36	2.45284e-35	3.77642e-35	4.23959e-13	8.18718e-13	7.15711e-37	8.98459e-36
F	38	I	3.31796e-89	7.54632e-89	1.06078e-39	2.31109e-39	2.88038e-51	3.9444e-50	2.69113e-42	5.35642e-42	3.03205e-23	1.75048e-22	4.84128e-34	3.62958e-33
F	38	K	9.0564e-69	1.29036e-68	3.34641e-31	5.69345e-31	2.82511e-39	1.70826e-38	4.36208e-34	6.40354e-34	7.37566e-17	2.07388e-16	5.45164e-34	4.03119e-33
F	38	L	7.21386e-73	1.10064e-72	7.33408e-26	1.13911e-25	7.57203e-49	8.25382e-48	1.44752e-20	1.59903e-20	2.82042e-11	4.80976e-11	8.47832e-25	1.73354e-24
F	38	M	2.3847e-70	3.45146e-70	2.03542e-34	3.75489e-34	1.11395e-37	6.32501e-37	6.38162e-29	8.22109e-29	8.80615e-09	1.34084e-08	9.17694e-32	4.90462e-31
F	38	N	9.55846e-100	3.33341e-99	1.31079e-51	4.64063e-51	5.85567e-50	7.11229e-49	2.19586e-47	4.97579e-47	1.60119e-24	1.0692e-23	6.68639e-32	3.64574e-31
F	38	P	1.64957e-89	3.79895e-89	1.27927e-41	3.175e-41	1.09862e-49	1.30046e-48	1.63534e-31	2.2234e-31	8.58213e-14	1.76822e-13	2.15311e-32	1.23642e-31
F	38	Q	1.74739e-95	5.20204e-95	2.88562e-43	7.67615e-43	5.04824e-54	8.49557e-53	3.72768e-41	7.06929e-41	2.67134e-19	1.01407e-18	7.47109e-41	2.24048e-39
F	38	R	3.85397e-72	5.76013e-72	1.75907e-31	3.02488e-31	2.35564e-42	1.59725e-41	1.97879e-20	2.18046e-20	9.05823e-11	1.51673e-10	9.19214e-19	1.37448e-18
F	38	S	2.06435e-92	5.43823e-92	9.77531e-50	3.33806e-49	1.81329e-44	1.42292e-43	1.97305e-15	2.0228e-15	2.43811e-21	1.13553e-20	3.70898e-26	8.51953e-26
F	38	T	2.79003e-76	4.48089e-76	6.74444e-43	1.76486e-42	3.50944e-35	1.82229e-34	1.56785e-34	2.34841e-34	3.17286e-13	6.19192e-13	8.26969e-37	9.95823e-36
F	38	V	9.68339e-44	1.04906e-43	2.02612e-23	3.00168e-23	5.5424e-22	2.12098e-21	2.76489e-13	2.79568e-13	0.0224784	0.0256343	2.57094e-10	2.91551e-10
F	38	W	0.405836	0.118036	0.697237	0.221141	0.46209	0.765105	0.285437	0.0894507	0.614911	0.231839	0.258993	0.111131
F	38	Y	0.102853	0.0594042	0.117409	0.100054	0.381725	0.725428	0.00761428	0.00523251	0.0502702	0.0493997	0.0707141	0.0513053
M	39	A	0.586499	0.148984	0.537027	0.184958	0.839649	0.803292	0.740519	0.208267	0.617381	0.232455	0.9824	0.327347
M	39	C	0.391755	0.11578	0.360156	0.149106	0.724408	0.786842	0.230878	0.0737655	0.322855	0.136802	0.472242	0.178386
M	39	D	9.62391e-06	7.38794e-06	0.0221854	0.022776	6.17147e-06	1.85781e-05	0.0552914	0.02209	0.41898	0.169005	6.15824e-05	6.26024e-05
M	39	E	0.187792	0.0830495	0.274988	0.137168	0.417361	0.746389	2.2123e-41	4.2502e-41	5.06506e-41	1.22053e-39	0.030497	0.028237
M	39	F	0.00166065	0.00120176	0.00755244	0.00785397	0.0777872	0.190953	4.34904e-11	4.26098e-11	0.000490765	0.000628171	0.000849013	0.000850265
M	39	G	0.183146	0.0823878	0.455184	0.168252	0.275608	0.595923	0.154212	0.0509279	0.173901	0.0926748	0.500222	0.187512
M	39	H	9.76747e-47	1.08382e-46	2.09221e-21	2.99812e-21	4.86082e-27	2.04504e-26	1.52718e-21	1.73028e-21	6.58761e-08	9.79504e-08	1.00618e-21	1.7464e-21
M	39	I	0.231498	0.091346	0.223164	0.131037	0.611805	0.778563	0.0731476	0.027161	0.242561	0.111252	0.172084	0.0842921
M	39	K	2.17139e-85	4.46691e-85	5.34677e-44	1.46272e-43	3.43365e-43	2.39804e-42	3.91603e-44	8.1621e-44	2.23531e-22	1.19123e-21	6.84058e-33	4.21016e-32
M	39	L	0.179254	0.0816401	0.192403	0.12735	0.518515	0.77067	0.0113236	0.00704722	0.0778855	0.0625605	0.0747254	0.0527567
M	39	N	0.350976	0.110465	0.826653	0.252551	0.3023	0.639772	0.608591	0.175749	0.715179	0.258464	0.720121	0.252811
M	39	P	2.80735e-99	9.60733e-99	6.59182e-56	2.62303e-55	3.3112e-59	8.56491e-58	6.6227e-55	1.75231e-54	2.83957e-17	8.46122e-17	2.67258e-21	4.5224e-21
M	39	Q	2.30369e-08	1.81021e-08	0.00268549	0.00283558	1.38821e-06	4.24297e-06	1.7131e-14	1.74416e-14	0.00320046	0.00398608	2.75642e-17	3.86468e-17
M	39	R	7.79194e-145	8.91632e-144	3.54783e-61	1.76106e-60	8.29517e-58	1.9311e-56	2.17234e-61	7.11028e-61	1.86279e-16	4.91628e-16	1.70668e-22	3.05052e-22
M	39	S	0.490531	0.132321	0.284988	0.138333	0.935902	0.831061	0.165195	0.0541905	0.18404	0.0952841	0.657861	0.234396
M	39	T	0.153378	0.0757963	0.296209	0.139588	0.313824	0.658178	0.0388929	0.017083	0.150727	0.0856802	0.136766	0.0733094
M	39	V	0.401276	0.11755	0.318236	0.141961	0.787322	0.793451	0.0929939	0.0331647	0.254054	0.114756	0.223457	0.100511
M	39	W	4.96024e-109	2.59474e-108	5.13201e-45	1.48854e-44	7.15835e-66	2.70235e-64	1.33058e-65	5.93878e-65	8.40774e-38	1.66423e-36	1.5426e-37	2.19128e-36
M	39	Y	5.00322e-40	5.26453e-40	7.29167e-28	1.17813e-27	1.1185e-13	3.80126e-13	9.63524e-67	4.57796e-66	1.22117e-18	4.2567e-18	5.99088e-27	1.53343e-26
T	40	A	0.251455	0.0948267	0.161031	0.118735	0.781953	0.793451	0.428513	0.1296	0.624324	0.233956	0.519001	0.192281
T	40	C	1	0.222329	1	0.290401	1	0.838913	0.586771	0.170546	0.557668	0.214191	0.921501	0.310113
T	40	D	0.437942	0.123529	0.921696	0.274958	0.340971	0.687251	0.0697672	0.0261032	0.205812	0.10048	0.182845	0.0876472
T	40	E	0.765022	0.181668	0.751139	0.234541	0.485823	0.765105	0.844892	0.23246	0.935618	0.320093	0.92454	0.310942
T	40	F	0.124374	0.0677718	0.349805	0.147613	0.232623	0.520713	0.112536	0.0387274	0.302944	0.130257	0.200395	0.0931716
T	40	G	0.822757	0.191285	0.732478	0.229608	0.542641	0.771849	0.571652	0.166949	0.646998	0.24018	0.738341	0.258297
T	40	H	0.891145	0.203693	0.985529	0.28987	0.865942	0.810132	0.219065	0.0702962	0.27545	0.121838	0.581375	0.211858
T	40	I	0.880549	0.201523	0.841895	0.256395	1	0.838913	0.832148	0.229813	0.817862	0.287072	1	0.327347
T	40	K	0.126562	0.068455	0.318431	0.141961	0.266185	0.581853	0.00376554	0.00293452	0.0544313	0.0518008	0.0299213	0.0277993
T	40	L	0.781943	0.18449	0.503718	0.177428	0.816611	0.802739	1	0.265705	0.856683	0.298243	0.521872	0.193213
T	40	M	0.608645	0.152861	0.574871	0.193561	0.834766	0.803292	0.32011	0.099294	0.562854	0.215586	0.409082	0.158864
T	40	N	0.523342	0.13849	0.72427	0.227776	0.598643	0.778563	0.1276	0.0432381	0.372733	0.152886	0.205333	0.0946521
T	40	P	1.30012e-64	1.71868e-64	8.88914e-30	1.46575e-29	1.41505e-36	7.72082e-36	6.14929e-33	8.65342e-33	5.9594e-15	1.3705e-14	3.54759e-30	1.49607e-29
T	40	Q	0.136473	0.0715946	0.12937	0.10609	0.524015	0.77067	0.012299	0.00746501	0.0961281	0.0708476	0.0601989	0.0472794
T	40	R	0.159276	0.0768786	0.206145	0.129576	0.435613	0.75718	0.00386116	0.0029932	0.0288179	0.0320411	0.0690976	0.0504989
T	40	S	0.30422	0.103338	0.317365	0.141961	0.623312	0.780024	0.0636481	0.0244804	0.178465	0.0936913	0.22212	0.100083
T	40	V	0.73271	0.176166	0.654679	0.210286	0.949981	0.833337	0.147945	0.0491152	0.330093	0.139259	0.27856	0.117107
T	40	W	0.495428	0.132904	0.518506	0.180777	0.718587	0.785994	0.965464	0.260285	0.480099	0.188447	0.601319	0.218285
T	40	Y	0.313047	0.105359	0.656729	0.210804	0.350865	0.696143	0.287708	0.0900984	0.536388	0.207167	0.35728	0.142541
K	41	A	4.60019e-144	4.95436e-143	3.13186e-62	1.67549e-61	5.51302e-83	3.34806e-81	1.49835e-78	2.28301e-77	1.19913e-45	4.15373e-44	9.21247e-33	5.52539e-32
K	41	C	2.50487e-85	5.12415e-85	8.83562e-55	3.37636e-54	2.93008e-45	2.40747e-44	7.06863e-66	3.18715e-65	1.77473e-23	1.06915e-22	2.78401e-21	4.69623e-21
K	41	D	5.70747e-143	5.64848e-142	8.13133e-68	8.15648e-67	1.84052e-51	2.59679e-50	6.24301e-54	1.61321e-53	2.43074e-09	3.80564e-09	6.21762e-10	7.00676e-10
K	41	E	8.70004e-176	3.53972e-174	5.80303e-51	2.03947e-50	1.12464e-126	3.92723e-124	8.76504e-45	1.86202e-44	3.05094e-27	3.07442e-26	5.54576e-11	6.35578e-11
K	41	F	2.74726e-111	1.50146e-110	9.66993e-70	1.25836e-68	9.22185e-55	1.65141e-53	4.58531e-65	1.92962e-64	1.44344e-23	8.79122e-23	5.59695e-24	1.08287e-23
K	41	G	1.18042e-101	4.36608e-101	2.65668e-66	2.16805e-65	1.76932e-48	1.90105e-47	6.61271e-39	1.16412e-38	0.000872774	0.00110691	1.25406e-43	4.83527e-42
K	41	H	4.22634e-129	3.15833e-128	2.80105e-60	1.36228e-59	1.69079e-47	1.67495e-46	9.43009e-74	7.7164e-73	4.36301e-24	2.74787e-23	5.43571e-28	1.59466e-27
K	41	I	8.29009e-106	3.94238e-105	2.91906e-62	1.5792e-61	1.60846e-56	3.30394e-55	8.87996e-73	6.65173e-72	1.49726e-21	7.15371e-21	8.80515e-29	2.97061e-28
K	41	L	8.50423e-144	8.89727e-143	4.63595e-66	3.54308e-65	5.97797e-55	1.09868e-53	2.45194e-67	1.19059e-66	3.56115e-25	2.74126e-24	2.25842e-11	2.61046e-11
K	41	M	2.69907e-92	7.05954e-92	1.0618e-59	4.91579e-59	1.20109e-46	1.0894e-45	1.03941e-62	3.70389e-62	3.27825e-18	1.07786e-17	1.30812e-24	2.65457e-24
K	41	N	1.82462e-101	6.61515e-101	3.21392e-67	2.91972e-66	1.84005e-50	2.40202e-49	2.84048e-195	1.25512e-192	1.12785e-146	6.25093e-144	7.93166e-29	2.69275e-28
K	41	P	2.73496e-250	5.00739e-248	9.38786e-74	2.15244e-72	4.12263e-158	2.87922e-155	1.0518e-67	5.28132e-67	2.68639e-22	1.41799e-21	1.05808e-26	2.63202e-26
K	41	Q	4.72419e-143	4.80524e-142	1.86793e-67	1.76349e-66	2.34333e-50	3.00287e-49	2.94019e-65	1.2737e-64	1.95049e-21	9.23953e-21	2.73097e-27	7.37082e-27
K	41	R	8.72981e-83	1.64776e-82	4.26745e-69	4.89217e-68	5.71482e-25	2.32723e-24	6.74353e-18	7.14569e-18	1.6474e-09	2.60127e-09	0.000143326	0.000145153
K	41	S	3.10945e-97	9.81556e-97	1.25477e-64	8.07169e-64	2.5636e-45	2.11882e-44	1.74944e-64	7.02746e-64	9.6443e-19	3.46414e-18	6.13033e-27	1.56091e-26
K	41	T	2.92117e-148	4.45692e-147	6.34705e-56	2.54667e-55	5.56414e-94	6.47661e-92	1.75695e-63	6.46951e-63	1.11283e-21	5.45813e-21	2.62561e-12	3.12178e-12
K	41	V	2.75383e-135	2.29179e-134	1.16165e-65	8.47451e-65	4.59977e-49	5.22629e-48	0.0316239	0.0148972	6.19754e-06	8.41883e-06	3.26378e-11	3.76447e-11
K	41	W	7.84999e-148	1.10557e-146	4.97554e-65	3.37415e-64	4.98973e-84	3.168e-82	4.22124e-56	1.1731e-55	2.43284e-42	6.74181e-41	9.84265e-31	4.46472e-30
K	41	Y	4.95036e-146	6.25071e-145	4.90505e-65	3.37387e-64	1.59171e-60	4.63184e-59	1.24806e-62	4.41181e-62	1.93126e-20	8.23361e-20	4.13385e-26	9.45522e-26
A	42	C	2.66097e-13	2.21451e-13	6.38626e-09	7.59231e-09	8.95365e-06	2.67802e-05	8.63601e-11	8.42379e-11	0.000296039	0.000381569	7.35854e-20	1.17518e-19
A	42	D	8.26483e-106	3.94238e-105	1.44945e-45	4.30794e-45	5.12706e-62	1.53227e-60	3.44598e-84	1.26889e-82	9.68801e-19	3.46414e-18	1.76071e-38	2.97007e-37
A	42	E	4.40342e-62	5.57934e-62	4.14729e-31	7.03118e-31	9.75494e-33	4.73111e-32	7.51899e-64	2.86414e-63	1.01178e-19	3.97705e-19	1.03736e-21	1.79475e-21
A	42	F	5.79764e-40	6.06559e-40	8.50565e-23	1.23354e-22	7.66132e-19	2.79406e-18	1.03823e-19	1.12441e-19	1.17871e-06	1.66652e-06	9.37473e-23	1.7154e-22
A	42	G	0.194738	0.0844354	0.188591	0.126998	0.572483	0.778563	0.00515394	0.00387966	0.0769329	0.0620652	0.027967	0.0262649
A	42	H	5.77124e-57	6.97455e-57	1.34504e-30	2.26439e-30	4.14283e-28	1.77505e-27	2.41023e-22	2.78068e-22	0.0791786	0.0632326	9.47079e-37	1.08772e-35
A	42	I	3.23133e-69	4.64014e-69	5.61892e-34	1.01708e-33	5.17654e-37	2.88069e-36	7.35815e-39	1.28511e-38	9.9053e-16	2.43993e-15	5.80953e-36	5.50168e-35
A	42	K	6.13349e-64	8.04995e-64	2.55713e-25	3.9336e-25	2.66734e-40	1.65587e-39	5.66045e-42	1.11163e-41	9.5004e-20	3.76103e-19	2.02527e-36	2.18647e-35
A	42	L	1.84455e-28	1.79159e-28	4.21502e-09	5.06101e-09	1.36387e-16	4.8107e-16	4.60548e-28	5.84774e-28	3.26631e-09	5.08511e-09	5.44917e-35	4.52529e-34
A	42	M	3.17423e-36	3.21974e-36	1.81382e-18	2.49521e-18	2.1492e-19	7.96282e-19	5.41141e-33	7.63938e-33	3.21601e-18	1.06732e-17	3.37759e-33	2.14495e-32
A	42	N	1.08828e-54	1.28549e-54	3.87597e-30	6.47994e-30	2.86411e-26	1.1942e-25	1.12776e-39	2.03397e-39	2.46701e-23	1.45457e-22	4.76586e-18	6.87858e-18
A	42	P	1.43208e-89	3.34008e-89	2.04051e-41	4.98718e-41	5.54709e-50	6.79659e-49	3.51708e-38	5.97724e-38	6.56189e-23	3.63682e-22	7.26837e-26	1.62798e-25
A	42	Q	2.94861e-47	3.2918e-47	1.0572e-24	1.5957e-24	3.00907e-24	1.20777e-23	1.07548e-31	1.47583e-31	6.86472e-13	1.31195e-12	2.62195e-37	3.45198e-36
A	42	R	9.93302e-94	2.75548e-93	2.2097e-63	1.26659e-62	1.63327e-47	1.62952e-46	1.38312e-59	4.15752e-59	9.73756e-33	1.45862e-31	5.89283e-27	1.52197e-26
A	42	S	2.82322e-33	2.83232e-33	9.31024e-17	1.25216e-16	3.68508e-18	1.33349e-17	1.92039e-14	1.95071e-14	3.71105e-09	5.74924e-09	3.12988e-21	5.24688e-21
A	42	T	6.45451e-55	7.64882e-55	9.13155e-27	1.4275e-26	7.50695e-30	3.37158e-29	2.92385e-30	3.87975e-30	2.20157e-16	5.75558e-16	1.67046e-15	2.24305e-15
A	42	V	2.28241e-41	2.43663e-41	8.17622e-20	1.14773e-19	7.64595e-23	2.96661e-22	3.70872e-68	1.90554e-67	1.12786e-15	2.75372e-15	4.57758e-27	1.20534e-26
A	42	W	3.71523e-58	4.58057e-58	2.07892e-27	3.30352e-27	1.75466e-32	8.45135e-32	9.80898e-55	2.57993e-54	7.00583e-33	1.07857e-31	2.50233e-22	4.4142e-22
A	42	Y	2.41746e-29	2.36689e-29	1.95398e-17	2.66519e-17	1.68747e-13	5.69333e-13	2.15361e-60	6.7015e-60	5.51134e-36	1.01819e-34	2.08809e-36	2.21008e-35
L	43	A	1.67306e-40	1.76552e-40	3.68855e-23	5.41457e-23	5.55828e-19	2.04309e-18	7.86333e-20	8.55801e-20	0.12359	0.0779755	3.62656e-19	5.52995e-19
L	43	C	0.315497	0.105745	0.606349	0.199269	0.386531	0.726651	0.395831	0.120541	0.574527	0.219299	0.51007	0.189885
L	43	D	1.25041e-97	4.08812e-97	4.24487e-50	1.45989e-49	2.4486e-49	2.85014e-48	9.70519e-41	1.80185e-40	8.36122e-17	2.32868e-16	1.20453e-43	4.83527e-42
L	43	E	2.81455e-88	6.17138e-88	5.70258e-41	1.34593e-40	4.60222e-49	5.22629e-48	1.10038e-53	2.82687e-53	1.99047e-30	2.62663e-29	2.83183e-35	2.46549e-34
L	43	F	1.42283e-15	1.23461e-15	3.82712e-17	5.19071e-17	0.408435	0.736126	0.331964	0.102505	0.637968	0.238424	0.334633	0.135611
L	43	G	1.10156e-70	1.60065e-70	7.98064e-43	2.07706e-42	1.49162e-29	6.67782e-29	2.79505e-33	4.03609e-33	2.68497e-16	6.95374e-16	1.26789e-36	1.42583e-35
L	43	H	2.77294e-73	4.30247e-73	1.13744e-41	2.83763e-41	2.27448e-33	1.12659e-32	8.17913e-31	1.09518e-30	5.73479e-15	1.333e-14	1.87889e-17	2.65502e-17
L	43	I	0.73706	0.176863	0.69766	0.221141	0.885575	0.818643	5.02435e-10	4.80541e-10	9.77349e-12	1.72509e-11	1	0.327347
L	43	K	2.6682e-102	1.00725e-101	1.36944e-45	4.09542e-45	1.60544e-58	4.0772e-57	3.24286e-37	5.32682e-37	1.78937e-14	3.8439e-14	2.54435e-37	3.43357e-36
L	43	M	0.582028	0.148312	0.794972	0.24458	0.622002	0.780024	0.781774	0.21804	0.919709	0.316408	0.766255	0.265994
L	43	N	4.07748e-80	7.21292e-80	3.19838e-38	6.75426e-38	1.19065e-43	8.7994e-43	1.53346e-36	2.44617e-36	5.58274e-20	2.2751e-19	3.5438e-18	5.14227e-18
L	43	P	2.10767e-77	3.44544e-77	2.81501e-38	5.97086e-38	6.6417e-41	4.2361e-40	1.23689e-44	2.60258e-44	3.7261e-18	1.19372e-17	2.78388e-48	1.8784e-46
L	43	Q	2.62376e-102	1.00079e-101	9.90994e-68	9.73773e-67	1.63849e-53	2.63061e-52	3.10903e-62	1.07327e-61	1.81808e-13	3.66414e-13	6.26719e-23	1.16655e-22
L	43	R	1.08313e-74	1.69495e-74	3.13664e-43	8.29804e-43	3.1383e-33	1.53809e-32	7.00621e-24	8.25552e-24	0.0453104	0.046078	3.84884e-19	5.85235e-19
L	43	S	1.37684e-87	2.94834e-87	1.16488e-50	4.03504e-50	1.10548e-38	6.43382e-38	1.92299e-35	2.971e-35	8.27373e-15	1.86406e-14	1.46201e-26	3.57099e-26
L	43	T	1.04151e-68	1.4782e-68	6.71653e-34	1.2112e-33	1.52116e-36	8.23544e-36	0.00118714	0.00099348	0.0576323	0.0531477	1.84142e-17	2.60889e-17
L	43	V	0.177002	0.0810157	0.315352	0.141961	0.389388	0.727597	0.232844	0.0743397	0.576301	0.219523	1	0.327347
L	43	W	1.78829e-48	2.01486e-48	8.12103e-23	1.18132e-22	2.16331e-24	8.70804e-24	2.80425e-29	3.65519e-29	1	0.333675	1.23323e-42	4.43004e-41
L	43	Y	1.45708e-50	1.65698e-50	5.17122e-25	7.90432e-25	2.88732e-27	1.21842e-26	2.60511e-21	2.93651e-21	0.163375	0.0892099	4.07753e-20	6.57024e-20
G	44	A	0.00334196	0.0023716	0.11858	0.100696	9.72917e-10	3.10265e-09	1.94917e-09	1.84033e-09	0.00570199	0.00705409	9.09721e-08	9.76268e-08
G	44	C	0.402323	0.117738	0.628974	0.204209	0.494026	0.765105	0.754498	0.211407	0.791747	0.279881	0.823462	0.281699
G	44	D	6.03525e-22	5.51114e-22	7.00145e-10	8.49141e-10	1.3653e-13	4.61753e-13	0.000308513	0.00026419	0.0765722	0.0619639	1.60821e-19	2.51625e-19
G	44	E	4.00754e-24	3.734e-24	2.98402e-16	3.95802e-16	1.03352e-09	3.2884e-09	1.08703e-08	1.01764e-08	0.0271205	0.030489	3.47051e-06	3.6376e-06
G	44	F	2.34399e-35	2.37103e-35	9.71172e-14	1.25363e-13	3.22407e-23	1.26144e-22	1.08376e-20	1.20321e-20	1.40908e-10	2.3382e-10	1.14488e-11	1.33767e-11
G	44	H	1.12696e-25	1.05812e-25	5.32378e-16	7.04208e-16	3.00072e-11	9.81585e-11	8.72708e-18	9.2254e-18	0.190296	0.0964946	2.09287e-15	2.79634e-15
G	44	I	7.41182e-65	9.90523e-65	4.87351e-35	9.20204e-35	1.41053e-31	6.56739e-31	1.1452e-36	1.8401e-36	6.93135e-16	1.73044e-15	1.46836e-38	2.64204e-37
G	44	K	3.6358e-09	2.88794e-09	3.91439e-10	4.79572e-10	0.0549969	0.141995	0.0167775	0.00939598	0.0113223	0.0135241	0.320432	0.131335
G	44	L	0.0434979	0.0279928	0.168218	0.121456	0.155427	0.36365	0.0150737	0.00875239	0.128799	0.0796132	1.67011e-09	1.85498e-09
G	44	M	1.40303e-08	1.10723e-08	0.476506	0.172504	4.38149e-13	1.46763e-12	0.017947	0.00982675	0.120543	0.0771467	0.068189	0.0501473
G	44	N	0.488754	0.131984	0.792548	0.24399	0.498383	0.765105	0.635524	0.182586	1	0.333675	1	0.327347
G	44	P	1.04083e-56	1.25371e-56	8.04219e-28	1.29505e-27	1.40569e-30	6.45873e-30	6.08939e-38	1.02699e-37	6.92884e-17	1.96933e-16	1.15119e-22	2.08526e-22
G	44	Q	0.110681	0.0630994	0.391785	0.155003	0.17899	0.413242	0.573114	0.167266	0.806152	0.28386	0.557852	0.204987
G	44	R	0.130287	0.0694441	0.541628	0.18601	1	0.838913	0.108738	0.0378032	0.371513	0.152522	0.15533	0.0791004
G	44	S	0.00212443	0.00152832	0.0367776	0.0370457	0.0116455	0.0323387	0.036048	0.016171	0.480824	0.188598	3.16022e-18	4.59804e-18
G	44	T	5.33377e-65	7.15421e-65	1.29057e-17	1.76531e-17	5.25141e-49	5.86809e-48	1.8727e-25	2.2486e-25	0.0342464	0.0371438	4.57756e-19	6.94085e-19
G	44	V	3.88782e-76	6.2167e-76	2.74366e-34	5.02293e-34	1.06525e-43	7.91455e-43	3.4002e-29	4.41894e-29	1.23629e-06	1.7435e-06	9.35453e-29	3.11699e-28
G	44	W	3.46405e-62	4.40435e-62	6.65293e-25	1.0137e-24	6.12451e-39	3.59439e-38	1.29827e-27	1.63437e-27	6.95254e-11	1.17123e-10	2.84324e-18	4.14803e-18
G	44	Y	8.50717e-96	2.57448e-95	1.97253e-23	2.93131e-23	3.41387e-74	1.70302e-72	9.84499e-28	1.24647e-27	0.123202	0.0779755	8.84953e-48	4.77694e-46
I	45	A	6.25648e-52	7.22705e-52	2.65992e-23	3.91655e-23	2.3289e-30	1.06655e-29	1.27018e-22	1.47311e-22	8.8169e-07	1.25298e-06	1.42353e-26	3.49279e-26
I	45	C	0.0402557	0.0260897	0.197372	0.127884	0.119709	0.286315	0.00661147	0.00472718	0.0150794	0.0178961	0.0970791	0.0606113
I	45	D	6.27351e-73	9.69287e-73	1.99367e-36	3.88632e-36	2.66979e-38	1.53462e-37	8.36061e-19	8.96671e-19	4.45993e-12	8.07791e-12	1.12322e-19	1.76767e-19
I	45	E	3.24461e-70	4.67755e-70	1.15112e-34	2.14824e-34	2.53249e-37	1.42635e-36	1.59199e-28	2.03309e-28	1.76049e-09	2.77194e-09	3.47781e-27	9.29358e-27
I	45	F	2.73884e-48	3.07637e-48	1.36043e-12	1.71923e-12	2.47488e-37	1.39955e-36	4.05096e-53	1.01412e-52	1.47409e-48	5.83565e-47	4.49049e-06	4.65248e-06
I	45	G	4.5652e-48	5.11214e-48	1.05315e-24	1.59458e-24	4.14219e-25	1.69174e-24	3.54963e-30	4.69601e-30	5.57836e-11	9.42595e-11	1.00892e-32	5.98474e-32
I	45	H	1.27517e-64	1.6918e-64	4.38326e-28	7.10597e-28	2.49682e-38	1.44113e-37	2.2357e-27	2.79854e-27	3.1998e-08	4.81912e-08	5.10785e-29	1.74506e-28
I	45	K	3.37772e-42	3.6485e-42	4.58643e-20	6.45701e-20	8.80228e-24	3.48298e-23	7.58387e-22	8.68153e-22	1.67932e-11	2.91766e-11	7.27981e-12	8.52409e-12
I	45	L	0.553687	0.143261	0.934115	0.27746	0.483129	0.765105	0.863318	0.236646	0.698909	0.254506	0.833251	0.284135
I	45	M	3.64448e-14	3.08917e-14	6.37762e-05	6.89768e-05	3.39224e-11	1.10707e-10	6.87389e-17	7.16357e-17	0.000265983	0.000343928	3.02567e-24	5.96073e-24
I	45	N	1.91202e-79	3.31819e-79	5.21924e-56	2.11175e-55	6.00762e-39	3.54067e-38	1.18519e-27	1.49628e-27	5.45531e-08	8.14963e-08	4.41548e-26	1.00145e-25
I	45	P	1.34185e-77	2.20338e-77	1.55358e-38	3.32456e-38	7.27366e-41	4.61808e-40	1.15531e-61	3.83832e-61	8.37582e-21	3.71373e-20	1.42228e-20	2.34066e-20
I	45	Q	6.25672e-51	7.15957e-51	1.86803e-24	2.80195e-24	3.96752e-28	1.70517e-27	1.19601e-12	1.19565e-12	2.87123e-06	3.96841e-06	1.7522e-18	2.59131e-18
I	45	R	7.01225e-58	8.58769e-58	2.09508e-27	3.31825e-27	2.58289e-32	1.23553e-31	1.52384e-34	2.29026e-34	2.41443e-13	4.83089e-13	3.84846e-29	1.33165e-28
I	45	S	1.07858e-64	1.43618e-64	8.08027e-40	1.76842e-39	1.46024e-26	6.10671e-26	9.26145e-23	1.07693e-22	7.65046e-12	1.36339e-11	4.92276e-25	1.01812e-24
I	45	T	0.038451	0.0250086	0.165751	0.120382	0.125577	0.299325	7.77456e-07	7.06858e-07	0.0739127	0.0607788	9.61806e-20	1.52252e-19
I	45	V	0.542935	0.141662	0.444442	0.16666	0.87727	0.816642	0.313966	0.0974922	0.307335	0.131757	0.736913	0.258123
I	45	W	2.38616e-67	3.29719e-67	4.53924e-35	8.60463e-35	4.64724e-34	2.3434e-33	1.38237e-34	2.08472e-34	3.50504e-22	1.79871e-21	1.96404e-24	3.89771e-24
I	45	Y	1.08297e-56	1.30019e-56	8.31277e-30	1.37542e-29	1.24354e-28	5.44503e-28	5.74827e-24	6.79138e-24	4.63231e-06	6.3236e-06	1.15075e-30	5.09154e-30
S	46	A	0.325923	0.107132	0.276874	0.137575	0.733305	0.790181	0.052014	0.0211438	0.203221	0.0999648	0.139345	0.0740331
S	46	C	0.205815	0.0869257	0.178491	0.124552	0.631216	0.780145	0.0652001	0.024879	0.205762	0.10048	0.179311	0.0868863
S	46	D	0.65268	0.160615	0.604564	0.198882	0.868584	0.811524	0.618456	0.178146	0.727455	0.261536	0.760557	0.264868
S	46	E	0.482794	0.13076	0.368436	0.150976	0.888511	0.818643	0.256937	0.0811524	0.601027	0.227689	0.277617	0.11706
S	46	F	0.950336	0.214016	0.665155	0.212799	0.771268	0.793209	0.218813	0.0702662	0.287672	0.12564	0.51898	0.192281
S	46	G	0.417594	0.120499	0.331662	0.143606	0.820636	0.802955	0.0678534	0.0256331	0.140036	0.0834544	0.292557	0.121571
S	46	H	0.33262	0.108072	0.402937	0.156869	0.570397	0.778563	0.135237	0.0454426	0.311951	0.133098	0.266442	0.113336
S	46	I	0.358288	0.111748	0.281266	0.137999	0.79028	0.795284	0.340177	0.104675	0.542127	0.209092	0.464522	0.176582
S	46	K	0.0996798	0.0581216	0.122851	0.10305	0.402184	0.731715	0.0334923	0.0154319	0.0877927	0.0668843	0.229999	0.102582
S	46	L	0.653484	0.160705	0.974518	0.286807	0.589865	0.778563	0.560615	0.16416	0.566884	0.216979	0.829926	0.283359
S	46	M	0.562756	0.144914	0.725486	0.228009	0.627635	0.780024	0.0996681	0.0351758	0.26421	0.118092	0.231962	0.10311
S	46	N	0.327105	0.107192	0.267201	0.135424	0.741472	0.793209	0.0688201	0.0258144	0.27351	0.121358	0.138225	0.0736809
S	46	P	0.00723878	0.00497641	0.0708726	0.0663893	0.0538929	0.13966	3.23492e-16	3.34756e-16	0.0693006	0.0589091	8.49666e-30	3.32352e-29
S	46	Q	0.130203	0.0694441	0.141345	0.110421	0.483809	0.765105	0.0203427	0.0107779	0.123696	0.0779755	0.0789252	0.0542029
S	46	R	0.0615991	0.0384917	0.163359	0.120084	0.193644	0.440656	0.00303058	0.00239985	0.0302638	0.0333463	0.0471388	0.0398731
S	46	T	5.69062e-07	4.44301e-07	1.52999e-08	1.80556e-08	0.6008	0.778563	0.00494393	0.00374069	0.0545981	0.0518008	0.0408388	0.0359032
S	46	V	0.242718	0.093457	0.246817	0.133116	0.584631	0.778563	0.0276282	0.0135982	0.126093	0.0787883	0.114313	0.0661367
S	46	W	0.428111	0.122281	0.584201	0.195532	0.551891	0.775529	0.175199	0.0571328	0.342901	0.143772	0.336606	0.136104
S	46	Y	0.292917	0.101302	0.267604	0.135486	0.675863	0.785994	0.0582504	0.0229607	0.203272	0.0999648	0.156845	0.0795714
Y	47	A	0.775125	0.183322	0.825718	0.252426	0.559226	0.778009	0.733879	0.206546	0.619875	0.232809	0.904802	0.305064
Y	47	C	0.642642	0.158678	0.473509	0.171766	1	0.838913	0.770246	0.215137	0.757794	0.269889	0.482376	0.181452
Y	47	D	0.0498739	0.0318676	0.0029797	0.00313935	0.0866787	0.210927	3.83627e-10	3.68505e-10	0.00339168	0.00421476	0.000631124	0.00063441
Y	47	E	0.00372814	0.00263544	0.576195	0.193736	0.0174774	0.0479612	1.02153e-11	1.0053e-11	3.14922e-05	4.19569e-05	8.07699e-20	1.28611e-19
Y	47	F	0.748496	0.178718	0.908053	0.271561	0.586067	0.778563	0.908569	0.247396	0.95673	0.325128	0.946149	0.317028
Y	47	G	0.304874	0.103373	0.911985	0.272568	0.184721	0.423672	0.297781	0.0929893	0.676629	0.24936	0.202321	0.0935836
Y	47	H	0.65678	0.161299	0.927669	0.276056	0.621924	0.780024	0.713734	0.20139	0.683473	0.250977	0.918125	0.30917
Y	47	I	0.48078	0.130684	0.584881	0.195532	0.631553	0.780145	1	0.265705	0.836356	0.291899	0.742626	0.259292
Y	47	K	1.1613e-13	9.73091e-14	0.839294	0.255926	2.0194e-16	7.06937e-16	0.545918	0.160281	0.554405	0.213234	0.815311	0.279646
Y	47	L	0.251262	0.0948267	0.40617	0.157534	0.429448	0.752633	0.193797	0.0626885	0.396217	0.160994	0.301745	0.124717
Y	47	M	0.00349526	0.00247559	0.105717	0.0927158	0.00103435	0.00299125	0.147083	0.0489393	0.401281	0.162813	0.201868	0.0935836
Y	47	N	0.177531	0.0810569	0.137346	0.109494	0.65601	0.785994	0.0166661	0.00935731	0.111244	0.0739865	0.073047	0.0521977
Y	47	P	0.276892	0.0993836	0.734616	0.230128	0.250929	0.553705	0.494509	0.147044	0.922172	0.316862	0.311493	0.128157
Y	47	Q	1	0.222329	0.392385	0.155113	0.364107	0.704658	0.0179124	0.00981998	0.700724	0.254929	0.0809944	0.0549005
Y	47	R	0.345393	0.110266	0.936111	0.277881	0.222549	0.500571	0.373658	0.114182	0.801013	0.282515	0.277436	0.11706
Y	47	S	0.813596	0.189879	0.751938	0.234638	0.944693	0.833337	0.814533	0.225794	0.696762	0.254218	0.889074	0.300512
Y	47	T	0.624342	0.155101	0.437339	0.164447	0.981926	0.838913	0.269829	0.0849813	0.340394	0.143031	0.578075	0.211125
Y	47	V	0.925351	0.209767	0.617386	0.201807	0.744619	0.793209	0.409665	0.12424	0.432647	0.173633	0.81497	0.279646
Y	47	W	1.67252e-16	1.46167e-16	0.0191191	0.01967	1.60681e-16	5.63915e-16	0.000603115	0.000511176	6.59208e-08	9.79504e-08	0.0214545	0.0205338
G	48	A	4.85036e-26	4.58937e-26	0.208131	0.130484	3.64713e-28	1.57231e-27	0.0400934	0.0174565	0.14822	0.0849857	0.152871	0.0784555
G	48	C	0.829152	0.192405	0.819271	0.250933	0.918485	0.826789	0.188408	0.0611693	0.314886	0.134246	0.41723	0.16176
G	48	D	1	0.222329	0.99642	0.290401	1	0.838913	0.0948052	0.0336747	0.353914	0.146929	0.120666	0.0682758
G	48	E	0.324132	0.107049	0.210179	0.130768	0.860403	0.808315	0.62934	0.181163	0.679265	0.250147	0.848079	0.288826
G	48	F	0.590678	0.14958	0.436422	0.164293	1	0.838913	6.88518e-39	1.20728e-38	2.33524e-41	5.88304e-40	0.356167	0.142307
G	48	H	0.286108	0.101156	0.260565	0.134709	0.65176	0.785994	0.0103969	0.00661966	0.117211	0.0759654	0.039899	0.035307
G	48	I	0.248383	0.0944401	0.287614	0.138482	0.53464	0.77067	0.0282508	0.0138088	0.130916	0.0801045	0.117589	0.0673108
G	48	K	0.28703	0.101156	0.189406	0.127191	0.802638	0.799094	4.47475e-55	1.19111e-54	6.06321e-57	3.05494e-55	0.0734748	0.0522057
G	48	L	0.12912	0.0691236	0.175968	0.123868	0.40232	0.731715	0.00982964	0.00638736	0.0712533	0.059654	0.0678715	0.0501234
G	48	M	6.86876e-20	6.17979e-20	7.10342e-22	1.02095e-21	0.425679	0.752633	0.00877689	0.00583623	0.0903814	0.0683388	0.0420776	0.0366343
G	48	N	0.28896	0.10121	0.210213	0.130768	0.761037	0.793209	0.0546333	0.0219861	0.144211	0.0843109	0.220336	0.0995284
G	48	P	0.259026	0.0959652	0.228499	0.131943	0.658801	0.785994	0.0714975	0.0266154	0.170198	0.091671	0.2497	0.10837
G	48	Q	0.22039	0.0892899	0.203925	0.128734	0.613341	0.778563	0.0466603	0.0195244	0.0968695	0.0709822	0.283375	0.118761
G	48	R	0.218166	0.0892873	0.152735	0.115465	0.732623	0.790181	3.0197e-17	3.16186e-17	0.0880163	0.0668843	8.33603e-18	1.18727e-17
G	48	S	0.259191	0.0959652	0.212871	0.131004	0.690663	0.785994	0.0373297	0.0166111	0.175801	0.0931302	0.108413	0.0636789
G	48	T	0.526309	0.139018	0.322602	0.142896	0.956518	0.833991	0.00677391	0.00481993	0.0705537	0.0592644	0.0430834	0.0371702
G	48	V	0.161792	0.0776414	0.146585	0.112408	0.561672	0.778563	0.00632984	0.00457766	0.0393462	0.0414581	0.0881276	0.0577166
G	48	W	0.470994	0.12974	0.40159	0.15682	0.813222	0.801623	0.00881381	0.00584766	0.0652904	0.0564526	0.064943	0.0486888
G	48	Y	0.327217	0.107192	0.324949	0.143244	0.65603	0.785994	0.0622347	0.0240635	0.235981	0.109147	0.146792	0.0767805
R	49	A	0.168479	0.0790144	0.217279	0.131004	0.446005	0.764386	1	0.265705	0.978086	0.331144	1	0.327347
R	49	C	1.81891e-06	1.40812e-06	2.08025e-08	2.44295e-08	0.829344	0.803292	1	0.265705	0.691195	0.252693	0.574671	0.210308
R	49	D	0.787961	0.185671	0.166852	0.120807	0.0336533	0.0895362	1.12093e-17	1.18211e-17	2.69526e-07	3.89011e-07	2.36904e-19	3.6537e-19
R	49	E	0.116987	0.0654688	0.697247	0.221141	0.221496	0.499005	5.53885e-32	7.72063e-32	1.99145e-07	2.88935e-07	0.00454002	0.00444769
R	49	F	0.799205	0.187236	0.481101	0.173347	0.76257	0.793209	0.803637	0.223054	0.627906	0.23514	0.92541	0.311041
R	49	G	0.798058	0.187087	0.54877	0.187926	0.85478	0.806176	0.386436	0.117924	0.718168	0.259305	0.380122	0.149445
R	49	H	1	0.222329	0.657705	0.210976	0.68325	0.785994	0.403928	0.122732	0.671558	0.247968	0.44374	0.169638
R	49	I	0.776527	0.183449	0.320213	0.14223	0.497723	0.765105	0.84047	0.231676	0.618144	0.23247	0.766234	0.265994
R	49	K	0.0901085	0.0538264	0.154463	0.116205	0.303263	0.640839	0.00681848	0.00484384	0.0675893	0.057988	0.0454656	0.038894
R	49	L	0.709657	0.171751	1	0.290401	1	0.838913	0.751517	0.210705	0.806827	0.283918	0.335773	0.135926
R	49	M	0.565411	0.145189	0.415703	0.158979	0.953694	0.833337	0.890121	0.243265	0.833055	0.291114	0.623207	0.225321
R	49	N	0.819599	0.190948	0.507851	0.178744	0.759988	0.793209	0.919894	0.249216	0.676678	0.24936	0.741792	0.259169
R	49	P	0.896665	0.204572	0.561384	0.190217	0.711313	0.785994	0.842412	0.232067	0.698778	0.254506	0.891249	0.301059
R	49	Q	0.188117	0.083093	0.152457	0.115465	0.683188	0.785994	0.921842	0.249591	0.872903	0.303128	1	0.327347
R	49	S	0.403682	0.117772	0.251828	0.133243	0.949237	0.833337	0.672176	0.191128	0.892714	0.308461	0.369973	0.146307
R	49	T	0.276432	0.0993355	0.285753	0.138333	0.599073	0.778563	0.851347	0.233945	0.78089	0.277294	1	0.327347
R	49	V	0.346009	0.11028	0.171193	0.122245	0.92035	0.826789	0.663165	0.189052	0.744895	0.265837	0.779659	0.269607
R	49	W	0.62039	0.154435	0.925539	0.275934	1	0.838913	0.118414	0.0404352	1	0.333675	0.228746	0.102215
R	49	Y	0.394694	0.116367	0.187315	0.126849	0.923238	0.826884	0.30238	0.0942416	0.475486	0.187034	0.465644	0.176636
K	50	A	0.913507	0.207692	0.905759	0.271044	0.810349	0.80019	0.57482	0.167653	0.905361	0.312454	0.436264	0.167611
K	50	C	0.564289	0.145105	0.839881	0.255943	0.57564	0.778563	0.114473	0.0393073	0.553609	0.213075	0.0395654	0.0351212
K	50	D	0.124171	0.0677718	0.301981	0.141164	0.267374	0.58354	8.97656e-06	7.96477e-06	0.0424358	0.0439639	0.00807701	0.00788414
K	50	E	0.0268783	0.0178624	0.228544	0.131943	0.0566367	0.145422	8.23204e-17	8.55877e-17	0.00233647	0.00292313	1.82895e-19	2.84512e-19
K	50	F	0.224768	0.0895691	0.468093	0.171088	0.339761	0.687	0.0367143	0.0164033	0.0310678	0.0341644	0.365361	0.144908
K	50	G	0.940614	0.212437	0.971364	0.286228	0.929857	0.828326	0.19161	0.0620268	0.623137	0.23367	0.127777	0.0705134
K	50	H	0.682218	0.16632	0.510901	0.179294	0.990087	0.838913	0.862157	0.236474	0.874074	0.303344	0.593763	0.215832
K	50	I	0.21935	0.0892899	0.582051	0.195159	0.258587	0.567912	0.00560709	0.00417103	0.0995419	0.0713144	1.71064e-12	2.04744e-12
K	50	L	0.453256	0.126214	0.95641	0.282716	0.336533	0.683336	0.0263671	0.0131499	0.214583	0.102811	6.25183e-12	7.3523e-12
K	50	M	0.521393	0.138149	0.774562	0.239987	0.2431	0.539841	0.00530026	0.00398302	0.0738319	0.0607788	1.73585e-11	2.01638e-11
K	50	N	0.925737	0.209767	0.940481	0.279006	0.873116	0.814669	0.204509	0.0659125	0.470406	0.185562	0.259762	0.111373
K	50	P	0.819741	0.190948	0.569362	0.192155	0.854282	0.806176	0.51869	0.153614	0.662272	0.244865	0.641039	0.22992
K	50	Q	0.867005	0.199045	0.48353	0.173542	0.300069	0.636981	0.366443	0.112055	0.459461	0.182413	0.596843	0.216805
K	50	R	0.139532	0.0726788	0.226987	0.131676	0.353149	0.698192	0.00459794	0.00352111	0.0530865	0.0507282	0.0383997	0.0343748
K	50	S	0.990403	0.221812	0.54431	0.186798	0.591096	0.778563	0.576144	0.167818	0.906421	0.312454	0.481611	0.181291
K	50	T	0.933035	0.210898	1	0.290401	0.90948	0.825992	0.0938732	0.0333705	0.281939	0.123721	4.4651e-14	5.64459e-14
K	50	V	0.53744	0.14099	0.874976	0.26413	0.319366	0.666797	0.587826	0.170546	0.613896	0.231615	0.815426	0.279646
K	50	W	0.327479	0.107192	0.632642	0.205123	0.385119	0.725698	0.0196398	0.0104809	0.203256	0.0999648	7.67826e-13	9.3139e-13
K	50	Y	0.116474	0.0654365	0.423257	0.1611	0.170596	0.397145	0.010008	0.0064558	0.137561	0.0825115	0.0225373	0.021456
K	51	A	0.473939	0.129899	0.412981	0.158598	0.80899	0.80019	0.608495	0.175749	0.64308	0.239334	0.797131	0.274418
K	51	C	0.606479	0.152608	1	0.290401	0.493752	0.765105	0.952648	0.256987	0.797265	0.281446	0.84428	0.287713
K	51	D	0.125673	0.0681757	0.222982	0.131037	0.327296	0.678675	0.0064925	0.0046602	0.0227915	0.025938	1.36522e-13	1.70194e-13
K	51	E	0.325291	0.107117	0.988631	0.290401	0.14046	0.331408	0.0157634	0.00899916	0.584655	0.221942	0.0855605	0.0568083
K	51	F	0.452265	0.126044	0.453226	0.168121	0.71652	0.785994	0.0774577	0.0284541	0.262763	0.117685	0.167238	0.0825933
K	51	G	0.588118	0.149241	0.929098	0.27631	0.412761	0.741054	0.634761	0.182486	0.558836	0.214315	1	0.327347
K	51	H	0.50426	0.134485	0.602904	0.198752	0.659356	0.785994	0.0665982	0.0253032	0.151632	0.0857545	0.264751	0.112973
K	51	I	0.339962	0.109254	0.388313	0.154774	0.588889	0.778563	0.458861	0.137369	0.906525	0.312454	0.356003	0.142307
K	51	L	0.689437	0.167522	0.482821	0.173486	0.918407	0.826789	0.460851	0.137778	0.795344	0.280947	0.380743	0.14958
K	51	M	8.41234e-26	7.91876e-26	0.46689	0.170951	2.83127e-29	1.25945e-28	0.892851	0.243833	1	0.333675	0.883573	0.299215
K	51	N	0.924425	0.209729	0.587545	0.196046	0.496497	0.765105	0.603722	0.174699	0.962757	0.326956	0.501685	0.187918
K	51	P	0.826433	0.192018	0.570319	0.192297	0.839588	0.803292	0.731343	0.205964	0.645276	0.239701	1	0.327347
K	51	Q	0.286399	0.101156	0.283858	0.138333	0.62024	0.780024	0.426941	0.129213	0.407955	0.165279	0.885087	0.29954
K	51	R	0.362066	0.112245	0.429531	0.162717	0.588188	0.778563	0.0747453	0.0276613	0.273926	0.121358	0.145718	0.0765901
K	51	S	0.518179	0.137397	0.354839	0.148448	0.981487	0.838913	0.568474	0.166131	1	0.333675	0.309432	0.127407
K	51	T	0.499818	0.133592	0.34102	0.145564	0.943454	0.833337	0.149426	0.0495696	0.253696	0.114756	0.398532	0.15499
K	51	V	0.361891	0.112245	0.306087	0.141286	0.756985	0.793209	0.169957	0.0556111	0.31054	0.132597	0.395322	0.154186
K	51	W	0.268894	0.098064	0.371742	0.151374	0.480816	0.765105	1.32988e-06	1.20416e-06	0.487036	0.19063	1.18272e-10	1.3526e-10
K	51	Y	0.503101	0.134274	0.483698	0.173542	0.766912	0.793209	0.0857405	0.0309779	0.21637	0.103187	0.240543	0.105479
R	52	A	0.643847	0.158762	0.591713	0.196312	0.880065	0.817874	0.65991	0.188246	0.469086	0.185305	0.963195	0.322336
R	52	C	0.865206	0.198885	0.714905	0.225568	0.935322	0.831061	0.583439	0.169831	1	0.333675	0.339323	0.136792
R	52	D	0.0353093	0.0230883	0.524847	0.182459	0.0277871	0.0744967	9.06341e-22	1.03217e-21	1.15641e-14	2.54333e-14	2.09826e-21	3.56173e-21
R	52	E	0.127865	0.0688548	0.361664	0.149344	0.233044	0.520822	1.05226e-10	1.01965e-10	0.00105321	0.00132665	7.70269e-16	1.04207e-15
R	52	F	0.828477	0.192371	0.616539	0.201667	0.892937	0.820017	2.3067e-10	2.22061e-10	0.705658	0.256291	1.34102e-12	1.61219e-12
R	52	G	0.663397	0.162692	0.469379	0.171341	0.944287	0.833337	0.137826	0.0462071	0.341377	0.143335	0.511932	0.190242
R	52	H	2.39218e-14	2.03711e-14	0.66131	0.211991	7.0025e-19	2.56048e-18	0.834175	0.230228	0.583417	0.221624	0.677945	0.240315
R	52	I	1.11491e-08	8.81758e-09	0.45318	0.168121	3.6656e-10	1.1852e-09	0.852026	0.233986	1	0.333675	0.791444	0.272808
R	52	K	0.368141	0.112836	0.229776	0.132104	0.942015	0.833337	6.10161e-19	6.55987e-19	0.245523	0.112182	1.51217e-20	2.48104e-20
R	52	L	0.473475	0.129869	0.353466	0.148448	0.883305	0.818643	0.877082	0.240121	0.950461	0.323772	0.749208	0.261421
R	52	M	0.544887	0.14191	0.455633	0.168252	0.877569	0.816642	0.756129	0.21173	0.808608	0.28429	0.849143	0.289006
R	52	N	0.953147	0.214517	0.624804	0.203679	0.716232	0.785994	0.72548	0.204443	0.93002	0.318864	0.634758	0.228703
R	52	P	5.04829e-11	4.09881e-11	0.486701	0.173906	1.30253e-16	4.61765e-16	0.157108	0.0517681	0.310276	0.132587	0.338345	0.136602
R	52	Q	0.53279	0.140356	0.325172	0.143244	0.949226	0.833337	0.639918	0.183729	0.805581	0.28384	0.670114	0.238133
R	52	S	0.346807	0.110428	0.301942	0.141164	0.717465	0.785994	0.649464	0.185866	0.742155	0.265305	0.773696	0.267888
R	52	T	0.749732	0.178785	0.756425	0.235733	0.860762	0.808315	7.63364e-12	7.546e-12	0.875953	0.303806	3.91419e-16	5.33551e-16
R	52	V	0.74656	0.178442	1	0.290401	0.693782	0.785994	0.844489	0.23246	1	0.333675	0.763393	0.265342
R	52	W	0.368433	0.112836	0.293987	0.139347	0.759138	0.793209	0.431701	0.130297	0.684777	0.251176	0.471393	0.178315
R	52	Y	0.788611	0.185704	0.533932	0.184551	0.856782	0.806975	0.12909	0.0436761	0.214372	0.102811	0.387658	0.151855
R	53	A	0.471588	0.12974	0.238801	0.132932	0.858748	0.808282	0.0927101	0.0331169	0.348853	0.145811	0.147321	0.0768816
R	53	C	0.358588	0.111748	0.30933	0.141503	0.741729	0.793209	0.715612	0.201791	1	0.333675	0.626148	0.226217
R	53	D	4.46709e-10	3.58715e-10	0.0359714	0.0363859	1.48721e-14	5.12919e-14	8.79073e-12	8.6704e-12	5.05917e-06	6.88934e-06	1.00376e-15	1.35118e-15
R	53	E	2.41589e-11	1.97465e-11	8.71413e-09	1.03343e-08	0.000737753	0.00213794	8.52355e-26	1.04041e-25	2.59229e-09	4.04713e-09	1.66742e-26	4.01816e-26
R	53	F	0.770023	0.182501	0.637604	0.206315	0.369124	0.712139	0.265308	0.0836169	0.381256	0.155829	0.491331	0.184564
R	53	G	0.128891	0.0691024	0.132712	0.10743	0.494741	0.765105	0.0125614	0.00755165	0.0786345	0.0629796	0.0759826	0.0532663
R	53	H	0.425976	0.121861	0.446554	0.167192	0.680371	0.785994	0.429386	0.129776	0.784998	0.278001	0.392442	0.153395
R	53	I	0.753728	0.179219	0.56648	0.191405	1	0.838913	0.336246	0.10361	0.524473	0.203131	0.47347	0.178725
R	53	K	0.495121	0.132904	0.589524	0.196162	0.643852	0.784206	0.105748	0.0368752	0.186057	0.0953224	0.367591	0.145568
R	53	L	0.48377	0.130928	0.330163	0.143286	0.952527	0.833337	0.0928975	0.0331571	0.357392	0.14782	0.101456	0.0620506
R	53	M	1	0.222329	0.888237	0.267295	0.888511	0.818643	0.453199	0.13595	0.608814	0.230167	0.587852	0.213827
R	53	N	0.683578	0.16654	0.512341	0.179629	0.976732	0.838913	0.533545	0.157171	0.801312	0.282515	0.528315	0.194929
R	53	P	0.427019	0.122064	0.285324	0.138333	0.91657	0.826789	0.0815057	0.0297643	0.393907	0.160409	0.09808	0.0608542
R	53	Q	0.340839	0.109384	0.356425	0.148841	0.635231	0.781747	0.0475071	0.0198223	0.129832	0.0797754	0.20203	0.0935836
R	53	S	0.515527	0.136844	0.488275	0.173906	0.783966	0.793451	0.117817	0.0402939	0.296215	0.12816	0.242937	0.106356
R	53	T	0.220615	0.0892899	0.294363	0.139347	0.465764	0.765105	0.879222	0.240557	0.831885	0.2909	1	0.327347
R	53	V	0.620397	0.154435	0.66675	0.213167	0.771136	0.793209	0.908696	0.247396	0.821945	0.28814	0.577076	0.210902
R	53	W	0.667945	0.163493	0.627903	0.203999	0.280358	0.603392	0.198601	0.0641487	0.368987	0.151823	0.360656	0.143674
R	53	Y	0.884921	0.202397	0.514798	0.179925	0.706567	0.785994	0.586129	0.170501	0.734184	0.263031	0.612795	0.221854
Q	54	A	0.635254	0.157066	0.503741	0.177428	0.961936	0.836106	0.138661	0.0464518	0.350042	0.146086	0.248106	0.107961
Q	54	C	0.253551	0.0950299	0.334687	0.144267	0.491057	0.765105	0.0451462	0.0190532	0.199543	0.0996337	0.121716	0.0687256
Q	54	D	0.554546	0.143261	0.359591	0.149	0.993346	0.838913	1	0.265705	0.978675	0.331144	1	0.327347
Q	54	E	0.892307	0.203777	0.550367	0.188007	0.725761	0.786842	0.563077	0.164772	0.688015	0.251863	0.646727	0.231652
Q	54	F	0.62223	0.154682	0.495682	0.175452	0.949299	0.833337	0.1745	0.0569469	0.356653	0.147624	0.32925	0.133831
Q	54	G	0.291047	0.10121	0.247453	0.133116	0.701536	0.785994	0.00475036	0.00361279	0.0314846	0.0344178	0.0787084	0.0541261
Q	54	H	0.317714	0.105859	0.24827	0.133116	0.783779	0.793451	0.0345237	0.0157755	0.220253	0.10422	0.0762182	0.0533621
Q	54	I	0.455139	0.126546	0.51994	0.181015	0.656141	0.785994	0.124495	0.0423465	0.242685	0.111252	0.335915	0.135926
Q	54	K	0.209251	0.087669	0.260214	0.134709	0.477571	0.765105	0.0467303	0.0195351	0.157133	0.0876125	0.166488	0.0825933
Q	54	L	0.000166657	0.00012531	8.37578e-06	9.27082e-06	0.847092	0.805272	0.0908254	0.0324962	0.231733	0.107747	0.240454	0.105479
Q	54	M	0.430578	0.122318	0.425369	0.161595	0.70857	0.785994	0.0553659	0.0220998	0.260736	0.117011	0.111551	0.0650269
Q	54	N	0.35728	0.111627	0.354828	0.148448	0.666169	0.785994	0.0289995	0.0141123	0.176058	0.0931302	0.0810598	0.0549005
Q	54	P	0.421422	0.120936	0.279156	0.13785	0.926221	0.828256	0.0504782	0.0207233	0.258745	0.1164	0.100025	0.0614955
Q	54	R	0.35619	0.111477	0.285869	0.138333	0.769272	0.793209	0.03472	0.0158244	0.0969511	0.0709822	0.202321	0.0935836
Q	54	S	0.553797	0.143261	0.564776	0.191097	0.763131	0.793209	0.0187364	0.0101087	0.0822715	0.0648614	0.123268	0.0692012
Q	54	T	0.400755	0.117515	0.249228	0.133185	0.945593	0.833337	0.033958	0.0156166	0.0963907	0.0708527	0.196869	0.0922191
Q	54	V	6.30355e-14	5.31846e-14	0.305911	0.141286	7.37037e-16	2.5673e-15	0.0839861	0.0305173	0.222148	0.104607	0.212447	0.0968562
Q	54	W	0.445019	0.124966	0.46396	0.170397	0.686614	0.785994	0.252203	0.0797713	0.506243	0.196896	0.343568	0.1384
Q	54	Y	0.420134	0.120936	0.570904	0.192359	0.56645	0.778563	0.385087	0.117593	0.501853	0.195326	0.620132	0.224359
R	55	A	0.568747	0.145842	0.515673	0.179925	0.838518	0.803292	0.470716	0.140632	0.458983	0.182354	0.851057	0.289475
R	55	C	1.62222e-18	1.44179e-18	0.612178	0.200706	7.72576e-24	3.0657e-23	0.599042	0.173458	0.969861	0.328764	0.443738	0.169638
R	55	D	0.225038	0.0895691	0.750899	0.234541	0.178264	0.412248	0.027821	0.013644	0.235891	0.109147	1.74824e-12	2.08781e-12
R	55	E	0.135816	0.0715946	0.446977	0.16722	0.192792	0.440015	4.54124e-07	4.16313e-07	0.0313415	0.0343971	5.38137e-17	7.50603e-17
R	55	F	0.372758	0.113368	0.629437	0.204221	0.4735	0.765105	0.259715	0.0819128	0.654418	0.242123	0.14244	0.0751598
R	55	G	0.979696	0.219817	0.614864	0.201383	0.615711	0.778563	0.670726	0.190838	0.688783	0.251978	0.827576	0.282735
R	55	H	0.351642	0.110465	0.381485	0.153194	0.615817	0.778563	0.0551198	0.0220531	0.130784	0.0801045	0.241288	0.105719
R	55	I	0.633699	0.156893	0.723341	0.227633	0.756182	0.793209	1	0.265705	0.949459	0.323772	1.84779e-23	3.49975e-23
R	55	K	0.38354	0.114929	0.354436	0.148448	0.726122	0.786842	0.0135949	0.0080741	0.0772186	0.0621149	0.0883185	0.0577166
R	55	L	0.752753	0.179219	0.459496	0.169273	0.80108	0.799094	0.976418	0.262918	0.921949	0.316862	1	0.327347
R	55	M	0.920789	0.209033	0.618237	0.201811	0.529734	0.77067	0.767716	0.214566	0.7454	0.265847	1	0.327347
R	55	N	0.386167	0.11533	0.472247	0.171608	0.589616	0.778563	0.365779	0.111929	0.300117	0.129199	1	0.327347
R	55	P	0.781552	0.18449	0.968865	0.285667	0.751179	0.793209	0.988222	0.265705	0.742445	0.265305	0.752264	0.262318
R	55	Q	0.221838	0.0892899	0.197439	0.127884	0.634184	0.781747	0.587367	0.170546	0.687228	0.251835	0.762156	0.265228
R	55	S	1	0.222329	0.868939	0.262895	0.911217	0.825992	0.237932	0.0756909	0.192691	0.0972638	0.698147	0.246151
R	55	T	0.564901	0.14516	0.514824	0.179925	0.829819	0.803292	0.504676	0.149882	0.558786	0.214315	0.769258	0.266694
R	55	V	0.663784	0.162692	0.58801	0.196065	0.890603	0.819781	0.233215	0.0743507	0.649726	0.240764	0.179008	0.0868433
R	55	W	0.364952	0.112584	0.536243	0.18482	0.531725	0.77067	0.478517	0.142769	0.88533	0.306408	0.355084	0.14219
R	55	Y	0.941005	0.212437	0.693925	0.220683	0.816381	0.802739	0.100823	0.0354702	0.275159	0.121807	0.182234	0.087535
R	56	A	0.711205	0.172012	0.437513	0.164447	0.795765	0.798503	0.911902	0.247658	1	0.333675	0.860919	0.292277
R	56	C	0.933026	0.210898	0.753313	0.234915	0.902553	0.825082	0.817815	0.226562	0.968636	0.32855	0.781126	0.269769
R	56	D	0.609138	0.15288	0.535323	0.184634	0.891237	0.819781	0.238967	0.0759106	0.444639	0.177674	0.351666	0.141031
R	56	E	0.773602	0.183112	0.903725	0.27094	0.644673	0.784384	2.23615e-06	2.00423e-06	0.00284453	0.00355075	4.75627e-13	5.79552e-13
R	56	F	0.625633	0.155316	0.393426	0.155255	0.920437	0.826789	0.905782	0.246907	0.947965	0.323518	0.757549	0.263991
R	56	G	0.612622	0.153439	0.626312	0.203999	0.775156	0.793209	0.539368	0.158569	0.450082	0.179332	1	0.327347
R	56	H	0.585428	0.148971	0.433378	0.163659	0.976562	0.838913	0.149946	0.0497046	0.202984	0.0999648	0.579397	0.211464
R	56	I	0.90455	0.205858	0.891843	0.268202	0.954574	0.833337	0.646702	0.185196	0.709339	0.25729	0.795449	0.274014
R	56	K	0.173447	0.0801921	0.178123	0.124486	0.53449	0.77067	0.0774671	0.0284541	0.36203	0.149515	0.106361	0.0633441
R	56	L	0.557074	0.143653	0.395687	0.155651	0.972858	0.838913	0.675738	0.191894	0.618261	0.23247	1	0.327347
R	56	M	0.807502	0.188817	1	0.290401	0.770503	0.793209	0.823103	0.227741	1	0.333675	0.713675	0.25097
R	56	N	0.208591	0.0875931	0.198241	0.127884	0.591508	0.778563	0.218713	0.0702662	0.355901	0.147533	0.436738	0.167674
R	56	P	0.644359	0.158781	0.477241	0.17264	1	0.838913	0.296538	0.0926667	0.368424	0.151704	0.580696	0.211795
R	56	Q	0.378117	0.114296	0.372636	0.151374	0.68211	0.785994	0.321724	0.0996913	0.597752	0.226603	0.360389	0.143674
R	56	S	0.361657	0.112245	0.20546	0.129315	1	0.838913	0.159821	0.0525443	0.350563	0.146086	0.290977	0.121113
R	56	T	0.378085	0.114296	0.594687	0.196927	0.47899	0.765105	0.36153	0.110833	0.411857	0.166617	0.696863	0.246019
R	56	V	0.482021	0.130684	0.495944	0.175452	0.713317	0.785994	0.713304	0.20139	0.707633	0.256839	0.96462	0.322613
R	56	W	0.49272	0.132566	0.281407	0.137999	0.922586	0.826884	1	0.265705	0.784158	0.278001	0.804593	0.276634
R	56	Y	0.800439	0.187405	0.589941	0.196165	0.903179	0.825082	0.663718	0.189088	0.559149	0.214315	1	0.327347
R	57	A	0.268841	0.098064	0.372144	0.151374	0.483137	0.765105	0.110459	0.0382509	0.182471	0.0948702	0.395021	0.15418
R	57	C	0.750829	0.178878	0.871186	0.263236	0.793216	0.797091	0.629781	0.181172	0.638515	0.238468	1	0.327347
R	57	D	0.641555	0.158517	0.26855	0.13568	0.615534	0.778563	0.594403	0.172341	0.727433	0.261536	0.678035	0.240315
R	57	E	0.382512	0.114894	0.561974	0.190283	0.500891	0.765857	1	0.265705	0.917967	0.316005	0.901822	0.30425
R	57	F	0.498267	0.133275	0.361217	0.149288	0.912274	0.826365	0.546981	0.160487	0.486546	0.190572	1	0.327347
R	57	G	0.404082	0.117772	0.311594	0.141536	0.819863	0.802955	0.114841	0.0393981	0.175354	0.0931302	0.459015	0.174735
R	57	H	0.387804	0.11533	0.248903	0.133185	0.895563	0.821888	0.0299282	0.0143742	0.19236	0.0971853	0.0749945	0.0527792
R	57	I	0.556248	0.143541	0.403343	0.156869	0.953637	0.833337	0.485777	0.14474	0.730072	0.261897	0.515595	0.191414
R	57	K	0.3875	0.11533	0.309803	0.141503	0.786225	0.793451	0.0278092	0.013644	0.133641	0.0811162	0.110595	0.0645393
R	57	L	0.605353	0.152557	0.5695	0.192155	0.840794	0.803292	0.355432	0.109119	0.395947	0.160994	0.663621	0.236293
R	57	M	0.3765	0.114222	0.411132	0.158363	0.631694	0.780145	0.435423	0.131241	0.683321	0.250977	0.475475	0.179344
R	57	N	0.115426	0.0651251	0.139698	0.110086	0.429021	0.752633	0.099187	0.035034	0.252918	0.114687	0.243709	0.106607
R	57	P	0.611196	0.153186	0.615252	0.201383	0.802226	0.799094	0.239763	0.0760542	0.468734	0.185298	0.349117	0.140321
R	57	Q	0.494089	0.132837	0.323592	0.143106	0.986222	0.838913	0.078923	0.0288927	0.169985	0.0916452	0.266289	0.113336
R	57	S	0.22156	0.0892899	0.397834	0.155986	0.378732	0.723259	0.0549673	0.0220202	0.185483	0.0953224	0.171797	0.0842921
R	57	T	0.388594	0.11533	0.256613	0.134008	0.897309	0.822068	0.220686	0.0707137	0.390249	0.159036	0.397476	0.154802
R	57	V	0.255921	0.0955371	0.254027	0.133819	0.595079	0.778563	0.183339	0.0595672	0.362626	0.14965	0.347413	0.139741
R	57	W	0.870933	0.199571	0.357057	0.148847	0.473693	0.765105	0.199204	0.0642966	0.325414	0.137571	0.423395	0.163598
R	57	Y	0.370375	0.113203	0.346585	0.146923	0.706037	0.785994	0.438526	0.131996	0.431679	0.173548	0.818603	0.28038
A	58	C	0.749952	0.178785	0.561121	0.190217	0.951735	0.833337	0.175639	0.0572339	0.366771	0.151135	0.313497	0.128884
A	58	D	0.240566	0.0930196	0.226092	0.13157	0.613953	0.778563	0.0461155	0.019333	0.107743	0.0732693	0.257974	0.1108
A	58	E	0.147036	0.0746758	0.218718	0.131004	0.390159	0.727597	0.0913654	0.032663	0.240699	0.110679	0.21764	0.0988067
A	58	F	4.20701e-13	3.48531e-13	0.541292	0.18601	6.34007e-18	2.28241e-17	0.0405543	0.017589	0.228181	0.106801	0.0888026	0.0578928
A	58	G	0.238092	0.0924378	0.277835	0.137768	0.530296	0.77067	0.0309352	0.0147298	0.138494	0.0828026	0.118447	0.0675157
A	58	H	0.279398	0.0998135	0.24299	0.133116	0.689199	0.785994	0.081323	0.0297221	0.373315	0.152922	0.113822	0.0659235
A	58	I	0.37252	0.113368	0.448599	0.167643	0.58956	0.778563	0.0549324	0.0220202	0.128003	0.0794442	0.249855	0.10837
A	58	K	0.100391	0.0584433	0.0956067	0.0860346	0.492099	0.765105	0.0120813	0.00738358	0.069709	0.0591142	0.0861684	0.0570016
A	58	L	0.372095	0.113355	0.308823	0.141503	0.786805	0.793451	0.276068	0.0867607	0.386732	0.157951	0.511697	0.190242
A	58	M	0.184207	0.0824601	0.144858	0.111912	0.674452	0.785994	0.0266567	0.0132494	0.290621	0.126728	0.0418948	0.0365341
A	58	N	0.381852	0.114894	0.249929	0.133243	0.908216	0.825992	0.0841204	0.0305173	0.211324	0.102112	0.234236	0.103554
A	58	P	0.293295	0.101302	0.219109	0.131004	0.751705	0.793209	0.0825072	0.0300803	0.128564	0.0796132	0.437819	0.167969
A	58	Q	0.365874	0.112645	0.481911	0.173351	0.535666	0.771249	0.164353	0.053954	0.433588	0.173885	0.233807	0.103516
A	58	R	0.223394	0.0894005	0.218706	0.131004	0.598528	0.778563	0.0278932	0.0136642	0.159881	0.0887	0.088221	0.0577166
A	58	S	0.318899	0.106061	0.302275	0.141165	0.67138	0.785994	0.110596	0.0382683	0.188992	0.0964026	0.383262	0.150351
A	58	T	0.315076	0.105745	0.390867	0.155003	0.550658	0.775529	0.0214927	0.0112314	0.14247	0.0840016	0.0735025	0.0522057
A	58	V	0.258096	0.0959533	0.272606	0.136583	0.581657	0.778563	0.103743	0.0362951	0.218472	0.103668	0.290928	0.121113
A	58	W	0.283255	0.1007	0.431672	0.163178	0.451913	0.765105	0.0669985	0.0254334	0.195472	0.0982204	0.198062	0.0926456
A	58	Y	0.16966	0.079141	0.194765	0.127729	0.484572	0.765105	0.0162429	0.0091898	0.0871128	0.0668843	0.095505	0.0602907
H	59	A	0.409283	0.118662	0.32964	0.143286	0.815164	0.802739	0.118228	0.0404031	0.30762	0.131757	0.233958	0.103516
H	59	C	0.175031	0.080619	0.281863	0.138042	0.383427	0.725698	0.166767	0.0546249	0.471416	0.185828	0.2097	0.0962543
H	59	D	0.341863	0.109617	0.314104	0.141841	0.705535	0.785994	0.448543	0.134736	0.350438	0.146086	1	0.327347
H	59	E	0.204836	0.0867122	0.231657	0.132313	0.514809	0.77067	0.059286	0.0232445	0.168157	0.0909935	0.202761	0.0937065
H	59	F	0.337095	0.109043	0.40104	0.15682	0.570574	0.778563	0.0476953	0.0198634	0.184643	0.0952841	0.14318	0.0753295
H	59	G	0.432319	0.122622	0.378458	0.152232	0.774231	0.793209	0.100945	0.0354849	0.190813	0.0966683	0.376436	0.148212
H	59	I	0.611169	0.153186	0.457351	0.168742	1	0.838913	0.1294	0.0437469	0.202202	0.0999648	0.448854	0.171229
H	59	K	0.119479	0.0658227	0.0952552	0.0860346	0.582288	0.778563	0.061335	0.0238784	0.169121	0.0912685	0.21628	0.0984373
H	59	L	0.216643	0.0890341	0.225321	0.131501	0.557766	0.777575	0.144928	0.0483679	0.235883	0.109147	0.438743	0.168204
H	59	M	3.05305e-09	2.43034e-09	0.242291	0.133116	3.74809e-10	1.20908e-09	0.0342811	0.0157253	0.114392	0.0748201	0.166704	0.0825933
H	59	N	0.350967	0.110465	0.37711	0.151944	0.623184	0.780024	0.0185511	0.0100455	0.070015	0.0592437	0.142584	0.0751625
H	59	P	0.159054	0.0768786	0.159892	0.118275	0.531314	0.77067	0.030041	0.0144128	0.0944293	0.0702495	0.179667	0.0869325
H	59	Q	0.368746	0.112836	0.355385	0.148535	0.696385	0.785994	0.0182935	0.00994257	0.0595938	0.0540406	0.176247	0.0858701
H	59	R	0.182213	0.08217	0.140107	0.110228	0.648564	0.785994	0.017524	0.00971556	0.0701306	0.0592511	0.136634	0.0733094
H	59	S	0.302698	0.103012	0.221242	0.131037	0.785362	0.793451	0.0548075	0.0220202	0.221967	0.104607	0.128017	0.0705134
H	59	T	0.429485	0.122318	0.29512	0.139347	0.919581	0.826789	0.00996436	0.00644646	0.0474812	0.0473492	0.117905	0.067349
H	59	V	0.605846	0.152577	0.450119	0.167643	0.987408	0.838913	0.034655	0.0158192	0.119012	0.0763926	0.172528	0.0844331
H	59	W	0.465334	0.128502	0.24454	0.133116	0.909613	0.825992	0.0215036	0.0112314	0.16316	0.0891961	0.063098	0.0478829
H	59	Y	0.451038	0.12598	0.38445	0.154127	0.79981	0.799094	1.8729e-06	1.68549e-06	0.121174	0.0773716	2.51068e-10	2.85316e-10
Q	60	A	0.385231	0.115247	0.220659	0.131004	0.969668	0.838913	0.0355161	0.0160464	0.150026	0.0856325	0.132266	0.0719721
Q	60	C	0.583668	0.148627	0.535192	0.184634	0.842362	0.803696	0.0315966	0.0148972	0.140442	0.0835694	0.120022	0.0681382
Q	60	D	0.57287	0.146591	0.415378	0.158979	0.96447	0.836747	0.0461051	0.019333	0.220388	0.10422	0.105204	0.0632925
Q	60	E	0.263965	0.0972411	0.262019	0.134783	0.623693	0.780024	0.0372426	0.016589	0.0997593	0.0713144	0.229242	0.102352
Q	60	F	0.234471	0.0917247	0.23607	0.132932	0.581025	0.778563	0.0416148	0.0178535	0.203859	0.100164	0.106813	0.0633547
Q	60	G	0.280589	0.100044	0.191453	0.127221	0.780304	0.793451	0.0291737	0.0141503	0.178196	0.0936913	0.0817492	0.0550222
Q	60	H	0.220273	0.0892899	0.224428	0.131446	0.566006	0.778563	0.015967	0.00909187	0.0604475	0.0542983	0.153518	0.0784555
Q	60	I	0.180029	0.0818242	0.230044	0.132104	0.453769	0.765105	0.0415611	0.0178535	0.142197	0.0839299	0.164436	0.0818082
Q	60	K	0.221191	0.0892899	0.271356	0.136239	0.499995	0.765857	0.0674681	0.0255542	0.146555	0.0849641	0.279876	0.117569
Q	60	L	0.0922467	0.0548554	0.134274	0.10781	0.345086	0.69279	0.00848953	0.00570099	0.105355	0.0724999	0.0348764	0.0317162
Q	60	M	0.417034	0.120432	0.310581	0.141503	0.830259	0.803292	0.0347381	0.0158244	0.115641	0.0752528	0.17989	0.0869325
Q	60	N	0.362972	0.112245	0.37279	0.151374	0.662325	0.785994	0.0527499	0.0213448	0.213824	0.102783	0.134968	0.0727821
Q	60	P	0.298163	0.102229	0.228356	0.131943	0.76847	0.793209	0.0588678	0.0231628	0.292073	0.126962	0.106077	0.0632925
Q	60	R	0.317332	0.105828	0.201412	0.128452	0.887492	0.818643	0.0107155	0.00676404	0.0624269	0.0550941	0.0881521	0.0577166
Q	60	S	0.550353	0.142926	0.35885	0.149	1	0.838913	2.46232e-29	3.21899e-29	5.48657e-39	1.12624e-37	0.261188	0.111806
Q	60	T	0.248624	0.0944401	0.214129	0.131004	0.665802	0.785994	0.0104519	0.00663556	0.0988796	0.0711719	0.0479062	0.0402797
Q	60	V	0.209017	0.087669	0.23904	0.132932	0.527072	0.77067	0.0190259	0.0102274	0.0986289	0.0710838	0.100432	0.061605
Q	60	W	0.0692711	0.0425594	0.0883526	0.0813392	0.383337	0.725698	0.0860981	0.0310563	0.213504	0.102783	0.249948	0.10837
Q	60	Y	0.398979	0.117347	0.29827	0.140246	0.840525	0.803292	0.111116	0.0384183	0.294021	0.127509	0.227635	0.101972
N	61	A	0.294089	0.101339	0.444859	0.166687	0.458233	0.765105	0.0322061	0.0150629	0.114848	0.0748854	0.160406	0.0808461
N	61	C	0.448813	0.125838	0.553946	0.188829	0.617158	0.779421	0.177426	0.0577737	0.321476	0.136322	0.371898	0.146772
N	61	D	0.407954	0.118464	0.328816	0.143286	0.809096	0.80019	0.0605828	0.0236857	0.217611	0.103348	0.157486	0.0797471
N	61	E	0.081442	0.0492114	0.095636	0.0860346	0.396699	0.731715	0.0311625	0.0147902	0.100845	0.0714824	0.17059	0.0837888
N	61	F	0.221331	0.0892899	0.279074	0.13785	0.500537	0.765857	0.028061	0.0137312	0.164286	0.0895307	0.0864009	0.0570337
N	61	G	0.455913	0.126569	0.401542	0.15682	0.803484	0.799094	0.0381032	0.0168873	0.0838714	0.0656525	0.266104	0.113336
N	61	H	0.498209	0.133275	0.69087	0.219857	0.594188	0.778563	0.044203	0.0187806	0.117587	0.0759654	0.225903	0.101364
N	61	I	0.375824	0.114152	0.290689	0.138714	0.806774	0.799975	0.0258616	0.012971	0.128944	0.0796132	0.103725	0.0628397
N	61	K	0.312711	0.105343	0.285302	0.138333	0.677761	0.785994	0.011024	0.00689963	0.094801	0.0702762	0.0545024	0.0445759
N	61	L	0.322018	0.106807	0.377644	0.152032	0.567252	0.778563	0.0869053	0.0312964	0.227731	0.106782	0.233535	0.103516
N	61	M	0.421753	0.120936	0.559198	0.189743	0.557447	0.777575	0.0440383	0.0187287	0.150457	0.0856802	0.164313	0.0818082
N	61	P	0.192422	0.0838813	0.488171	0.173906	0.27807	0.600317	0.0694426	0.0260038	0.205226	0.10048	0.199202	0.092857
N	61	Q	0.344185	0.110072	0.243667	0.133116	0.821014	0.802955	0.0105829	0.00670472	0.061685	0.0547006	0.08849	0.0577588
N	61	R	0.628933	0.15603	0.404231	0.157087	0.91127	0.825992	0.0207411	0.0109366	0.126907	0.0792071	0.0826091	0.0552965
N	61	S	0.413376	0.119564	0.591044	0.196312	0.544025	0.772245	0.0675479	0.0255542	0.186573	0.0954801	0.20651	0.0951138
N	61	T	0.271933	0.0983946	0.222542	0.131037	0.720364	0.786091	0.0356123	0.0160571	0.13243	0.0807759	0.151085	0.0779682
N	61	V	0.869703	0.199414	0.492765	0.174841	0.691182	0.785994	0.947315	0.255705	0.726925	0.261536	0.735218	0.257873
N	61	W	0.316135	0.105745	0.455453	0.168252	0.474153	0.765105	0.0456624	0.019216	0.116338	0.0755904	0.236472	0.104201
N	61	Y	0.164663	0.078306	0.164878	0.120382	0.532985	0.77067	0.0570875	0.0225789	0.228971	0.107001	0.13486	0.0727821
S	62	A	0.127074	0.0685536	0.21335	0.131004	0.346695	0.69279	0.0108601	0.00681635	0.0449186	0.0457636	0.152305	0.0783771
S	62	C	0.128381	0.0690307	0.154127	0.116134	0.45154	0.765105	0.0260748	0.0130482	0.176268	0.0931302	0.0719032	0.0516879
S	62	D	0.0634266	0.0394317	0.130847	0.10642	0.24889	0.550075	0.00398342	0.00307718	0.0412847	0.04301	0.0462755	0.0394617
S	62	E	0.472467	0.129765	0.414837	0.158979	0.806272	0.799975	0.0523505	0.0212026	0.133373	0.0810525	0.235397	0.103923
S	62	F	0.127119	0.0685536	0.236756	0.132932	0.329605	0.678683	0.01518	0.00879104	0.0977398	0.0710148	0.0742758	0.0525475
S	62	G	0.128805	0.0691024	0.1013	0.089824	0.607083	0.778563	0.00827224	0.00557201	0.144022	0.0843109	0.0234614	0.0222572
S	62	H	0.209951	0.0878619	0.209257	0.130768	0.570254	0.778563	0.00411438	0.00316727	0.062892	0.0552733	0.0282699	0.0264407
S	62	I	0.197739	0.0846139	0.234028	0.132722	0.492332	0.765105	0.00265027	0.00214875	0.0407139	0.0425755	0.0279779	0.0262649
S	62	K	0.287809	0.101156	0.290191	0.138614	0.611802	0.778563	0.011697	0.00723882	0.0835991	0.0655353	0.0700667	0.050904
S	62	L	0.224953	0.0895691	0.246159	0.133116	0.556481	0.777575	0.0450416	0.0190454	0.266286	0.118924	0.0821048	0.0551241
S	62	M	0.190901	0.0834959	0.232697	0.132592	0.486981	0.765105	0.0278136	0.013644	0.299271	0.128978	0.0417097	0.0364315
S	62	N	0.387723	0.11533	0.317322	0.141961	0.772165	0.793209	0.0186883	0.0101074	0.108025	0.0732693	0.089035	0.0579621
S	62	P	0.151193	0.0757963	0.226259	0.13157	0.39	0.727597	0.0142402	0.00836742	0.0839856	0.0656525	0.0913322	0.0587612
S	62	Q	0.342417	0.109698	0.30568	0.141286	0.716448	0.785994	0.0118501	0.00730288	0.0992706	0.0713144	0.0548025	0.044686
S	62	R	0.152145	0.0757963	0.163153	0.120084	0.494965	0.765105	0.00760341	0.00523251	0.0483501	0.0480238	0.0799149	0.0546738
S	62	T	0.116816	0.0654688	0.151832	0.11531	0.402066	0.731715	0.0073065	0.00506036	0.0546656	0.0518008	0.0645544	0.0485323
S	62	V	0.206447	0.0869917	0.288226	0.138614	0.448308	0.765105	0.0165786	0.00932413	0.0859556	0.0668563	0.0956595	0.0602907
S	62	W	0.13628	0.0715946	0.121124	0.101957	0.547457	0.7744	0.0206705	0.0109123	0.108088	0.0732693	0.100303	0.061596
S	62	Y	0.246183	0.0941138	0.255157	0.134008	0.582846	0.778563	0.0571283	0.0225789	0.181157	0.0945418	0.180799	0.0872936
Q	63	A	0.223918	0.0895125	0.191564	0.127221	0.637066	0.782627	0.0670625	0.0254358	0.2266	0.106432	0.161357	0.0810612
Q	63	C	0.338345	0.109254	0.333981	0.144221	0.672468	0.785994	0.119921	0.0409185	0.283206	0.124179	0.268131	0.113791
Q	63	D	0.553086	0.143261	0.464344	0.170408	0.884525	0.818643	0.0389714	0.0171005	0.121651	0.0775872	0.188966	0.0892414
Q	63	E	0.255144	0.0954316	0.235193	0.132932	0.643966	0.784206	0.0177567	0.00976659	0.0750893	0.0614774	0.123292	0.0692012
Q	63	F	0.495045	0.132904	0.525862	0.182548	0.723279	0.786842	0.122832	0.0418149	0.254261	0.114756	0.332127	0.134696
Q	63	G	0.181081	0.0821654	0.15298	0.115465	0.605545	0.778563	0.0321821	0.0150629	0.200363	0.0998563	0.0787132	0.0541261
Q	63	H	0.266055	0.0975837	0.262632	0.134783	0.607999	0.778563	0.125199	0.0425223	0.230968	0.107569	0.360919	0.143674
Q	63	I	0.360223	0.112069	0.455317	0.168252	0.56496	0.778563	0.0835765	0.0303949	0.223673	0.105235	0.21666	0.0984444
Q	63	K	0.331628	0.107941	0.244987	0.133116	0.808096	0.80019	0.00340238	0.00267509	0.0377186	0.0400477	0.0410862	0.0360035
Q	63	L	0.173201	0.0801796	0.198128	0.127884	0.483982	0.765105	0.00557949	0.00416452	0.0357772	0.0385776	0.0878067	0.0576613
Q	63	M	0.435246	0.122976	0.663342	0.212427	0.532169	0.77067	0.025988	0.0130196	0.128994	0.0796132	0.105474	0.0632925
Q	63	N	0.256494	0.0956437	0.531503	0.183976	0.345258	0.69279	0.0350135	0.0159007	0.220314	0.10422	0.0808399	0.0549005
Q	63	P	0.287741	0.101156	0.271228	0.136239	0.636994	0.782627	0.0480365	0.0199866	0.204166	0.100227	0.123891	0.0693734
Q	63	R	0.251139	0.0948267	0.140772	0.11039	0.87705	0.816642	0.0171484	0.00955526	0.130946	0.0801045	0.06214	0.0476366
Q	63	S	0.367397	0.112768	0.338617	0.14502	0.703931	0.785994	0.0893313	0.0320135	0.212581	0.102541	0.244833	0.107012
Q	63	T	0.357822	0.111702	0.403166	0.156869	0.618464	0.780024	0.0614649	0.0238815	0.181738	0.0946124	0.198773	0.0927392
Q	63	V	0.217573	0.0892873	0.186437	0.126777	0.623324	0.780024	0.0171004	0.00954055	0.098405	0.0710148	0.0858796	0.0568802
Q	63	W	0.289643	0.10121	0.28633	0.138386	0.629459	0.780024	0.0635216	0.0244709	0.202834	0.0999648	0.183717	0.0878383
Q	63	Y	0.391383	0.115764	0.329673	0.143286	0.784818	0.793451	0.0959202	0.0340434	0.279327	0.123079	0.194125	0.0912785
T	64	A	0.405148	0.11793	0.37595	0.151858	0.72445	0.786842	1.52288e-10	1.46924e-10	0.109651	0.0735944	4.90748e-16	6.67263e-16
T	64	C	0.399814	0.117404	0.395251	0.155607	0.696607	0.785994	0.0290766	0.0141342	0.0908451	0.0684095	0.183664	0.0878383
T	64	D	0.167174	0.0788872	0.174726	0.123515	0.520963	0.77067	0.0683142	0.025712	0.200529	0.0998563	0.204529	0.094393
T	64	E	0.228639	0.0906084	0.342623	0.145989	0.436719	0.75718	0.0227687	0.0117332	0.122584	0.0779727	0.0926543	0.0593706
T	64	F	0.972307	0.218293	0.744645	0.232966	0.845654	0.804632	0.181091	0.0588802	0.319978	0.135791	0.391769	0.153243
T	64	G	0.540337	0.141328	0.52972	0.183623	0.775725	0.79321	0.0743824	0.0275501	0.17207	0.092053	0.260821	0.111738
T	64	H	0.420993	0.120936	0.307708	0.141503	0.887853	0.818643	0.068782	0.0258144	0.253952	0.114756	0.150144	0.0776008
T	64	I	0.26716	0.0977299	0.435573	0.16423	0.41787	0.746389	0.0348605	0.0158638	0.142647	0.0840165	0.138737	0.0738558
T	64	K	0.406506	0.118137	0.294616	0.139347	0.862135	0.808745	0.0226372	0.0116884	0.0844942	0.0659571	0.138997	0.0739211
T	64	L	0.333663	0.108273	0.389297	0.15491	0.589062	0.778563	0.0306181	0.0146019	0.152507	0.0860736	0.10599	0.0632925
T	64	M	0.252571	0.0949244	0.247692	0.133116	0.615921	0.778563	0.00728433	0.00505327	0.0460163	0.046459	0.0817126	0.0550222
T	64	N	0.429269	0.122318	0.306406	0.141286	0.931169	0.828966	0.0488767	0.0202344	0.142919	0.0840877	0.204596	0.094393
T	64	P	0.362366	0.112245	0.431767	0.163178	0.593483	0.778563	0.0387473	0.017083	0.244159	0.111651	0.0806763	0.0549005
T	64	Q	0.190524	0.0834711	0.248185	0.133116	0.46409	0.765105	0.0274038	0.0135446	0.113929	0.0746878	0.128511	0.070641
T	64	R	0.358886	0.111748	0.51569	0.179925	0.504769	0.765857	0.0112153	0.00700944	0.0541903	0.0516938	0.116161	0.0668039
T	64	S	0.339125	0.109254	0.38801	0.154774	0.59858	0.778563	0.0400568	0.0174565	0.093118	0.0697231	0.265151	0.113055
T	64	V	0.180105	0.0818242	0.21307	0.131004	0.48034	0.765105	0.032927	0.0152973	0.16109	0.0888917	0.1061	0.0632925
T	64	W	0.35175	0.110465	0.331096	0.14349	0.694333	0.785994	0.0662785	0.0252468	0.175873	0.0931302	0.223628	0.100511
T	64	Y	0.542604	0.141662	0.606725	0.199269	0.698908	0.785994	0.0161976	0.0091898	0.111485	0.0739865	0.0731327	0.0521977
H	65	A	0.153214	0.0757963	0.11948	0.100926	0.646408	0.78581	0.0155623	0.00893051	0.137743	0.0825316	0.0509539	0.042056
H	65	C	0.202018	0.0859164	0.260474	0.134709	0.465586	0.765105	0.0489067	0.0202344	0.148279	0.0849857	0.181604	0.0874787
H	65	D	0.117108	0.0654688	0.129749	0.10609	0.457483	0.765105	0.0208178	0.0109528	0.141811	0.0839299	0.0691349	0.0504989
H	65	E	0.455574	0.126569	0.338843	0.14502	0.88491	0.818643	0.0415021	0.0178535	0.12739	0.0792414	0.187288	0.0887594
H	65	F	0.164533	0.078306	0.144428	0.111912	0.582004	0.778563	0.0387682	0.017083	0.152799	0.0861507	0.142875	0.0752419
H	65	G	0.157242	0.0764652	0.11001	0.0955876	0.683487	0.785994	0.0166935	0.00936083	0.177411	0.0935555	0.0430264	0.0371702
H	65	I	0.149067	0.0751855	0.185134	0.126583	0.449244	0.765105	0.0139925	0.00826015	0.10877	0.0732836	0.0611033	0.0473304
H	65	K	0.26915	0.098064	0.3109	0.141503	0.542206	0.771849	0.026744	0.013263	0.191745	0.0969632	0.0661801	0.0492278
H	65	L	0.280333	0.100044	0.264175	0.134884	0.668628	0.785994	0.00838418	0.00563881	0.0651838	0.0564526	0.0634246	0.0478829
H	65	M	0.0950149	0.0561127	0.126523	0.104852	0.373866	0.717325	0.0180102	0.00984918	0.135999	0.0819693	0.0633142	0.0478829
H	65	N	0.0928388	0.0550978	0.132757	0.10743	0.356593	0.698576	0.011772	0.00726492	0.0980304	0.0710148	0.0563083	0.0455014
H	65	P	0.339976	0.109254	0.328504	0.143286	0.66593	0.785994	0.0484763	0.0201128	0.24308	0.111341	0.0998405	0.061452
H	65	Q	0.118399	0.0658227	0.18788	0.126874	0.346457	0.69279	0.0061417	0.00448565	0.0460203	0.046459	0.0694649	0.0506714
H	65	R	0.162652	0.0778554	0.164866	0.120382	0.522547	0.77067	0.0158559	0.00904028	0.082055	0.0647829	0.106435	0.0633441
H	65	S	0.148571	0.0750627	0.156976	0.116646	0.511072	0.770076	1.73426e-33	2.52077e-33	9.17805e-37	1.75406e-35	0.133493	0.0723483
H	65	T	0.155584	0.0762863	0.124216	0.103642	0.600521	0.778563	0.00707305	0.00495302	0.0644747	0.0560973	0.0492034	0.0409872
H	65	V	0.152456	0.0757963	0.202184	0.128452	0.425934	0.752633	0.0181043	0.00988841	0.0741806	0.0609087	0.136896	0.0733094
H	65	W	0.141309	0.073215	0.193081	0.12735	0.403566	0.731915	0.0245313	0.0124165	0.0876765	0.0668843	0.15937	0.0804742
H	65	Y	0.311904	0.105168	0.30909	0.141503	0.643276	0.784206	0.0329658	0.0152973	0.113503	0.0746878	0.182992	0.0876472
Q	66	A	0.380349	0.11463	0.217099	0.131004	1	0.838913	0.018726	0.0101087	0.0902739	0.0683388	0.115706	0.0667279
Q	66	C	0.142007	0.0733571	0.23782	0.132932	0.351473	0.69636	0.0840855	0.0305173	0.160983	0.0888917	0.327965	0.133491
Q	66	D	0.21921	0.0892899	0.194707	0.127729	0.624296	0.780024	0.0173435	0.00964786	0.0908179	0.0684095	0.0982648	0.0608988
Q	66	E	0.194846	0.0844354	0.156668	0.116646	0.635017	0.781747	0.0257718	0.0129406	0.102022	0.0718472	0.146094	0.0766381
Q	66	F	0.274856	0.0992482	0.318542	0.141961	0.549687	0.775529	0.0934115	0.0332867	0.184306	0.0952841	0.321205	0.131466
Q	66	G	0.471334	0.12974	0.580747	0.194858	0.627939	0.780024	0.0416167	0.0178535	0.216891	0.103194	0.0991219	0.0611847
Q	66	H	0.186472	0.0829609	0.216758	0.131004	0.493896	0.765105	0.031793	0.014945	0.103212	0.0720069	0.177749	0.086362
Q	66	I	0.257899	0.0959533	0.270043	0.135994	0.590851	0.778563	0.201535	0.0650015	0.461295	0.182879	0.282584	0.118614
Q	66	K	0.387611	0.11533	0.314328	0.141841	0.7717	0.793209	0.0311338	0.0147902	0.0949959	0.0702762	0.192316	0.0905067
Q	66	L	0.505353	0.134581	0.390939	0.155003	0.88563	0.818643	0.0120157	0.00737407	0.0613584	0.054574	0.105793	0.0632925
Q	66	M	0.254241	0.0951912	0.237998	0.132932	0.628961	0.780024	0.140299	0.0469647	0.418694	0.169005	0.199602	0.0929321
Q	66	N	0.569385	0.145903	0.648522	0.208482	0.714358	0.785994	0.180318	0.0586723	0.188887	0.0964026	0.762576	0.265228
Q	66	P	0.302506	0.103012	0.27943	0.13785	0.666831	0.785994	0.0412086	0.0177647	0.273855	0.121358	0.0723478	0.0518632
Q	66	R	0.429049	0.122318	0.343748	0.146105	0.806365	0.799975	0.0773629	0.0284541	0.17615	0.0931302	0.289711	0.120854
Q	66	S	0.535455	0.140957	0.583387	0.195471	0.721451	0.786663	0.475115	0.14185	0.613695	0.231615	0.63321	0.228326
Q	66	T	0.311344	0.105143	0.193724	0.1276	0.861098	0.808315	0.0785372	0.0287753	0.297149	0.128363	0.148023	0.0770513
Q	66	V	0.324736	0.107117	0.262336	0.134783	0.733404	0.790181	0.0329924	0.0152973	0.108468	0.0732693	0.167117	0.0825933
Q	66	W	0.316216	0.105745	0.375475	0.151793	0.57263	0.778563	0.233108	0.0743507	0.364213	0.150193	0.444069	0.169644
Q	66	Y	0.248057	0.0944401	0.250497	0.133243	0.586442	0.778563	0.144889	0.0483679	0.316001	0.134545	0.291841	0.121367
A	67	C	0.15689	0.0764652	0.192768	0.12735	0.45057	0.765105	0.0592213	0.0232398	0.184185	0.0952841	0.186567	0.0887296
A	67	D	0.238099	0.0924378	0.303274	0.141286	0.492752	0.765105	0.0154483	0.00890092	0.109656	0.0735944	0.0678873	0.0501234
A	67	E	0.249104	0.0945091	0.550568	0.188007	0.32086	0.66792	0.047428	0.0198081	0.170747	0.0917939	0.15209	0.0783771
A	67	F	0.567175	0.14554	0.411	0.158363	0.974545	0.838913	4.3332e-13	4.3516e-13	0.215985	0.103106	3.36359e-14	4.32298e-14
A	67	G	0.239019	0.092617	0.156581	0.116646	0.765031	0.793209	0.0490621	0.0202797	0.208078	0.100984	0.127494	0.0705134
A	67	H	0.222189	0.0892899	0.2952	0.139347	0.466081	0.765105	0.307916	0.0956808	0.476512	0.187171	0.467592	0.177001
A	67	I	0.430398	0.122318	0.639428	0.206766	0.525382	0.77067	0.172191	0.0562764	0.408798	0.1655	0.274168	0.115983
A	67	K	0.210425	0.087899	0.274524	0.137168	0.473946	0.765105	0.0590182	0.0232013	0.147793	0.0849857	0.26689	0.113438
A	67	L	0.323607	0.107044	0.372843	0.151374	0.580651	0.778563	0.0367611	0.0164076	0.153537	0.0863036	0.132547	0.0720524
A	67	M	0.539101	0.141105	0.348883	0.147353	0.988249	0.838913	0.0686183	0.0258045	0.21485	0.10283	0.186408	0.0887296
A	67	N	2.56863e-14	2.1823e-14	0.18596	0.126777	1.04772e-15	3.64041e-15	0.0239676	0.012187	0.108237	0.0732693	0.113457	0.0657826
A	67	P	0.436031	0.123103	0.351775	0.148314	0.838153	0.803292	0.0402389	0.0174831	0.298283	0.128652	0.0660728	0.0492278
A	67	Q	0.225528	0.0896664	0.251604	0.133243	0.540999	0.771849	0.0439294	0.0187122	0.243748	0.111555	0.0899726	0.0582336
A	67	R	0.249322	0.0945091	0.209934	0.130768	0.661073	0.785994	0.0234041	0.0119555	0.130784	0.0801045	0.0895278	0.058085
A	67	S	0.353489	0.110726	0.386871	0.154583	0.612966	0.778563	0.0231551	0.0118557	0.112737	0.0744729	0.107251	0.0633547
A	67	T	0.119538	0.0658227	0.24641	0.133116	0.290712	0.619944	0.0999789	0.0352574	0.175817	0.0931302	0.349763	0.140431
A	67	V	0.491677	0.132383	0.230681	0.132104	0.833422	0.803292	0.067881	0.0256331	0.2847	0.124735	0.127806	0.0705134
A	67	W	0.543162	0.141662	0.397239	0.155986	0.947548	0.833337	0.210349	0.0676466	0.342935	0.143772	0.424903	0.163728
A	67	Y	0.526571	0.139018	0.586771	0.195923	0.701362	0.785994	0.0971299	0.0343349	0.340126	0.143027	0.162881	0.0812662
S	68	A	0.688644	0.16744	0.374811	0.151652	0.756808	0.793209	0.102918	0.036092	0.286427	0.125294	0.216472	0.0984418
S	68	C	0.363241	0.112245	0.421673	0.160908	0.601966	0.778563	0.0637681	0.0245018	0.267977	0.119391	0.128403	0.070641
S	68	D	0.280916	0.100063	0.232522	0.132592	0.706669	0.785994	0.0388751	0.017083	0.0832082	0.0653212	0.314394	0.129154
S	68	E	0.357268	0.111627	0.522795	0.181877	0.497074	0.765105	0.0245955	0.0124347	0.100856	0.0714824	0.127483	0.0705134
S	68	F	0.50792	0.135166	0.473755	0.171766	0.785974	0.793451	0.0774591	0.0284541	0.197192	0.0988158	0.249744	0.10837
S	68	G	0.318197	0.105924	0.2752	0.137168	0.714163	0.785994	0.0317087	0.0149212	0.183932	0.0952841	0.0864283	0.0570337
S	68	H	0.259879	0.0961228	0.367837	0.150859	0.475886	0.765105	0.0501335	0.0206453	0.181441	0.0946008	0.153014	0.0784555
S	68	I	0.344799	0.110172	0.313213	0.141837	0.704713	0.785994	0.188573	0.061178	0.344828	0.144456	0.372595	0.146807
S	68	K	0.271738	0.0983946	0.213688	0.131004	0.718556	0.785994	9.58799e-11	9.33177e-11	0.123372	0.0779755	4.19831e-11	4.83204e-11
S	68	L	0.392962	0.115955	0.461466	0.169869	0.603214	0.778563	0.0886023	0.0318297	0.446579	0.178192	0.105124	0.0632925
S	68	M	0.378619	0.114296	0.422083	0.160908	0.629265	0.780024	0.0706721	0.0263525	0.214296	0.102811	0.191246	0.0900819
S	68	N	0.167178	0.0788872	0.137809	0.109494	0.6048	0.778563	0.074047	0.0274488	0.166111	0.0903476	0.285886	0.119535
S	68	P	0.160741	0.0772862	0.12978	0.10609	0.629921	0.780024	0.0887578	0.0318508	0.228122	0.106801	0.235652	0.103925
S	68	Q	0.563847	0.145093	0.450369	0.167643	0.913369	0.826789	0.0292382	0.014152	0.108405	0.0732693	0.150229	0.0776008
S	68	R	0.350958	0.110465	0.471909	0.171608	0.523401	0.77067	0.0362831	0.01626	0.113758	0.0746878	0.182968	0.0876472
S	68	T	6.20213e-15	5.3437e-15	0.318446	0.141961	1.3503e-16	4.77491e-16	0.0267	0.013256	0.105783	0.0724999	0.14709	0.0768622
S	68	V	0.551361	0.142985	0.579202	0.194611	0.752061	0.793209	0.0869019	0.0312964	0.162601	0.0891961	0.356472	0.142324
S	68	W	0.658151	0.161528	0.470041	0.171365	0.963643	0.836747	0.128521	0.0435168	0.214626	0.102811	0.42468	0.163728
S	68	Y	0.434362	0.122821	0.303217	0.141286	0.888442	0.818643	0.153981	0.0508897	0.23432	0.108767	0.48461	0.182166
L	69	A	0.285748	0.101156	0.27979	0.137886	0.641	0.784206	0.0195551	0.010461	0.103288	0.0720069	0.0971599	0.0606113
L	69	C	0.606881	0.152608	0.288662	0.138614	0.705383	0.785994	0.0287585	0.0140104	0.0859626	0.0668563	0.198778	0.0927392
L	69	D	0.0958673	0.0564378	0.113321	0.0972587	0.407749	0.735839	0.00877315	0.00583623	0.0610962	0.054574	0.0713232	0.0515498
L	69	E	0.15359	0.0757963	0.202662	0.128458	0.426281	0.752633	0.0211264	0.0110736	0.114613	0.0748201	0.0940102	0.0599084
L	69	F	0.333828	0.108273	0.336574	0.144563	0.651751	0.785994	0.018163	0.00989597	0.0971712	0.0710148	0.094962	0.0601814
L	69	G	0.135053	0.0713612	0.16413	0.120382	0.44357	0.762462	0.00955142	0.00623407	0.0765993	0.0619639	0.0628603	0.0478585
L	69	H	0.295569	0.101625	0.243476	0.133116	0.724812	0.786842	0.0604079	0.0236424	0.12436	0.0780573	0.303587	0.125287
L	69	I	0.328085	0.107192	0.359303	0.149	0.612923	0.778563	0.0227917	0.0117332	0.141145	0.0838447	0.0803783	0.0548989
L	69	K	0.218234	0.0892873	0.239365	0.132932	0.541523	0.771849	0.0549488	0.0220202	0.145916	0.084862	0.22814	0.102029
L	69	M	0.169661	0.079141	0.165511	0.120382	0.540685	0.771849	0.0966598	0.0342234	0.356505	0.147624	0.152482	0.0783896
L	69	N	0.382589	0.114894	0.252156	0.13327	0.929249	0.828326	0.00502143	0.00379284	0.033178	0.0361264	0.0838259	0.056001
L	69	P	0.389419	0.115462	0.319389	0.142127	0.785634	0.793451	0.0359545	0.0161565	0.185671	0.0953224	0.0986542	0.06107
L	69	Q	0.329317	0.107285	0.373173	0.151374	0.584727	0.778563	0.0341491	0.0156854	0.12739	0.0792414	0.140368	0.0744304
L	69	R	0.475496	0.130034	0.242064	0.133116	0.854243	0.806176	0.0648632	0.0248147	0.16167	0.0888917	0.248205	0.107961
L	69	S	0.24846	0.0944401	0.373829	0.151417	0.442728	0.762462	0.106269	0.0370031	0.270892	0.120496	0.23805	0.104726
L	69	T	0.163491	0.0780527	0.465091	0.170552	0.257811	0.567099	0.0175801	0.00972225	0.114006	0.0746878	0.0766173	0.0533647
L	69	V	0.185026	0.0826551	0.265184	0.134884	0.423508	0.75261	0.0722138	0.0268594	0.213799	0.102783	0.201337	0.0935292
L	69	W	0.222386	0.0892899	0.244857	0.133116	0.53035	0.77067	0.0675236	0.0255542	0.112263	0.0742483	0.362213	0.143871
L	69	Y	0.157016	0.0764652	0.220608	0.131004	0.403297	0.731915	0.0962517	0.0341337	0.236154	0.109147	0.256792	0.11045
S	70	A	0.159562	0.0768786	0.323671	0.143106	0.306609	0.64641	0.0184599	0.0100207	0.141349	0.0838762	0.0615781	0.0474174
S	70	C	0.400835	0.117515	0.318723	0.141961	0.811309	0.800302	0.0138733	0.0082174	0.117601	0.0759654	0.0549616	0.0446997
S	70	D	0.261653	0.0966814	0.321776	0.142793	0.52229	0.77067	0.0196814	0.0104809	0.0810323	0.0640667	0.129717	0.0711191
S	70	E	0.529578	0.139711	0.335536	0.144391	0.9872	0.838913	0.0628418	0.0242302	0.196978	0.0987982	0.181668	0.0874787
S	70	F	0.430057	0.122318	0.646175	0.208072	0.524437	0.77067	0.0563348	0.0223426	0.134877	0.0816081	0.253525	0.109833
S	70	G	0.195404	0.0844727	0.371252	0.151374	0.359033	0.699432	0.0378311	0.0167835	0.200109	0.0998263	0.0968288	0.0605651
S	70	H	1.42927e-05	1.09034e-05	0.327585	0.143286	2.26853e-06	6.8884e-06	0.0185149	0.0100382	0.0724736	0.06012	0.140814	0.0745205
S	70	I	0.353431	0.110726	0.29629	0.139588	0.773065	0.793209	0.0439572	0.0187122	0.207065	0.100669	0.106607	0.0633547
S	70	K	0.350371	0.110465	0.202222	0.128452	0.949629	0.833337	0.0506044	0.0207233	0.18275	0.0949262	0.148594	0.0770513
S	70	L	0.184089	0.0824601	0.238082	0.132932	0.454597	0.765105	5.99802e-53	1.48895e-52	8.92953e-55	4.1242e-53	0.0946863	0.0601308
S	70	M	0.537507	0.14099	0.346645	0.146923	1	0.838913	0.0937535	0.0333705	0.20984	0.10175	0.295862	0.1227
S	70	N	2.57578e-17	2.26184e-17	0.251168	0.133243	4.98127e-19	1.83583e-18	0.0295829	0.014286	0.105761	0.0724999	0.158585	0.0802279
S	70	P	0.118558	0.0658227	0.219938	0.131004	0.313498	0.658178	0.0141373	0.00831798	0.0718139	0.0599423	0.103323	0.0626666
S	70	Q	0.15695	0.0764652	0.276484	0.137524	0.355343	0.698471	0.017716	0.00976659	0.160178	0.0887758	0.0484456	0.040481
S	70	R	9.16363e-30	8.99599e-30	0.338527	0.14502	1.46167e-36	7.94412e-36	0.0616951	0.0239342	0.189071	0.0964026	0.188252	0.0890601
S	70	T	0.167909	0.0789271	0.261709	0.134783	0.388924	0.727597	0.0181392	0.00989524	0.101608	0.071738	0.0896851	0.0581172
S	70	V	0.242294	0.0933922	0.30965	0.141503	0.493203	0.765105	0.0314805	0.0148772	0.189274	0.096417	0.0825399	0.0552965
S	70	W	0.573306	0.146593	0.425566	0.161595	0.928699	0.828326	0.0388575	0.017083	0.155469	0.0870367	0.136235	0.0732939
S	70	Y	0.115063	0.0650206	0.13399	0.10781	0.432974	0.755608	1.46778e-32	2.05894e-32	4.87389e-34	8.18568e-33	0.162239	0.0811636
K	71	A	0.12411	0.0677718	0.13778	0.109494	0.454977	0.765105	0.00794886	0.00542867	0.0669394	0.0575194	0.0546745	0.0446491
K	71	C	0.246223	0.0941138	0.196816	0.127884	0.695327	0.785994	0.0163685	0.00923721	0.100519	0.0714824	0.0769211	0.0535073
K	71	D	0.47736	0.130252	0.575407	0.193606	0.653223	0.785994	0.219801	0.0704813	0.39548	0.160931	0.371963	0.146772
K	71	E	0.297437	0.102075	0.226638	0.131632	0.757503	0.793209	0.0456051	0.0192101	0.159656	0.0886638	0.153773	0.0784555
K	71	F	0.335856	0.108742	0.29873	0.140326	0.708104	0.785994	0.0312081	0.014796	0.0752987	0.0615278	0.278052	0.11706
K	71	G	0.189686	0.0834711	0.175796	0.123868	0.580529	0.778563	0.0153559	0.00886965	0.108536	0.0732693	0.0680295	0.0501234
K	71	H	0.461135	0.127728	0.215619	0.131004	0.830228	0.803292	0.112479	0.0387274	0.251956	0.114431	0.278231	0.11706
K	71	I	0.450984	0.12598	0.354024	0.148448	0.851685	0.806163	0.136131	0.0456736	0.332803	0.14016	0.264067	0.112771
K	71	L	0.188547	0.0831824	0.244797	0.133116	0.459705	0.765105	0.0608851	0.023763	0.155047	0.0869761	0.255745	0.110175
K	71	M	0.250727	0.0948267	0.330253	0.143286	0.491765	0.765105	0.0173708	0.00964786	0.0798283	0.063477	0.117722	0.0673156
K	71	N	0.196422	0.0844727	0.127312	0.105273	0.764232	0.793209	0.0108407	0.0068139	0.0527475	0.0505807	0.107456	0.0633923
K	71	P	0.08662	0.0520824	0.17309	0.123062	0.270752	0.589071	0.0832313	0.0302943	0.206072	0.10048	0.246417	0.107443
K	71	Q	0.32231	0.106807	0.256598	0.134008	0.745016	0.793209	0.046654	0.0195244	0.198867	0.0994756	0.120202	0.0681561
K	71	R	0.229374	0.0908014	0.237701	0.132932	0.565495	0.778563	0.0433628	0.0185127	0.177626	0.09358	0.134002	0.0724984
K	71	S	0.271675	0.0983946	0.23858	0.132932	0.66636	0.785994	0.0177038	0.00976659	0.102287	0.0719241	0.0892344	0.0579643
K	71	T	0.141361	0.073215	0.219201	0.131004	0.373701	0.717325	0.0135302	0.00805736	0.162424	0.0891961	0.0379377	0.0340176
K	71	V	0.138749	0.0724775	0.144983	0.111912	0.489339	0.765105	0.0645464	0.0247149	0.207268	0.100679	0.172032	0.0842921
K	71	W	0.481691	0.130684	0.46209	0.169969	0.755457	0.793209	0.111751	0.0386078	0.307464	0.131757	0.220179	0.0995284
K	71	Y	0.339832	0.109254	0.358841	0.149	0.638548	0.783295	0.07836	0.0287342	0.194123	0.0978084	0.247118	0.107662
Q	72	A	0.287651	0.101156	0.29958	0.140451	0.605842	0.778563	0.0528651	0.0213718	0.183121	0.0950298	0.161976	0.0811636
Q	72	C	5.04284e-30	4.96389e-30	0.348541	0.147337	3.8453e-32	1.83313e-31	0.173544	0.0566766	0.465116	0.184262	0.218802	0.0991672
Q	72	D	0.408818	0.118621	0.394485	0.155433	0.71856	0.785994	0.0601804	0.0235743	0.213179	0.10274	0.160643	0.0808902
Q	72	E	0.199782	0.0852188	0.199638	0.128164	0.564027	0.778563	0.0154503	0.00890092	0.14053	0.0835694	0.0497111	0.0410931
Q	72	F	0.730856	0.175951	0.97428	0.286807	0.704701	0.785994	0.1479	0.0491152	0.318754	0.135389	0.295955	0.1227
Q	72	G	0.366805	0.11276	0.28142	0.137999	0.800187	0.799094	0.113259	0.0389459	0.271333	0.120595	0.255735	0.110175
Q	72	H	0.538708	0.141103	0.403051	0.156869	0.934659	0.831014	0.0533387	0.0215436	0.171089	0.0917939	0.185199	0.0883771
Q	72	I	0.234821	0.0917247	0.273384	0.13683	0.528269	0.77067	0.111908	0.0386316	0.250848	0.114332	0.277963	0.11706
Q	72	K	0.177181	0.0810157	0.212386	0.131004	0.472816	0.765105	0.021719	0.0113038	0.0705741	0.0592644	0.17737	0.0862553
Q	72	L	0.19432	0.0844073	0.197593	0.127884	0.56681	0.778563	0.035612	0.0160571	0.128587	0.0796132	0.154582	0.0787936
Q	72	M	0.293118	0.101302	0.386372	0.154512	0.516152	0.77067	0.04236	0.0181196	0.144577	0.0844355	0.162197	0.0811636
Q	72	N	0.278324	0.0996241	0.191173	0.127221	0.772728	0.793209	0.0448954	0.0190018	0.161567	0.0888917	0.152313	0.0783771
Q	72	P	0.205537	0.0869084	0.250309	0.133243	0.494669	0.765105	0.153153	0.0506537	0.20129	0.0999648	0.57356	0.210044
Q	72	R	0.21208	0.0880722	0.314972	0.141961	0.431173	0.754709	0.280369	0.0879248	0.647488	0.2402	0.284736	0.119147
Q	72	S	0.146837	0.0746758	0.13045	0.106277	0.559046	0.778009	0.0722848	0.0268632	0.129621	0.0797338	0.344037	0.138486
Q	72	T	0.14108	0.073215	0.168253	0.121456	0.454958	0.765105	0.0315649	0.0148972	0.0962991	0.0708527	0.202167	0.0935836
Q	72	V	0.221997	0.0892899	0.359573	0.149	0.41174	0.740173	0.0888054	0.0318508	0.158971	0.0883722	0.391167	0.153118
Q	72	W	0.383854	0.114929	0.407967	0.15784	0.642294	0.784206	0.102019	0.0358053	0.251253	0.114423	0.254143	0.109924
Q	72	Y	0.73375	0.1763	0.553833	0.188829	0.952947	0.833337	0.146763	0.0488694	0.316071	0.134545	0.299333	0.123815
P	73	A	0.289909	0.10121	0.247773	0.133116	0.69052	0.785994	0.0128486	0.00770335	0.103997	0.0720484	0.0594153	0.046889
P	73	C	0.227565	0.0903784	0.288914	0.138614	0.482485	0.765105	0.0154817	0.0089074	0.0952261	0.0702762	0.0819135	0.0550642
P	73	D	0.666835	0.16333	0.545624	0.187115	0.956359	0.833991	2.04748e-37	3.39494e-37	0.094821	0.0702762	1.90074e-38	3.10913e-37
P	73	E	0.1572	0.0764652	0.230261	0.132104	0.404602	0.732052	0.0080898	0.00548255	0.0584036	0.0535029	0.0687636	0.0503808
P	73	F	0.371899	0.113355	0.413059	0.158598	0.609404	0.778563	0.109767	0.038131	0.308333	0.13196	0.210161	0.0962725
P	73	G	0.144529	0.0740183	0.265905	0.13491	0.333941	0.682108	0.0237632	0.012097	0.202755	0.0999648	0.0553953	0.0449548
P	73	H	0.404284	0.117772	0.771692	0.239406	0.398593	0.731715	0.0356567	0.0160607	0.133268	0.0810525	0.148841	0.0771051
P	73	I	0.286907	0.101156	0.47063	0.171408	0.414278	0.741871	0.0208216	0.0109528	0.105435	0.0724999	0.101503	0.0620506
P	73	K	0.2792	0.0998135	0.235015	0.132932	0.709975	0.785994	0.0322142	0.0150629	0.13958	0.0833622	0.123456	0.0692012
P	73	L	0.146578	0.0746501	0.158815	0.117823	0.48716	0.765105	0.00696733	0.00491795	0.0379514	0.0402178	0.0927857	0.0593706
P	73	M	0.329181	0.107285	0.281452	0.137999	0.728773	0.789102	0.166062	0.0544342	0.250193	0.114128	0.466782	0.176819
P	73	N	0.269676	0.098064	0.155424	0.116383	0.824615	0.803292	0.0217153	0.0113038	0.102829	0.0720039	0.108971	0.0639204
P	73	Q	0.167626	0.0788956	0.192989	0.12735	0.481019	0.765105	0.00752976	0.00519556	0.0524717	0.0505807	0.0717634	0.0516879
P	73	R	0.116321	0.0654365	0.198671	0.127884	0.331816	0.681424	0.0177708	0.00976659	0.131592	0.0804107	0.0652777	0.0488719
P	73	S	0.292969	0.101302	0.342416	0.145989	0.554135	0.776339	0.0162031	0.0091898	0.0794809	0.0633827	0.105215	0.0632925
P	73	T	0.197402	0.0846139	0.221735	0.131037	0.504982	0.765857	0.0333553	0.0154009	0.161594	0.0888917	0.102026	0.0622293
P	73	V	0.12606	0.0682844	0.22921	0.132011	0.318749	0.666504	0.0115668	0.00717839	0.0766955	0.0619639	0.0785805	0.0541261
P	73	W	0.349208	0.110465	0.256306	0.134008	0.835521	0.803292	0.0651703	0.024879	0.143787	0.0843109	0.299047	0.123792
P	73	Y	0.547278	0.142229	0.558184	0.189591	0.764851	0.793209	0.0509272	0.0208362	0.14592	0.084862	0.221085	0.0997076
T	74	A	0.159479	0.0768786	0.254905	0.134008	0.369855	0.712168	0.0065079	0.00466067	0.0876011	0.0668843	0.032385	0.0297695
T	74	C	0.204212	0.0865482	0.106956	0.0934623	0.798799	0.799094	0.0039762	0.00307698	0.0486125	0.0481979	0.0359876	0.0324849
T	74	D	0.119333	0.0658227	0.160986	0.118735	0.394272	0.731715	0.0460752	0.019333	0.148916	0.0852624	0.167961	0.0827985
T	74	E	0.238288	0.0924378	0.216839	0.131004	0.62087	0.780024	0.010221	0.00656442	0.0651039	0.0564526	0.0780906	0.0540271
T	74	F	0.232305	0.0915546	0.322574	0.142896	0.45532	0.765105	0.0145924	0.00851772	0.0864648	0.0668563	0.0870191	0.0572835
T	74	G	0.176017	0.0809714	0.196507	0.127884	0.493207	0.765105	0.010097	0.00650368	0.0974496	0.0710148	0.0488676	0.0407704
T	74	H	0.375959	0.114152	0.30988	0.141503	0.779962	0.793451	0.029257	0.014152	0.123546	0.0779755	0.127947	0.0705134
T	74	I	0.324208	0.107049	0.277312	0.137651	0.698164	0.785994	0.0188403	0.0101524	0.0942533	0.0702128	0.104199	0.0630564
T	74	K	0.252554	0.0949244	0.13377	0.10781	0.971069	0.838913	0.0687811	0.0258144	0.399953	0.162394	0.0846745	0.0563587
T	74	L	0.238304	0.0924378	0.345835	0.146838	0.44379	0.762462	0.0824175	0.0300724	0.275793	0.121893	0.167108	0.0825933
T	74	M	0.153535	0.0757963	0.0899258	0.0823154	0.778949	0.793451	0.0854351	0.0309107	0.199441	0.0996337	0.256753	0.11045
T	74	N	0.390725	0.115706	0.327603	0.143286	0.773523	0.793209	0.00825055	0.00557068	0.0933966	0.0697621	0.0394962	0.0351212
T	74	P	0.193795	0.0842791	0.198479	0.127884	0.551471	0.775529	0.00724377	0.00505327	0.0401838	0.0421006	0.101392	0.0620506
T	74	Q	0.186823	0.0829609	0.289083	0.138614	0.395319	0.731715	0.0636571	0.0244804	0.156107	0.0872176	0.255642	0.110175
T	74	R	0.475905	0.130048	0.423257	0.1611	0.802998	0.799094	0.0292733	0.014152	0.0883107	0.0669558	0.191201	0.0900819
T	74	S	0.236948	0.092303	0.186825	0.126777	0.70712	0.785994	0.00872955	0.00583557	0.0447822	0.0457379	0.109518	0.0641183
T	74	V	0.20369	0.0864269	0.389176	0.15491	0.338041	0.685301	0.0117217	0.00724396	0.0659726	0.0567827	0.0963135	0.0604461
T	74	W	0.299599	0.102433	0.381095	0.153165	0.537553	0.771249	0.0578818	0.0228358	0.198379	0.0993209	0.167823	0.0827985
T	74	Y	0.328866	0.107285	0.371599	0.151374	0.59774	0.778563	0.0771588	0.0284354	0.305188	0.13112	0.137237	0.073419
S	75	A	0.302648	0.103012	0.286552	0.138386	0.654678	0.785994	0.0557399	0.0222098	0.18605	0.0953224	0.169919	0.0835349
S	75	C	0.143996	0.0738484	0.165746	0.120382	0.469127	0.765105	0.00483838	0.00366711	0.0527497	0.0505807	0.0404409	0.0356114
S	75	D	0.4523	0.126044	0.281174	0.137999	0.989838	0.838913	0.0619473	0.0239899	0.15122	0.0856802	0.23014	0.102582
S	75	E	0.274699	0.0992482	0.293854	0.139347	0.58481	0.778563	0.00606069	0.00444855	0.0475001	0.0473492	0.0633961	0.0478829
S	75	F	0.223271	0.0894005	0.285498	0.138333	0.485573	0.765105	0.0119511	0.00734463	0.0764136	0.0619639	0.0780675	0.0540271
S	75	G	0.118435	0.0658227	0.156986	0.116646	0.401062	0.731715	0.022964	0.0117989	0.141967	0.0839299	0.0814883	0.0549837
S	75	H	0.165669	0.0786645	0.13896	0.109864	0.602658	0.778563	0.0124722	0.00752249	0.0982352	0.0710148	0.0602201	0.0472794
S	75	I	0.275376	0.0992482	0.31373	0.141837	0.557801	0.777575	0.0140016	0.00826015	0.0911638	0.0685177	0.0763452	0.0533647
S	75	K	0.213198	0.0883122	0.316211	0.141961	0.427861	0.752633	0.0121855	0.00742673	0.104618	0.0723878	0.0542781	0.0444599
S	75	L	0.277109	0.0993836	0.226221	0.13157	0.713345	0.785994	0.02007	0.0106567	0.1116	0.0739865	0.094337	0.0599796
S	75	M	0.153297	0.0757963	0.194982	0.127729	0.436562	0.75718	0.00696163	0.00491795	0.0428852	0.0442615	0.0928721	0.0593706
S	75	N	0.560785	0.144508	0.329797	0.143286	0.916273	0.826789	0.00753699	0.00519556	0.0463935	0.0467506	0.0866444	0.0571065
S	75	P	0.269982	0.0980763	0.337257	0.144727	0.517617	0.77067	0.0196873	0.0104809	0.0980599	0.0710148	0.108365	0.0636789
S	75	Q	0.291768	0.101269	0.17163	0.122245	0.903123	0.825082	0.0339638	0.0156166	0.149162	0.0853155	0.124311	0.0694644
S	75	R	0.303325	0.10313	0.240047	0.133076	0.759352	0.793209	0.0514914	0.0209893	0.289465	0.126324	0.0916299	0.0588826
S	75	T	0.189367	0.0834438	0.178138	0.124486	0.575192	0.778563	0.00479662	0.00364171	0.047085	0.0472755	0.0494573	0.0410089
S	75	V	0.299056	0.102343	0.317984	0.141961	0.598445	0.778563	0.00464903	0.00354381	0.0363638	0.0390534	0.0781688	0.0540271
S	75	W	7.12924e-14	6.00128e-14	0.402328	0.156869	6.55104e-16	2.28761e-15	0.0177277	0.00976659	0.0928616	0.0696441	0.0973518	0.0606113
S	75	Y	0.181695	0.08217	0.278915	0.13785	0.401603	0.731715	0.0274888	0.0135714	0.147891	0.0849857	0.0960997	0.0604164
Q	76	A	0.142036	0.0733571	0.190938	0.127221	0.413308	0.741084	0.0306336	0.0146019	0.144123	0.0843109	0.113022	0.0656713
Q	76	C	0.500305	0.133625	0.468331	0.171088	0.786401	0.793451	0.0401254	0.0174565	0.146434	0.0849641	0.153466	0.0784555
Q	76	D	0.247313	0.0943652	0.217636	0.131004	0.654274	0.785994	0.0231448	0.0118557	0.203088	0.0999648	0.0513324	0.0423038
Q	76	E	0.34952	0.110465	0.425899	0.161595	0.581521	0.778563	0.0781252	0.0286719	0.330371	0.139259	0.129088	0.0708863
Q	76	F	9.82619e-06	7.52744e-06	1.62654e-07	1.86466e-07	0.817802	0.802739	0.0156264	0.00895474	0.109814	0.0735944	0.0696422	0.0507322
Q	76	G	0.537279	0.14099	0.421833	0.160908	0.922281	0.826884	0.146609	0.0488549	0.267248	0.119161	0.361409	0.143763
Q	76	H	0.323327	0.107044	0.191196	0.127221	1	0.838913	0.0262269	0.0131095	0.122681	0.0779727	0.112638	0.0655188
Q	76	I	0.377261	0.114296	0.366398	0.15054	0.693589	0.785994	0.0396931	0.0173826	0.167143	0.0907308	0.129776	0.0711191
Q	76	K	0.523435	0.13849	0.339179	0.145035	0.984507	0.838913	0.0406872	0.0176259	0.138426	0.0828026	0.166502	0.0825933
Q	76	L	0.363185	0.112245	0.255963	0.134008	0.839722	0.803292	0.0591503	0.0232325	0.193587	0.0976275	0.173343	0.0846784
Q	76	M	0.146041	0.0745839	0.237177	0.132932	0.366974	0.70897	0.0318576	0.0149595	0.155853	0.0871636	0.106799	0.0633547
Q	76	N	0.0619106	0.0386204	0.0941929	0.085249	0.318544	0.666504	0.00995708	0.00644646	0.0704584	0.0592644	0.0680637	0.0501234
Q	76	P	0.176283	0.0809918	0.26934	0.135936	0.397839	0.731715	0.0234651	0.0119728	0.0968008	0.0709822	0.130788	0.07146
Q	76	R	0.29061	0.10121	0.290048	0.138614	0.624716	0.780024	0.23951	0.0760287	0.49788	0.194052	0.324759	0.132705
Q	76	S	0.171782	0.0797243	0.117767	0.100182	0.715196	0.785994	0.00799667	0.00544449	0.0526756	0.0505807	0.0807961	0.0549005
Q	76	T	0.228541	0.0906084	0.13862	0.109864	0.835757	0.803292	0.00212408	0.00174454	0.0409259	0.0427166	0.0217093	0.0207042
Q	76	V	0.432317	0.122622	0.371811	0.151374	0.78906	0.794629	0.155595	0.0513079	0.347771	0.145469	0.288875	0.120598
Q	76	W	0.432774	0.122656	0.591272	0.196312	0.571068	0.778563	0.288624	0.0903215	0.337323	0.141956	0.69205	0.24451
Q	76	Y	0.33256	0.108072	0.352121	0.14833	0.628009	0.780024	0.021756	0.0113098	0.0601836	0.054237	0.245444	0.107192
S	77	A	0.106298	0.0609135	0.0999143	0.0890875	0.497837	0.765105	0.00806493	0.00547409	0.057143	0.052985	0.0714332	0.0515498
S	77	C	0.482156	0.130684	0.455675	0.168252	0.764624	0.793209	0.0298786	0.0143661	0.0878795	0.0668843	0.195174	0.0916919
S	77	D	0.0948249	0.0560947	0.0725977	0.0677703	0.541599	0.771849	0.00432705	0.00332519	0.0442254	0.0453072	0.0449313	0.0384979
S	77	E	0.164184	0.0782815	0.294796	0.139347	0.334476	0.682108	0.00577257	0.00425119	0.0717183	0.0599423	0.0350381	0.0317872
S	77	F	0.247396	0.0943652	0.270302	0.135994	0.556542	0.777575	0.0253983	0.0127967	0.19114	0.0967456	0.0608021	0.047292
S	77	G	0.307753	0.104055	0.335814	0.144391	0.602282	0.778563	0.00910099	0.0059932	0.0527418	0.0505807	0.0891236	0.0579621
S	77	H	0.168526	0.0790144	0.133846	0.10781	0.612748	0.778563	0.00690384	0.00489661	0.0508636	0.0497184	0.0658996	0.049201
S	77	I	0.152022	0.0757963	0.176738	0.124229	0.468962	0.765105	0.018939	0.0101931	0.133771	0.0811162	0.0687866	0.0503808
S	77	K	0.212051	0.0880722	0.353948	0.148448	0.37903	0.723259	0.0689783	0.0258518	0.189802	0.0964946	0.212126	0.0967917
S	77	L	0.104033	0.059803	0.219867	0.131004	0.268109	0.584232	0.00992057	0.00643698	0.105486	0.0724999	0.0415028	0.0363096
S	77	M	0.33761	0.109113	0.171274	0.122245	1	0.838913	0.012263	0.00746366	0.0830997	0.0653212	0.068626	0.0503808
S	77	N	0.28617	0.101156	0.145037	0.111912	0.969968	0.838913	0.0100041	0.0064558	0.0598681	0.0540406	0.0809305	0.0549005
S	77	P	0.196238	0.0844727	0.213499	0.131004	0.521992	0.77067	0.00330697	0.00260936	0.0366774	0.0391673	0.0391896	0.0350238
S	77	Q	0.143591	0.0738114	0.146614	0.112408	0.508344	0.768726	0.0107494	0.00677164	0.0472861	0.0473492	0.130626	0.07146
S	77	R	0.335868	0.108742	0.324788	0.143244	0.674084	0.785994	0.0120591	0.00738026	0.0679183	0.0580904	0.0953026	0.0602907
S	77	T	0.347816	0.110465	0.290181	0.138614	0.746073	0.793209	0.0240054	0.0121922	0.122819	0.0779727	0.0978988	0.0608116
S	77	V	0.21052	0.087899	0.180216	0.124866	0.626711	0.780024	0.0516826	0.0210478	0.206747	0.100669	0.137874	0.0736137
S	77	W	0.290551	0.10121	0.319913	0.142228	0.57893	0.778563	0.0495573	0.0204652	0.127297	0.0792414	0.269542	0.114295
S	77	Y	0.290183	0.10121	0.41166	0.15844	0.495344	0.765105	0.08604	0.0310563	0.18482	0.0952869	0.291005	0.121113
R	78	A	0.0739034	0.0449529	0.142797	0.111254	0.27128	0.589302	0.00026022	0.000223268	0.0160632	0.0190229	0.00560682	0.00548285
R	78	C	0.125212	0.0680263	0.169414	0.121747	0.401492	0.731715	0.0276352	0.0135982	0.135364	0.0818137	0.108108	0.0636435
R	78	D	0.101244	0.0587909	0.14863	0.113773	0.364238	0.704658	0.00259257	0.00210583	0.039609	0.0416558	0.0281646	0.0263943
R	78	E	0.23963	0.0927555	0.229193	0.132011	1	0.838913	0.0145331	0.00849435	0.123808	0.0779755	0.0537136	0.0440644
R	78	F	0.630489	0.15631	0.823597	0.251937	0.667486	0.785994	0.0875286	0.0314952	0.231157	0.107569	0.225738	0.101364
R	78	G	0.218743	0.0892899	0.246053	0.133116	0.516706	0.77067	0.00728483	0.00505327	0.0771118	0.0621149	0.043174	0.0371702
R	78	H	0.0439649	0.0282437	0.0765465	0.0712882	0.256412	0.56491	0.00166586	0.00137844	0.0192298	0.0223695	0.0392663	0.0350343
R	78	I	0.0675035	0.0415432	0.0957758	0.0860346	0.354489	0.698471	0.0170768	0.00953941	0.178587	0.0936913	0.0431751	0.0371702
R	78	K	0.119476	0.0658227	0.132174	0.107318	0.457847	0.765105	0.0152673	0.00883004	0.110539	0.0738354	0.0662946	0.0492278
R	78	L	0.0895165	0.0536478	0.127469	0.105273	0.347338	0.693084	0.0144142	0.0084472	0.0634041	0.055585	0.115639	0.0667279
R	78	M	0.24332	0.0935902	0.330161	0.143286	0.481872	0.765105	0.0256152	0.0128766	0.127642	0.0793089	0.0991796	0.0611847
R	78	N	0.0703544	0.0431526	0.130118	0.106186	0.272991	0.59118	0.000603877	0.000511176	0.0197564	0.0229072	0.0120425	0.0116915
R	78	P	0.199912	0.0852188	0.247224	0.133116	0.480608	0.765105	0.0195187	0.0104542	0.147756	0.0849857	0.0606725	0.0472794
R	78	Q	0.0855791	0.0516261	0.0888958	0.0816822	0.433851	0.755608	0.00825766	0.00557068	0.103722	0.0720251	0.0333627	0.0305238
R	78	S	0.110802	0.0630994	0.125685	0.104517	0.433389	0.755608	0.0028245	0.00225689	0.0347586	0.0376257	0.0353724	0.0320367
R	78	T	0.214005	0.0884833	0.145648	0.112025	0.736778	0.792243	0.00630239	0.00457278	0.0364298	0.0390534	0.0854147	0.0567813
R	78	V	0.097412	0.0570719	0.0769555	0.0715307	0.543779	0.772245	0.0226425	0.0116884	0.145246	0.0847371	0.0732012	0.0521977
R	78	W	0.216128	0.0889223	0.200217	0.128193	0.582247	0.778563	0.0140655	0.0082868	0.108274	0.0732693	0.0606982	0.0472794
R	78	Y	0.300515	0.102611	0.259583	0.134709	0.696109	0.785994	0.0162789	0.00919835	0.0865602	0.0668563	0.0921079	0.0591194
G	79	A	0.148618	0.0750627	0.104075	0.0917777	0.705413	0.785994	0.00554916	0.00414889	0.106948	0.0730654	0.0206438	0.0197929
G	79	C	0.263148	0.0971257	0.217212	0.131004	0.692465	0.785994	0.00788211	0.00539141	0.0756007	0.0615278	0.0473822	0.0399635
G	79	D	0.11348	0.0643245	0.149951	0.114601	0.385504	0.725698	0.0107582	0.00677164	0.0723299	0.06012	0.0758154	0.0532182
G	79	E	0.198619	0.0848653	0.217199	0.131004	0.526387	0.77067	0.0196151	0.0104804	0.105874	0.0724999	0.0941141	0.0599084
G	79	F	0.211913	0.0880722	0.264157	0.134884	0.488876	0.765105	0.0811144	0.0296704	0.184627	0.0952841	0.276296	0.116701
G	79	H	0.165846	0.0786645	0.24739	0.133116	0.398009	0.731715	0.00571346	0.00422173	0.0726433	0.06012	0.033932	0.0309397
G	79	I	0.258111	0.0959533	0.482086	0.173351	0.378753	0.723259	0.0110124	0.00689963	0.0830204	0.0653212	0.0627236	0.0478281
G	79	K	0.112904	0.0641968	0.194209	0.127729	0.329546	0.678683	0.0198646	0.0105626	0.180716	0.0944892	0.0494275	0.0410089
G	79	L	0.158795	0.0768786	0.114429	0.0980352	1	0.838913	0.0122827	0.00746501	0.168635	0.0910947	0.0305757	0.0282613
G	79	M	0.241976	0.0933922	0.253347	0.133621	0.574431	0.778563	0.00571175	0.00422173	0.0573595	0.0530132	0.0447674	0.0384185
G	79	N	0.0904452	0.0539396	0.134687	0.107903	0.339936	0.687	0.0160755	0.0091419	0.211245	0.102112	0.0315628	0.0291069
G	79	P	0.17706	0.0810157	0.257029	0.13408	0.404002	0.731915	0.0225581	0.0116855	0.14343	0.0842096	0.0776139	0.0539197
G	79	Q	0.0752566	0.0457001	0.0912572	0.0833756	0.380038	0.724193	0.00913126	0.00600419	0.118285	0.0761412	0.0331475	0.0303783
G	79	R	0.242295	0.0933922	0.104461	0.0919491	0.991926	0.838913	0.0253135	0.0127685	0.0878769	0.0668843	0.153399	0.0784555
G	79	S	0.168914	0.0790155	0.261969	0.134783	0.389677	0.727597	0.00542931	0.00406616	0.0619578	0.0548548	0.0376264	0.0338355
G	79	T	0.233904	0.0917247	0.316571	0.141961	0.473271	0.765105	0.0230417	0.0118251	0.094985	0.0702762	0.124646	0.0695563
G	79	V	0.316875	0.105772	0.487444	0.173906	0.456039	0.765105	0.0148726	0.00865838	0.100865	0.0714824	0.0719165	0.0516879
G	79	W	0.349336	0.110465	0.233999	0.132722	0.835949	0.803292	0.104905	0.0366436	0.291281	0.126833	0.218518	0.0991219
G	79	Y	0.181949	0.08217	0.18531	0.126583	0.533652	0.77067	0.0397413	0.0173865	0.291318	0.126833	0.0656719	0.0490988
D	80	A	0.197747	0.0846139	0.408616	0.157899	0.327484	0.678675	2.51138e-41	4.80388e-41	9.09721e-43	2.65367e-41	0.116209	0.0668039
D	80	C	0.419033	0.120724	0.444434	0.16666	0.673414	0.785994	0.0906731	0.032468	0.206132	0.10048	0.271826	0.115083
D	80	E	0.124818	0.067913	0.178028	0.124486	0.385378	0.725698	0.029639	0.0142975	0.163053	0.0891961	0.0929392	0.0593706
D	80	F	0.464249	0.1283	0.264863	0.134884	1	0.838913	0.0304037	0.0145237	0.118057	0.0760829	0.140048	0.0743336
D	80	G	0.311544	0.105143	0.373915	0.151417	0.551522	0.775529	0.0210294	0.0110359	0.168284	0.0909935	0.0581744	0.0463844
D	80	H	0.259143	0.0959652	0.25115	0.133243	0.613417	0.778563	0.0443938	0.0188255	0.139989	0.0834544	0.184782	0.0882696
D	80	I	0.222329	0.0892899	0.263136	0.134783	0.504743	0.765857	0.0505366	0.0207233	0.16159	0.0888917	0.16274	0.0812662
D	80	K	0.251983	0.0949244	0.152999	0.115465	0.806968	0.799975	0.0363262	0.0162628	0.124161	0.0780206	0.161538	0.0810612
D	80	L	0.24964	0.0945319	0.204395	0.128813	0.697893	0.785994	0.0563473	0.0223426	0.229672	0.107058	0.13143	0.0716621
D	80	M	0.36885	0.112836	0.293054	0.139347	0.779882	0.793451	0.0348996	0.0158653	0.119089	0.0763926	0.177182	0.0862418
D	80	N	0.101309	0.0587909	0.0966928	0.0865355	0.48501	0.765105	0.0103761	0.00661597	0.0805424	0.0637704	0.0602447	0.0472794
D	80	P	0.4446	0.124944	0.328015	0.143286	0.896228	0.821958	0.0541	0.0218208	0.156395	0.0872902	0.199708	0.0929321
D	80	Q	0.179117	0.0816401	0.219678	0.131004	0.474771	0.765105	0.0522141	0.0211862	0.352057	0.146595	0.0736398	0.0522344
D	80	R	0.607222	0.152608	0.358823	0.149	0.897526	0.822068	0.0291217	0.0141406	0.0755884	0.0615278	0.212044	0.0967917
D	80	S	0.382132	0.114894	0.312527	0.141826	0.781758	0.793451	0.0310064	0.0147478	0.171467	0.0918191	0.0875061	0.0575339
D	80	T	0.15177	0.0757963	0.0826923	0.0765675	0.830621	0.803292	0.0266182	0.0132494	0.16741	0.0907869	0.0786783	0.0541261
D	80	V	0.300679	0.102611	0.222233	0.131037	0.763122	0.793209	0.0112857	0.00703353	0.0685391	0.0583513	0.0813552	0.0549837
D	80	W	0.102279	0.0591659	0.0960708	0.086139	0.501906	0.765857	0.0128318	0.00770335	0.0556275	0.0522552	0.131254	0.0716381
D	80	Y	0.536993	0.14099	0.436212	0.164293	0.875108	0.815983	0.109997	0.0381755	0.294931	0.127737	0.223299	0.100511
P	81	A	0.0951618	0.0561127	0.14039	0.11027	0.353397	0.698192	0.0029843	0.00237597	0.0389553	0.0411244	0.0339185	0.0309397
P	81	C	0.163	0.0779202	0.195571	0.127884	0.462629	0.765105	0.0248974	0.012573	0.120757	0.0771944	0.109717	0.0641655
P	81	D	0.0776549	0.0470785	0.109034	0.0949334	0.345511	0.69279	0.00280472	0.00225124	0.0252685	0.0285227	0.0609628	0.0473304
P	81	E	0.152416	0.0757963	0.170005	0.121807	0.501827	0.765857	0.00560203	0.00417103	0.0465028	0.0467757	0.062627	0.0478281
P	81	F	0.166676	0.0788537	0.123299	0.103246	0.658504	0.785994	0.0284785	0.0139047	0.147446	0.0849857	0.0978675	0.0608116
P	81	G	0.0780544	0.0472424	0.143622	0.111716	0.280203	0.603392	0.0343395	0.0157253	0.17108	0.0917939	0.102857	0.0626203
P	81	H	0.174608	0.0805257	0.190264	0.127221	0.508803	0.768726	0.0133765	0.0079766	0.0998496	0.0713144	0.0643122	0.0484176
P	81	I	0.11348	0.0643245	0.244987	0.133116	0.271902	0.589736	0.00302217	0.00239748	0.0366706	0.0391673	0.0376719	0.0338355
P	81	K	0.183596	0.0824601	0.250996	0.133243	0.44104	0.761484	0.00924848	0.00605423	0.0912361	0.0685177	0.0460219	0.0393076
P	81	L	0.26968	0.098064	0.406362	0.157534	0.467295	0.765105	0.00646162	0.00465013	0.0546764	0.0518008	0.0564581	0.0455542
P	81	M	0.328113	0.107192	0.282113	0.138042	0.704321	0.785994	0.00706927	0.00495302	0.0652676	0.0564526	0.0493109	0.0410089
P	81	N	0.0659136	0.0407703	0.0919112	0.0834978	0.329918	0.678683	0.00957223	0.00623844	0.132481	0.0807759	0.0304438	0.0282362
P	81	Q	0.291423	0.101245	0.159915	0.118275	0.924095	0.826884	0.00624835	0.00454851	0.068023	0.0580904	0.0424221	0.0368383
P	81	R	0.17722	0.0810157	0.237299	0.132932	0.436921	0.75718	0.0242906	0.0123229	0.123578	0.0779755	0.106085	0.0632925
P	81	S	0.23121	0.0913309	0.154797	0.116275	0.76104	0.793209	0.0236067	0.0120312	0.149573	0.0854623	0.0749473	0.0527792
P	81	T	0.136107	0.0715946	0.18184	0.125434	0.407741	0.735839	0.00616445	0.00449484	0.0951671	0.0702762	0.0270596	0.0254916
P	81	V	0.117601	0.0656444	0.183346	0.125932	0.356039	0.698471	0.00614005	0.00448565	0.0386583	0.0408888	0.0857562	0.0568683
P	81	W	0.536032	0.14099	0.414033	0.158845	0.910193	0.825992	0.190612	0.0617942	0.352316	0.146595	0.367833	0.145568
P	81	Y	0.143342	0.0738114	0.217351	0.131004	0.382567	0.725698	0.033254	0.0153727	0.150394	0.0856802	0.120555	0.0682758
T	82	A	0.152842	0.0757963	0.200065	0.128193	0.428295	0.752633	0.00266948	0.00216037	0.0283093	0.031633	0.0434191	0.0373207
T	82	C	0.134459	0.0711497	0.19068	0.127221	0.399843	0.731715	0.00726491	0.00505327	0.110199	0.0737629	0.0269438	0.0254293
T	82	D	0.103805	0.0597654	0.203032	0.128458	0.289053	0.618293	0.00812266	0.00549639	0.0629291	0.0552733	0.0627318	0.0478281
T	82	E	0.367064	0.11276	0.306643	0.141286	0.767279	0.793209	0.0452419	0.0190753	0.281456	0.123607	0.0790864	0.0542445
T	82	F	0.43861	0.123529	0.408136	0.15784	0.74547	0.793209	0.0563788	0.0223426	0.163189	0.0891961	0.207058	0.0952845
T	82	G	0.306965	0.103981	0.244463	0.133116	0.746241	0.793209	0.0124788	0.00752249	0.0523567	0.0505807	0.136324	0.0732939
T	82	H	0.122992	0.0674242	0.128456	0.105648	0.465686	0.765105	0.0142728	0.00837544	0.0708458	0.0594025	0.113389	0.0657826
T	82	I	0.347717	0.110465	0.49365	0.17494	0.515404	0.77067	0.00649669	0.0046602	0.11746	0.0759654	0.0225842	0.0214628
T	82	K	0.210896	0.0879555	0.220657	0.131004	0.568523	0.778563	0.0680147	0.0256331	0.178682	0.0936913	0.233953	0.103516
T	82	L	0.14835	0.0750627	0.188954	0.127065	0.443633	0.762462	0.0879909	0.0316358	0.43758	0.175359	0.108117	0.0636435
T	82	M	0.450232	0.12598	0.397219	0.155986	0.794318	0.797625	0.0429742	0.0183645	0.14186	0.0839299	0.181557	0.0874787
T	82	N	0.275163	0.0992482	0.216528	0.131004	0.707039	0.785994	0.00359192	0.00280912	0.0286555	0.0319554	0.0602766	0.0472794
T	82	P	0.0658224	0.0407703	0.106435	0.0931762	1	0.838913	0.00079296	0.00066995	0.0192088	0.0223695	0.0167797	0.0161743
T	82	Q	0.574082	0.146593	0.450545	0.167643	0.923234	0.826884	0.0268249	0.0132882	0.114569	0.0748201	0.127548	0.0705134
T	82	R	0.438891	0.123529	0.393439	0.155255	0.757695	0.793209	0.0483394	0.0200749	0.146364	0.0849641	0.190003	0.0896526
T	82	S	0.156281	0.0764652	0.104676	0.0919707	0.673489	0.785994	0.00299285	0.0023785	0.0431601	0.0443954	0.0293142	0.0272822
T	82	V	0.346042	0.11028	0.274735	0.137168	0.774387	0.793209	0.0966072	0.0342234	0.158639	0.0882759	0.420177	0.162587
T	82	W	0.378003	0.114296	0.393711	0.155255	0.657685	0.785994	0.347595	0.106883	0.472143	0.185982	0.581654	0.211858
T	82	Y	0.158483	0.0768786	0.111569	0.0960977	0.67874	0.785994	0.0089877	0.00594517	0.0726777	0.06012	0.0584917	0.0464317
G	83	A	0.298873	0.102343	0.313079	0.141837	0.605765	0.778563	0.124586	0.0423465	0.353708	0.146929	0.211962	0.0967917
G	83	C	0.132199	0.0701568	0.128206	0.105648	0.52376	0.77067	0.0226431	0.0116884	0.0755258	0.0615278	0.160334	0.0808461
G	83	D	0.221204	0.0892899	0.251561	0.133243	0.524814	0.77067	0.0120559	0.00738026	0.0724652	0.06012	0.0839472	0.0560127
G	83	E	0.292184	0.101302	0.24159	0.133116	0.719882	0.786091	0.00875262	0.00583623	0.0679722	0.0580904	0.0612456	0.047364
G	83	F	0.16896	0.0790155	0.118975	0.100802	0.696444	0.785994	0.0326532	0.0151878	0.113534	0.0746878	0.160895	0.0809416
G	83	H	0.191811	0.0837145	0.173525	0.123062	0.591059	0.778563	0.0205312	0.0108518	0.103834	0.0720251	0.102899	0.0626203
G	83	I	0.0891492	0.0535153	0.137608	0.109494	0.335486	0.683095	0.0181884	0.00989762	0.0880957	0.0668843	0.105212	0.0632925
G	83	K	0.185224	0.0826551	0.215367	0.131004	0.484947	0.765105	0.00463684	0.00354381	0.0522689	0.0505807	0.0393709	0.0350696
G	83	L	0.119501	0.0658227	0.100804	0.0895489	0.549204	0.775529	0.0121683	0.00742648	0.0865188	0.0668563	0.0720075	0.0516879
G	83	M	0.294186	0.101339	0.22468	0.131446	0.775048	0.793209	0.0365935	0.0163659	0.242187	0.111208	0.0728105	0.0521257
G	83	N	0.0995015	0.0581102	0.186663	0.126777	0.290687	0.619944	0.0224634	0.0116638	0.0932185	0.0697231	0.127375	0.0705134
G	83	P	0.171685	0.0797243	0.299399	0.140451	0.350667	0.696143	0.0830998	0.0302714	0.147832	0.0849857	0.387414	0.151855
G	83	Q	0.108809	0.0622549	0.179605	0.124866	0.329707	0.678683	0.00161575	0.00133949	0.0205677	0.0237486	0.0410171	0.0360013
G	83	R	0.263386	0.0971257	0.198471	0.127884	0.713171	0.785994	0.0162264	0.0091898	0.0750951	0.0614774	0.109061	0.0639204
G	83	S	0.340134	0.109254	0.180645	0.124968	1	0.838913	0.00928336	0.00606808	0.102894	0.0720039	0.0402716	0.0355203
G	83	T	0.281352	0.100121	0.235244	0.132932	0.701736	0.785994	0.0445711	0.0188826	0.200762	0.0998823	0.117463	0.0673108
G	83	V	0.212137	0.0880722	0.155073	0.116301	0.69909	0.785994	0.00570827	0.00422173	0.0474626	0.0473492	0.0578602	0.0462706
G	83	W	0.17255	0.0799794	0.177724	0.124486	0.520271	0.77067	0.0561029	0.0223334	0.153273	0.0862701	0.22003	0.0995284
G	83	Y	0.531858	0.140212	0.471871	0.171608	0.835175	0.803292	0.0332595	0.0153727	0.105957	0.0724999	0.196442	0.0921272
P	84	A	0.294785	0.10145	0.376612	0.151929	0.520745	0.77067	0.0326336	0.0151878	0.216926	0.103194	0.0734831	0.0522057
P	84	C	0.304887	0.103373	0.627485	0.203999	0.381565	0.725428	0.0156877	0.00896751	0.0761755	0.0619047	0.106114	0.0632925
P	84	D	0.348017	0.110465	0.306493	0.141286	0.714906	0.785994	0.064033	0.0245609	0.280578	0.123319	0.123387	0.0692012
P	84	E	0.122999	0.0674242	0.0978047	0.0873682	0.571193	0.778563	0.0568231	0.0224985	0.220645	0.104253	0.134039	0.0724984
P	84	F	0.386731	0.11533	0.358375	0.149	0.719565	0.786091	0.0382561	0.016938	0.150872	0.0856802	0.135689	0.0730981
P	84	G	0.131709	0.0701001	0.261133	0.13476	0.296726	0.630842	0.0124174	0.00751626	0.102823	0.0720039	0.0573388	0.0459327
P	84	H	0.181394	0.08217	0.183866	0.126109	0.531638	0.77067	0.0113535	0.00705593	0.0459071	0.046459	0.130795	0.07146
P	84	I	0.478651	0.13041	0.528134	0.183205	0.677248	0.785994	0.0938594	0.0333705	0.350291	0.146086	0.15367	0.0784555
P	84	K	0.224595	0.0895691	0.0917108	0.0834733	1	0.838913	0.00192798	0.00158939	0.0212037	0.0243308	0.0482725	0.040481
P	84	L	0.313759	0.105436	0.399817	0.156509	0.534045	0.77067	0.0359791	0.0161565	0.175322	0.0931302	0.106998	0.0633547
P	84	M	0.411053	0.119081	0.391778	0.155003	0.724994	0.786842	0.0173801	0.00964786	0.0573908	0.0530132	0.17626	0.0858701
P	84	N	0.215303	0.0886826	0.278853	0.13785	0.475209	0.765105	0.00878338	0.00583623	0.0579384	0.0532528	0.0766093	0.0533647
P	84	Q	0.186912	0.0829609	0.225099	0.131501	0.475623	0.765105	0.013221	0.00790518	0.107106	0.0730654	0.0570665	0.0458396
P	84	R	0.135978	0.0715946	0.150501	0.11484	0.468141	0.765105	0.00979774	0.00637601	0.202734	0.0999648	0.0182907	0.0175993
P	84	S	0.266394	0.0975837	0.144814	0.111912	0.869414	0.811757	0.0410586	0.0177346	0.15539	0.0870367	0.137617	0.0735494
P	84	T	0.130187	0.0694441	0.201491	0.128452	0.362915	0.70405	0.026642	0.0132494	0.174544	0.0929278	0.074767	0.0527567
P	84	V	0.18532	0.0826551	0.11702	0.0998993	0.768493	0.793209	0.0544573	0.0219352	0.164046	0.0894882	0.188458	0.0890796
P	84	W	0.16083	0.0772862	0.151779	0.11531	0.553365	0.776038	0.0323422	0.0150908	0.110908	0.0738808	0.162895	0.0812662
P	84	Y	0.195716	0.0844727	0.103462	0.0914047	0.882381	0.818643	0.0073758	0.00510036	0.0983683	0.0710148	0.032428	0.0297695
K	85	A	0.132017	0.0701568	0.173544	0.123062	0.410649	0.739163	0.0352354	0.0159686	0.111357	0.0739865	0.186732	0.0887296
K	85	C	0.457916	0.127029	0.310374	0.141503	0.919513	0.826789	0.0475788	0.0198335	0.210634	0.101957	0.119944	0.0681382
K	85	D	0.296474	0.10184	0.300607	0.140795	0.62585	0.780024	0.00922287	0.00604643	0.0873284	0.0668843	0.0483817	0.040481
K	85	E	1.1869e-32	1.18747e-32	1.75752e-12	2.21523e-12	3.76661e-22	1.44936e-21	3.86639e-05	3.36969e-05	0.0245669	0.0277873	2.12904e-18	3.12295e-18
K	85	F	0.616196	0.153743	0.604721	0.198882	0.817795	0.802739	0.0854845	0.0309107	0.296876	0.128345	0.165799	0.08241
K	85	G	0.192842	0.0839644	0.233903	0.132722	0.481492	0.765105	0.0228096	0.0117332	0.151107	0.0856802	0.0740767	0.0524754
K	85	H	0.15342	0.0757963	0.28724	0.13844	0.334513	0.682108	0.0276354	0.0135982	0.215598	0.10301	0.0615764	0.0474174
K	85	I	0.182772	0.0823207	0.285792	0.138333	0.396627	0.731715	0.0437244	0.018649	0.180896	0.0944943	0.1334	0.0723483
K	85	L	0.19602	0.0844727	0.329112	0.143286	0.375441	0.719359	0.0064364	0.00463954	0.0439106	0.045068	0.0751914	0.0528489
K	85	M	0.233024	0.0915546	0.110913	0.0957042	1	0.838913	0.0232656	0.0118985	0.105324	0.0724999	0.114777	0.0663342
K	85	N	0.207604	0.0872785	0.196233	0.127884	0.590415	0.778563	0.0151536	0.00878727	0.119818	0.0767711	0.0591602	0.046889
K	85	P	0.235213	0.0917247	0.219303	0.131004	0.615596	0.778563	0.0178459	0.0097957	0.0606437	0.0543863	0.157449	0.0797471
K	85	Q	0.325029	0.107117	0.287198	0.13844	0.702122	0.785994	0.014723	0.00858264	0.143394	0.0842096	0.0469078	0.0398023
K	85	R	0.352931	0.110726	0.316597	0.141961	0.725386	0.786842	0.0343493	0.0157253	0.189489	0.096438	0.0908035	0.0585607
K	85	S	0.214534	0.0884833	0.1415	0.110421	0.785436	0.793451	0.0136507	0.0080964	0.195006	0.098164	0.0315983	0.0291069
K	85	T	0.142298	0.0733888	0.206781	0.129807	0.387469	0.727437	0.051043	0.0208643	0.255519	0.115136	0.0991	0.0611847
K	85	V	0.114204	0.0646348	0.171592	0.122245	0.358583	0.699432	0.0119173	0.00733409	0.0866302	0.0668563	0.0666977	0.0494548
K	85	W	0.504818	0.134536	0.30522	0.141286	0.971898	0.838913	0.103264	0.0361849	0.266763	0.119041	0.23268	0.103289
K	85	Y	0.454486	0.12646	0.397692	0.155986	0.785631	0.793451	0.0755573	0.027915	0.262403	0.117664	0.156713	0.0795714
E	86	A	0.366073	0.112645	0.425837	0.161595	0.606833	0.778563	0.0395377	0.0173318	0.20481	0.100365	0.101974	0.0622293
E	86	C	0.471202	0.12974	0.499114	0.17632	0.708544	0.785994	0.0505861	0.0207233	0.153322	0.0862701	0.187217	0.0887594
E	86	D	0.244148	0.0936584	0.282686	0.138182	0.537802	0.771249	0.0192299	0.010312	0.0865321	0.0668563	0.121285	0.0685538
E	86	F	0.388228	0.11533	0.275634	0.137243	0.853034	0.806163	0.0387503	0.017083	0.210303	0.101886	0.0940703	0.0599084
E	86	G	0.364681	0.112584	0.356751	0.148847	0.684221	0.785994	0.152522	0.0504829	0.279722	0.123138	0.355447	0.14223
E	86	H	0.29081	0.10121	0.239198	0.132932	0.73484	0.790767	0.0413485	0.0178076	0.166991	0.0907308	0.134363	0.0726011
E	86	I	0.422604	0.121086	0.269691	0.135971	0.969457	0.838913	0.0314013	0.0148666	0.0507286	0.0497184	0.44122	0.169034
E	86	K	0.286505	0.101156	0.187773	0.126874	0.833018	0.803292	0.0191093	0.0102597	0.103157	0.0720069	0.0909897	0.0586107
E	86	L	0.362617	0.112245	0.326667	0.143286	0.718476	0.785994	0.0301514	0.0144344	0.115683	0.0752528	0.148503	0.0770513
E	86	M	0.313851	0.105436	0.240179	0.133076	0.755566	0.793209	0.0504791	0.0207233	0.157288	0.0876125	0.182272	0.087535
E	86	N	0.293524	0.101302	0.255223	0.134008	0.685124	0.785994	0.007111	0.00497171	0.0501685	0.0493997	0.0714199	0.0515498
E	86	P	0.0708177	0.0433642	0.210204	0.130768	0.193703	0.440656	0.0212399	0.0111199	0.151248	0.0856802	0.0674365	0.0499341
E	86	Q	0.138407	0.0724775	0.110182	0.0955876	0.589906	0.778563	0.0297502	0.0143199	0.113114	0.0746331	0.147612	0.0769114
E	86	R	0.190569	0.0834711	0.202101	0.128452	0.532892	0.77067	0.0103676	0.00661597	0.148151	0.0849857	0.0293073	0.0272822
E	86	S	0.221938	0.0892899	0.333414	0.144106	0.422971	0.75261	0.0422432	0.0180871	0.186093	0.0953224	0.117567	0.0673108
E	86	T	0.315767	0.105745	0.352665	0.148429	0.591567	0.778563	0.0405624	0.017589	0.161097	0.0888917	0.133211	0.0723407
E	86	V	0.41579	0.120168	0.370148	0.151374	0.757964	0.793209	0.0662395	0.0252468	0.240731	0.110679	0.147412	0.0768816
E	86	W	0.433323	0.122717	0.452995	0.168121	0.682399	0.785994	0.0272767	0.0134969	0.101168	0.0715186	0.145885	0.076603
E	86	Y	0.575019	0.14673	1	0.290401	0.520566	0.77067	0.0488214	0.0202344	0.268193	0.119391	0.0961434	0.0604164
_	87	E	NA	NA	NA	NA	NA	NA	NA	NA	NA	NA	NA	NA
_	87	K	NA	NA	0.0601357	0.056965	NA	NA	0.743049	0.208596	0.930869	0.318864	0.0606898	0.0472794
_	87	Q	NA	NA	NA	NA	NA	NA	NA	NA	0.943371	0.32215	NA	NA
_	87	W	NA	NA	NA	NA	0.0608621	0.152624	NA	NA	NA	NA	NA	NA

## Sheet: p and q values nonsense
Ref aa	Position #	Mutant aa	LentiX293T.pval	LentiX293T.qval	LentiX293T.1.pval	LentiX293T.1.qval	LentiX293T.2.pval	LentiX293T.2.qval	Jurkat.pval	Jurkat.qval	Jurkat.1.pval	Jurkat.1.qval	Jurkat.2.pval	Jurkat.2.qval
E	2	_	0.0519933	0.0330533	0.0561963	0.054442	0.625761	0.780024	0.0541239	0.0218208	0.0554291	0.0522392	0.652881	0.232929
P	3	_	NA	NA	0.0546332	0.0535744	0.00717884	0.0202572	0.00104424	0.000877213	0.00727796	0.00892409	0.0593876	0.046889
V	4	_	0.0567926	0.0357936	0.0560471	0.054407	NA	NA	NA	NA	NA	NA	NA	NA
P	6	_	0.0552037	0.0349124	0.0553696	0.0540764	0.648101	0.785994	0.50814	0.150692	0.644455	0.239556	0.635103	0.228703
R	7	_	NA	NA	NA	NA	0.851648	0.806163	0.782614	0.21804	0.8431	0.294068	NA	NA
L	8	_	NA	NA	NA	NA	NA	NA	0.00698413	0.00492195	0.0559584	0.0523885	0.0569873	0.0458396
E	9	_	NA	NA	NA	NA	0.0575502	0.146957	0.0578502	0.0228358	NA	NA	0.0583009	0.0464168
P	10	_	NA	NA	NA	NA	0.0554219	0.142565	0.651677	0.186258	NA	NA	0.651948	0.232904
W	11	_	3.00819e-24	2.81002e-24	1.58887e-06	1.79161e-06	5.62858e-58	1.3338e-56	4.1227e-16	4.24636e-16	9.61856e-08	1.4178e-07	8.02564e-10	9.02542e-10
H	13	_	NA	NA	NA	NA	NA	NA	NA	NA	0.930876	0.318864	NA	NA
P	14	_	0.0412289	0.0265793	0.449564	0.167643	0.0501057	0.131062	0.0517845	0.0210699	0.516545	0.200393	0.0581304	0.0463844
G	15	_	0.398295	0.11724	0.868823	0.262895	0.00016289	0.000475989	0.00803273	0.00546063	0.00793436	0.00958058	NA	NA
S	16	_	0.803302	0.187955	0.866812	0.262758	0.0542115	0.140226	0.0557421	0.0222098	0.0553929	0.0522392	NA	NA
Q	17	_	3.21642e-47	3.57987e-47	2.47179e-43	6.61183e-43	2.74617e-05	8.12674e-05	0.00727627	0.00505327	0.00748576	0.00909838	0.640917	0.22992
P	18	_	NA	NA	NA	NA	NA	NA	NA	NA	NA	NA	NA	NA
K	19	_	NA	NA	NA	NA	0.0605626	0.152146	NA	NA	NA	NA	NA	NA
T	20	_	NA	NA	NA	NA	0.0572185	0.146378	NA	NA	NA	NA	NA	NA
A	21	_	0.0574391	0.0361389	NA	NA	0.0582034	0.148083	NA	NA	NA	NA	NA	NA
C	22	_	NA	NA	0.0624631	0.0586258	1.63261e-25	6.70708e-25	0.00768811	0.00526687	0.0571691	0.052985	0.0618976	0.0475955
T	23	_	NA	NA	NA	NA	0.00728456	0.0205141	NA	NA	0.0590488	0.053761	NA	NA
N	24	_	0.0587433	0.0368329	0.0581249	0.0555283	NA	NA	0.75085	0.210652	0.927161	0.318182	0.0584264	0.0464317
C	25	_	3.41148e-10	2.7455e-10	2.07726e-05	2.27311e-05	3.87546e-06	1.17423e-05	6.267e-07	5.72146e-07	0.00696383	0.00857686	2.85965e-05	2.92353e-05
Y	26	_	0.00107591	0.000789522	0.0601356	0.056965	0.00730978	0.0205437	NA	NA	0.0587095	0.0536943	NA	NA
C	27	_	0.00724358	0.00497641	0.0529234	0.0522168	0.0620352	0.155009	NA	NA	NA	NA	NA	NA
K	28	_	0.00722709	0.00497641	0.0565471	0.0544565	0.0584434	0.148424	0.459737	0.137538	0.0582449	0.0534458	0.0605439	0.0472794
K	29	_	NA	NA	NA	NA	NA	NA	NA	NA	NA	NA	NA	NA
C	30	_	NA	NA	0.0620577	0.0583591	0.0613924	0.153678	0.793696	0.220849	NA	NA	0.812992	0.279344
C	31	_	5.09539e-07	3.98677e-07	0.00704713	0.00739235	2.32689e-05	6.90057e-05	0.608941	0.175749	0.604981	0.228874	NA	NA
F	32	_	0.484387	0.130998	0.597647	0.197717	0.643787	0.784206	0.525152	0.15538	0.650309	0.240764	0.656082	0.233917
H	33	_	NA	NA	0.0559468	0.054407	NA	NA	NA	NA	NA	NA	NA	NA
C	34	_	NA	NA	NA	NA	0.0596192	0.150861	0.00766436	0.00525875	0.00752354	0.00912428	NA	NA
Q	35	_	0.00103646	0.000763634	0.00709427	0.00742562	0.0577511	0.147201	0.00109586	0.000918832	0.00731279	0.00893921	0.062003	0.0476087
C	37	_	6.3306e-07	4.93216e-07	0.000145363	0.000156228	0.00117723	0.00339039	0.527598	0.155939	0.0548431	0.0518701	NA	NA
F	38	_	0.0072961	0.0050031	0.0565506	0.0544565	0.0590041	0.149576	NA	NA	NA	NA	NA	NA
M	39	_	NA	NA	NA	NA	NA	NA	NA	NA	NA	NA	NA	NA
T	40	_	0.0443095	0.0284152	0.443355	0.166512	0.0503831	0.131541	0.00665198	0.0047408	0.00713969	0.00877396	0.507818	0.189308
K	41	_	0.846623	0.195469	0.0534293	0.0525008	0.882836	0.818643	NA	NA	0.00103208	0.001303	NA	NA
L	43	_	NA	NA	NA	NA	NA	NA	0.50473	0.149882	0.0623844	0.0550941	0.0567533	0.0457241
G	44	_	NA	NA	NA	NA	NA	NA	0.909528	0.24747	NA	NA	NA	NA
S	46	_	NA	NA	0.0531655	0.0523485	0.053398	0.138635	0.0563044	0.0223426	0.0578503	0.0532528	0.637564	0.22913
Y	47	_	NA	NA	0.057308	0.0550757	0.00787568	0.0219574	2.68287e-05	2.35681e-05	0.0073369	0.00893921	0.00124247	0.00123742
G	48	_	NA	NA	NA	NA	0.00761203	0.0213074	0.0618877	0.0239879	0.0614437	0.054574	NA	NA
R	49	_	0.791962	0.186015	0.886045	0.266969	0.638731	0.783295	0.990398	0.265705	0.870755	0.302761	0.674135	0.239405
K	50	_	NA	NA	NA	NA	NA	NA	NA	NA	0.0566023	0.052813	0.0622158	0.0476366
K	51	_	NA	NA	NA	NA	NA	NA	NA	NA	NA	NA	NA	NA
R	52	_	NA	NA	0.0576425	0.0552868	NA	NA	NA	NA	NA	NA	0.0592684	0.046889
R	53	_	NA	NA	NA	NA	NA	NA	0.0606255	0.0236857	NA	NA	0.0611144	0.0473304
Q	54	_	0.000151185	0.000114145	0.0578256	0.0553521	0.00105351	0.00304034	0.163166	0.0536045	0.0589757	0.053761	NA	NA
R	55	_	0.325791	0.107132	0.598521	0.197789	0.00753777	0.0211419	0.00125573	0.0010489	0.00791191	0.00957433	0.0663003	0.0492278
R	56	_	0.000155992	0.000117532	0.00716143	0.00746346	0.00766968	0.0214258	0.000167484	0.000144543	0.00733868	0.00893921	0.00824797	0.00802201
R	57	_	NA	NA	NA	NA	0.771208	0.793209	NA	NA	NA	NA	NA	NA
Q	60	_	NA	NA	0.927159	0.276056	0.943933	0.833337	0.00857437	0.00574051	0.943375	0.32215	0.00134274	0.00133481
N	61	_	0.955273	0.214864	0.690239	0.219801	0.862796	0.808822	0.94584	0.255462	0.056902	0.052985	NA	NA
S	62	_	NA	NA	0.776191	0.240182	0.826916	0.803292	0.934151	0.25246	0.059698	0.0540406	NA	NA
Q	63	_	0.0608274	0.0380745	0.0603474	0.0569733	NA	NA	0.681526	0.193413	NA	NA	0.692134	0.24451
Q	66	_	0.967201	0.21728	1	0.290401	0.959337	0.835406	1	0.265705	1	0.333675	0.962488	0.322299
S	68	_	0.772028	0.182858	0.720666	0.226939	0.94394	0.833337	NA	NA	NA	NA	NA	NA
S	70	_	0.685577	0.166805	0.834288	0.254561	0.716972	0.785994	0.740989	0.208267	0.912232	0.314226	NA	NA
K	71	_	1	0.222329	0.845009	0.257018	0.682854	0.785994	0.80172	0.222802	0.862555	0.300098	NA	NA
Q	72	_	NA	NA	NA	NA	0.0605624	0.152146	NA	NA	NA	NA	NA	NA
R	78	_	NA	NA	NA	NA	0.0598251	0.151109	0.000188454	0.000162008	0.00839761	0.010096	0.00817127	0.00796175
G	79	_	NA	NA	NA	NA	NA	NA	0.89022	0.243265	NA	NA	NA	NA
T	82	_	NA	NA	0.0595779	0.0566914	NA	NA	NA	NA	NA	NA	NA	NA
P	84	_	NA	NA	NA	NA	NA	NA	0.056228	0.0223426	0.0558722	0.0523885	NA	NA
K	85	_	NA	NA	NA	NA	NA	NA	0.0664896	0.0252837	0.0659796	0.0567827	NA	NA
E	86	_	0.833629	0.193199	0.705551	0.223055	0.909917	0.825992	0.828389	0.22906	0.701375	0.254929	NA	NA

## Sheet: p values missense <50%>
Ref aa	Position #	Alt aa	Jurkat1.pval	Jurkat.2.pval	Jurkat.pval	LentiX293T.1.pval	LentiX293T.2.pval	LentiX293T.pval
E	2	A	1.65923e-44	1.03754e-37	1.65923e-44	7.03631e-30	6.33231e-25	7.03631e-30
E	2	P	5.64756e-35	4.12913e-56	4.12913e-56	6.43827e-47	2.29981e-63	2.29981e-63
E	2	C	1.18167e-25	6.18169e-49	6.18169e-49	1.41072e-36	1.02033e-23	1.41072e-36
E	2	G	6.66292e-29	2.50599e-33	2.50599e-33	1.01983e-20	3.87791e-21	3.87791e-21
E	2	R	3.00312e-18	2.25198e-31	2.25198e-31	1.29139e-17	7.74868e-11	1.29139e-17
E	2	F	3.35493e-09	6.8795e-11	6.8795e-11	4.66195e-16	4.83297e-12	4.66195e-16
E	2	I	3.14644e-24	1.73519e-20	3.14644e-24	1.89264e-12	2.40183e-08	1.89264e-12
E	2	K	5.76792e-20	1.15988e-36	1.15988e-36	6.08272e-09	1.80836e-11	1.80836e-11
E	2	W	1.42982e-14	2.60939e-12	1.42982e-14	1.30657e-10	7.04603e-08	1.30657e-10
E	2	N	0.000102823	0.0668349	0.000102823	0.141425	2.1451e-07	2.1451e-07
E	2	T	4.89589e-08	0.000260903	4.89589e-08	0.00767232	3.01799e-06	3.01799e-06
E	2	Y	2.72246e-07	2.23053e-09	2.23053e-09	7.96461e-06	0.0206702	7.96461e-06
E	2	D	7.41247e-16	0.00115866	7.41247e-16	0.000177452	0.000321246	0.000177452
E	2	S	0.00750128	8.51908e-09	8.51908e-09	0.987501	0.00222201	0.00222201
E	2	Q	0.00486216	0.285206	0.00486216	0.0170354	0.00526588	0.00526588
E	2	L	8.48817e-10	8.18177e-10	8.18177e-10	0.00772487	0.0338702	0.00772487
E	2	V	6.24279e-08	6.45216e-09	6.45216e-09	0.00795524	0.666367	0.00795524
E	2	H	2.06741e-11	2.81002e-09	2.06741e-11	0.0117765	0.0317749	0.0117765
E	2	M	0.356113	0.0015972	0.0015972	0.316673	0.0281142	0.0281142
P	3	R	1.50817e-34	1.06133e-29	1.50817e-34	4.23805e-29	2.60633e-15	4.23805e-29
P	3	K	5.44264e-36	7.38062e-45	7.38062e-45	3.34295e-23	2.94055e-19	3.34295e-23
P	3	V	8.57302e-06	6.18734e-07	6.18734e-07	0.0122534	3.75977e-09	3.75977e-09
P	3	G	1.2554e-07	1.43995e-10	1.43995e-10	3.85429e-07	1.35182e-06	3.85429e-07
P	3	N	3.47634e-19	1.67302e-17	3.47634e-19	4.59501e-06	4.32557e-06	4.32557e-06
P	3	L	9.14324e-08	0.00139329	9.14324e-08	4.50854e-05	0.000747581	4.50854e-05
P	3	M	0.146596	0.0335387	0.0335387	5.97058e-05	0.000322476	5.97058e-05
P	3	F	0.601877	0.704786	0.601877	0.0287676	0.00203799	0.00203799
P	3	Y	0.311623	0.0428286	0.0428286	0.484868	0.0022551	0.0022551
P	3	I	1.38577e-05	4.44216e-06	4.44216e-06	0.00333952	0.0189228	0.00333952
P	3	D	2.71876e-06	1.89454e-09	1.89454e-09	0.00656106	0.950087	0.00656106
P	3	A	0.297595	0.36016	0.297595	0.0118878	0.0193499	0.0118878
P	3	C	0.676606	0.970848	0.676606	0.0160385	0.0189392	0.0160385
P	3	T	0.329625	0.00651624	0.00651624	0.960435	0.0421441	0.0421441
P	3	H	1.27767e-17	2.06896e-14	1.27767e-17	0.113885	0.487704	0.113885
P	3	W	0.0751192	0.00268731	0.00268731	0.244933	0.331864	0.244933
P	3	E	0.394072	0.00332929	0.00332929	0.310827	0.382437	0.310827
P	3	Q	0.00131049	0.312611	0.00131049	0.370375	0.831366	0.370375
P	3	S	8.90183e-05	3.77593e-06	3.77593e-06	0.627806	0.885079	0.627806
V	4	K	1.86055e-31	2.68303e-36	2.68303e-36	7.37598e-37	3.19098e-32	7.37598e-37
V	4	R	3.08112e-47	1.2102e-30	3.08112e-47	1.51492e-31	2.44137e-27	1.51492e-31
V	4	N	1.43624e-31	4.40781e-33	4.40781e-33	2.36478e-14	1.37296e-10	2.36478e-14
V	4	G	3.52572e-20	4.67909e-21	4.67909e-21	1.99695e-12	4.02596e-08	1.99695e-12
V	4	S	1.00298e-21	3.66821e-19	1.00298e-21	2.91023e-10	0.00146136	2.91023e-10
V	4	W	8.90243e-08	3.01614e-27	3.01614e-27	2.935e-08	1.57199e-07	2.935e-08
V	4	E	7.38839e-41	1.00088e-49	1.00088e-49	1.57854e-06	5.68899e-05	1.57854e-06
V	4	I	9.2003e-06	3.22383e-05	9.2003e-06	0.907042	3.075e-06	3.075e-06
V	4	D	2.51378e-43	2.85265e-30	2.51378e-43	2.03296e-05	0.000198127	2.03296e-05
V	4	H	5.24738e-14	2.36718e-17	2.36718e-17	0.0077067	0.01625	0.0077067
V	4	P	3.96317e-11	4.37822e-18	4.37822e-18	0.00837811	0.0268933	0.00837811
V	4	M	0.000264718	1.36629e-06	1.36629e-06	0.563362	0.0118091	0.0118091
V	4	C	0.112276	0.000410122	0.000410122	0.113649	0.0139315	0.0139315
V	4	F	6.21059e-17	6.30027e-15	6.21059e-17	0.546983	0.017624	0.017624
V	4	L	1.8567e-05	1.33698e-10	1.33698e-10	0.040393	0.794504	0.040393
V	4	Y	6.56243e-07	1.73856e-11	1.73856e-11	0.23229	0.976429	0.23229
V	4	A	4.67552e-05	3.84805e-08	3.84805e-08	0.251575	0.928017	0.251575
V	4	Q	4.39907e-10	3.8471e-11	3.8471e-11	0.292955	0.86711	0.292955
V	4	T	0.000909699	0.000228183	0.000228183	0.715853	0.462347	0.462347
D	5	F	8.06424e-33	3.82034e-40	3.82034e-40	2.0272e-79	2.18332e-32	2.0272e-79
D	5	W	1.10471e-30	1.86481e-31	1.86481e-31	1.62272e-45	5.29963e-34	1.62272e-45
D	5	Y	5.28931e-46	2.09813e-55	2.09813e-55	2.75738e-37	2.01186e-35	2.75738e-37
D	5	I	3.28748e-40	2.45099e-30	3.28748e-40	1.32993e-35	2.20805e-27	1.32993e-35
D	5	R	1.1663e-32	7.67853e-36	7.67853e-36	2.4307e-29	4.55233e-30	4.55233e-30
D	5	V	8.49733e-52	1.36011e-31	8.49733e-52	1.23666e-28	2.68737e-22	1.23666e-28
D	5	K	5.64852e-39	6.89845e-41	6.89845e-41	5.70676e-22	1.58059e-26	1.58059e-26
D	5	A	8.40754e-20	3.15892e-18	8.40754e-20	1.4647e-23	2.08614e-14	1.4647e-23
D	5	G	2.03874e-20	2.14868e-25	2.14868e-25	4.08978e-23	5.12775e-18	4.08978e-23
D	5	T	5.44668e-39	1.01347e-46	1.01347e-46	9.81147e-15	4.30095e-20	4.30095e-20
D	5	L	4.70234e-20	2.31959e-33	2.31959e-33	6.43369e-18	1.26298e-17	6.43369e-18
D	5	M	3.92025e-24	5.27638e-20	3.92025e-24	1.27259e-15	4.03305e-12	1.27259e-15
D	5	H	4.78917e-13	7.12905e-17	7.12905e-17	6.61648e-12	1.09106e-10	6.61648e-12
D	5	Q	8.88973e-13	1.63442e-17	1.63442e-17	3.62371e-05	8.82731e-06	8.82731e-06
D	5	C	1.36688e-07	6.36651e-10	6.36651e-10	1.52569e-05	0.00658253	1.52569e-05
D	5	P	5.07447e-13	1.67524e-13	1.67524e-13	0.000105984	0.0570158	0.000105984
D	5	S	9.5924e-06	5.34091e-06	5.34091e-06	0.315733	0.00180516	0.00180516
D	5	E	0.593698	0.869267	0.593698	0.977824	0.00448228	0.00448228
D	5	N	0.000691985	2.00277e-05	2.00277e-05	0.450142	0.0358479	0.0358479
P	6	K	1.92947e-32	3.09449e-47	3.09449e-47	1.89558e-32	8.84512e-43	8.84512e-43
P	6	W	1.08363e-17	1.74218e-13	1.08363e-17	1.18187e-06	4.25046e-09	4.25046e-09
P	6	F	1.01213e-05	0.0174671	1.01213e-05	0.0140493	6.54286e-09	6.54286e-09
P	6	Y	2.13217e-16	0.000122267	2.13217e-16	0.00168638	4.46269e-07	4.46269e-07
P	6	H	1.12962e-07	0.0286577	1.12962e-07	0.00737033	1.54613e-05	1.54613e-05
P	6	C	0.0335219	0.622219	0.0335219	0.228453	4.55809e-05	4.55809e-05
P	6	T	0.207089	0.892475	0.207089	5.53152e-05	0.000393047	5.53152e-05
P	6	R	3.03971e-12	5.81135e-20	5.81135e-20	5.7955e-05	0.00374517	5.7955e-05
P	6	G	0.244172	0.0987718	0.0987718	0.0040513	7.76053e-05	7.76053e-05
P	6	V	0.326606	0.755808	0.326606	0.00464885	0.000447001	0.000447001
P	6	A	0.000417387	0.197382	0.000417387	0.598706	0.00099734	0.00099734
P	6	L	4.7405e-08	2.44099e-16	2.44099e-16	0.00694868	0.0136045	0.00694868
P	6	D	0.0905071	0.000157953	0.000157953	0.685448	0.0264485	0.0264485
P	6	M	0.950839	0.0753356	0.0753356	0.0428707	0.107102	0.0428707
P	6	Q	0.00805501	6.6722e-07	6.6722e-07	0.390719	0.0998278	0.0998278
P	6	S	0.864812	0.58586	0.58586	0.163254	0.101402	0.101402
P	6	I	0.4839	0.184353	0.184353	0.670182	0.139829	0.139829
P	6	E	2.71423e-05	1.88404e-10	1.88404e-10	0.89981	0.511275	0.511275
P	6	N	0.00353214	0.00033551	0.00033551	0.880451	0.628706	0.628706
R	7	P	7.04597e-22	9.38587e-31	9.38587e-31	2.00842e-20	4.10457e-22	4.10457e-22
R	7	S	6.77738e-32	3.61658e-14	6.77738e-32	4.96402e-10	2.46092e-17	2.46092e-17
R	7	E	1.80224e-33	5.5319e-28	1.80224e-33	1.06356e-06	6.07951e-14	6.07951e-14
R	7	A	2.14967e-27	3.70559e-22	2.14967e-27	4.51782e-07	9.89879e-13	9.89879e-13
R	7	T	1.89561e-19	2.05919e-28	2.05919e-28	1.79743e-07	5.68539e-12	5.68539e-12
R	7	W	2.03266e-16	7.58673e-07	2.03266e-16	9.89785e-05	1.2347e-11	1.2347e-11
R	7	N	1.61391e-30	3.34446e-12	1.61391e-30	1.47628e-06	3.31652e-11	3.31652e-11
R	7	L	2.90828e-18	4.42418e-13	2.90828e-18	0.000162066	5.28651e-11	5.28651e-11
R	7	H	1.82913e-18	3.37809e-09	1.82913e-18	1.48475e-08	1.60422e-10	1.60422e-10
R	7	Y	8.23426e-13	9.72317e-08	8.23426e-13	7.74744e-10	2.36301e-10	2.36301e-10
R	7	D	9.83935e-21	1.28015e-12	9.83935e-21	2.46108e-09	0.000129692	2.46108e-09
R	7	Q	2.41599e-21	6.13169e-12	2.41599e-21	2.71566e-08	2.81022e-09	2.81022e-09
R	7	G	2.48456e-15	2.59687e-10	2.48456e-15	5.46183e-08	9.86085e-06	5.46183e-08
R	7	M	2.2208e-15	2.63601e-10	2.2208e-15	5.2734e-06	1.15774e-07	1.15774e-07
R	7	K	1.28536e-17	1.25826e-11	1.28536e-17	2.90523e-06	7.5319e-07	7.5319e-07
R	7	C	2.28638e-17	2.06877e-11	2.28638e-17	8.15438e-07	3.44587e-06	8.15438e-07
R	7	I	0.000180788	0.00192722	0.000180788	0.000310434	9.50175e-07	9.50175e-07
R	7	F	3.53588e-05	1.37902e-07	1.37902e-07	0.000101335	2.10854e-06	2.10854e-06
R	7	V	7.32022e-12	5.45885e-06	7.32022e-12	0.00019582	5.0503e-06	5.0503e-06
L	8	P	7.81434e-39	8.62113e-54	8.62113e-54	2.59185e-44	4.94135e-35	2.59185e-44
L	8	G	1.56508e-32	1.32457e-33	1.32457e-33	1.17949e-31	8.90494e-33	8.90494e-33
L	8	I	4.13109e-07	2.29116e-06	4.13109e-07	1.96784e-11	3.90886e-06	1.96784e-11
L	8	H	8.03443e-11	5.31914e-20	5.31914e-20	1.81552e-06	0.000425612	1.81552e-06
L	8	K	3.84833e-08	6.1002e-13	6.1002e-13	1.93839e-06	0.282493	1.93839e-06
L	8	F	2.50589e-11	2.17933e-11	2.17933e-11	5.3611e-06	0.000707859	5.3611e-06
L	8	T	4.80084e-05	0.00895569	4.80084e-05	4.90855e-05	2.70047e-05	2.70047e-05
L	8	M	0.00951446	0.0888291	0.00951446	0.00396755	8.41728e-05	8.41728e-05
L	8	V	0.00268097	0.42428	0.00268097	0.0237999	0.000113621	0.000113621
L	8	C	0.424692	0.350319	0.350319	0.976	0.000218381	0.000218381
L	8	S	6.7007e-12	3.38841e-10	6.7007e-12	0.000395491	0.181854	0.000395491
L	8	E	0.127394	0.144343	0.127394	0.0632384	0.000582331	0.000582331
L	8	Y	4.75066e-15	3.24112e-14	4.75066e-15	0.00221796	0.0930341	0.00221796
L	8	N	6.47443e-09	5.27461e-18	5.27461e-18	0.0035911	0.00915775	0.0035911
L	8	R	1.19347e-18	9.96247e-20	9.96247e-20	0.0220497	0.00443387	0.00443387
L	8	W	2.3342e-06	0.00335778	2.3342e-06	0.312801	0.360509	0.312801
L	8	A	4.98223e-05	7.18412e-09	7.18412e-09	0.437488	0.689009	0.437488
L	8	D	1.752e-08	4.39274e-08	1.752e-08	0.49789	0.775365	0.49789
L	8	Q	0.102862	4.88269e-06	4.88269e-06	0.511502	0.506107	0.506107
E	9	W	1.9946e-51	3.44489e-67	3.44489e-67	9.23223e-87	2.13924e-64	9.23223e-87
E	9	F	1.757e-36	7.99789e-37	7.99789e-37	3.41705e-66	5.05182e-38	3.41705e-66
E	9	Y	1.41288e-27	2.43264e-40	2.43264e-40	3.601e-50	1.92036e-36	3.601e-50
E	9	I	5.92929e-49	4.22104e-46	5.92929e-49	1.44267e-35	2.43187e-42	2.43187e-42
E	9	R	1.81339e-31	2.93396e-40	2.93396e-40	4.50868e-30	1.15732e-33	1.15732e-33
E	9	K	1.82499e-22	1.04744e-34	1.04744e-34	7.68351e-25	1.9574e-28	1.9574e-28
E	9	H	9.17767e-27	1.2995e-47	1.2995e-47	8.73304e-22	8.00154e-16	8.73304e-22
E	9	P	7.9725e-17	1.21733e-19	1.21733e-19	1.27843e-15	6.79713e-14	1.27843e-15
E	9	N	2.58889e-17	4.29459e-24	4.29459e-24	2.02016e-13	5.71548e-10	2.02016e-13
E	9	A	1.96394e-10	1.41739e-14	1.41739e-14	2.45138e-07	5.01612e-11	5.01612e-11
E	9	L	2.24887e-20	3.12317e-29	3.12317e-29	1.41208e-10	5.42569e-11	5.42569e-11
E	9	V	2.30814e-06	0.000979018	2.30814e-06	0.000323866	4.27942e-07	4.27942e-07
E	9	S	9.19344e-05	0.0076244	9.19344e-05	0.000242067	7.60365e-07	7.60365e-07
E	9	T	4.05643e-18	4.97652e-16	4.05643e-18	2.98858e-05	0.00237358	2.98858e-05
E	9	D	0.00386943	0.367686	0.00386943	0.465356	0.00064402	0.00064402
E	9	M	0.471988	0.00722493	0.00722493	0.0079871	0.0582939	0.0079871
E	9	G	1.3949e-06	1.13906e-07	1.13906e-07	0.104511	0.0188598	0.0188598
E	9	Q	0.0712479	0.000897303	0.000897303	0.729415	0.0944075	0.0944075
E	9	C	0.11555	0.0024139	0.0024139	0.120184	0.212283	0.120184
P	10	W	4.82069e-49	7.04869e-50	7.04869e-50	1.10213e-86	1.74806e-53	1.10213e-86
P	10	F	7.09385e-23	4.47047e-21	7.09385e-23	1.78394e-31	1.69634e-28	1.78394e-31
P	10	Y	5.0738e-28	1.14135e-36	1.14135e-36	3.17862e-30	6.2436e-24	3.17862e-30
P	10	M	5.85739e-19	3.81467e-20	3.81467e-20	6.25327e-27	6.70631e-26	6.25327e-27
P	10	D	7.14011e-16	1.05525e-27	1.05525e-27	4.06641e-14	5.75633e-23	5.75633e-23
P	10	L	9.31634e-22	4.50066e-26	4.50066e-26	2.23053e-17	8.59545e-18	8.59545e-18
P	10	S	0.000104081	2.15895e-06	2.15895e-06	1.52371e-09	1.23265e-12	1.23265e-12
P	10	N	6.31199e-11	1.36559e-05	6.31199e-11	0.000495814	1.03606e-07	1.03606e-07
P	10	E	5.78215e-27	1.95954e-17	5.78215e-27	1.64712e-06	3.85402e-05	1.64712e-06
P	10	A	3.06477e-05	0.00434931	3.06477e-05	1.35788e-05	0.000169612	1.35788e-05
P	10	H	3.50972e-14	9.64932e-16	9.64932e-16	0.000676964	0.317768	0.000676964
P	10	V	2.09069e-12	3.57198e-14	3.57198e-14	0.00140803	0.00100557	0.00100557
P	10	R	2.22164e-10	1.29625e-13	1.29625e-13	0.139476	0.00601141	0.00601141
P	10	K	0.134455	0.0132146	0.0132146	0.0268055	0.00642221	0.00642221
P	10	I	1.71405e-05	0.00201518	1.71405e-05	0.0349234	0.035482	0.0349234
P	10	Q	0.0132601	0.0306286	0.0132601	0.0786617	0.872972	0.0786617
P	10	G	0.0261833	9.92389e-12	9.92389e-12	0.239235	0.321312	0.239235
P	10	C	0.115575	0.117437	0.115575	0.243708	0.291142	0.243708
P	10	T	0.0144118	3.1814e-07	3.1814e-07	0.79764	0.634594	0.634594
W	11	L	9.41741e-28	2.26163e-43	2.26163e-43	2.53637e-37	1.72375e-28	2.53637e-37
W	11	I	4.64132e-25	3.43818e-28	3.43818e-28	2.63916e-32	9.01238e-31	2.63916e-32
W	11	P	8.12824e-53	3.4357e-31	8.12824e-53	1.51765e-26	5.83828e-21	1.51765e-26
W	11	R	4.91895e-32	2.04726e-41	2.04726e-41	1.78911e-24	3.10453e-22	1.78911e-24
W	11	K	3.23622e-31	6.27894e-38	6.27894e-38	5.99336e-23	2.15948e-18	5.99336e-23
W	11	T	9.40042e-16	4.75937e-20	4.75937e-20	3.87513e-16	1.33628e-11	3.87513e-16
W	11	V	1.40211e-33	2.76872e-23	1.40211e-33	3.02049e-05	2.82822e-15	2.82822e-15
W	11	N	1.14645e-17	5.8622e-22	5.8622e-22	1.79115e-07	0.00462207	1.79115e-07
W	11	H	3.08316e-08	5.43062e-15	5.43062e-15	5.53455e-06	0.000135188	5.53455e-06
W	11	F	1.1114e-13	1.60051e-13	1.1114e-13	4.42895e-05	0.000107521	4.42895e-05
W	11	E	0.534657	0.789828	0.534657	0.204864	9.558e-05	9.558e-05
W	11	A	0.0306059	0.0448298	0.0306059	0.00431022	0.0173219	0.00431022
W	11	Q	2.6603e-05	5.31416e-10	5.31416e-10	0.00478236	0.502391	0.00478236
W	11	M	1.57041e-06	3.93668e-10	3.93668e-10	0.739405	0.0402317	0.0402317
W	11	Y	0.669973	0.186763	0.186763	0.0469817	0.0480046	0.0469817
W	11	D	1.27724e-07	3.13919e-08	3.13919e-08	0.685748	0.0622129	0.0622129
W	11	S	0.861686	0.0152123	0.0152123	0.276922	0.282154	0.276922
W	11	G	1.24828e-07	2.49306e-08	2.49306e-08	0.407139	0.76732	0.407139
W	11	C	0.00028846	3.91029e-05	3.91029e-05	0.554198	0.829	0.554198
K	12	P	7.44337e-37	5.58535e-42	5.58535e-42	6.03446e-124	2.61399e-93	6.03446e-124
K	12	L	1.5836e-13	6.88089e-15	6.88089e-15	3.71038e-11	5.9212e-14	5.9212e-14
K	12	E	1.4262e-19	1.79806e-14	1.4262e-19	1.28022e-08	1.74567e-11	1.74567e-11
K	12	D	2.20831e-10	0.00144593	2.20831e-10	1.48859e-09	4.69376e-07	1.48859e-09
K	12	Q	8.68271e-11	1.37033e-15	1.37033e-15	4.62818e-07	2.15692e-09	2.15692e-09
K	12	A	8.52671e-10	3.49931e-05	8.52671e-10	0.135989	1.50134e-07	1.50134e-07
K	12	N	1.0637e-16	3.87853e-08	1.0637e-16	3.41749e-07	0.000156706	3.41749e-07
K	12	H	1.58683e-13	1.31096e-06	1.58683e-13	2.06696e-06	6.16594e-05	2.06696e-06
K	12	R	9.15089e-10	1.31018e-08	9.15089e-10	0.013348	3.30109e-06	3.30109e-06
K	12	M	2.92962e-05	0.0063841	2.92962e-05	0.000984892	0.00014306	0.00014306
K	12	F	0.045801	0.0920394	0.045801	0.0351268	0.000151944	0.000151944
K	12	V	0.320849	0.0123381	0.0123381	0.00024342	0.0726953	0.00024342
K	12	W	0.378519	0.0193453	0.0193453	0.990238	0.00148559	0.00148559
K	12	S	0.0026015	0.777674	0.0026015	0.0286865	0.00178851	0.00178851
K	12	C	0.00684539	0.175679	0.00684539	0.00410787	0.167521	0.00410787
K	12	Y	0.361818	0.0847355	0.0847355	0.0126526	0.0218037	0.0126526
K	12	G	0.000401956	4.52175e-05	4.52175e-05	0.26396	0.0182082	0.0182082
K	12	I	0.58877	0.0587118	0.0587118	0.27236	0.876953	0.27236
K	12	T	0.000311925	0.00316489	0.000311925	0.679283	0.780193	0.679283
H	13	P	1.30492e-63	3.00787e-48	1.30492e-63	2.5216e-82	4.29356e-105	4.29356e-105
H	13	F	2.3503e-37	1.25813e-68	1.25813e-68	8.00222e-65	2.45593e-34	8.00222e-65
H	13	D	2.72894e-32	8.65616e-33	8.65616e-33	1.72722e-36	5.68248e-49	5.68248e-49
H	13	K	1.75276e-29	3.42177e-48	3.42177e-48	2.51121e-48	1.09705e-46	2.51121e-48
H	13	T	6.4301e-41	8.89229e-44	8.89229e-44	1.13674e-42	3.39988e-33	1.13674e-42
H	13	G	1.15972e-15	1.00324e-14	1.15972e-15	3.78299e-25	6.25063e-37	6.25063e-37
H	13	S	2.73135e-33	2.29954e-30	2.73135e-33	1.03121e-21	4.49255e-30	4.49255e-30
H	13	V	5.44188e-31	1.39612e-36	1.39612e-36	5.04393e-25	1.26636e-21	5.04393e-25
H	13	E	9.49646e-27	1.41709e-26	9.49646e-27	6.96146e-22	4.06677e-16	6.96146e-22
H	13	I	4.21434e-24	2.04789e-37	2.04789e-37	5.0048e-20	8.36408e-18	5.0048e-20
H	13	Y	7.75389e-17	1.46978e-24	1.46978e-24	1.66291e-17	5.42057e-17	1.66291e-17
H	13	C	1.06502e-18	1.17363e-30	1.17363e-30	1.85751e-15	5.91403e-16	5.91403e-16
H	13	A	1.07175e-15	1.73484e-19	1.73484e-19	2.70149e-13	6.3973e-10	2.70149e-13
H	13	N	1.82636e-24	1.08268e-24	1.08268e-24	2.29687e-10	9.49551e-09	2.29687e-10
H	13	L	5.12153e-17	9.49535e-17	5.12153e-17	1.86978e-07	3.58527e-08	3.58527e-08
H	13	Q	8.81325e-05	0.0163681	8.81325e-05	5.09374e-05	3.12449e-06	3.12449e-06
H	13	R	1.10403e-11	4.55833e-09	1.10403e-11	0.000544313	0.0490832	0.000544313
H	13	M	0.659268	0.103217	0.103217	0.229168	0.332846	0.229168
H	13	W	0.0270153	3.58495e-09	3.58495e-09	0.817927	0.929569	0.817927
P	14	W	3.60438e-27	1.57974e-39	1.57974e-39	4.88455e-30	1.2623e-32	1.2623e-32
P	14	L	2.04163e-24	6.09236e-26	6.09236e-26	2.79423e-20	9.19573e-29	9.19573e-29
P	14	Y	8.51331e-29	1.11706e-25	8.51331e-29	2.34637e-21	2.72452e-17	2.34637e-21
P	14	F	3.43043e-35	3.71313e-35	3.43043e-35	8.13495e-10	6.87974e-16	6.87974e-16
P	14	I	1.95338e-17	9.60065e-23	9.60065e-23	8.24193e-09	8.1704e-16	8.1704e-16
P	14	R	9.63031e-26	3.28197e-35	3.28197e-35	2.981e-09	0.0210341	2.981e-09
P	14	N	1.85957e-22	2.50185e-15	1.85957e-22	4.01086e-09	3.25191e-09	3.25191e-09
P	14	M	8.58205e-14	1.04214e-15	1.04214e-15	0.000138158	3.77841e-09	3.77841e-09
P	14	G	2.45384e-15	7.07964e-22	7.07964e-22	4.30328e-08	2.28154e-06	4.30328e-08
P	14	H	3.26736e-12	1.78388e-19	1.78388e-19	5.26918e-08	0.00128851	5.26918e-08
P	14	D	1.62371e-22	8.99691e-17	1.62371e-22	7.68877e-07	0.00368306	7.68877e-07
P	14	C	2.9644e-12	5.45941e-21	5.45941e-21	2.19217e-05	2.03249e-06	2.03249e-06
P	14	K	1.4491e-19	5.22055e-17	1.4491e-19	4.70612e-05	3.21068e-06	3.21068e-06
P	14	S	2.21165e-14	4.20575e-14	2.21165e-14	2.3563e-05	0.000383152	2.3563e-05
P	14	V	1.52516e-12	1.86751e-16	1.86751e-16	0.000711772	4.12549e-05	4.12549e-05
P	14	T	1.71072e-18	9.07398e-17	1.71072e-18	0.000147441	0.00511133	0.000147441
P	14	Q	6.80215e-09	1.68016e-13	1.68016e-13	0.0305902	0.000174852	0.000174852
P	14	A	9.66747e-20	1.54572e-14	9.66747e-20	0.030859	0.107291	0.030859
P	14	E	1.08053e-12	2.26033e-07	1.08053e-12	0.619363	0.668653	0.619363
G	15	Y	4.57328e-33	4.71266e-86	4.71266e-86	3.25958e-100	1.62842e-72	3.25958e-100
G	15	I	5.31822e-30	9.77416e-37	9.77416e-37	9.42247e-98	4.88732e-48	9.42247e-98
G	15	L	1.54501e-47	1.50997e-25	1.54501e-47	2.61786e-79	3.44476e-58	2.61786e-79
G	15	W	1.18683e-51	1.15867e-25	1.18683e-51	3.12963e-67	1.70354e-75	1.70354e-75
G	15	H	3.98508e-31	2.20384e-66	2.20384e-66	3.92724e-67	1.91665e-60	3.92724e-67
G	15	Q	3.60625e-38	6.0039e-48	6.0039e-48	1.89597e-65	3.6734e-35	1.89597e-65
G	15	K	5.26519e-37	1.57494e-53	1.57494e-53	7.85943e-55	5.66371e-58	5.66371e-58
G	15	F	1.80139e-32	1.07094e-37	1.07094e-37	6.46957e-52	8.24501e-44	6.46957e-52
G	15	M	1.22707e-34	2.94674e-23	1.22707e-34	3.7653e-37	2.67751e-47	2.67751e-47
G	15	V	1.16373e-11	3.35426e-28	3.35426e-28	1.35739e-45	1.1616e-22	1.35739e-45
G	15	C	7.51133e-29	4.61998e-62	4.61998e-62	1.61553e-41	8.94099e-34	1.61553e-41
G	15	E	2.61059e-31	1.95351e-41	1.95351e-41	6.17815e-37	3.78729e-25	6.17815e-37
G	15	D	2.29012e-18	4.79105e-27	4.79105e-27	3.59284e-32	4.6717e-26	3.59284e-32
G	15	N	1.18601e-33	7.90486e-31	1.18601e-33	8.29504e-27	2.50551e-21	8.29504e-27
G	15	R	1.89218e-39	3.85758e-44	3.85758e-44	8.8771e-26	3.30518e-16	8.8771e-26
G	15	A	7.79449e-24	1.63599e-16	7.79449e-24	3.27995e-15	1.15463e-07	3.27995e-15
G	15	S	0.000371073	0.000182473	0.000182473	5.91667e-05	3.76132e-06	3.76132e-06
G	15	P	1.09938e-06	1.7606e-12	1.7606e-12	0.0020988	0.0184282	0.0020988
G	15	T	0.407599	0.0860169	0.0860169	0.0211791	0.00532779	0.00532779
S	16	P	1.95662e-47	6.40029e-42	1.95662e-47	3.98134e-109	1.03231e-59	3.98134e-109
S	16	H	3.60412e-27	5.47349e-43	5.47349e-43	5.00457e-96	3.54889e-54	5.00457e-96
S	16	D	6.58838e-48	1.15703e-42	6.58838e-48	3.64075e-90	5.4087e-55	3.64075e-90
S	16	W	4.90787e-40	1.07308e-29	4.90787e-40	2.27165e-62	2.02323e-88	2.02323e-88
S	16	R	1.34018e-45	4.47467e-28	1.34018e-45	6.44421e-70	5.1086e-81	5.1086e-81
S	16	F	2.54144e-48	1.23535e-47	2.54144e-48	1.01268e-67	2.15819e-69	2.15819e-69
S	16	Y	6.44608e-35	3.71548e-35	3.71548e-35	6.42452e-62	1.01502e-65	1.01502e-65
S	16	K	2.89503e-32	4.34689e-40	4.34689e-40	1.97018e-60	2.75639e-54	1.97018e-60
S	16	L	8.26367e-34	2.61824e-28	8.26367e-34	6.61933e-56	1.62688e-57	1.62688e-57
S	16	N	3.01199e-35	4.31102e-31	3.01199e-35	4.0321e-42	2.16932e-46	2.16932e-46
S	16	Q	3.11533e-11	4.60592e-24	4.60592e-24	1.49802e-22	1.35145e-15	1.49802e-22
S	16	A	6.1442e-05	1.10181e-12	1.10181e-12	3.60216e-16	6.93135e-09	3.60216e-16
S	16	M	1.50185e-19	1.45738e-21	1.45738e-21	0.000713808	2.7574e-14	2.7574e-14
S	16	G	1.46637e-17	9.98864e-29	9.98864e-29	6.05013e-14	1.10759e-05	6.05013e-14
S	16	E	4.83433e-09	6.11044e-15	6.11044e-15	2.06644e-09	0.12351	2.06644e-09
S	16	C	1.49597e-05	0.0765274	1.49597e-05	0.00238536	1.33553e-06	1.33553e-06
S	16	T	2.18151e-06	0.000831902	2.18151e-06	0.00107545	3.02045e-06	3.02045e-06
S	16	I	2.06873e-14	2.2024e-26	2.2024e-26	0.000191277	0.00637787	0.000191277
S	16	V	0.00274767	0.146632	0.00274767	0.000924125	0.00936456	0.000924125
Q	17	P	7.03315e-48	1.79301e-65	1.79301e-65	1.04852e-80	4.55826e-101	4.55826e-101
Q	17	F	1.08054e-20	2.50251e-26	2.50251e-26	5.93869e-15	4.55137e-25	4.55137e-25
Q	17	W	7.86183e-19	9.42177e-30	9.42177e-30	4.31425e-15	7.392e-23	7.392e-23
Q	17	D	3.17694e-13	6.67779e-15	6.67779e-15	1.31451e-07	8.53156e-17	8.53156e-17
Q	17	R	7.6321e-21	1.78227e-21	1.78227e-21	6.73401e-09	1.96039e-16	1.96039e-16
Q	17	Y	9.24789e-14	1.91501e-16	1.91501e-16	2.57896e-15	5.31679e-08	2.57896e-15
Q	17	A	6.04452e-14	0.000149209	6.04452e-14	9.67099e-11	3.63058e-12	3.63058e-12
Q	17	I	4.03805e-11	3.20302e-13	3.20302e-13	4.77704e-08	4.61595e-12	4.61595e-12
Q	17	K	7.77368e-18	1.19052e-11	7.77368e-18	1.66106e-06	1.81416e-09	1.81416e-09
Q	17	V	5.19961e-14	1.40479e-11	5.19961e-14	2.51319e-09	2.0288e-09	2.0288e-09
Q	17	S	1.01234e-07	0.0147369	1.01234e-07	3.54178e-06	1.63092e-07	1.63092e-07
Q	17	C	0.405593	0.0155672	0.0155672	0.0019021	7.74707e-05	7.74707e-05
Q	17	M	1.8418e-08	3.34743e-05	1.8418e-08	0.00467712	0.000130469	0.000130469
Q	17	E	0.477895	0.0357243	0.0357243	0.180424	0.000935406	0.000935406
Q	17	G	0.231966	0.322697	0.231966	0.00871098	0.00155344	0.00155344
Q	17	N	0.00133861	0.0515157	0.00133861	0.0169116	0.880599	0.0169116
Q	17	T	0.499987	0.504266	0.499987	0.765247	0.0447062	0.0447062
Q	17	H	0.077096	0.000619492	0.000619492	0.322079	0.141915	0.141915
Q	17	L	0.00442993	0.00213604	0.00213604	0.775122	0.998211	0.775122
P	18	F	5.89894e-26	2.61051e-24	5.89894e-26	1.0828e-48	6.54052e-113	6.54052e-113
P	18	Y	1.44117e-24	2.05371e-55	2.05371e-55	7.08522e-51	4.92639e-99	4.92639e-99
P	18	W	3.43962e-46	1.39089e-53	1.39089e-53	4.56436e-83	1.04076e-80	4.56436e-83
P	18	H	2.47647e-18	4.47772e-26	4.47772e-26	1.71902e-79	1.83168e-43	1.71902e-79
P	18	E	3.29924e-39	3.91082e-71	3.91082e-71	1.46201e-44	5.09147e-68	5.09147e-68
P	18	D	1.21455e-56	1.70871e-34	1.21455e-56	7.48428e-66	5.50565e-57	7.48428e-66
P	18	N	1.36752e-26	9.16972e-52	9.16972e-52	3.60595e-55	1.57561e-32	3.60595e-55
P	18	K	1.94636e-33	1.86356e-30	1.94636e-33	6.3185e-49	3.11715e-33	6.3185e-49
P	18	I	2.69926e-39	2.34059e-41	2.34059e-41	8.23667e-47	7.50773e-36	8.23667e-47
P	18	L	1.10845e-42	7.53429e-33	1.10845e-42	3.7795e-44	8.77667e-29	3.7795e-44
P	18	R	1.5997e-28	4.15986e-48	4.15986e-48	3.33127e-36	9.13834e-43	9.13834e-43
P	18	C	4.67509e-19	3.0833e-24	3.0833e-24	3.83141e-29	4.70969e-35	4.70969e-35
P	18	G	3.33934e-35	8.77757e-34	3.33934e-35	1.0569e-28	5.51604e-33	5.51604e-33
P	18	M	2.35936e-22	1.59331e-17	2.35936e-22	3.99508e-28	1.50331e-16	3.99508e-28
P	18	Q	4.13656e-23	4.34584e-16	4.13656e-23	9.92284e-12	2.611e-23	2.611e-23
P	18	V	1.78903e-13	9.99211e-33	9.99211e-33	8.35693e-23	2.56735e-20	8.35693e-23
P	18	T	3.9955e-08	3.24784e-13	3.24784e-13	4.01647e-16	0.00358523	4.01647e-16
P	18	S	1.68779e-29	4.91795e-19	1.68779e-29	9.30531e-15	4.20737e-16	4.20737e-16
P	18	A	9.40484e-10	3.50547e-15	3.50547e-15	6.68978e-10	9.00126e-10	6.68978e-10
K	19	Q	2.47187e-24	8.04087e-12	2.47187e-24	2.35824e-17	2.17133e-18	2.17133e-18
K	19	T	3.07067e-12	4.6369e-10	3.07067e-12	3.69121e-11	1.7114e-15	1.7114e-15
K	19	D	3.41188e-12	5.2391e-11	3.41188e-12	4.81815e-08	5.82146e-13	5.82146e-13
K	19	V	4.2718e-12	4.46543e-12	4.2718e-12	1.56877e-10	5.32072e-12	5.32072e-12
K	19	C	7.13802e-05	1.31472e-08	1.31472e-08	1.22817e-05	4.40005e-11	4.40005e-11
K	19	I	1.51651e-13	1.71749e-12	1.51651e-13	4.47041e-11	2.33773e-08	4.47041e-11
K	19	A	1.90787e-19	8.19465e-22	8.19465e-22	1.24204e-08	9.97126e-11	9.97126e-11
K	19	R	1.03555e-21	1.67752e-12	1.03555e-21	0.000353568	1.51844e-10	1.51844e-10
K	19	G	1.00963e-14	3.58717e-11	1.00963e-14	1.7043e-05	3.21741e-10	3.21741e-10
K	19	H	1.62166e-12	1.27074e-05	1.62166e-12	4.99756e-10	2.69541e-08	4.99756e-10
K	19	E	4.66422e-11	4.69061e-14	4.69061e-14	0.000189009	1.59883e-09	1.59883e-09
K	19	Y	1.74381e-05	1.34665e-06	1.34665e-06	7.15438e-09	1.78779e-07	7.15438e-09
K	19	M	1.9813e-12	6.51223e-10	1.9813e-12	7.90251e-09	3.09144e-06	7.90251e-09
K	19	N	2.61788e-08	8.28654e-09	8.28654e-09	6.94847e-08	5.89629e-07	6.94847e-08
K	19	P	7.06492e-10	0.000151064	7.06492e-10	1.45346e-05	7.39544e-07	7.39544e-07
K	19	L	2.14707e-13	2.28571e-13	2.14707e-13	2.7252e-06	1.02757e-06	1.02757e-06
K	19	W	1.09305e-05	0.00307321	1.09305e-05	0.000175648	1.97348e-06	1.97348e-06
K	19	F	0.000162392	2.70523e-06	2.70523e-06	0.184322	3.2524e-05	3.2524e-05
K	19	S	3.2785e-14	1.77291e-07	3.2785e-14	0.000101337	6.19519e-05	6.19519e-05
T	20	P	3.84845e-12	7.56353e-13	7.56353e-13	5.04673e-09	7.9498e-14	7.9498e-14
T	20	I	0.000207293	0.402523	0.000207293	0.000191909	4.61906e-06	4.61906e-06
T	20	Q	0.000182513	0.248595	0.000182513	2.88811e-05	0.00220861	2.88811e-05
T	20	D	0.00443624	0.000763316	0.000763316	4.82484e-05	7.15737e-05	4.82484e-05
T	20	S	1.27317e-16	1.80533e-08	1.27317e-16	0.000140692	0.00026232	0.000140692
T	20	N	0.152218	0.33579	0.152218	0.0496361	0.000155594	0.000155594
T	20	F	0.337549	0.356774	0.337549	0.63505	0.00111077	0.00111077
T	20	E	8.22332e-05	0.00346709	8.22332e-05	0.00461328	0.00119009	0.00119009
T	20	A	0.261801	0.0131715	0.0131715	0.00202635	0.0768401	0.00202635
T	20	V	0.0524097	0.272758	0.0524097	0.762213	0.00502303	0.00502303
T	20	W	0.000116509	2.781e-05	2.781e-05	0.0122148	0.0565875	0.0122148
T	20	Y	0.764022	0.445467	0.445467	0.729108	0.0333574	0.0333574
T	20	C	0.226746	0.0157937	0.0157937	0.285475	0.0376654	0.0376654
T	20	H	0.28734	4.30172e-06	4.30172e-06	0.088368	0.841806	0.088368
T	20	K	0.085516	0.0137288	0.0137288	0.147354	0.450796	0.147354
T	20	M	0.291375	0.273405	0.273405	0.212065	0.352215	0.212065
T	20	G	0.158519	0.00912301	0.00912301	0.508191	0.279068	0.279068
T	20	R	0.00943783	0.000337813	0.000337813	0.408775	0.500933	0.408775
T	20	L	0.103856	0.187298	0.103856	0.766906	0.479099	0.479099
A	21	P	4.38341e-29	3.27904e-20	4.38341e-29	1.03516e-12	2.85378e-19	2.85378e-19
A	21	D	2.02301e-07	1.05514e-08	1.05514e-08	2.55134e-06	1.20495e-16	1.20495e-16
A	21	L	3.4096e-12	0.00361174	3.4096e-12	4.68893e-07	1.88492e-15	1.88492e-15
A	21	Q	8.77129e-16	2.51706e-12	8.77129e-16	2.22172e-11	2.34864e-11	2.22172e-11
A	21	I	2.74004e-05	5.97766e-05	2.74004e-05	1.7616e-08	1.15999e-09	1.15999e-09
A	21	V	2.83853e-05	0.00109136	2.83853e-05	1.08291e-05	1.41571e-09	1.41571e-09
A	21	C	0.00206737	5.16511e-06	5.16511e-06	4.12702e-07	4.17545e-09	4.17545e-09
A	21	S	1.88357e-13	1.33871e-07	1.88357e-13	2.22424e-07	1.324e-08	1.324e-08
A	21	E	7.59777e-09	3.82369e-10	3.82369e-10	4.25892e-08	1.05759e-05	4.25892e-08
A	21	R	6.18891e-14	3.13163e-13	6.18891e-14	0.000152102	1.05251e-07	1.05251e-07
A	21	K	4.37073e-11	9.86795e-12	9.86795e-12	0.000224762	2.92735e-07	2.92735e-07
A	21	G	5.71266e-06	7.35381e-08	7.35381e-08	0.000198586	9.15505e-07	9.15505e-07
A	21	H	0.10926	0.0491007	0.0491007	0.000278426	1.3931e-06	1.3931e-06
A	21	N	1.21752e-15	2.24965e-05	1.21752e-15	1.97742e-06	2.33777e-05	1.97742e-06
A	21	T	3.76077e-09	2.10603e-05	3.76077e-09	3.97004e-05	4.65387e-05	3.97004e-05
A	21	M	1.4895e-17	4.3268e-08	1.4895e-17	0.00363985	0.00911765	0.00363985
A	21	Y	0.752758	0.568356	0.568356	0.38561	0.025449	0.025449
A	21	F	0.363909	0.0152517	0.0152517	0.0716652	0.183251	0.0716652
A	21	W	0.063414	0.688365	0.063414	0.783807	0.568138	0.568138
C	22	Y	1.36667e-36	8.81375e-32	1.36667e-36	2.27378e-118	8.85977e-64	2.27378e-118
C	22	I	1.05219e-23	4.5114e-47	4.5114e-47	1.68764e-110	2.74827e-85	1.68764e-110
C	22	T	4.43064e-21	1.45373e-29	1.45373e-29	5.54761e-57	2.94757e-99	2.94757e-99
C	22	S	1.13224e-58	7.98909e-45	1.13224e-58	7.18286e-49	4.41733e-99	4.41733e-99
C	22	W	2.69175e-31	3.03967e-32	3.03967e-32	1.86506e-96	1.38284e-72	1.86506e-96
C	22	Q	4.84043e-23	6.16775e-32	6.16775e-32	5.08021e-90	1.08175e-59	5.08021e-90
C	22	F	7.72281e-29	2.50631e-33	2.50631e-33	4.37617e-81	2.7019e-57	4.37617e-81
C	22	K	1.36424e-34	5.0763e-36	5.0763e-36	2.187e-77	5.71813e-64	2.187e-77
C	22	V	1.1078e-33	6.72242e-33	1.1078e-33	1.08161e-72	2.70277e-76	2.70277e-76
C	22	A	3.23763e-30	2.49253e-56	2.49253e-56	1.08617e-74	1.88555e-52	1.08617e-74
C	22	R	1.50167e-29	7.30764e-48	7.30764e-48	3.74863e-72	8.06074e-52	3.74863e-72
C	22	G	9.44999e-20	8.14368e-40	8.14368e-40	2.1541e-63	1.61248e-55	2.1541e-63
C	22	M	5.9685e-37	3.05827e-43	3.05827e-43	6.76304e-52	4.12619e-60	4.12619e-60
C	22	L	1.44021e-44	9.70132e-40	1.44021e-44	7.27293e-58	1.60719e-57	7.27293e-58
C	22	E	2.0648e-30	4.17672e-30	2.0648e-30	1.30955e-57	4.18215e-43	1.30955e-57
C	22	D	1.76591e-35	5.44783e-41	5.44783e-41	1.01608e-37	2.11998e-56	2.11998e-56
C	22	P	3.63652e-22	3.24394e-23	3.24394e-23	3.10976e-47	1.19698e-49	1.19698e-49
C	22	N	4.04943e-16	3.5467e-49	3.5467e-49	2.34605e-49	4.69625e-44	2.34605e-49
C	22	H	1.25633e-16	1.11725e-15	1.25633e-16	2.43754e-14	1.15652e-17	1.15652e-17
T	23	W	1.00504e-25	1.38008e-25	1.00504e-25	3.40202e-30	1.2448e-07	3.40202e-30
T	23	F	6.87499e-18	3.22718e-22	3.22718e-22	6.17718e-22	4.4153e-20	6.17718e-22
T	23	Y	4.77837e-14	5.98211e-16	5.98211e-16	6.59633e-16	1.46352e-12	6.59633e-16
T	23	N	4.99761e-12	3.14032e-08	4.99761e-12	8.11511e-06	9.7417e-12	9.7417e-12
T	23	S	5.14837e-24	6.8953e-21	5.14837e-24	6.34221e-10	2.88748e-11	2.88748e-11
T	23	H	6.34338e-14	7.78052e-13	6.34338e-14	0.000120425	3.01554e-10	3.01554e-10
T	23	C	0.0233069	0.512221	0.0233069	0.0132162	2.62031e-08	2.62031e-08
T	23	G	2.03779e-07	0.000177994	2.03779e-07	0.00238687	0.000448336	0.000448336
T	23	K	0.000425531	0.140088	0.000425531	0.0831932	0.00510018	0.00510018
T	23	P	0.568712	0.792313	0.568712	0.105346	0.00534817	0.00534817
T	23	R	0.150917	0.3765	0.150917	0.207962	0.00551358	0.00551358
T	23	I	3.31646e-08	2.77915e-07	3.31646e-08	0.0104297	0.0480847	0.0104297
T	23	V	4.09198e-08	1.95902e-07	4.09198e-08	0.207119	0.0469613	0.0469613
T	23	M	9.57745e-05	4.81772e-09	4.81772e-09	0.154222	0.0523132	0.0523132
T	23	Q	0.261219	0.00068573	0.00068573	0.0890154	0.62337	0.0890154
T	23	E	9.02112e-07	8.02092e-08	8.02092e-08	0.166121	0.476887	0.166121
T	23	D	7.95114e-06	3.42938e-05	7.95114e-06	0.283156	0.220984	0.220984
T	23	L	0.0755367	1.40972e-07	1.40972e-07	0.692022	0.58697	0.58697
T	23	A	0.683294	0.000141614	0.000141614	0.940289	0.723313	0.723313
N	24	S	2.37502e-25	2.16441e-11	2.37502e-25	4.06984e-20	2.09492e-10	4.06984e-20
N	24	K	2.32812e-20	7.47778e-16	2.32812e-20	3.91029e-14	1.23629e-06	3.91029e-14
N	24	R	2.03654e-26	5.85556e-13	2.03654e-26	2.721e-12	9.78847e-10	2.721e-12
N	24	T	1.64648e-25	6.82666e-14	1.64648e-25	9.15603e-11	5.05171e-11	5.05171e-11
N	24	Q	1.51108e-06	0.000184969	1.51108e-06	1.27718e-10	1.28497e-10	1.27718e-10
N	24	A	2.44089e-16	6.98155e-12	2.44089e-16	3.99122e-09	1.23059e-06	3.99122e-09
N	24	W	4.22228e-22	1.90776e-22	1.90776e-22	9.08928e-06	9.47656e-09	9.47656e-09
N	24	H	0.00129172	0.000171212	0.000171212	1.71377e-08	1.61411e-07	1.71377e-08
N	24	G	0.000209172	0.0224591	0.000209172	9.02096e-06	3.20238e-07	3.20238e-07
N	24	P	1.61517e-07	2.24541e-08	2.24541e-08	4.62422e-07	1.59144e-06	4.62422e-07
N	24	L	1.59259e-06	9.03224e-08	9.03224e-08	0.0712782	4.50728e-06	4.50728e-06
N	24	M	0.202683	0.0553218	0.0553218	4.59214e-06	0.00866201	4.59214e-06
N	24	V	0.173492	0.671056	0.173492	0.0607842	0.000110868	0.000110868
N	24	C	0.868272	0.558952	0.558952	0.00515072	0.0134063	0.00515072
N	24	I	4.38824e-05	1.07974e-07	1.07974e-07	0.500136	0.0156802	0.0156802
N	24	D	1.9154e-10	4.08971e-12	4.08971e-12	0.0243807	0.530324	0.0243807
N	24	E	0.000726899	1.07749e-05	1.07749e-05	0.139093	0.0477	0.0477
N	24	Y	0.00317351	7.41611e-14	7.41611e-14	0.0796109	0.158013	0.0796109
N	24	F	0.000149993	7.27372e-06	7.27372e-06	0.843737	0.409763	0.409763
C	25	L	1.39868e-31	1.93887e-47	1.93887e-47	1.22069e-124	1.74205e-60	1.22069e-124
C	25	S	7.26406e-41	6.35302e-43	6.35302e-43	3.55444e-118	1.0626e-101	3.55444e-118
C	25	G	3.23327e-59	4.14266e-30	3.23327e-59	2.2596e-114	2.01908e-67	2.2596e-114
C	25	N	7.3527e-42	1.56768e-34	7.3527e-42	9.25495e-113	2.70759e-61	9.25495e-113
C	25	V	8.25191e-40	9.35984e-36	8.25191e-40	1.06797e-74	5.27644e-104	5.27644e-104
C	25	E	1.42484e-32	2.02816e-54	2.02816e-54	7.44193e-104	2.11182e-72	7.44193e-104
C	25	I	2.47611e-28	1.18621e-39	1.18621e-39	1.29373e-41	1.70488e-101	1.70488e-101
C	25	M	3.3327e-19	6.36448e-33	6.36448e-33	1.73665e-100	4.01435e-86	1.73665e-100
C	25	F	4.81713e-22	6.01429e-45	6.01429e-45	1.35723e-97	2.59301e-42	1.35723e-97
C	25	A	8.74416e-31	1.66054e-33	1.66054e-33	9.27071e-56	7.53748e-85	7.53748e-85
C	25	R	7.12786e-31	5.57174e-36	5.57174e-36	4.73898e-83	5.82689e-59	4.73898e-83
C	25	D	2.62377e-16	3.25526e-37	3.25526e-37	1.08869e-82	1.63827e-49	1.08869e-82
C	25	Y	6.15047e-30	3.38565e-53	3.38565e-53	1.53066e-71	4.71144e-80	4.71144e-80
C	25	K	1.95075e-23	5.65768e-24	5.65768e-24	1.22289e-79	1.04044e-48	1.22289e-79
C	25	P	1.41461e-28	9.66777e-45	9.66777e-45	2.19197e-78	1.93817e-66	2.19197e-78
C	25	W	7.97276e-34	1.12821e-28	7.97276e-34	4.73841e-68	3.34326e-65	4.73841e-68
C	25	Q	1.51315e-28	1.82487e-43	1.82487e-43	8.84439e-68	1.80296e-61	8.84439e-68
C	25	T	2.35807e-37	1.12656e-45	1.12656e-45	2.38909e-51	6.87022e-53	6.87022e-53
C	25	H	2.42142e-29	1.4513e-29	1.4513e-29	9.57791e-52	3.54765e-36	9.57791e-52
Y	26	D	3.0513e-40	2.33237e-46	2.33237e-46	1.9679e-63	1.00736e-40	1.9679e-63
Y	26	E	1.05042e-25	4.46714e-40	4.46714e-40	4.62765e-52	1.59831e-35	4.62765e-52
Y	26	I	2.02051e-35	4.1966e-36	4.1966e-36	1.78951e-16	1.97623e-32	1.97623e-32
Y	26	A	1.4356e-21	3.95669e-24	3.95669e-24	6.90673e-17	4.47743e-29	4.47743e-29
Y	26	G	4.58859e-18	4.49119e-31	4.49119e-31	2.30732e-20	8.34384e-27	8.34384e-27
Y	26	T	1.82955e-18	1.27955e-18	1.27955e-18	5.91776e-17	7.06418e-25	7.06418e-25
Y	26	F	4.59608e-18	1.11181e-23	1.11181e-23	1.11433e-18	1.31179e-12	1.11433e-18
Y	26	W	3.02687e-32	4.51569e-29	3.02687e-32	4.25135e-10	2.8075e-16	2.8075e-16
Y	26	S	1.45222e-31	1.43642e-40	1.43642e-40	1.8027e-14	3.30039e-07	1.8027e-14
Y	26	P	1.22921e-23	3.30432e-22	1.22921e-23	1.84354e-14	1.47322e-08	1.84354e-14
Y	26	K	6.00937e-33	9.22993e-28	6.00937e-33	4.68516e-10	1.41783e-08	4.68516e-10
Y	26	N	4.60101e-26	4.51953e-40	4.51953e-40	1.80207e-09	6.00446e-08	1.80207e-09
Y	26	V	4.34383e-23	2.12215e-33	2.12215e-33	1.38084e-08	2.67183e-05	1.38084e-08
Y	26	R	4.40818e-13	2.17014e-15	2.17014e-15	0.000280099	3.88398e-06	3.88398e-06
Y	26	M	0.159708	0.255068	0.159708	0.0236329	2.91037e-05	2.91037e-05
Y	26	Q	6.47329e-17	5.18956e-21	5.18956e-21	0.0359409	0.000684458	0.000684458
Y	26	H	0.160773	0.493736	0.160773	0.0715412	0.00111179	0.00111179
Y	26	C	3.41733e-10	2.1883e-12	2.1883e-12	0.0104702	0.0110037	0.0104702
Y	26	L	3.90016e-10	7.29071e-19	7.29071e-19	0.0245938	0.958869	0.0245938
C	27	E	6.36214e-26	2.09702e-36	2.09702e-36	9.50809e-107	1.88147e-49	9.50809e-107
C	27	P	3.07129e-36	2.21337e-34	3.07129e-36	1.54693e-95	1.12386e-52	1.54693e-95
C	27	R	1.19588e-39	1.68493e-30	1.19588e-39	6.33685e-75	4.17016e-93	4.17016e-93
C	27	A	1.41916e-31	1.47096e-24	1.41916e-31	5.45906e-91	1.06664e-61	5.45906e-91
C	27	V	1.08103e-38	1.70914e-26	1.08103e-38	4.67294e-71	3.39916e-76	3.39916e-76
C	27	W	2.98407e-30	1.39903e-36	1.39903e-36	2.55959e-75	1.45122e-50	2.55959e-75
C	27	L	2.62482e-40	2.27313e-34	2.62482e-40	1.14304e-73	7.43752e-73	1.14304e-73
C	27	D	3.75033e-23	2.39277e-43	2.39277e-43	1.03954e-50	4.61034e-71	4.61034e-71
C	27	I	1.96427e-23	4.3873e-34	4.3873e-34	1.48932e-66	3.05635e-68	3.05635e-68
C	27	T	8.44068e-40	3.83162e-30	8.44068e-40	2.22941e-65	1.94225e-40	2.22941e-65
C	27	Y	3.83931e-27	2.75839e-45	2.75839e-45	3.08767e-62	7.03392e-59	3.08767e-62
C	27	F	1.04232e-18	6.79852e-34	6.79852e-34	4.79235e-57	2.26105e-41	4.79235e-57
C	27	G	1.41511e-16	2.24539e-33	2.24539e-33	2.99218e-56	1.30267e-52	2.99218e-56
C	27	N	5.25342e-27	7.25211e-24	5.25342e-27	2.13854e-33	4.28797e-52	4.28797e-52
C	27	K	6.92883e-33	7.26673e-30	6.92883e-33	1.04222e-47	1.08701e-41	1.04222e-47
C	27	H	2.1276e-22	8.55283e-23	8.55283e-23	3.65684e-44	2.58367e-44	2.58367e-44
C	27	Q	1.72482e-22	1.84232e-21	1.72482e-22	3.16826e-36	6.2543e-40	6.2543e-40
C	27	S	1.96906e-21	3.57086e-21	1.96906e-21	1.30517e-39	1.36365e-32	1.30517e-39
C	27	M	1.32669e-17	1.99114e-54	1.99114e-54	8.0679e-34	3.03139e-36	3.03139e-36
K	28	D	1.13271e-36	7.52446e-57	7.52446e-57	6.73116e-87	2.38408e-50	6.73116e-87
K	28	E	9.98604e-41	5.91164e-45	5.91164e-45	1.84077e-24	2.32355e-21	1.84077e-24
K	28	N	8.02498e-34	8.60691e-25	8.02498e-34	3.52548e-17	1.12101e-18	1.12101e-18
K	28	G	2.25052e-19	5.14853e-16	2.25052e-19	4.97144e-12	3.12807e-13	3.12807e-13
K	28	T	5.06815e-13	3.94248e-17	3.94248e-17	3.13828e-10	8.42685e-12	8.42685e-12
K	28	L	1.59831e-21	6.88537e-21	1.59831e-21	1.68941e-09	9.6851e-12	9.6851e-12
K	28	Q	2.61805e-18	1.37416e-24	1.37416e-24	0.000159391	1.0562e-11	1.0562e-11
K	28	F	4.03123e-15	1.19834e-16	1.19834e-16	9.09022e-07	8.67281e-08	8.67281e-08
K	28	M	2.85187e-08	7.15866e-24	7.15866e-24	3.85076e-07	2.30984e-06	3.85076e-07
K	28	V	0.518294	0.0552663	0.0552663	6.40224e-05	7.46357e-07	7.46357e-07
K	28	R	0.0434651	0.458361	0.0434651	5.30505e-06	4.54832e-06	4.54832e-06
K	28	Y	1.04635e-10	2.07435e-11	2.07435e-11	0.00443569	1.91896e-05	1.91896e-05
K	28	W	2.0256e-13	2.46306e-31	2.46306e-31	0.0678111	0.000637846	0.000637846
K	28	S	9.84414e-14	2.16005e-08	9.84414e-14	0.191221	0.0474418	0.0474418
K	28	H	0.00772487	5.16252e-12	5.16252e-12	0.325915	0.150378	0.150378
K	28	I	1.08811e-08	1.95609e-20	1.95609e-20	0.179722	0.231974	0.179722
K	28	P	8.35648e-12	5.78425e-09	8.35648e-12	0.977163	0.46044	0.46044
K	28	C	3.9754e-06	3.32928e-09	3.32928e-09	0.589675	0.554778	0.554778
K	28	A	4.38574e-07	2.57347e-08	2.57347e-08	0.781403	0.574599	0.574599
K	29	S	3.12396e-14	1.74368e-12	3.12396e-14	9.83103e-20	4.0686e-09	9.83103e-20
K	29	A	4.64473e-23	3.64189e-15	4.64473e-23	0.000610708	1.33141e-19	1.33141e-19
K	29	F	1.07142e-16	5.10999e-18	5.10999e-18	4.631e-11	4.78582e-18	4.78582e-18
K	29	I	5.27587e-22	6.0865e-16	5.27587e-22	1.40142e-15	2.4286e-08	1.40142e-15
K	29	G	2.63058e-21	1.21644e-12	2.63058e-21	2.9851e-12	9.75547e-14	9.75547e-14
K	29	C	1.01107e-18	2.57063e-07	1.01107e-18	1.27237e-12	1.31974e-08	1.27237e-12
K	29	W	4.30978e-10	8.67308e-10	4.30978e-10	2.20636e-07	3.54326e-12	3.54326e-12
K	29	R	3.87896e-15	1.70299e-12	3.87896e-15	4.3293e-12	4.25477e-09	4.3293e-12
K	29	P	1.84016e-06	1.16245e-08	1.16245e-08	1.24122e-11	4.07095e-06	1.24122e-11
K	29	Y	6.07201e-13	1.98719e-13	1.98719e-13	3.10915e-11	1.48719e-09	3.10915e-11
K	29	H	0.000128978	0.000228687	0.000128978	8.67792e-07	2.18622e-09	2.18622e-09
K	29	E	4.15502e-09	0.000142738	4.15502e-09	1.25203e-06	2.58529e-09	2.58529e-09
K	29	T	0.00833919	0.0200001	0.00833919	3.99494e-06	4.16279e-09	4.16279e-09
K	29	L	0.000136947	9.49252e-05	9.49252e-05	3.9469e-08	6.51031e-06	3.9469e-08
K	29	M	2.30051e-12	1.11822e-10	2.30051e-12	8.91166e-08	5.4998e-08	5.4998e-08
K	29	V	7.29836e-16	3.05628e-16	3.05628e-16	4.5661e-06	2.05534e-07	2.05534e-07
K	29	Q	2.5526e-05	4.13996e-07	4.13996e-07	0.00619719	4.74e-07	4.74e-07
K	29	N	0.11305	0.00647608	0.00647608	0.000297124	1.98817e-05	1.98817e-05
K	29	D	8.63008e-06	4.94105e-09	4.94105e-09	0.127716	0.351246	0.127716
C	30	S	3.0961e-23	2.97448e-43	2.97448e-43	2.33855e-99	1.73699e-48	2.33855e-99
C	30	Y	5.21037e-29	1.10232e-66	1.10232e-66	4.24523e-58	1.61086e-96	1.61086e-96
C	30	M	1.7252e-24	1.64287e-32	1.64287e-32	1.10337e-86	1.44643e-33	1.10337e-86
C	30	L	5.25094e-27	7.64125e-23	5.25094e-27	1.69526e-85	6.00114e-58	1.69526e-85
C	30	N	1.20072e-13	4.56294e-27	4.56294e-27	1.43335e-78	3.23471e-31	1.43335e-78
C	30	G	3.15675e-41	7.18845e-33	3.15675e-41	3.83724e-69	5.30448e-49	3.83724e-69
C	30	T	1.36409e-23	1.88317e-26	1.88317e-26	5.82896e-63	1.09799e-43	5.82896e-63
C	30	P	9.82251e-21	4.21454e-41	4.21454e-41	4.38492e-62	1.51917e-61	4.38492e-62
C	30	D	3.34868e-36	7.31337e-28	3.34868e-36	2.65582e-61	1.48225e-38	2.65582e-61
C	30	F	2.19045e-23	1.77126e-37	1.77126e-37	6.89523e-56	6.18188e-58	6.18188e-58
C	30	E	3.05266e-29	1.22684e-25	3.05266e-29	2.5576e-56	8.81874e-47	2.5576e-56
C	30	K	1.15394e-19	6.46749e-35	6.46749e-35	9.45847e-54	4.25073e-36	9.45847e-54
C	30	V	9.45433e-34	5.02609e-34	5.02609e-34	1.47873e-52	7.12204e-49	1.47873e-52
C	30	W	1.21094e-21	1.67128e-23	1.67128e-23	4.52563e-52	8.32418e-44	4.52563e-52
C	30	A	1.20906e-29	4.28329e-31	4.28329e-31	6.51616e-50	5.73398e-40	6.51616e-50
C	30	R	5.03031e-29	1.23767e-28	5.03031e-29	9.04332e-49	1.47938e-32	9.04332e-49
C	30	I	6.64839e-19	6.58536e-35	6.58536e-35	3.02855e-41	4.61746e-36	3.02855e-41
C	30	Q	3.65415e-17	5.68527e-27	5.68527e-27	1.24017e-38	9.97152e-39	9.97152e-39
C	30	H	9.9494e-19	1.59698e-30	1.59698e-30	4.83859e-36	1.68143e-26	4.83859e-36
C	31	Y	5.81788e-22	4.64444e-35	4.64444e-35	7.30507e-89	3.15731e-41	7.30507e-89
C	31	P	2.9193e-32	3.95119e-40	3.95119e-40	2.7289e-60	1.5243e-83	1.5243e-83
C	31	R	1.85122e-39	4.56634e-43	4.56634e-43	3.84755e-46	4.59305e-82	4.59305e-82
C	31	K	6.67448e-31	2.48267e-37	2.48267e-37	1.7572e-34	1.20944e-78	1.20944e-78
C	31	H	5.37663e-28	1.71563e-25	5.37663e-28	1.04943e-51	4.2148e-50	1.04943e-51
C	31	D	1.12647e-18	7.03914e-35	7.03914e-35	1.56656e-43	1.88097e-49	1.88097e-49
C	31	F	1.75074e-27	2.50813e-21	1.75074e-27	6.74948e-25	2.76059e-43	2.76059e-43
C	31	E	2.02072e-18	5.93943e-36	5.93943e-36	4.19186e-40	5.41946e-35	4.19186e-40
C	31	W	1.0144e-21	1.69534e-42	1.69534e-42	8.32718e-40	2.00015e-29	8.32718e-40
C	31	L	2.44416e-33	2.82816e-25	2.44416e-33	8.24393e-22	4.42852e-29	4.42852e-29
C	31	Q	2.02524e-20	5.74179e-25	5.74179e-25	2.49247e-28	1.70709e-20	2.49247e-28
C	31	N	6.53753e-18	5.53278e-20	5.53278e-20	3.93374e-22	8.68854e-23	8.68854e-23
C	31	G	2.31709e-14	2.51855e-17	2.51855e-17	6.20444e-12	7.93026e-13	7.93026e-13
C	31	I	4.18232e-23	2.33563e-16	4.18232e-23	2.88076e-11	0.000264948	2.88076e-11
C	31	A	2.27633e-18	1.43415e-08	2.27633e-18	2.79346e-10	1.64585e-09	2.79346e-10
C	31	S	2.03828e-08	4.38445e-06	2.03828e-08	0.000116019	5.06111e-09	5.06111e-09
C	31	M	2.28647e-11	2.34051e-20	2.34051e-20	3.81391e-05	6.24989e-06	6.24989e-06
C	31	T	1.76672e-09	9.86035e-09	1.76672e-09	0.00242645	0.000144034	0.000144034
C	31	V	1.19659e-06	3.58707e-08	3.58707e-08	0.249731	0.326912	0.249731
F	32	R	8.8569e-24	1.86287e-25	1.86287e-25	7.15422e-59	4.90334e-90	4.90334e-90
F	32	D	2.8109e-31	1.01169e-31	1.01169e-31	2.27011e-59	3.92911e-47	2.27011e-59
F	32	K	1.83135e-26	7.09715e-26	1.83135e-26	1.42942e-55	1.76415e-43	1.42942e-55
F	32	E	1.10952e-18	3.05324e-22	3.05324e-22	6.09411e-55	7.68058e-44	6.09411e-55
F	32	S	1.5819e-10	9.66981e-20	9.66981e-20	2.05292e-48	7.23776e-46	2.05292e-48
F	32	I	6.37654e-20	2.2377e-14	6.37654e-20	4.61784e-29	1.03104e-39	1.03104e-39
F	32	G	6.20889e-19	1.06584e-38	1.06584e-38	4.34571e-39	2.36229e-34	4.34571e-39
F	32	N	4.94273e-21	1.45881e-20	4.94273e-21	5.83572e-37	4.9566e-39	4.9566e-39
F	32	Q	2.1262e-26	9.85265e-21	2.1262e-26	2.40301e-38	2.25393e-33	2.40301e-38
F	32	H	1.17174e-09	4.84966e-18	4.84966e-18	4.65298e-37	3.23481e-18	4.65298e-37
F	32	T	2.59984e-21	3.18281e-39	3.18281e-39	3.33334e-33	7.72561e-31	3.33334e-33
F	32	P	4.56417e-12	2.25046e-20	2.25046e-20	1.13641e-32	6.2864e-30	1.13641e-32
F	32	A	4.43767e-18	1.13367e-20	1.13367e-20	2.15724e-22	1.96195e-32	1.96195e-32
F	32	Y	2.52086e-18	1.73807e-13	2.52086e-18	3.12556e-17	1.67083e-11	3.12556e-17
F	32	C	8.38627e-16	2.16149e-27	2.16149e-27	2.31753e-12	5.64995e-10	2.31753e-12
F	32	V	2.30286e-16	1.36343e-16	1.36343e-16	2.53762e-09	3.16718e-09	2.53762e-09
F	32	L	0.070644	0.179419	0.070644	0.0348843	0.000114953	0.000114953
F	32	W	1.18443e-14	3.61534e-05	1.18443e-14	0.000889506	0.000139229	0.000139229
F	32	M	0.196256	2.14769e-07	2.14769e-07	0.511533	0.696782	0.511533
H	33	W	8.62705e-20	9.3522e-28	9.3522e-28	4.09473e-116	2.15772e-97	4.09473e-116
H	33	N	6.41035e-37	1.98759e-27	6.41035e-37	7.00125e-104	3.18173e-73	7.00125e-104
H	33	L	3.62081e-35	2.21867e-42	2.21867e-42	5.80009e-98	1.55908e-63	5.80009e-98
H	33	M	4.51939e-39	9.49072e-44	9.49072e-44	2.26492e-84	1.452e-97	1.452e-97
H	33	E	7.50624e-31	4.04129e-29	7.50624e-31	3.99347e-53	2.34793e-84	2.34793e-84
H	33	Q	5.90445e-25	6.28062e-29	6.28062e-29	3.84797e-76	2.14703e-70	3.84797e-76
H	33	G	1.7241e-26	6.74884e-30	6.74884e-30	2.85513e-75	1.25432e-46	2.85513e-75
H	33	D	8.09619e-36	1.81644e-32	8.09619e-36	9.59623e-72	1.01272e-72	1.01272e-72
H	33	S	1.93007e-18	1.92856e-43	1.92856e-43	3.78263e-48	1.25842e-70	1.25842e-70
H	33	C	3.5058e-18	1.86145e-21	1.86145e-21	2.14054e-69	2.76307e-46	2.14054e-69
H	33	R	1.62205e-31	1.30906e-38	1.30906e-38	5.56825e-65	1.0905e-65	1.0905e-65
H	33	V	5.73855e-33	1.37452e-30	5.73855e-33	2.34946e-63	6.2568e-57	2.34946e-63
H	33	K	6.99384e-22	2.3749e-24	2.3749e-24	9.19289e-61	1.17272e-52	9.19289e-61
H	33	P	1.16965e-24	1.76462e-16	1.16965e-24	1.70421e-37	2.19845e-59	2.19845e-59
H	33	Y	3.00219e-14	6.77485e-23	6.77485e-23	1.96998e-58	3.38131e-38	1.96998e-58
H	33	T	4.63556e-23	2.47564e-28	2.47564e-28	6.78363e-58	1.22548e-55	6.78363e-58
H	33	F	1.61112e-22	2.52215e-50	2.52215e-50	2.5173e-55	1.51919e-53	2.5173e-55
H	33	A	2.79446e-19	4.29415e-20	4.29415e-20	1.3791e-51	7.20076e-49	1.3791e-51
H	33	I	1.95532e-23	3.07093e-24	3.07093e-24	1.016e-31	3.02584e-44	3.02584e-44
C	34	V	1.94682e-19	2.58418e-24	2.58418e-24	1.06884e-113	3.80089e-79	1.06884e-113
C	34	S	1.1326e-28	1.02431e-32	1.02431e-32	1.45038e-105	7.82271e-69	1.45038e-105
C	34	Q	2.9828e-23	2.6459e-41	2.6459e-41	7.70094e-102	2.47487e-64	7.70094e-102
C	34	I	1.27507e-19	1.37978e-31	1.37978e-31	1.07121e-34	7.19516e-95	7.19516e-95
C	34	G	8.80415e-22	5.77697e-38	5.77697e-38	1.26022e-91	4.76976e-67	1.26022e-91
C	34	P	3.42109e-40	1.15806e-27	3.42109e-40	7.94887e-90	4.2071e-74	7.94887e-90
C	34	N	5.43242e-31	1.80096e-33	1.80096e-33	1.2083e-85	5.8526e-68	1.2083e-85
C	34	H	5.17337e-19	4.13776e-29	4.13776e-29	1.27026e-83	4.70848e-55	1.27026e-83
C	34	A	2.90998e-38	1.61199e-26	2.90998e-38	4.29738e-83	1.56501e-70	4.29738e-83
C	34	R	2.33231e-29	7.46333e-52	7.46333e-52	3.85373e-53	9.83603e-72	9.83603e-72
C	34	E	2.14296e-24	6.40741e-40	6.40741e-40	1.46611e-71	1.11288e-66	1.46611e-71
C	34	M	3.0006e-35	1.00581e-30	3.0006e-35	3.89322e-67	4.75172e-68	4.75172e-68
C	34	W	3.9768e-24	2.55214e-42	2.55214e-42	1.02609e-67	4.98977e-52	1.02609e-67
C	34	L	2.441e-24	1.53853e-47	1.53853e-47	6.88166e-59	9.31481e-54	6.88166e-59
C	34	F	7.88839e-20	1.38109e-33	1.38109e-33	2.0653e-58	1.97166e-56	2.0653e-58
C	34	T	3.91225e-21	3.32999e-37	3.32999e-37	1.65899e-54	7.58976e-55	7.58976e-55
C	34	D	2.65448e-22	3.55332e-40	3.55332e-40	1.70904e-32	3.87958e-52	3.87958e-52
C	34	Y	3.02194e-26	4.38254e-35	4.38254e-35	2.307e-37	1.88389e-48	1.88389e-48
C	34	K	2.86236e-19	4.34386e-41	4.34386e-41	4.94853e-47	6.36943e-27	4.94853e-47
Q	35	R	2.14239e-28	1.43088e-35	1.43088e-35	7.09718e-95	8.76515e-48	7.09718e-95
Q	35	W	2.34326e-25	1.00309e-53	1.00309e-53	1.9432e-55	2.54737e-93	2.54737e-93
Q	35	K	3.64831e-26	5.75948e-15	3.64831e-26	5.25425e-52	8.609e-56	8.609e-56
Q	35	D	6.73903e-39	3.21414e-22	6.73903e-39	2.11468e-51	7.23571e-33	2.11468e-51
Q	35	G	1.49447e-08	4.67894e-12	4.67894e-12	2.32937e-17	9.06075e-12	2.32937e-17
Q	35	H	1.15408e-10	2.26357e-08	1.15408e-10	1.01068e-14	2.33013e-12	1.01068e-14
Q	35	M	1.57291e-06	2.2785e-06	1.57291e-06	6.88744e-10	3.92471e-11	3.92471e-11
Q	35	Y	0.000121677	0.00736979	0.000121677	1.22952e-05	1.60294e-07	1.60294e-07
Q	35	T	0.0183455	0.0149936	0.0149936	0.0121428	4.86179e-06	4.86179e-06
Q	35	V	0.531088	0.89399	0.531088	1.9499e-05	0.000714957	1.9499e-05
Q	35	C	0.000513639	0.000754885	0.000513639	3.25401e-05	0.339713	3.25401e-05
Q	35	I	0.353468	0.114137	0.114137	0.00428417	0.000384053	0.000384053
Q	35	F	9.8821e-11	2.05871e-12	2.05871e-12	0.00321373	0.000894157	0.000894157
Q	35	L	5.35163e-06	4.02295e-14	4.02295e-14	0.141679	0.00251439	0.00251439
Q	35	P	0.228189	0.247868	0.228189	0.0141405	0.0415816	0.0141405
Q	35	N	0.0895872	0.00498585	0.00498585	0.0543899	0.452212	0.0543899
Q	35	A	1.42017e-07	1.04701e-07	1.04701e-07	0.111249	0.423358	0.111249
Q	35	S	0.00525502	5.1415e-07	5.1415e-07	0.355792	0.51503	0.355792
Q	35	E	0.00262336	0.0343088	0.00262336	0.692905	0.711748	0.692905
V	36	E	9.90814e-33	4.88464e-35	4.88464e-35	1.52148e-56	6.68149e-30	1.52148e-56
V	36	P	6.80421e-37	3.48938e-27	6.80421e-37	1.29059e-46	4.62728e-38	1.29059e-46
V	36	D	3.32783e-16	3.77946e-31	3.77946e-31	6.18567e-23	1.48021e-24	1.48021e-24
V	36	L	4.27987e-16	1.39967e-11	4.27987e-16	1.80799e-12	6.82391e-08	1.80799e-12
V	36	H	5.88979e-07	1.92427e-09	1.92427e-09	3.9302e-05	1.88e-09	1.88e-09
V	36	F	0.210142	0.79514	0.210142	8.42874e-06	0.00696557	8.42874e-06
V	36	C	6.53092e-05	0.000386039	6.53092e-05	1.79588e-05	5.69281e-05	1.79588e-05
V	36	K	3.77921e-07	0.000258496	3.77921e-07	0.00252219	3.57613e-05	3.57613e-05
V	36	T	0.178567	0.0215714	0.0215714	4.87854e-05	0.00382681	4.87854e-05
V	36	A	0.000454911	0.0281169	0.000454911	8.9698e-05	0.000345682	8.9698e-05
V	36	W	0.0783596	0.0821437	0.0783596	0.0001217	0.00139183	0.0001217
V	36	I	0.0269697	0.530891	0.0269697	0.000149506	0.0836905	0.000149506
V	36	M	0.0681655	0.509743	0.0681655	0.0177295	0.000595445	0.000595445
V	36	R	0.00138402	0.00398719	0.00138402	0.00823488	0.00122406	0.00122406
V	36	S	0.293671	0.218441	0.218441	0.00137273	0.125493	0.00137273
V	36	G	1.12161e-05	0.000134302	1.12161e-05	0.0054145	0.865188	0.0054145
V	36	Y	0.0719672	0.771598	0.0719672	0.229454	0.0206316	0.0206316
V	36	Q	0.461142	0.0217391	0.0217391	0.256682	0.179394	0.179394
V	36	N	0.273336	0.129457	0.129457	0.856299	0.210766	0.210766
C	37	H	1.59305e-18	4.47701e-38	4.47701e-38	1.77645e-48	2.31708e-92	2.31708e-92
C	37	F	1.71588e-24	4.22097e-24	1.71588e-24	7.0195e-88	3.72529e-57	7.0195e-88
C	37	D	9.20616e-20	2.1861e-19	9.20616e-20	1.61793e-78	5.47729e-29	1.61793e-78
C	37	P	2.028e-28	5.06717e-12	2.028e-28	4.2666e-78	7.26299e-37	4.2666e-78
C	37	G	1.36096e-15	5.06138e-19	5.06138e-19	1.4018e-70	2.15554e-34	1.4018e-70
C	37	V	4.79222e-21	6.58061e-15	4.79222e-21	1.66136e-70	2.89529e-50	1.66136e-70
C	37	R	1.86448e-29	7.77061e-37	7.77061e-37	1.35388e-39	1.25166e-65	1.25166e-65
C	37	L	2.91845e-18	3.84926e-21	3.84926e-21	8.91e-50	4.24269e-65	4.24269e-65
C	37	Q	7.3978e-18	3.09901e-31	3.09901e-31	2.75534e-53	4.32283e-56	4.32283e-56
C	37	Y	9.8771e-20	1.11885e-11	9.8771e-20	1.18674e-54	6.92662e-28	1.18674e-54
C	37	I	1.02094e-14	1.97824e-20	1.97824e-20	7.25583e-51	2.61747e-54	2.61747e-54
C	37	S	2.89124e-12	2.07857e-19	2.07857e-19	1.08801e-52	3.42747e-28	1.08801e-52
C	37	N	1.71954e-28	3.61959e-21	1.71954e-28	1.25467e-51	1.08117e-39	1.25467e-51
C	37	M	5.98687e-15	2.70966e-29	2.70966e-29	3.72171e-48	1.01261e-37	3.72171e-48
C	37	T	1.26723e-19	1.12792e-16	1.26723e-19	1.4767e-46	3.54678e-31	1.4767e-46
C	37	E	2.48688e-24	2.83522e-27	2.83522e-27	7.11801e-42	1.42653e-39	7.11801e-42
C	37	A	1.1803e-17	3.69238e-15	1.1803e-17	4.36497e-36	1.11382e-27	4.36497e-36
C	37	W	1.03374e-13	1.87187e-17	1.87187e-17	3.43664e-32	9.33801e-36	9.33801e-36
C	37	K	1.0008e-14	2.60054e-16	2.60054e-16	1.18928e-25	2.51217e-25	1.18928e-25
F	38	N	3.27696e-32	8.55942e-34	8.55942e-34	9.35804e-43	6.95537e-92	6.95537e-92
F	38	Q	1.18871e-14	4.39989e-17	4.39989e-17	1.48476e-31	2.17894e-76	2.17894e-76
F	38	P	2.54355e-20	9.29115e-35	9.29115e-35	1.81386e-72	2.54333e-55	1.81386e-72
F	38	I	2.66307e-26	1.127e-20	2.66307e-26	5.16939e-70	6.1175e-41	5.16939e-70
F	38	D	8.04853e-21	2.96581e-25	2.96581e-25	1.27207e-56	5.46601e-43	1.27207e-56
F	38	K	1.9914e-16	4.10207e-13	1.9914e-16	3.2463e-54	1.76967e-53	3.2463e-54
F	38	A	1.45748e-13	4.37294e-19	4.37294e-19	6.37052e-36	1.18516e-51	1.18516e-51
F	38	E	1.51413e-22	1.23639e-19	1.51413e-22	8.86941e-32	2.6867e-51	2.6867e-51
F	38	S	1.78588e-22	8.76303e-27	8.76303e-27	3.42591e-51	4.09657e-43	3.42591e-51
F	38	C	7.44998e-20	3.22355e-26	3.22355e-26	2.41279e-46	6.81678e-45	2.41279e-46
F	38	M	2.41465e-13	4.34979e-17	4.34979e-17	2.48239e-40	4.68767e-37	2.48239e-40
F	38	L	2.08331e-15	8.63647e-17	8.63647e-17	3.78551e-40	5.1862e-19	3.78551e-40
F	38	T	4.63691e-13	4.84713e-31	4.84713e-31	1.76336e-37	8.23385e-21	1.76336e-37
F	38	G	1.02121e-11	3.60765e-09	1.02121e-11	5.25351e-26	1.0162e-34	1.0162e-34
F	38	H	7.58217e-12	7.6916e-22	7.6916e-22	5.95668e-34	1.98886e-29	5.95668e-34
F	38	R	3.27117e-08	3.21017e-13	3.21017e-13	1.06312e-25	2.64864e-30	2.64864e-30
F	38	V	2.83634e-08	6.53348e-10	6.53348e-10	2.72948e-20	1.68731e-22	1.68731e-22
F	38	W	0.535255	0.0632855	0.0632855	0.4718	0.00319413	0.00319413
F	38	Y	0.000513955	0.000823618	0.000513955	0.00837433	0.950389	0.00837433
M	39	K	1.78261e-30	3.2035e-27	1.78261e-30	5.12892e-80	1.25795e-43	5.12892e-80
M	39	R	2.72538e-21	5.72824e-36	5.72824e-36	2.76941e-67	1.5634e-75	1.5634e-75
M	39	P	2.11988e-18	9.81321e-35	9.81321e-35	6.55684e-61	3.96551e-60	6.55684e-61
M	39	W	6.04112e-20	4.83242e-29	4.83242e-29	9.57699e-51	3.86624e-47	9.57699e-51
M	39	Y	1.58505e-24	9.55865e-31	9.55865e-31	1.65493e-31	8.84645e-20	1.65493e-31
M	39	I	1.97738e-15	3.78944e-21	3.78944e-21	2.80087e-15	7.72433e-25	7.72433e-25
M	39	H	1.4456e-15	1.16646e-20	1.16646e-20	2.10952e-24	2.01324e-22	2.10952e-24
M	39	T	1.33985e-23	1.66033e-11	1.33985e-23	1.55144e-16	2.63082e-14	1.55144e-16
M	39	L	4.46191e-23	3.34382e-32	3.34382e-32	1.31329e-12	1.74819e-16	1.74819e-16
M	39	V	4.26689e-17	1.83878e-15	4.26689e-17	4.03008e-14	5.4627e-08	4.03008e-14
M	39	C	1.70601e-10	2.27747e-12	2.27747e-12	2.22836e-12	5.97189e-09	2.22836e-12
M	39	S	1.29026e-12	2.27496e-06	1.29026e-12	3.40182e-10	1.69838e-06	3.40182e-10
M	39	A	8.83803e-08	0.00137793	8.83803e-08	6.92995e-07	8.64383e-08	8.64383e-08
M	39	Q	2.78429e-07	5.20353e-13	5.20353e-13	0.0018716	0.00743824	0.0018716
M	39	D	0.330424	1.64477e-11	1.64477e-11	0.00281241	0.194021	0.00281241
M	39	N	0.758693	0.863971	0.758693	0.00528096	0.118383	0.00528096
M	39	F	6.02773e-06	3.41205e-09	3.41205e-09	0.0179923	0.0160304	0.0160304
M	39	E	3.87525e-05	7.51245e-07	7.51245e-07	0.516578	0.630029	0.516578
M	39	G	0.0106708	0.0443024	0.0106708	0.598891	0.527223	0.527223
T	40	P	4.66729e-21	6.95969e-41	6.95969e-41	1.8381e-69	8.93525e-77	8.93525e-77
T	40	Q	3.04846e-22	1.56642e-20	3.04846e-22	6.80391e-21	1.40337e-17	6.80391e-21
T	40	R	2.43052e-26	1.38014e-26	1.38014e-26	2.53023e-18	9.08518e-11	2.53023e-18
T	40	K	1.10941e-35	4.84017e-33	1.10941e-35	1.44341e-09	2.64125e-16	2.64125e-16
T	40	A	1.12379e-08	2.09755e-07	1.12379e-08	1.71182e-15	3.96636e-09	1.71182e-15
T	40	S	5.9288e-16	2.60168e-13	5.9288e-16	1.251e-14	4.61193e-09	1.251e-14
T	40	L	4.23244e-05	0.851476	4.23244e-05	4.79829e-13	5.39282e-05	4.79829e-13
T	40	E	0.000213846	0.00626375	0.000213846	3.84511e-10	0.00529742	3.84511e-10
T	40	H	1.36967e-07	3.7142e-05	1.36967e-07	2.0009e-06	7.93881e-10	7.93881e-10
T	40	W	0.459063	6.4173e-06	6.4173e-06	1.67928e-08	1.38861e-09	1.38861e-09
T	40	C	0.000111277	3.6038e-06	3.6038e-06	0.00372188	5.78201e-09	5.78201e-09
T	40	V	4.52963e-15	2.17119e-12	4.52963e-15	1.64456e-08	1.22411e-08	1.22411e-08
T	40	M	0.000933789	2.19194e-05	2.19194e-05	4.04299e-08	6.23071e-05	4.04299e-08
T	40	I	0.0145994	0.0145644	0.0145644	0.125863	1.30735e-07	1.30735e-07
T	40	N	1.25685e-08	2.94834e-07	1.25685e-08	0.00196332	1.42938e-07	1.42938e-07
T	40	G	1.54403e-06	0.000956377	1.54403e-06	3.67315e-05	8.57172e-06	8.57172e-06
T	40	D	0.0492314	0.03558	0.03558	0.00181696	0.263131	0.00181696
T	40	Y	0.653448	0.185808	0.185808	0.459696	0.0308895	0.0308895
T	40	F	0.214335	0.55567	0.214335	0.0826532	0.0759827	0.0759827
K	41	L	7.1194e-40	1.49546e-39	7.1194e-40	2.76678e-111	1.38908e-66	2.76678e-111
K	41	I	6.79516e-26	1.87196e-26	1.87196e-26	3.12532e-93	4.00672e-67	3.12532e-93
K	41	W	8.19668e-42	1.32684e-38	8.19668e-42	1.29683e-89	9.66487e-93	9.66487e-93
K	41	T	4.27858e-28	1.29872e-31	1.29872e-31	3.4002e-76	5.11534e-91	5.11534e-91
K	41	P	8.54968e-43	2.65932e-38	8.54968e-43	1.99025e-82	1.55896e-74	1.99025e-82
K	41	V	2.56864e-36	2.09131e-44	2.09131e-44	7.86621e-81	2.33174e-76	7.86621e-81
K	41	Y	1.28406e-36	1.35541e-38	1.35541e-38	4.41033e-58	1.14801e-78	1.14801e-78
K	41	D	3.16916e-22	1.01656e-27	1.01656e-27	2.33004e-75	2.21067e-49	2.33004e-75
K	41	F	4.77884e-24	3.74676e-23	4.77884e-24	2.85986e-73	2.86883e-64	2.85986e-73
K	41	G	6.31024e-25	8.89438e-29	8.89438e-29	3.0526e-55	3.06783e-72	3.06783e-72
K	41	A	4.15787e-43	3.00197e-37	4.15787e-43	6.35119e-72	1.50496e-53	6.35119e-72
K	41	H	5.88936e-23	4.29375e-26	4.29375e-26	7.36658e-72	9.99994e-61	7.36658e-72
K	41	E	1.91768e-38	2.81969e-60	2.81969e-60	7.28233e-70	7.83615e-70	7.28233e-70
K	41	M	2.3098e-29	6.05e-21	2.3098e-29	3.25383e-68	1.04545e-47	3.25383e-68
K	41	S	7.88985e-27	6.54047e-54	6.54047e-54	1.77334e-66	5.01706e-37	1.77334e-66
K	41	C	5.49541e-30	1.95027e-27	5.49541e-30	1.20357e-44	2.48706e-65	2.48706e-65
K	41	N	5.86027e-25	2.40398e-23	5.86027e-25	3.1795e-63	1.16516e-46	3.1795e-63
K	41	Q	3.05848e-39	2.96153e-47	2.96153e-47	8.7082e-53	3.07325e-42	8.7082e-53
K	41	R	1.31517e-18	5.74006e-27	5.74006e-27	1.00856e-28	6.36467e-25	1.00856e-28
A	42	P	7.67369e-20	2.09527e-17	7.67369e-20	2.35022e-54	1.52567e-61	1.52567e-61
A	42	R	4.99936e-31	9.55525e-28	4.99936e-31	1.11897e-51	2.54661e-44	1.11897e-51
A	42	D	7.02411e-17	1.49936e-30	1.49936e-30	1.13988e-37	1.73461e-47	1.73461e-47
A	42	E	1.01417e-23	3.05976e-22	1.01417e-23	1.04414e-44	1.00305e-28	1.04414e-44
A	42	T	7.79842e-14	4.62836e-13	7.79842e-14	1.32183e-17	1.67131e-44	1.67131e-44
A	42	W	1.36409e-51	1.81455e-25	1.36409e-51	4.49031e-29	7.09804e-39	7.09804e-39
A	42	K	1.41929e-18	1.5614e-14	1.41929e-18	3.53559e-27	3.37213e-36	3.37213e-36
A	42	N	2.2032e-19	6.33288e-13	2.2032e-19	1.84955e-33	4.21098e-24	1.84955e-33
A	42	H	2.6306e-06	2.59797e-17	2.59797e-17	2.73526e-32	2.03108e-16	2.73526e-32
A	42	I	9.95764e-12	4.22851e-22	4.22851e-22	1.35158e-27	7.19068e-24	1.35158e-27
A	42	V	2.91231e-25	1.84215e-22	2.91231e-25	1.94791e-15	1.07665e-25	1.07665e-25
A	42	Q	3.46098e-15	2.16471e-16	2.16471e-16	1.44867e-15	2.12471e-17	2.12471e-17
A	42	M	6.49585e-18	8.75163e-14	6.49585e-18	2.82438e-16	4.22965e-13	2.82438e-16
A	42	G	8.04251e-37	1.22047e-38	1.22047e-38	3.91613e-16	2.3904e-15	3.91613e-16
A	42	S	2.05239e-11	1.51941e-12	1.51941e-12	1.12641e-08	3.24613e-15	3.24613e-15
A	42	F	1.60111e-14	1.60579e-19	1.60579e-19	8.94516e-14	3.07743e-12	8.94516e-14
A	42	Y	1.00232e-15	4.27485e-23	4.27485e-23	1.28117e-13	1.90185e-07	1.28117e-13
A	42	L	4.32115e-11	2.68264e-21	2.68264e-21	4.88543e-07	6.80882e-12	6.80882e-12
A	42	C	7.18385e-13	2.75513e-14	2.75513e-14	8.45552e-07	0.0266954	8.45552e-07
L	43	D	1.70419e-10	6.65427e-17	6.65427e-17	4.55709e-77	3.2487e-67	4.55709e-77
L	43	P	1.21975e-13	5.36973e-12	1.21975e-13	9.95945e-70	1.93534e-31	9.95945e-70
L	43	S	3.91338e-28	5.62294e-20	3.91338e-28	3.79644e-55	4.03478e-34	3.79644e-55
L	43	E	4.40053e-40	4.59489e-29	4.40053e-40	3.5973e-31	1.3513e-52	1.3513e-52
L	43	Q	6.37111e-14	4.25008e-27	4.25008e-27	2.46858e-47	3.91559e-47	2.46858e-47
L	43	G	6.56255e-18	1.9982e-19	1.9982e-19	2.17052e-43	1.33003e-27	2.17052e-43
L	43	K	8.05248e-10	8.86352e-20	8.86352e-20	2.10232e-41	8.05372e-36	2.10232e-41
L	43	R	0.000585145	1.70784e-15	1.70784e-15	7.71186e-35	2.17386e-19	7.71186e-35
L	43	H	9.41736e-14	5.35778e-08	9.41736e-14	9.42876e-35	8.67664e-26	9.42876e-35
L	43	T	7.72078e-07	3.16613e-08	3.16613e-08	3.07695e-29	1.42909e-18	3.07695e-29
L	43	N	3.22395e-09	2.08364e-09	2.08364e-09	1.25893e-28	1.28035e-23	1.25893e-28
L	43	Y	0.00667375	3.34393e-16	3.34393e-16	1.68971e-11	9.31959e-19	9.31959e-19
L	43	W	0.000121271	1.64413e-17	1.64413e-17	1.63477e-13	9.31369e-15	9.31369e-15
L	43	A	0.00903504	2.51666e-10	2.51666e-10	1.6743e-13	5.46706e-07	1.6743e-13
L	43	M	1.7404e-08	3.76096e-06	1.7404e-08	0.000134055	1.54395e-08	1.54395e-08
L	43	I	0.000416788	0.92887	0.000416788	4.34475e-05	6.70622e-08	6.70622e-08
L	43	V	0.785587	0.0500816	0.0500816	0.45086	0.0875013	0.0875013
L	43	F	0.508329	0.0792357	0.0792357	0.150309	0.735472	0.150309
L	43	C	0.879366	0.186021	0.186021	0.855028	0.556549	0.556549
G	44	V	1.92281e-17	7.73385e-21	7.73385e-21	6.56161e-27	2.61448e-23	6.56161e-27
G	44	P	2.23167e-09	2.39201e-12	2.39201e-12	5.54601e-23	3.3641e-16	5.54601e-23
G	44	W	5.26443e-08	5.07788e-11	5.07788e-11	4.85888e-18	1.40178e-20	1.40178e-20
G	44	I	6.67856e-12	1.02109e-10	6.67856e-12	1.84467e-16	4.08988e-10	1.84467e-16
G	44	Y	0.00128733	3.83517e-10	3.83517e-10	8.25768e-14	1.20326e-06	8.25768e-14
G	44	T	4.62393e-07	1.87548e-08	1.87548e-08	8.90815e-09	3.12348e-12	3.12348e-12
G	44	E	2.53961e-09	4.62693e-15	4.62693e-15	1.69571e-10	1.48205e-09	1.69571e-10
G	44	F	3.32358e-06	3.44649e-06	3.32358e-06	3.46847e-07	2.1907e-10	2.1907e-10
G	44	D	0.000107788	9.57637e-08	9.57637e-08	1.76639e-05	1.09598e-09	1.09598e-09
G	44	K	1.15096e-09	0.000532709	1.15096e-09	2.26095e-09	0.0291858	2.26095e-09
G	44	H	0.0111617	4.97939e-11	4.97939e-11	7.373e-08	0.000117558	7.373e-08
G	44	A	0.00212215	6.30171e-09	6.30171e-09	0.0248208	4.95466e-06	4.95466e-06
G	44	N	0.265183	0.0932013	0.0932013	0.00502199	0.863542	0.00502199
G	44	L	0.00174325	2.93957e-05	2.93957e-05	0.00532908	0.307853	0.00532908
G	44	S	0.199972	4.74524e-09	4.74524e-09	0.00757644	0.00637419	0.00637419
G	44	R	0.345208	0.0411988	0.0411988	0.0730889	0.854415	0.0730889
G	44	M	0.0041376	0.00143194	0.00143194	0.244722	0.936158	0.244722
G	44	C	0.164225	0.167473	0.164225	0.69862	0.319705	0.319705
G	44	Q	0.823238	0.514833	0.514833	0.502161	0.606054	0.502161
I	45	E	2.64557e-18	1.09134e-21	1.09134e-21	6.69217e-81	2.85929e-39	6.69217e-81
I	45	W	1.45992e-15	1.08747e-17	1.08747e-17	1.15082e-78	1.2596e-58	1.15082e-78
I	45	D	1.41655e-18	3.30207e-16	1.41655e-18	1.07491e-49	2.74119e-72	2.74119e-72
I	45	N	1.65561e-20	4.24173e-26	4.24173e-26	2.99298e-39	7.1361e-66	7.1361e-66
I	45	Y	2.48334e-15	5.26576e-33	5.26576e-33	6.99863e-54	1.79931e-29	6.99863e-54
I	45	P	4.7748e-34	2.84972e-28	4.7748e-34	4.92836e-40	7.69565e-39	4.92836e-40
I	45	Q	2.00875e-14	1.11874e-13	2.00875e-14	4.1041e-18	8.1953e-37	8.1953e-37
I	45	R	7.7112e-18	8.31275e-20	8.31275e-20	2.16049e-26	3.04241e-35	3.04241e-35
I	45	H	1.86981e-11	6.3638e-24	6.3638e-24	1.1554e-34	2.44091e-31	1.1554e-34
I	45	S	3.86064e-18	3.46644e-21	3.46644e-21	4.21881e-28	5.28601e-22	4.21881e-28
I	45	A	1.32335e-15	5.96043e-15	1.32335e-15	1.02118e-26	2.85116e-25	1.02118e-26
I	45	G	6.67234e-33	4.0479e-25	6.67234e-33	2.3239e-22	1.06177e-26	1.06177e-26
I	45	K	4.75047e-26	7.78725e-12	4.75047e-26	3.18076e-17	4.50471e-20	4.50471e-20
I	45	F	1.97639e-06	1.75846e-06	1.75846e-06	5.40798e-09	2.59808e-09	2.59808e-09
I	45	M	1.35777e-07	2.01223e-06	1.35777e-07	0.00509557	5.65951e-05	5.65951e-05
I	45	V	1.8201e-09	1.32154e-05	1.8201e-09	0.000254243	0.000151866	0.000151866
I	45	L	1.08115e-05	0.00162635	1.08115e-05	0.00119335	0.0113178	0.00119335
I	45	T	0.118829	1.90879e-06	1.90879e-06	0.0578531	0.455556	0.0578531
I	45	C	3.83875e-05	0.000239202	3.83875e-05	0.0666743	0.996948	0.0666743
S	46	T	2.818e-27	6.43912e-40	6.43912e-40	2.00065e-21	1.38081e-24	1.38081e-24
S	46	R	3.21608e-33	7.43762e-36	7.43762e-36	4.03958e-19	6.6197e-23	6.6197e-23
S	46	N	8.46999e-19	3.20835e-14	8.46999e-19	3.4291e-21	2.03391e-09	3.4291e-21
S	46	H	1.99377e-17	5.03873e-17	1.99377e-17	3.60547e-12	6.55437e-20	6.55437e-20
S	46	C	2.38836e-18	3.44237e-14	2.38836e-18	4.55611e-19	1.15285e-14	4.55611e-19
S	46	Y	9.55502e-18	7.74347e-16	9.55502e-18	7.87705e-19	3.49317e-12	7.87705e-19
S	46	G	4.58471e-16	4.72961e-09	4.58471e-16	2.03132e-12	1.21078e-18	1.21078e-18
S	46	Q	2.15151e-31	5.41419e-28	2.15151e-31	4.05653e-18	7.72206e-14	4.05653e-18
S	46	V	1.04497e-24	4.10598e-17	1.04497e-24	1.8188e-14	1.53863e-17	1.53863e-17
S	46	E	6.55575e-11	1.22788e-17	1.22788e-17	4.5434e-14	3.44297e-10	4.5434e-14
S	46	K	1.25382e-28	1.66076e-24	1.25382e-28	5.95597e-12	4.80521e-14	4.80521e-14
S	46	A	3.36058e-17	6.10972e-21	6.10972e-21	1.09967e-13	1.10091e-13	1.09967e-13
S	46	I	1.04817e-09	3.47258e-08	1.04817e-09	9.48705e-13	9.8524e-07	9.48705e-13
S	46	W	5.86542e-19	6.94964e-06	5.86542e-19	3.20989e-05	1.1667e-10	1.1667e-10
S	46	D	2.28514e-05	7.7345e-05	2.28514e-05	3.0969e-07	2.08062e-09	2.08062e-09
S	46	M	4.9466e-12	4.72851e-15	4.72851e-15	0.00651897	4.11637e-09	4.11637e-09
S	46	L	9.43491e-09	0.000524975	9.43491e-09	0.000526458	1.27564e-07	1.27564e-07
S	46	F	8.40705e-12	2.96277e-06	8.40705e-12	0.000141156	0.000574428	0.000141156
S	46	P	0.303768	0.0730272	0.0730272	0.554246	0.607377	0.554246
Y	47	N	7.10954e-31	2.66232e-25	7.10954e-31	2.86959e-22	8.40148e-19	2.86959e-22
Y	47	I	1.66665e-06	0.00454048	1.66665e-06	4.73204e-07	3.0851e-14	3.0851e-14
Y	47	T	4.12699e-06	1.06572e-06	1.06572e-06	2.8176e-07	1.11718e-09	1.11718e-09
Y	47	V	4.74098e-11	0.000169293	4.74098e-11	8.1049e-08	2.33776e-09	2.33776e-09
Y	47	C	0.000641789	7.03139e-10	7.03139e-10	1.61956e-07	2.50469e-07	1.61956e-07
Y	47	S	1.1191e-10	3.93351e-06	1.1191e-10	3.4303e-07	1.04194e-06	3.4303e-07
Y	47	W	2.04214e-06	1.17087e-09	1.17087e-09	0.0012674	1.45909e-05	1.45909e-05
Y	47	K	0.000132778	4.38196e-07	4.38196e-07	5.17856e-05	0.000304068	5.17856e-05
Y	47	H	0.0719362	0.0452349	0.0452349	9.88407e-05	0.000227139	9.88407e-05
Y	47	A	3.63914e-05	3.2183e-05	3.2183e-05	0.000201694	0.0301008	0.000201694
Y	47	Q	0.148233	0.0639801	0.0639801	0.00977416	0.000238569	0.000238569
Y	47	F	0.200854	0.759882	0.200854	0.000344431	0.0027988	0.000344431
Y	47	E	3.92096e-11	1.72143e-05	3.92096e-11	0.00483861	0.00947309	0.00483861
Y	47	G	0.288103	0.778026	0.288103	0.038622	0.0561648	0.038622
Y	47	P	0.455912	0.214726	0.214726	0.0699041	0.762455	0.0699041
Y	47	L	0.545624	0.49953	0.49953	0.104362	0.226635	0.104362
Y	47	R	0.0497335	0.0597032	0.0497335	0.128775	0.764802	0.128775
Y	47	M	0.117003	0.0120724	0.0120724	0.884756	0.178816	0.178816
Y	47	D	4.54935e-06	2.06847e-10	2.06847e-10	0.410856	0.486327	0.410856
G	48	S	2.15925e-29	1.32033e-29	1.32033e-29	6.26903e-31	4.03247e-17	6.26903e-31
G	48	V	3.25497e-35	3.13647e-30	3.25497e-35	7.31155e-28	8.30241e-20	7.31155e-28
G	48	K	3.44302e-26	1.65653e-25	3.44302e-26	1.64799e-24	1.14183e-12	1.64799e-24
G	48	H	7.85859e-28	5.27631e-28	5.27631e-28	2.14026e-23	1.2718e-10	2.14026e-23
G	48	R	2.03314e-35	2.92314e-21	2.03314e-35	3.68334e-23	1.23341e-16	3.68334e-23
G	48	L	1.90944e-28	1.63498e-23	1.90944e-28	2.47971e-21	4.34549e-18	2.47971e-21
G	48	W	2.26849e-21	4.47277e-33	4.47277e-33	4.93092e-21	5.67226e-14	4.93092e-21
G	48	E	4.64473e-09	2.84188e-07	4.64473e-09	8.60453e-21	2.16296e-20	8.60453e-21
G	48	A	1.43433e-23	9.78598e-20	1.43433e-23	2.63007e-14	3.42673e-19	3.42673e-19
G	48	I	3.73947e-19	1.07182e-25	1.07182e-25	4.23236e-17	6.7666e-13	4.23236e-17
G	48	Y	5.7607e-15	2.90529e-19	2.90529e-19	3.12895e-15	1.33124e-14	3.12895e-15
G	48	Q	4.34955e-39	1.44164e-22	4.34955e-39	9.55227e-15	1.67045e-13	9.55227e-15
G	48	P	1.56126e-16	5.99683e-12	1.56126e-16	2.9303e-13	1.63351e-11	2.9303e-13
G	48	N	2.24182e-22	9.89259e-32	9.89259e-32	9.24396e-13	1.01204e-12	9.24396e-13
G	48	T	4.55216e-30	3.602e-28	4.55216e-30	2.76532e-12	2.43409e-12	2.43409e-12
G	48	M	8.0404e-23	5.25821e-26	5.25821e-26	1.22579e-10	4.28099e-12	4.28099e-12
G	48	F	7.60012e-13	1.40623e-06	7.60012e-13	1.27923e-10	6.96462e-11	6.96462e-11
G	48	C	2.51282e-10	2.14037e-10	2.14037e-10	2.6516e-07	2.26618e-05	2.6516e-07
G	48	D	0.729143	0.0166477	0.0166477	1.59869e-05	3.15949e-06	3.15949e-06
R	49	K	2.95313e-33	4.13351e-44	4.13351e-44	4.28223e-25	1.09613e-29	1.09613e-29
R	49	A	2.03505e-09	3.59506e-06	2.03505e-09	7.33054e-22	6.09888e-19	7.33054e-22
R	49	M	3.09513e-06	0.0635179	3.09513e-06	6.07275e-20	3.55537e-10	6.07275e-20
R	49	V	0.000182775	2.10738e-06	2.10738e-06	2.92531e-18	1.24287e-14	2.92531e-18
R	49	I	6.31448e-05	0.000211897	6.31448e-05	3.91132e-16	2.13576e-08	3.91132e-16
R	49	C	7.24645e-07	0.00010273	7.24645e-07	1.33429e-08	1.20815e-15	1.20815e-15
R	49	Y	5.00001e-06	7.32208e-07	7.32208e-07	1.95295e-15	5.00548e-13	1.95295e-15
R	49	T	0.000516989	1.29555e-07	1.29555e-07	1.61106e-13	1.29104e-14	1.29104e-14
R	49	S	3.76809e-09	0.0137476	3.76809e-09	1.19961e-11	2.78642e-13	2.78642e-13
R	49	Q	1.72646e-10	1.25471e-11	1.25471e-11	4.65679e-13	3.60369e-10	4.65679e-13
R	49	H	1.38348e-10	7.26821e-08	1.38348e-10	3.00101e-12	2.11918e-09	3.00101e-12
R	49	F	0.00985306	0.000554714	0.000554714	4.60088e-12	2.04357e-05	4.60088e-12
R	49	G	8.73387e-10	1.47845e-09	8.73387e-10	9.54266e-11	1.68335e-08	9.54266e-11
R	49	W	0.028826	0.283538	0.028826	3.01132e-10	4.57938e-08	3.01132e-10
R	49	L	4.23291e-05	0.0597646	4.23291e-05	1.91346e-08	3.38553e-09	3.38553e-09
R	49	P	1.23954e-08	3.5392e-08	1.23954e-08	2.89526e-08	1.67146e-07	2.89526e-08
R	49	N	6.40977e-05	0.135995	6.40977e-05	1.66544e-07	4.31516e-05	1.66544e-07
R	49	E	0.00493526	2.72913e-07	2.72913e-07	0.00809826	0.867602	0.00809826
R	49	D	1.20883e-12	1.99213e-13	1.99213e-13	0.734383	0.260468	0.260468
K	50	R	2.65675e-35	1.75216e-28	2.65675e-35	6.29257e-20	3.98627e-22	3.98627e-22
K	50	H	0.000122658	0.0202887	0.000122658	1.22198e-10	1.51587e-06	1.22198e-10
K	50	T	0.386961	0.287451	0.287451	5.87742e-09	9.53755e-10	9.53755e-10
K	50	P	0.603177	0.0533171	0.0533171	6.23491e-09	2.21788e-09	2.21788e-09
K	50	Q	0.243836	0.29317	0.243836	1.49335e-05	2.76799e-09	2.76799e-09
K	50	S	1.9793e-07	0.0348405	1.9793e-07	1.32721e-07	2.29466e-08	2.29466e-08
K	50	M	0.0409199	0.0158434	0.0158434	3.52902e-07	0.111689	3.52902e-07
K	50	G	0.94047	0.472883	0.472883	6.61666e-06	6.2252e-07	6.2252e-07
K	50	N	0.110957	0.71936	0.110957	0.00202225	2.14928e-05	2.14928e-05
K	50	V	0.699007	0.00235252	0.00235252	2.52857e-05	0.00320142	2.52857e-05
K	50	A	0.222606	0.795222	0.222606	0.000394989	0.000585337	0.000394989
K	50	C	0.890061	0.00522363	0.00522363	0.000405865	0.00588605	0.000405865
K	50	I	0.0320339	0.00601605	0.00601605	0.0277532	0.00253323	0.00253323
K	50	L	0.456773	0.0621046	0.0621046	0.00270972	0.00636399	0.00270972
K	50	W	0.71912	0.00180213	0.00180213	0.00863809	0.0250544	0.00863809
K	50	D	0.00846701	5.2544e-08	5.2544e-08	0.297381	0.0138602	0.0138602
K	50	F	0.28919	0.258797	0.258797	0.028696	0.0477132	0.028696
K	50	Y	0.224478	0.000538795	0.000538795	0.136713	0.258399	0.136713
K	50	E	3.04476e-08	1.18183e-16	1.18183e-16	0.393285	0.146207	0.146207
K	51	W	7.23266e-18	9.28612e-12	7.23266e-18	8.25274e-13	8.80091e-19	8.80091e-19
K	51	R	8.08122e-18	8.11082e-23	8.11082e-23	1.1175e-12	1.00458e-18	1.00458e-18
K	51	Q	1.22331e-12	1.21741e-09	1.22331e-12	2.3873e-14	1.03156e-13	2.3873e-14
K	51	T	4.83761e-09	5.47948e-10	5.47948e-10	3.18938e-14	2.38064e-11	3.18938e-14
K	51	Y	1.57778e-14	7.8233e-22	7.8233e-22	9.06812e-10	4.95562e-14	4.95562e-14
K	51	M	6.44737e-11	5.53047e-14	5.53047e-14	3.45438e-12	5.2222e-14	5.2222e-14
K	51	F	1.32498e-15	3.69853e-15	1.32498e-15	2.12216e-10	1.42721e-12	1.42721e-12
K	51	V	1.38479e-11	4.94522e-07	1.38479e-11	4.11213e-12	3.08452e-11	4.11213e-12
K	51	S	2.95416e-05	0.0037707	2.95416e-05	1.68065e-10	3.5485e-10	1.68065e-10
K	51	L	7.12034e-06	0.0256506	7.12034e-06	3.88099e-10	3.01074e-10	3.01074e-10
K	51	P	0.000294145	0.000162296	0.000162296	4.07494e-09	2.0921e-09	2.0921e-09
K	51	A	0.0148432	0.0028266	0.0028266	5.15969e-09	5.6082e-05	5.15969e-09
K	51	H	2.98927e-28	3.47313e-12	2.98927e-28	7.6927e-09	9.10912e-07	7.6927e-09
K	51	N	2.8887e-07	1.13506e-06	2.8887e-07	1.60591e-08	3.9253e-05	1.60591e-08
K	51	I	2.24108e-12	2.39463e-08	2.24108e-12	2.45639e-08	8.86251e-06	2.45639e-08
K	51	C	0.000106902	0.00118449	0.000106902	2.77634e-08	2.00491e-06	2.77634e-08
K	51	G	0.000129168	0.00246175	0.000129168	5.73722e-05	0.000562558	5.73722e-05
K	51	E	0.0189825	0.00881102	0.00881102	0.0144244	0.464811	0.0144244
K	51	D	0.000387541	8.0703e-05	8.0703e-05	0.619616	0.431439	0.431439
R	52	P	7.72226e-17	1.29472e-16	7.72226e-17	1.4545e-11	6.72484e-22	6.72484e-22
R	52	Q	0.000992667	1.36617e-05	1.36617e-05	1.04679e-16	5.34476e-07	1.04679e-16
R	52	L	0.000293746	5.86177e-08	5.86177e-08	9.95904e-16	8.70784e-05	9.95904e-16
R	52	Y	6.18805e-21	5.68522e-12	6.18805e-21	1.18409e-14	9.30946e-13	1.18409e-14
R	52	W	2.36576e-08	1.06771e-12	1.06771e-12	1.44972e-14	4.11126e-11	1.44972e-14
R	52	G	0.173519	0.0128798	0.0128798	3.20512e-14	2.4221e-10	3.20512e-14
R	52	I	0.00319302	0.000954909	0.000954909	3.88784e-13	7.72784e-10	3.88784e-13
R	52	F	3.33481e-08	1.15647e-10	1.15647e-10	1.54215e-12	2.65993e-08	1.54215e-12
R	52	S	5.79263e-08	0.0064498	5.79263e-08	4.43354e-12	4.84515e-09	4.43354e-12
R	52	K	1.26767e-18	1.51539e-14	1.26767e-18	1.14115e-11	6.41392e-12	6.41392e-12
R	52	A	0.00265111	4.16041e-05	4.16041e-05	2.12847e-09	1.62658e-11	1.62658e-11
R	52	V	0.000128764	1.92336e-05	1.92336e-05	1.65918e-08	7.68527e-11	7.68527e-11
R	52	M	0.00116446	0.00807256	0.00116446	3.77393e-08	0.000171665	3.77393e-08
R	52	C	0.00180848	0.874451	0.00180848	1.12001e-07	0.000780962	1.12001e-07
R	52	T	0.0045109	0.0926068	0.0045109	2.03515e-05	3.11482e-07	3.11482e-07
R	52	N	9.7315e-05	0.039213	9.7315e-05	8.90127e-07	0.00432171	8.90127e-07
R	52	H	1.22392e-09	0.00101577	1.22392e-09	1.53189e-06	3.08518e-06	1.53189e-06
R	52	D	4.63424e-05	9.96692e-11	9.96692e-11	0.194116	0.0570898	0.0570898
R	52	E	1.63054e-05	9.15215e-05	1.63054e-05	0.696373	0.998161	0.696373
R	53	G	4.15635e-35	1.52058e-26	4.15635e-35	1.90317e-20	2.51551e-15	1.90317e-20
R	53	Q	1.74801e-17	8.92421e-24	8.92421e-24	1.53014e-07	2.76901e-18	2.76901e-18
R	53	C	5.25895e-07	8.22683e-08	8.22683e-08	1.48189e-12	3.51424e-16	3.51424e-16
R	53	P	1.37107e-15	2.84711e-23	2.84711e-23	7.60317e-16	3.70916e-08	7.60317e-16
R	53	A	1.18025e-12	8.86896e-12	1.18025e-12	3.00479e-15	2.40808e-10	3.00479e-15
R	53	H	6.11736e-07	4.83907e-05	6.11736e-07	5.62704e-09	3.78092e-13	3.78092e-13
R	53	L	0.689046	0.345227	0.345227	2.17233e-12	1.94585e-07	2.17233e-12
R	53	T	2.60788e-07	7.96936e-07	2.60788e-07	6.58636e-12	1.57192e-11	6.58636e-12
R	53	Y	0.0931982	0.101187	0.0931982	3.68273e-10	1.199e-07	3.68273e-10
R	53	K	6.07882e-16	3.39824e-09	6.07882e-16	6.14762e-07	4.47022e-10	4.47022e-10
R	53	S	9.504e-10	1.4069e-11	1.4069e-11	4.19623e-07	6.8459e-09	6.8459e-09
R	53	N	0.00132303	6.74693e-06	6.74693e-06	3.00553e-05	1.01304e-08	1.01304e-08
R	53	V	0.000157968	0.00276077	0.000157968	1.40196e-07	5.40719e-06	1.40196e-07
R	53	D	1.33248e-10	1.07103e-14	1.07103e-14	0.00133842	2.82562e-06	2.82562e-06
R	53	W	0.885854	0.794976	0.794976	7.83438e-06	0.0291961	7.83438e-06
R	53	M	0.0154914	0.915603	0.0154914	1.71291e-05	0.000232899	1.71291e-05
R	53	E	1.46643e-11	5.45703e-11	1.46643e-11	4.47933e-05	0.000739795	4.47933e-05
R	53	I	0.0712993	0.0619547	0.0619547	0.0198538	8.31156e-05	8.31156e-05
R	53	F	0.457382	0.892469	0.457382	0.00151276	0.000690067	0.000690067
Q	54	R	1.79875e-25	4.41068e-15	1.79875e-25	8.05028e-21	1.2405e-14	8.05028e-21
Q	54	T	1.18155e-19	3.63804e-22	3.63804e-22	1.27174e-19	2.91308e-13	1.27174e-19
Q	54	Y	6.53757e-09	7.5074e-08	6.53757e-09	2.18086e-11	2.44237e-19	2.44237e-19
Q	54	H	6.77624e-20	1.26965e-30	1.26965e-30	4.35143e-19	2.65876e-16	4.35143e-19
Q	54	G	5.88213e-39	5.33373e-24	5.88213e-39	5.13983e-16	5.14164e-19	5.14164e-19
Q	54	K	8.44579e-22	3.59337e-19	8.44579e-22	1.2502e-11	1.07203e-18	1.07203e-18
Q	54	V	5.26079e-19	3.45089e-12	5.26079e-19	4.33454e-18	7.98973e-18	4.33454e-18
Q	54	P	6.32235e-15	1.58573e-21	1.58573e-21	3.87872e-15	4.82025e-13	3.87872e-15
Q	54	C	9.17218e-19	1.18766e-16	9.17218e-19	1.23508e-12	2.20824e-14	2.20824e-14
Q	54	S	2.62859e-24	9.53161e-20	2.62859e-24	4.89291e-13	2.76433e-14	2.76433e-14
Q	54	I	8.86552e-15	1.12287e-10	8.86552e-15	7.9595e-10	2.79711e-14	2.79711e-14
Q	54	D	0.00277969	0.00231418	0.00231418	5.69253e-11	5.41115e-14	5.41115e-14
Q	54	M	1.2558e-20	6.92297e-27	6.92297e-27	2.28173e-12	6.14543e-13	6.14543e-13
Q	54	A	8.58791e-14	1.49398e-21	1.49398e-21	4.66152e-12	3.65878e-07	4.66152e-12
Q	54	W	9.16209e-10	6.94315e-12	6.94315e-12	5.00064e-12	3.76855e-09	5.00064e-12
Q	54	F	3.00513e-11	2.51633e-09	3.00513e-11	6.50117e-11	9.37374e-12	9.37374e-12
Q	54	N	1.46614e-19	3.67479e-16	1.46614e-19	2.48917e-10	2.52648e-10	2.48917e-10
Q	54	L	3.34183e-16	4.96616e-15	3.34183e-16	2.76371e-08	5.95692e-09	5.95692e-09
Q	54	E	0.0126556	0.064248	0.0126556	1.8236e-08	0.00122867	1.8236e-08
R	55	H	2.08187e-29	1.94443e-18	2.08187e-29	5.75799e-17	7.0333e-09	5.75799e-17
R	55	Q	1.1246e-11	4.52541e-08	1.1246e-11	5.51865e-15	8.43136e-16	8.43136e-16
R	55	K	4.99213e-24	1.53251e-20	4.99213e-24	4.44519e-12	4.17211e-15	4.17211e-15
R	55	I	0.01231	0.364302	0.01231	4.38276e-08	2.36581e-13	2.36581e-13
R	55	C	0.00153371	0.00786653	0.00153371	1.19954e-12	2.50639e-06	1.19954e-12
R	55	G	1.01439e-10	1.29829e-10	1.01439e-10	1.82691e-12	6.48962e-05	1.82691e-12
R	55	L	0.00165512	3.72801e-05	3.72801e-05	3.68073e-12	4.365e-05	3.68073e-12
R	55	P	2.95747e-09	1.0474e-05	2.95747e-09	5.78331e-07	7.00897e-12	7.00897e-12
R	55	T	7.47862e-11	2.31507e-06	7.47862e-11	4.34013e-11	3.14886e-08	4.34013e-11
R	55	N	8.87676e-22	7.24536e-15	8.87676e-22	2.00764e-10	1.20936e-09	2.00764e-10
R	55	A	4.14967e-09	2.641e-08	4.14967e-09	9.82431e-08	3.91661e-09	3.91661e-09
R	55	M	0.00258888	0.00991137	0.00258888	2.35854e-08	4.15278e-05	2.35854e-08
R	55	V	0.562413	0.229479	0.229479	3.17664e-07	2.6178e-06	3.17664e-07
R	55	W	0.002714	0.0761658	0.002714	0.00250231	5.28613e-07	5.28613e-07
R	55	Y	0.199472	0.739809	0.199472	2.79302e-06	2.96106e-06	2.79302e-06
R	55	S	0.362404	3.205e-05	3.205e-05	0.00385996	5.03944e-06	5.03944e-06
R	55	F	0.0639869	0.21231	0.0639869	0.000119137	0.00551046	0.000119137
R	55	D	0.257948	0.085724	0.085724	0.0425095	0.151177	0.0425095
R	55	E	0.000190182	4.22324e-06	4.22324e-06	0.356916	0.176424	0.176424
R	56	K	8.35607e-17	9.8733e-24	9.8733e-24	6.00107e-19	4.42328e-20	4.42328e-20
R	56	W	1.65311e-08	3.85479e-05	1.65311e-08	6.63391e-20	3.98082e-13	6.63391e-20
R	56	S	1.96014e-19	1.16373e-09	1.96014e-19	4.70491e-18	6.1332e-09	4.70491e-18
R	56	T	1.10023e-07	2.15195e-09	2.15195e-09	2.00058e-05	1.34744e-15	1.34744e-15
R	56	N	1.25866e-17	2.93392e-14	1.25866e-17	1.49472e-12	1.8227e-14	1.8227e-14
R	56	H	5.94834e-14	3.36841e-11	5.94834e-14	4.42862e-14	5.63669e-12	4.42862e-14
R	56	C	0.00225334	0.00100908	0.00100908	1.70369e-11	1.441e-13	1.441e-13
R	56	Q	9.62506e-09	1.65478e-11	1.65478e-11	2.84448e-13	1.97757e-12	2.84448e-13
R	56	A	7.54674e-05	1.93485e-05	1.93485e-05	3.09731e-13	1.02988e-06	3.09731e-13
R	56	V	1.11821e-08	7.498e-07	1.11821e-08	3.53049e-12	9.61261e-12	3.53049e-12
R	56	P	5.24906e-12	3.95001e-06	5.24906e-12	9.6382e-11	5.39836e-12	5.39836e-12
R	56	G	8.71635e-08	1.75008e-07	8.71635e-08	9.95516e-08	1.96868e-10	1.96868e-10
R	56	I	0.0146605	0.0125885	0.0125885	1.32395e-06	6.41065e-10	6.41065e-10
R	56	Y	6.89376e-08	0.000216259	6.89376e-08	3.50209e-08	8.29528e-10	8.29528e-10
R	56	F	3.09485e-06	6.76869e-05	3.09485e-06	2.19837e-08	4.50469e-09	4.50469e-09
R	56	M	0.000184912	7.22196e-05	7.22196e-05	1.54422e-08	4.96569e-09	4.96569e-09
R	56	L	1.4493e-06	0.015342	1.4493e-06	1.08524e-08	1.45724e-07	1.08524e-08
R	56	E	0.00012282	0.000466672	0.00012282	2.54245e-05	0.0102077	2.54245e-05
R	56	D	0.753782	0.529657	0.529657	0.0338747	0.000474992	0.000474992
R	57	H	5.27838e-21	2.15328e-23	2.15328e-23	2.23417e-26	1.85234e-16	2.23417e-26
R	57	T	1.03261e-16	1.70501e-19	1.70501e-19	1.3834e-25	2.30969e-14	1.3834e-25
R	57	N	7.01049e-18	2.07654e-11	7.01049e-18	1.17163e-21	3.38379e-15	1.17163e-21
R	57	M	5.78116e-11	9.57379e-18	9.57379e-18	8.14394e-15	1.55208e-21	1.55208e-21
R	57	G	1.35926e-21	7.03512e-16	1.35926e-21	3.67837e-18	5.51613e-13	3.67837e-18
R	57	S	4.28272e-15	3.5935e-27	3.5935e-27	2.24661e-14	7.25356e-18	7.25356e-18
R	57	V	1.4285e-15	6.28676e-13	1.4285e-15	1.80911e-17	6.22908e-11	1.80911e-17
R	57	P	1.64585e-13	6.60128e-15	6.60128e-15	5.86403e-13	1.68667e-16	1.68667e-16
R	57	E	6.70821e-05	4.59031e-05	4.59031e-05	9.63633e-08	3.20145e-16	3.20145e-16
R	57	A	2.63716e-22	5.98846e-09	2.63716e-22	1.37931e-15	5.77605e-15	1.37931e-15
R	57	I	1.81282e-08	2.99765e-09	2.99765e-09	1.48437e-15	1.51533e-07	1.48437e-15
R	57	Y	5.60457e-13	7.29914e-11	5.60457e-13	3.18546e-15	5.29163e-14	3.18546e-15
R	57	L	3.79767e-15	9.80479e-11	3.79767e-15	3.49618e-13	5.20012e-15	5.20012e-15
R	57	Q	2.79876e-21	3.03319e-12	2.79876e-21	5.3e-15	5.81643e-11	5.3e-15
R	57	K	6.61683e-21	2.06373e-26	2.06373e-26	9.97456e-15	7.12976e-14	9.97456e-15
R	57	F	8.24022e-10	4.66955e-05	8.24022e-10	6.86875e-14	1.73179e-08	6.86875e-14
R	57	C	9.80855e-09	5.0826e-10	5.0826e-10	5.77031e-10	2.38754e-13	2.38754e-13
R	57	W	3.08982e-12	1.00238e-07	3.08982e-12	2.72177e-12	5.76933e-09	2.72177e-12
R	57	D	2.49586e-08	3.39666e-07	2.49586e-08	3.33559e-12	1.59981e-09	3.33559e-12
A	58	K	3.65004e-31	5.00689e-22	3.65004e-31	2.22182e-34	8.65026e-19	2.22182e-34
A	58	Y	9.20896e-29	1.66716e-22	9.20896e-29	1.3101e-22	3.15508e-16	1.3101e-22
A	58	V	2.43826e-28	4.14545e-13	2.43826e-28	6.04801e-21	2.27463e-14	6.04801e-21
A	58	T	3.33218e-21	6.01482e-30	6.01482e-30	4.26173e-20	8.15764e-21	8.15764e-21
A	58	I	1.02542e-13	6.40629e-15	6.40629e-15	1.76839e-07	1.02913e-20	1.02913e-20
A	58	P	1.12732e-34	3.28706e-25	1.12732e-34	2.56484e-20	7.47043e-15	2.56484e-20
A	58	D	5.3995e-28	1.29622e-23	5.3995e-28	1.27308e-19	2.37675e-17	1.27308e-19
A	58	E	1.34417e-19	9.39582e-16	1.34417e-19	1.67595e-11	2.72276e-19	2.72276e-19
A	58	H	1.98095e-17	1.37495e-19	1.37495e-19	3.00918e-19	1.03029e-11	3.00918e-19
A	58	R	2.5623e-31	4.68568e-24	2.5623e-31	5.32992e-17	1.49381e-14	5.32992e-17
A	58	G	2.9901e-34	1.62208e-21	2.9901e-34	1.65206e-12	8.83353e-17	8.83353e-17
A	58	Q	7.77067e-11	6.38008e-22	6.38008e-22	5.66281e-11	1.49955e-15	1.49955e-15
A	58	M	3.91731e-24	3.07017e-27	3.07017e-27	1.69289e-15	4.9983e-12	1.69289e-15
A	58	N	1.29377e-17	1.83256e-16	1.29377e-17	8.96382e-15	9.74639e-12	8.96382e-15
A	58	W	4.16778e-10	2.36498e-11	2.36498e-11	7.41523e-10	7.43906e-14	7.43906e-14
A	58	S	8.39587e-17	1.39569e-25	1.39569e-25	2.3099e-13	6.2912e-11	2.3099e-13
A	58	F	3.21688e-21	5.52312e-19	3.21688e-21	7.49448e-13	2.30191e-06	7.49448e-13
A	58	L	1.6224e-12	7.95289e-14	7.95289e-14	6.06344e-12	8.17182e-12	6.06344e-12
A	58	C	2.14933e-13	2.84388e-09	2.14933e-13	4.31413e-09	1.4612e-11	1.4612e-11
H	59	K	4.16961e-24	9.81052e-22	4.16961e-24	1.59399e-28	1.48413e-22	1.59399e-28
H	59	R	4.20584e-29	1.18919e-19	4.20584e-29	4.16859e-23	1.09951e-17	4.16859e-23
H	59	C	1.47406e-15	5.39114e-27	5.39114e-27	2.59065e-12	2.11475e-22	2.11475e-22
H	59	M	2.73118e-25	2.60549e-21	2.73118e-25	1.55544e-12	1.01229e-20	1.01229e-20
H	59	N	3.93961e-36	8.47399e-26	3.93961e-36	3.63161e-13	3.73598e-20	3.73598e-20
H	59	P	1.67431e-24	2.31802e-17	1.67431e-24	8.50739e-20	4.00805e-16	8.50739e-20
H	59	S	4.21802e-20	5.58474e-25	5.58474e-25	1.48758e-15	1.0818e-17	1.0818e-17
H	59	L	2.77273e-12	7.33368e-12	2.77273e-12	5.52137e-12	1.67709e-17	1.67709e-17
H	59	I	9.0556e-17	3.23433e-13	9.0556e-17	2.56107e-16	2.13243e-08	2.56107e-16
H	59	Q	1.34897e-31	9.13899e-15	1.34897e-31	9.73502e-14	5.63042e-15	5.63042e-15
H	59	W	6.55946e-20	1.4816e-20	1.4816e-20	7.19011e-15	1.37137e-13	7.19011e-15
H	59	Y	6.91163e-22	3.18235e-17	6.91163e-22	3.65256e-14	1.08703e-14	1.08703e-14
H	59	V	1.04203e-18	5.31115e-24	5.31115e-24	1.25669e-12	1.46307e-14	1.46307e-14
H	59	D	4.19337e-12	1.40738e-06	4.19337e-12	9.37024e-14	3.56383e-14	3.56383e-14
H	59	F	8.42631e-13	5.52148e-17	5.52148e-17	2.50527e-13	2.46251e-13	2.46251e-13
H	59	E	3.61022e-17	1.4558e-15	3.61022e-17	3.29505e-13	2.34854e-11	3.29505e-13
H	59	A	1.87578e-18	3.82522e-15	1.87578e-18	1.82202e-12	3.56196e-13	3.56196e-13
H	59	G	1.20804e-26	9.0383e-26	1.20804e-26	1.56694e-11	2.36303e-11	1.56694e-11
H	59	T	1.6044e-28	9.1902e-22	1.6044e-28	1.25908e-09	5.26371e-10	5.26371e-10
Q	60	L	2.39468e-33	3.2022e-33	2.39468e-33	3.49359e-32	9.43944e-23	3.49359e-32
Q	60	H	2.45195e-31	2.8851e-20	2.45195e-31	1.55417e-23	4.17251e-20	1.55417e-23
Q	60	F	2.92386e-25	5.33212e-27	5.33212e-27	6.92417e-23	1.44566e-15	6.92417e-23
Q	60	S	1.83261e-25	6.96824e-22	1.83261e-25	1.36185e-22	9.68341e-19	1.36185e-22
Q	60	G	1.57478e-28	2.04199e-28	1.57478e-28	1.69204e-22	7.83326e-14	1.69204e-22
Q	60	M	1.10465e-27	2.25019e-18	1.10465e-27	1.50679e-21	8.00585e-12	1.50679e-21
Q	60	R	1.35488e-29	2.47496e-22	1.35488e-29	2.89692e-21	7.70094e-14	2.89692e-21
Q	60	T	7.82943e-32	3.60147e-29	7.82943e-32	9.60514e-21	1.71687e-11	9.60514e-21
Q	60	A	2.72072e-18	2.53448e-16	2.72072e-18	1.09449e-19	2.9525e-10	1.09449e-19
Q	60	W	6.47542e-22	5.55581e-20	6.47542e-22	9.07356e-19	1.21819e-17	9.07356e-19
Q	60	E	1.00728e-22	1.99743e-25	1.99743e-25	1.66725e-18	4.0624e-18	1.66725e-18
Q	60	V	3.00137e-35	1.78432e-32	3.00137e-35	2.38644e-18	8.77546e-14	2.38644e-18
Q	60	P	1.86455e-17	8.0208e-14	1.86455e-17	2.40361e-17	2.91698e-16	2.40361e-17
Q	60	I	5.60816e-30	2.4562e-20	5.60816e-30	2.89502e-17	6.90168e-16	2.89502e-17
Q	60	K	2.29768e-25	6.05723e-21	2.29768e-25	1.5398e-13	1.14382e-16	1.14382e-16
Q	60	C	6.0814e-17	6.84878e-25	6.84878e-25	8.84993e-10	1.26148e-16	1.26148e-16
Q	60	N	1.92653e-13	8.73138e-33	8.73138e-33	2.1868e-11	6.86435e-16	6.86435e-16
Q	60	Y	2.31029e-32	7.05402e-19	2.31029e-32	9.33523e-16	2.61931e-15	9.33523e-16
Q	60	D	8.92965e-16	8.05076e-22	8.05076e-22	1.2077e-14	1.47557e-12	1.2077e-14
N	61	E	2.42627e-22	2.10371e-35	2.10371e-35	1.22458e-26	2.24115e-28	2.24115e-28
N	61	Y	9.61019e-14	9.84414e-24	9.84414e-24	2.02093e-21	2.35807e-11	2.02093e-21
N	61	I	5.6337e-23	3.96942e-32	3.96942e-32	1.81368e-20	3.77683e-16	1.81368e-20
N	61	L	1.99577e-22	2.73421e-20	1.99577e-22	2.25691e-14	7.3058e-20	7.3058e-20
N	61	Q	9.73773e-37	4.64096e-27	9.73773e-37	9.76624e-19	2.72439e-14	9.76624e-19
N	61	W	9.42221e-29	1.29864e-25	9.42221e-29	7.57842e-10	5.6445e-18	5.6445e-18
N	61	P	1.88442e-22	2.01865e-20	1.88442e-22	2.69551e-12	5.66541e-17	5.66541e-17
N	61	F	3.01725e-16	1.64209e-30	1.64209e-30	1.00652e-16	1.03627e-16	1.00652e-16
N	61	C	3.50527e-22	6.16932e-19	3.50527e-22	9.50894e-13	3.35929e-16	3.35929e-16
N	61	M	6.22857e-17	3.1315e-15	6.22857e-17	8.43739e-12	1.06522e-15	1.06522e-15
N	61	T	3.1284e-20	6.02243e-17	3.1284e-20	1.4813e-15	5.6202e-13	1.4813e-15
N	61	G	2.93101e-21	1.74452e-15	2.93101e-21	5.5126e-10	5.54806e-14	5.54806e-14
N	61	R	2.29335e-16	1.39393e-20	1.39393e-20	1.76127e-13	6.43934e-07	1.76127e-13
N	61	D	2.80909e-18	2.87326e-29	2.87326e-29	1.79614e-13	5.27086e-08	1.79614e-13
N	61	A	8.56331e-19	3.23475e-26	3.23475e-26	1.86203e-09	3.70167e-13	3.70167e-13
N	61	V	6.9024e-10	2.51864e-11	2.51864e-11	1.43682e-12	1.847e-10	1.43682e-12
N	61	S	1.12974e-18	3.5338e-12	1.12974e-18	8.39309e-12	3.3897e-12	3.3897e-12
N	61	K	8.94301e-22	4.6543e-19	8.94301e-22	1.80784e-10	2.81033e-11	2.81033e-11
N	61	H	4.56285e-23	1.74729e-13	4.56285e-23	1.35624e-09	1.0389e-09	1.0389e-09
S	62	G	5.82884e-27	2.63752e-25	5.82884e-27	2.34819e-29	2.29267e-10	2.34819e-29
S	62	D	9.96905e-46	6.34079e-45	9.96905e-46	7.53386e-28	5.51643e-25	7.53386e-28
S	62	A	4.94204e-33	3.80351e-18	4.94204e-33	4.74211e-22	7.56603e-28	7.56603e-28
S	62	F	9.63207e-36	8.21519e-20	9.63207e-36	2.52835e-27	7.34161e-19	2.52835e-27
S	62	M	2.09981e-25	5.70713e-46	5.70713e-46	6.63983e-23	2.1453e-25	2.1453e-25
S	62	H	1.81998e-30	2.04589e-32	2.04589e-32	3.73361e-19	3.87749e-25	3.87749e-25
S	62	W	7.10355e-29	3.56215e-31	3.56215e-31	3.48479e-24	1.77208e-13	3.48479e-24
S	62	T	1.01073e-33	7.21563e-38	7.21563e-38	2.75615e-23	6.83245e-22	2.75615e-23
S	62	L	1.11366e-14	2.10221e-30	2.10221e-30	6.23691e-23	9.65248e-21	6.23691e-23
S	62	R	2.16433e-38	5.61464e-34	2.16433e-38	7.10067e-23	9.80385e-20	7.10067e-23
S	62	P	3.89893e-24	1.84229e-18	3.89893e-24	4.78617e-19	3.3254e-21	3.3254e-21
S	62	I	5.57841e-36	3.1176e-39	3.1176e-39	2.69402e-19	6.38447e-21	6.38447e-21
S	62	C	3.14116e-36	4.16395e-34	3.14116e-36	4.41602e-14	1.37023e-20	1.37023e-20
S	62	V	4.39687e-24	1.34509e-19	4.39687e-24	1.41265e-11	1.23558e-18	1.23558e-18
S	62	E	1.10425e-24	6.52341e-20	1.10425e-24	1.325e-09	5.39527e-18	5.39527e-18
S	62	Y	1.63702e-22	1.90566e-30	1.90566e-30	7.96342e-18	1.75408e-15	7.96342e-18
S	62	N	4.37264e-22	4.65536e-24	4.65536e-24	2.15623e-16	1.06404e-11	2.15623e-16
S	62	K	1.58318e-24	3.16682e-19	1.58318e-24	1.91333e-15	4.45436e-15	1.91333e-15
S	62	Q	3.10141e-28	5.68797e-26	3.10141e-28	2.9779e-11	2.38935e-15	2.38935e-15
Q	63	V	5.10905e-32	7.74923e-43	7.74923e-43	2.67336e-26	3.72969e-17	2.67336e-26
Q	63	N	1.33843e-22	4.10803e-31	4.10803e-31	1.87417e-14	1.01703e-25	1.01703e-25
Q	63	R	1.0981e-30	9.36714e-25	1.0981e-30	1.38271e-24	2.02304e-12	1.38271e-24
Q	63	L	2.41738e-29	9.11345e-34	9.11345e-34	1.89979e-24	1.32712e-16	1.89979e-24
Q	63	K	7.79157e-38	2.2343e-34	7.79157e-38	5.15087e-23	4.70877e-13	5.15087e-23
Q	63	E	1.42761e-29	1.88076e-17	1.42761e-29	2.83673e-22	5.85924e-16	2.83673e-22
Q	63	A	3.02523e-18	1.68826e-28	1.68826e-28	6.26424e-22	1.52475e-17	6.26424e-22
Q	63	G	1.6847e-21	1.106e-16	1.6847e-21	2.25118e-15	9.95215e-22	9.95215e-22
Q	63	W	4.30525e-19	1.66386e-19	1.66386e-19	1.31654e-21	1.03634e-15	1.31654e-21
Q	63	Y	2.39675e-14	3.96604e-16	3.96604e-16	1.04827e-20	2.07027e-14	1.04827e-20
Q	63	I	3.73243e-16	1.47775e-14	3.73243e-16	9.6559e-09	1.11105e-16	1.11105e-16
Q	63	C	4.10444e-12	5.76765e-11	4.10444e-12	1.52422e-15	3.26196e-07	1.52422e-15
Q	63	P	1.81244e-28	8.30024e-14	1.81244e-28	2.75768e-15	6.98034e-10	2.75768e-15
Q	63	H	5.41338e-27	1.23192e-18	5.41338e-27	7.76734e-15	4.44927e-12	7.76734e-15
Q	63	D	2.08503e-21	5.62119e-20	2.08503e-21	2.96814e-11	1.41599e-14	1.41599e-14
Q	63	S	8.95858e-22	3.02134e-18	8.95858e-22	5.86959e-14	8.19742e-11	5.86959e-14
Q	63	T	3.6072e-21	1.17814e-15	3.6072e-21	2.34939e-10	2.87544e-13	2.87544e-13
Q	63	M	1.66893e-26	6.56348e-17	1.66893e-26	2.79938e-11	4.75125e-13	4.75125e-13
Q	63	F	3.06179e-14	1.97539e-17	1.97539e-17	1.19907e-10	2.5692e-06	1.19907e-10
T	64	S	2.32446e-31	1.54399e-15	2.32446e-31	3.33772e-25	2.40914e-11	3.33772e-25
T	64	R	3.56273e-32	1.84733e-39	1.84733e-39	9.42475e-23	3.58754e-23	3.58754e-23
T	64	V	1.26043e-29	1.23068e-26	1.26043e-29	4.03233e-23	7.38979e-17	4.03233e-23
T	64	E	3.44121e-32	1.94836e-26	3.44121e-32	8.67348e-23	1.55932e-17	8.67348e-23
T	64	M	1.7717e-40	1.55062e-30	1.7717e-40	3.25306e-16	1.36354e-18	1.36354e-18
T	64	K	2.98779e-31	2.72897e-27	2.98779e-31	2.6739e-18	1.15206e-14	2.6739e-18
T	64	I	7.18986e-18	7.99789e-23	7.99789e-23	6.86923e-11	3.42626e-18	3.42626e-18
T	64	P	2.95242e-30	6.8955e-31	6.8955e-31	6.19328e-14	8.93394e-17	8.93394e-17
T	64	C	5.90141e-34	2.44747e-23	5.90141e-34	9.5671e-17	1.17216e-14	9.5671e-17
T	64	Q	1.201e-24	3.02019e-36	3.02019e-36	1.80929e-16	9.58301e-17	9.58301e-17
T	64	H	6.46472e-28	7.90263e-16	6.46472e-28	3.42136e-15	1.25371e-16	1.25371e-16
T	64	Y	8.18751e-26	6.58233e-32	6.58233e-32	1.77075e-11	8.77366e-16	8.77366e-16
T	64	D	1.3893e-19	9.12431e-18	1.3893e-19	1.89294e-11	2.08427e-15	2.08427e-15
T	64	A	1.88547e-24	9.21645e-26	9.21645e-26	6.40538e-15	2.19003e-13	6.40538e-15
T	64	W	1.22349e-23	8.01885e-13	1.22349e-23	2.12753e-14	3.41373e-14	2.12753e-14
T	64	L	6.34211e-28	4.33612e-29	4.33612e-29	5.81574e-12	4.54523e-14	4.54523e-14
T	64	G	1.04852e-18	9.89278e-15	1.04852e-18	4.50936e-10	2.58608e-11	2.58608e-11
T	64	F	2.76243e-14	3.40754e-15	3.40754e-15	8.01213e-11	0.000437668	8.01213e-11
T	64	N	4.13177e-16	2.43352e-29	2.43352e-29	3.03963e-10	6.4053e-09	3.03963e-10
H	65	S	1.70107e-42	8.32995e-32	1.70107e-42	1.51316e-21	6.55961e-32	6.55961e-32
H	65	G	4.51494e-29	1.09249e-31	1.09249e-31	1.21964e-28	3.58238e-16	1.21964e-28
H	65	R	9.39818e-30	4.6312e-27	9.39818e-30	1.25358e-28	6.1457e-16	1.25358e-28
H	65	Q	1.41943e-44	8.13598e-48	8.13598e-48	2.34175e-21	1.92407e-28	1.92407e-28
H	65	T	1.9156e-41	5.07551e-37	1.9156e-41	2.66731e-28	7.57863e-23	2.66731e-28
H	65	V	1.21177e-26	4.30101e-18	1.21177e-26	1.22932e-25	8.0148e-19	1.22932e-25
H	65	D	9.47693e-34	1.36084e-30	9.47693e-34	1.23981e-25	2.07618e-24	1.23981e-25
H	65	N	1.75218e-31	2.29789e-34	2.29789e-34	5.84808e-18	2.05706e-25	2.05706e-25
H	65	A	5.6993e-27	1.02936e-41	1.02936e-41	2.3946e-25	1.89125e-16	2.3946e-25
H	65	I	8.87881e-31	7.35029e-31	7.35029e-31	1.06899e-24	7.54508e-23	1.06899e-24
H	65	F	7.54387e-30	1.32961e-27	7.54387e-30	5.65946e-24	2.32896e-20	5.65946e-24
H	65	P	4.44482e-26	8.20572e-29	8.20572e-29	1.5042e-23	4.11736e-22	1.5042e-23
H	65	M	4.16846e-33	4.87254e-36	4.87254e-36	2.47819e-19	4.74067e-23	4.74067e-23
H	65	Y	2.09797e-20	2.89351e-25	2.89351e-25	3.38752e-22	1.61159e-16	3.38752e-22
H	65	W	1.97046e-20	9.24977e-26	9.24977e-26	1.49217e-21	1.42289e-14	1.49217e-21
H	65	K	3.43171e-30	1.24541e-25	3.43171e-30	1.12082e-19	1.67897e-16	1.12082e-19
H	65	L	2.36683e-39	3.35097e-38	2.36683e-39	1.24296e-18	3.88732e-19	3.88732e-19
H	65	C	3.28011e-25	1.09166e-26	1.09166e-26	1.48134e-16	9.41833e-14	1.48134e-16
H	65	E	2.26205e-28	4.91802e-24	2.26205e-28	3.27595e-16	1.3054e-09	3.27595e-16
Q	66	V	5.11157e-31	1.02104e-26	5.11157e-31	2.13268e-29	1.9644e-19	2.13268e-29
Q	66	D	5.3816e-30	5.0136e-29	5.3816e-30	7.14342e-29	1.75789e-22	7.14342e-29
Q	66	C	5.252e-21	4.34636e-17	5.252e-21	2.09746e-27	9.22576e-23	2.09746e-27
Q	66	A	1.44389e-29	1.70651e-27	1.44389e-29	1.14248e-26	1.09845e-15	1.14248e-26
Q	66	P	7.38707e-23	4.42952e-27	4.42952e-27	6.44834e-21	8.45049e-26	8.45049e-26
Q	66	E	6.15612e-26	1.38794e-33	1.38794e-33	4.47596e-24	6.02815e-15	4.47596e-24
Q	66	F	4.39505e-23	7.42606e-31	7.42606e-31	1.34653e-22	4.77063e-21	1.34653e-22
Q	66	N	2.91299e-19	3.81977e-21	3.81977e-21	3.77759e-14	6.32209e-20	6.32209e-20
Q	66	M	2.84875e-13	1.16875e-17	1.16875e-17	4.09036e-19	1.66672e-11	4.09036e-19
Q	66	W	4.0296e-10	2.2315e-11	2.2315e-11	5.17677e-19	1.06076e-11	5.17677e-19
Q	66	G	1.27498e-22	2.80424e-40	2.80424e-40	9.4937e-12	1.48945e-18	1.48945e-18
Q	66	R	1.32057e-23	4.22781e-30	4.22781e-30	2.15231e-18	7.38475e-13	2.15231e-18
Q	66	H	9.04987e-21	5.91955e-23	5.91955e-23	5.96398e-18	3.21403e-13	5.96398e-18
Q	66	K	7.89716e-28	7.59322e-17	7.89716e-28	3.20602e-16	1.02274e-16	1.02274e-16
Q	66	Y	6.39249e-19	2.64307e-10	6.39249e-19	2.47663e-14	2.96678e-15	2.96678e-15
Q	66	S	5.06362e-14	4.02347e-26	4.02347e-26	5.05234e-11	3.19838e-15	3.19838e-15
Q	66	L	2.12427e-29	1.87282e-21	2.12427e-29	3.21587e-15	1.69523e-14	3.21587e-15
Q	66	I	5.07108e-10	3.25141e-14	3.25141e-14	4.70729e-14	1.92087e-14	1.92087e-14
Q	66	T	1.88185e-16	1.54812e-28	1.54812e-28	5.74126e-14	2.24005e-09	5.74126e-14
A	67	G	1.74989e-19	4.34414e-21	4.34414e-21	5.2945e-28	2.07835e-12	5.2945e-28
A	67	H	5.45355e-18	9.577e-19	9.577e-19	3.64862e-16	2.42713e-27	2.42713e-27
A	67	T	5.92021e-34	2.09608e-18	5.92021e-34	4.6377e-21	2.92589e-27	2.92589e-27
A	67	Y	2.40255e-19	1.04012e-24	1.04012e-24	1.02256e-24	2.11812e-11	1.02256e-24
A	67	E	1.78805e-23	2.10466e-22	1.78805e-23	1.6311e-14	1.06019e-24	1.06019e-24
A	67	C	9.15938e-19	7.80873e-25	7.80873e-25	5.75403e-24	8.44433e-21	5.75403e-24
A	67	D	1.91432e-26	2.92681e-20	1.91432e-26	2.88025e-14	4.03655e-22	4.03655e-22
A	67	R	3.66785e-30	1.02533e-20	3.66785e-30	1.42923e-21	1.82146e-18	1.42923e-21
A	67	Q	4.28894e-25	3.52435e-29	3.52435e-29	2.94854e-18	1.17015e-20	1.17015e-20
A	67	L	2.7491e-19	4.37641e-24	4.37641e-24	1.86491e-20	5.02078e-19	1.86491e-20
A	67	N	4.53275e-25	6.11051e-25	4.53275e-25	1.1561e-18	3.28951e-19	3.28951e-19
A	67	W	1.03067e-14	2.4089e-13	1.03067e-14	3.34224e-17	5.23623e-16	3.34224e-17
A	67	I	9.79085e-14	1.93081e-31	1.93081e-31	2.65298e-12	4.36351e-17	4.36351e-17
A	67	P	1.49739e-16	5.31198e-42	5.31198e-42	5.94546e-17	1.06903e-16	5.94546e-17
A	67	S	1.11379e-27	1.18987e-28	1.18987e-28	1.09912e-13	6.43034e-17	6.43034e-17
A	67	V	8.31932e-20	1.19317e-25	1.19317e-25	5.4539e-16	1.00297e-13	5.4539e-16
A	67	F	7.9639e-22	2.01418e-11	7.9639e-22	6.04355e-16	1.24049e-12	6.04355e-16
A	67	K	1.13957e-16	8.62601e-16	1.13957e-16	9.90141e-15	7.70293e-11	9.90141e-15
A	67	M	2.34266e-25	3.79283e-20	2.34266e-25	7.47976e-14	2.43475e-12	7.47976e-14
S	68	P	1.43547e-21	3.96535e-22	3.96535e-22	5.53167e-27	1.98002e-23	5.53167e-27
S	68	D	1.09704e-26	3.57641e-19	1.09704e-26	2.89869e-21	2.03911e-10	2.89869e-21
S	68	G	1.1396e-23	2.7423e-27	2.7423e-27	5.09938e-14	9.58597e-21	9.58597e-21
S	68	I	4.18135e-14	1.64856e-15	1.64856e-15	5.75876e-20	1.15592e-18	5.75876e-20
S	68	F	3.95879e-20	8.65288e-22	8.65288e-22	6.20752e-20	3.71534e-16	6.20752e-20
S	68	E	1.44745e-30	2.83009e-24	1.44745e-30	3.15181e-14	3.4301e-19	3.4301e-19
S	68	M	3.30479e-19	7.33837e-17	3.30479e-19	1.10702e-18	2.51299e-09	1.10702e-18
S	68	W	2.18963e-15	6.93703e-16	6.93703e-16	4.28831e-18	8.03292e-10	4.28831e-18
S	68	T	2.27621e-25	1.6148e-20	2.27621e-25	8.05656e-15	1.2211e-17	1.2211e-17
S	68	R	3.127e-26	9.45186e-18	3.127e-26	8.31612e-12	2.45047e-17	2.45047e-17
S	68	C	1.26584e-17	3.38089e-19	3.38089e-19	1.09344e-15	5.71752e-16	5.71752e-16
S	68	Y	3.79116e-12	1.39695e-10	3.79116e-12	2.12986e-11	5.86277e-16	5.86277e-16
S	68	A	1.35939e-19	2.46743e-16	1.35939e-19	1.17414e-15	1.64555e-10	1.17414e-15
S	68	K	1.11739e-29	9.4641e-15	1.11739e-29	1.50044e-15	5.90204e-12	1.50044e-15
S	68	L	3.835e-14	3.01855e-15	3.01855e-15	2.99549e-12	2.32925e-15	2.32925e-15
S	68	H	2.85734e-21	3.10956e-17	2.85734e-21	5.33076e-14	4.04413e-15	4.04413e-15
S	68	Q	1.77119e-14	5.34656e-18	5.34656e-18	2.19766e-11	4.33013e-13	4.33013e-13
S	68	N	3.62599e-24	2.24042e-18	3.62599e-24	5.74791e-13	4.26986e-11	5.74791e-13
S	68	V	3.11378e-20	3.34918e-13	3.11378e-20	2.96829e-11	4.10736e-08	2.96829e-11
L	69	D	7.89377e-29	2.37507e-29	2.37507e-29	1.12309e-32	6.72895e-15	1.12309e-32
L	69	E	1.1337e-23	3.37819e-21	1.1337e-23	7.89582e-18	6.07351e-25	6.07351e-25
L	69	M	2.0169e-20	2.46295e-24	2.46295e-24	8.96104e-24	1.11136e-20	8.96104e-24
L	69	G	4.89779e-30	3.27264e-38	3.27264e-38	8.40219e-22	1.29956e-23	1.29956e-23
L	69	R	3.85914e-22	4.70765e-22	3.85914e-22	2.51266e-21	6.88907e-13	2.51266e-21
L	69	Q	1.91751e-30	2.71287e-21	1.91751e-30	1.17113e-20	1.21989e-17	1.17113e-20
L	69	Y	1.52709e-19	1.10362e-19	1.10362e-19	4.50973e-15	1.80549e-20	1.80549e-20
L	69	N	5.62495e-34	1.77027e-34	1.77027e-34	2.97526e-20	5.25556e-12	2.97526e-20
L	69	P	5.67557e-22	1.15517e-22	1.15517e-22	3.56003e-19	5.4616e-14	3.56003e-19
L	69	T	1.90064e-28	1.20404e-40	1.20404e-40	3.36148e-18	6.68587e-19	6.68587e-19
L	69	C	2.38497e-18	5.84498e-20	5.84498e-20	9.41429e-19	6.339e-12	9.41429e-19
L	69	V	2.90092e-17	1.24356e-16	2.90092e-17	1.21308e-18	8.03689e-17	1.21308e-18
L	69	W	5.6404e-27	1.09455e-15	5.6404e-27	1.91231e-18	4.13951e-15	1.91231e-18
L	69	I	2.88394e-27	2.91315e-27	2.88394e-27	2.3318e-17	1.30381e-14	2.3318e-17
L	69	H	1.44554e-23	1.4226e-14	1.44554e-23	1.18129e-16	1.33174e-13	1.18129e-16
L	69	S	1.63712e-13	1.64141e-13	1.63712e-13	1.23029e-14	3.54008e-16	3.54008e-16
L	69	A	2.67692e-27	2.36309e-29	2.36309e-29	2.37859e-15	7.65187e-13	2.37859e-15
L	69	F	8.89312e-24	3.36633e-26	3.36633e-26	5.73968e-14	2.75833e-14	2.75833e-14
L	69	K	1.89319e-20	1.46618e-17	1.89319e-20	4.74511e-11	2.99224e-10	4.74511e-11
S	70	Y	4.46138e-21	1.38305e-16	4.46138e-21	2.91284e-40	4.87526e-14	2.91284e-40
S	70	P	9.37299e-42	4.78554e-30	9.37299e-42	1.67333e-26	1.68293e-19	1.67333e-26
S	70	Q	2.62255e-38	2.47484e-33	2.62255e-38	2.63363e-26	3.21493e-17	2.63363e-26
S	70	A	2.31565e-30	3.74697e-39	3.74697e-39	1.29476e-22	1.17113e-24	1.17113e-24
S	70	R	1.7344e-23	1.3695e-15	1.7344e-23	6.99216e-24	7.99651e-16	6.99216e-24
S	70	L	3.73286e-34	7.64142e-23	3.73286e-34	1.44381e-15	1.1687e-21	1.1687e-21
S	70	D	4.59392e-34	1.51525e-31	4.59392e-34	1.51086e-21	3.86217e-20	1.51086e-21
S	70	G	1.64444e-29	9.93236e-33	9.93236e-33	3.89238e-21	1.06689e-18	3.89238e-21
S	70	C	4.04216e-24	6.40129e-28	6.40129e-28	4.67644e-20	1.08262e-16	4.67644e-20
S	70	K	1.23643e-23	2.45994e-25	2.45994e-25	6.09739e-20	2.27638e-15	6.09739e-20
S	70	M	5.55506e-23	3.42511e-22	5.55506e-23	1.44463e-19	2.67194e-14	1.44463e-19
S	70	E	1.08349e-20	8.45684e-22	8.45684e-22	2.64911e-19	2.40153e-09	2.64911e-19
S	70	H	1.20621e-34	2.71696e-34	1.20621e-34	4.26813e-19	1.08782e-14	4.26813e-19
S	70	V	3.47822e-25	1.35908e-18	3.47822e-25	2.63372e-16	6.00475e-18	6.00475e-18
S	70	I	1.27765e-22	2.68152e-25	2.68152e-25	1.26252e-16	1.46148e-17	1.46148e-17
S	70	T	3.31189e-32	3.19004e-28	3.31189e-32	2.68225e-17	1.7919e-14	2.68225e-17
S	70	N	2.68168e-25	7.22931e-22	2.68168e-25	4.88425e-17	1.6604e-12	4.88425e-17
S	70	W	7.69758e-26	1.89209e-21	7.69758e-26	1.3939e-16	1.43708e-08	1.3939e-16
S	70	F	4.10963e-26	4.93954e-20	4.10963e-26	7.85408e-16	7.14316e-13	7.85408e-16
K	71	G	2.54048e-35	6.71424e-32	2.54048e-35	1.06554e-27	1.95392e-19	1.06554e-27
K	71	N	8.9565e-43	5.04343e-27	8.9565e-43	7.61113e-25	6.13529e-18	7.61113e-25
K	71	A	7.1484e-34	2.28767e-40	2.28767e-40	1.52093e-24	7.36169e-18	1.52093e-24
K	71	T	9.69193e-37	5.43586e-31	9.69193e-37	5.84809e-22	4.29235e-22	4.29235e-22
K	71	Q	9.17529e-20	3.66631e-39	3.66631e-39	1.32826e-21	2.93051e-16	1.32826e-21
K	71	P	6.12586e-18	1.50615e-13	6.12586e-18	4.74858e-16	1.33489e-21	1.33489e-21
K	71	S	2.41071e-31	2.22696e-30	2.41071e-31	6.73907e-21	1.39353e-09	6.73907e-21
K	71	C	1.05761e-35	1.52969e-29	1.05761e-35	2.86877e-20	9.97857e-18	2.86877e-20
K	71	V	1.8225e-29	1.5583e-23	1.8225e-29	2.95746e-19	4.67051e-15	2.95746e-19
K	71	L	4.38034e-20	5.52048e-19	4.38034e-20	4.27041e-18	4.54683e-18	4.27041e-18
K	71	R	1.08284e-20	1.93193e-27	1.93193e-27	1.1527e-17	8.44608e-16	1.1527e-17
K	71	M	2.32006e-27	8.78604e-27	2.32006e-27	1.74248e-16	5.40238e-13	1.74248e-16
K	71	W	1.80538e-18	2.06383e-15	1.80538e-18	1.22771e-13	1.79331e-15	1.79331e-15
K	71	H	3.18464e-20	4.19418e-18	3.18464e-20	1.00784e-14	2.93759e-09	1.00784e-14
K	71	E	6.4143e-25	4.0636e-14	6.4143e-25	1.07784e-14	7.9083e-10	1.07784e-14
K	71	Y	1.02344e-21	1.1028e-17	1.02344e-21	8.05015e-12	2.8671e-14	2.8671e-14
K	71	F	3.32404e-22	7.3583e-16	3.32404e-22	5.90501e-14	4.90838e-10	5.90501e-14
K	71	I	8.73738e-20	1.18192e-15	8.73738e-20	2.9523e-11	9.19157e-14	9.19157e-14
K	71	D	6.44459e-17	9.18506e-12	6.44459e-17	2.90408e-07	8.94417e-06	2.90408e-07
Q	72	G	3.96409e-17	1.96804e-21	1.96804e-21	3.47574e-34	3.68591e-14	3.47574e-34
Q	72	T	4.93199e-35	4.04696e-31	4.93199e-35	4.84237e-31	1.66778e-23	4.84237e-31
Q	72	N	3.40029e-27	4.55337e-25	3.40029e-27	8.65514e-29	1.88757e-12	8.65514e-29
Q	72	K	1.91995e-27	1.5428e-14	1.91995e-27	5.46638e-27	1.62155e-12	5.46638e-27
Q	72	I	1.61391e-17	8.24869e-15	1.61391e-17	4.50518e-16	4.64849e-25	4.64849e-25
Q	72	C	4.15472e-13	6.10122e-24	6.10122e-24	1.35842e-18	2.11436e-22	2.11436e-22
Q	72	E	1.77084e-21	9.13258e-18	1.77084e-21	1.55799e-21	1.28401e-11	1.55799e-21
Q	72	H	1.65889e-29	1.32697e-13	1.65889e-29	3.3209e-20	2.33411e-12	3.3209e-20
Q	72	L	2.19546e-35	8.01748e-29	2.19546e-35	5.10345e-18	2.10256e-19	2.10256e-19
Q	72	A	5.47091e-18	4.60547e-20	4.60547e-20	2.55559e-19	7.53178e-13	2.55559e-19
Q	72	W	2.07154e-16	5.88273e-15	2.07154e-16	5.18672e-14	3.62407e-18	3.62407e-18
Q	72	S	1.17745e-19	1.78199e-13	1.17745e-19	3.64327e-18	4.35701e-11	3.64327e-18
Q	72	V	1.28938e-12	2.9808e-19	2.9808e-19	3.59379e-17	1.07626e-17	1.07626e-17
Q	72	D	3.38708e-19	8.55562e-26	8.55562e-26	4.96463e-17	4.34988e-11	4.96463e-17
Q	72	P	3.97493e-21	3.62482e-11	3.97493e-21	6.86156e-16	1.80173e-16	1.80173e-16
Q	72	R	1.99777e-10	5.98425e-15	5.98425e-15	4.35566e-16	9.72594e-12	4.35566e-16
Q	72	M	8.43522e-18	2.29168e-16	8.43522e-18	2.75625e-12	7.75303e-16	7.75303e-16
Q	72	Y	1.42665e-16	3.85974e-13	1.42665e-16	2.09881e-13	9.99097e-08	2.09881e-13
Q	72	F	1.24004e-17	7.54022e-16	1.24004e-17	3.90674e-06	7.09709e-11	7.09709e-11
P	73	N	1.92018e-31	1.08535e-28	1.92018e-31	6.19079e-32	2.74703e-10	6.19079e-32
P	73	Q	2.37586e-41	2.44041e-48	2.44041e-48	4.29133e-28	3.58479e-22	4.29133e-28
P	73	I	8.74112e-35	1.46587e-21	8.74112e-35	3.82612e-23	8.02603e-26	8.02603e-26
P	73	R	4.95147e-29	2.12222e-29	2.12222e-29	3.68672e-20	3.43896e-25	3.43896e-25
P	73	V	3.40299e-36	9.05355e-38	9.05355e-38	5.23731e-24	7.4129e-25	7.4129e-25
P	73	E	2.51277e-44	2.41694e-38	2.51277e-44	2.87271e-24	2.10306e-16	2.87271e-24
P	73	L	7.20587e-41	8.8421e-22	7.20587e-41	2.88242e-24	1.30403e-15	2.88242e-24
P	73	W	3.31057e-25	3.41802e-17	3.31057e-25	1.60007e-21	5.88618e-21	1.60007e-21
P	73	T	1.13666e-37	3.68394e-22	1.13666e-37	5.68283e-20	2.60518e-11	5.68283e-20
P	73	H	3.69278e-21	1.28328e-26	1.28328e-26	1.0861e-10	9.19124e-20	9.19124e-20
P	73	G	1.69427e-18	1.37063e-25	1.37063e-25	1.47478e-18	9.89392e-20	9.89392e-20
P	73	K	7.19251e-28	2.05923e-32	2.05923e-32	2.34294e-19	1.46222e-19	1.46222e-19
P	73	C	5.86101e-34	6.68844e-34	5.86101e-34	2.53982e-18	5.06744e-15	2.53982e-18
P	73	M	1.301e-14	9.11354e-15	9.11354e-15	7.42322e-17	3.55793e-13	7.42322e-17
P	73	F	2.38565e-22	7.81645e-20	2.38565e-22	7.55635e-17	9.59053e-17	7.55635e-17
P	73	A	6.02359e-27	2.1491e-33	2.1491e-33	4.66937e-15	4.13135e-14	4.66937e-15
P	73	D	1.0503e-20	1.76365e-35	1.76365e-35	1.37667e-14	1.05727e-09	1.37667e-14
P	73	S	9.88245e-27	1.17223e-26	9.88245e-27	1.08531e-13	1.43151e-13	1.08531e-13
P	73	Y	1.42414e-20	5.50723e-18	1.42414e-20	7.23564e-09	1.13593e-12	1.13593e-12
T	74	C	3.564e-32	1.31731e-27	3.564e-32	5.94186e-38	1.60571e-14	5.94186e-38
T	74	M	1.21156e-28	2.94907e-23	1.21156e-28	5.73477e-35	5.66404e-19	5.73477e-35
T	74	E	1.38357e-30	2.5412e-21	1.38357e-30	6.3689e-33	1.20184e-12	6.3689e-33
T	74	D	1.67225e-44	4.56439e-34	1.67225e-44	3.0785e-29	9.32094e-17	3.0785e-29
T	74	P	1.68858e-38	2.12895e-32	1.68858e-38	4.72221e-28	1.87497e-27	4.72221e-28
T	74	F	1.33266e-23	2.04321e-33	2.04321e-33	3.37312e-27	3.77402e-18	3.37312e-27
T	74	K	2.81065e-21	6.15683e-29	6.15683e-29	3.2473e-25	6.89791e-13	3.2473e-25
T	74	I	3.97996e-32	6.26688e-25	3.97996e-32	4.40156e-25	5.42011e-12	4.40156e-25
T	74	V	1.3285e-26	4.19146e-29	4.19146e-29	4.37482e-18	2.85537e-23	2.85537e-23
T	74	H	1.99658e-24	1.79326e-25	1.79326e-25	5.69591e-23	9.79691e-21	5.69591e-23
T	74	Y	1.0718e-27	6.06298e-26	1.0718e-27	2.06274e-19	6.3861e-23	6.3861e-23
T	74	Q	7.80518e-25	1.20742e-29	1.20742e-29	4.14569e-16	1.22014e-20	1.22014e-20
T	74	A	1.41623e-45	2.60916e-36	1.41623e-45	1.28938e-20	8.22063e-15	1.28938e-20
T	74	W	1.21984e-15	1.37102e-31	1.37102e-31	1.75933e-19	2.47973e-14	1.75933e-19
T	74	N	1.21863e-38	7.17562e-53	7.17562e-53	4.18972e-18	3.77311e-10	4.18972e-18
T	74	G	6.84313e-22	4.65836e-28	4.65836e-28	1.49226e-16	1.72983e-14	1.49226e-16
T	74	S	1.07657e-39	7.05823e-26	1.07657e-39	1.8191e-16	4.71172e-15	1.8191e-16
T	74	R	1.56724e-31	1.19755e-21	1.56724e-31	7.02212e-15	7.97454e-12	7.02212e-15
T	74	L	5.5947e-27	2.88928e-20	5.5947e-27	1.41013e-14	2.26309e-14	1.41013e-14
S	75	H	9.62361e-29	4.57795e-37	4.57795e-37	4.32241e-31	1.45211e-21	4.32241e-31
S	75	M	4.96956e-36	1.63507e-35	4.96956e-36	1.1523e-18	9.89062e-30	9.89062e-30
S	75	G	3.96155e-26	1.45954e-22	3.96155e-26	2.47899e-28	6.20414e-21	2.47899e-28
S	75	Q	1.52778e-24	9.298e-31	9.298e-31	3.711e-27	8.27353e-14	3.711e-27
S	75	K	1.11854e-22	3.36848e-26	3.36848e-26	4.15141e-21	7.07945e-27	7.07945e-27
S	75	Y	1.95914e-28	3.98896e-35	3.98896e-35	3.89403e-21	2.02785e-26	2.02785e-26
S	75	I	8.77047e-29	4.19249e-43	4.19249e-43	2.6881e-25	6.90323e-19	2.6881e-25
S	75	C	3.17508e-29	3.60173e-20	3.17508e-29	8.56956e-17	5.08815e-23	5.08815e-23
S	75	T	5.06388e-35	8.13303e-35	5.06388e-35	2.0279e-21	3.49686e-13	2.0279e-21
S	75	F	1.094e-29	1.42892e-27	1.094e-29	2.10572e-21	1.21573e-12	2.10572e-21
S	75	E	2.77987e-39	1.59835e-51	1.59835e-51	8.67797e-20	7.87199e-21	7.87199e-21
S	75	D	9.10533e-35	8.30427e-16	9.10533e-35	9.98724e-21	1.65999e-08	9.98724e-21
S	75	L	2.32195e-27	2.36668e-31	2.36668e-31	1.29755e-19	1.17156e-17	1.29755e-19
S	75	V	1.69139e-32	1.32087e-45	1.32087e-45	2.81718e-19	1.53036e-13	2.81718e-19
S	75	W	5.58944e-21	1.61873e-19	5.58944e-21	1.5684e-18	3.52726e-15	1.5684e-18
S	75	P	2.07634e-31	1.8542e-32	1.8542e-32	3.86269e-17	5.58168e-15	3.86269e-17
S	75	N	2.26798e-30	5.26511e-25	2.26798e-30	1.04184e-16	1.00281e-13	1.04184e-16
S	75	A	6.98025e-21	8.02086e-19	6.98025e-21	2.05931e-16	2.56351e-13	2.05931e-16
S	75	R	5.32104e-17	2.53839e-28	2.53839e-28	7.77364e-15	5.03317e-10	7.77364e-15
Q	76	L	3.93066e-18	1.26464e-21	1.26464e-21	4.83118e-27	2.3193e-14	4.83118e-27
Q	76	N	2.54976e-31	2.64253e-32	2.64253e-32	1.94949e-23	2.58985e-21	1.94949e-23
Q	76	S	2.37873e-32	7.75335e-37	7.75335e-37	5.97641e-23	1.5788e-12	5.97641e-23
Q	76	R	8.9606e-08	6.32266e-14	6.32266e-14	1.30014e-21	3.05317e-08	1.30014e-21
Q	76	H	1.0965e-23	2.64426e-21	1.0965e-23	1.62134e-20	4.12116e-18	1.62134e-20
Q	76	T	1.51665e-38	4.92861e-37	1.51665e-38	1.79538e-20	3.13175e-17	1.79538e-20
Q	76	F	9.40258e-22	8.2189e-26	8.2189e-26	1.07228e-19	8.2235e-14	1.07228e-19
Q	76	E	2.08965e-21	1.59394e-18	2.08965e-21	8.43064e-19	4.99323e-13	8.43064e-19
Q	76	A	3.90983e-23	2.84253e-31	2.84253e-31	2.10591e-18	2.45532e-18	2.10591e-18
Q	76	Y	5.90165e-29	1.41803e-29	1.41803e-29	4.9372e-16	8.08517e-13	4.9372e-16
Q	76	M	1.03206e-14	1.11932e-22	1.11932e-22	2.0197e-15	3.44635e-14	2.0197e-15
Q	76	P	9.04898e-20	4.13624e-16	9.04898e-20	3.13581e-15	2.46083e-14	3.13581e-15
Q	76	I	3.78367e-21	2.01859e-19	3.78367e-21	1.58552e-12	1.00751e-14	1.00751e-14
Q	76	V	1.2522e-14	4.72786e-11	1.2522e-14	3.22416e-14	7.88485e-07	3.22416e-14
Q	76	D	1.28443e-17	1.25529e-19	1.25529e-19	6.25222e-12	3.22582e-07	6.25222e-12
Q	76	C	7.75783e-32	1.61382e-24	7.75783e-32	3.01824e-11	1.14129e-11	1.14129e-11
Q	76	K	6.60886e-21	6.89373e-18	6.60886e-21	1.37745e-09	8.13667e-08	1.37745e-09
Q	76	G	9.09397e-18	7.2254e-10	9.09397e-18	3.45447e-08	6.5111e-05	3.45447e-08
Q	76	W	4.08026e-11	1.30667e-10	4.08026e-11	1.32605e-07	3.85099e-08	3.85099e-08
S	77	D	3.46786e-27	2.4186e-24	3.46786e-27	2.79822e-42	3.94406e-15	2.79822e-42
S	77	A	1.22093e-51	3.16062e-40	1.22093e-51	2.59069e-39	2.80394e-24	2.59069e-39
S	77	P	1.42657e-45	3.98523e-27	1.42657e-45	1.19023e-34	2.64268e-22	1.19023e-34
S	77	H	3.11003e-48	6.93631e-48	3.11003e-48	9.65962e-32	9.01823e-18	9.65962e-32
S	77	I	7.59588e-31	5.35486e-26	7.59588e-31	9.0273e-30	2.62922e-20	9.0273e-30
S	77	Q	2.1517e-31	1.31967e-24	2.1517e-31	1.10146e-29	1.59258e-22	1.10146e-29
S	77	M	7.95453e-35	7.80274e-35	7.80274e-35	3.72711e-27	3.31805e-14	3.72711e-27
S	77	V	1.71527e-20	1.71563e-24	1.71563e-24	4.892e-27	3.91082e-15	4.892e-27
S	77	L	1.67632e-42	3.34109e-37	1.67632e-42	2.60793e-25	7.64708e-27	7.64708e-27
S	77	E	1.36765e-42	8.35752e-40	1.36765e-42	2.99675e-20	1.78552e-21	1.78552e-21
S	77	G	2.83482e-31	9.2592e-29	2.83482e-31	1.15491e-12	4.54956e-19	4.54956e-19
S	77	K	4.51836e-26	2.87121e-28	2.87121e-28	4.45992e-12	1.18076e-18	1.18076e-18
S	77	F	8.41547e-28	2.62104e-34	2.62104e-34	2.03203e-16	3.08781e-17	3.08781e-17
S	77	N	6.06375e-50	2.60571e-23	6.06375e-50	3.61659e-17	1.46583e-08	3.61659e-17
S	77	T	3.60102e-27	4.58441e-22	3.60102e-27	4.56185e-17	2.19844e-15	4.56185e-17
S	77	R	1.63657e-33	4.61317e-23	1.63657e-33	1.39273e-14	1.82314e-15	1.82314e-15
S	77	W	4.74515e-24	1.0075e-22	4.74515e-24	2.256e-15	2.08298e-15	2.08298e-15
S	77	C	1.24987e-27	9.24717e-17	1.24987e-27	8.81024e-12	2.48307e-09	8.81024e-12
S	77	Y	4.09378e-31	5.50932e-14	4.09378e-31	2.35394e-10	1.76212e-09	2.35394e-10
R	78	A	6.46982e-65	2.0007e-64	6.46982e-65	1.35138e-43	1.43997e-26	1.35138e-43
R	78	H	1.95112e-55	1.16273e-41	1.95112e-55	6.5061e-42	2.2455e-31	6.5061e-42
R	78	T	4.87796e-43	2.10276e-25	4.87796e-43	1.76799e-35	1.51119e-20	1.76799e-35
R	78	L	1.91601e-39	2.97888e-31	1.91601e-39	1.90965e-34	1.40059e-25	1.90965e-34
R	78	Q	7.33032e-41	2.70478e-37	7.33032e-41	2.97379e-34	9.64114e-22	2.97379e-34
R	78	G	7.19753e-31	1.66429e-38	1.66429e-38	8.17147e-33	1.20552e-14	8.17147e-33
R	78	K	1.2566e-36	9.40678e-28	1.2566e-36	5.58891e-32	8.63543e-23	5.58891e-32
R	78	M	9.13207e-42	2.77853e-33	9.13207e-42	1.70558e-31	2.20226e-23	1.70558e-31
R	78	Y	1.30794e-24	6.46102e-30	6.46102e-30	8.66066e-31	9.85767e-24	8.66066e-31
R	78	S	5.37074e-57	2.09151e-51	5.37074e-57	4.00793e-30	1.21431e-22	4.00793e-30
R	78	E	3.13547e-34	5.98825e-37	5.98825e-37	6.79159e-29	7.2205e-29	6.79159e-29
R	78	P	6.7304e-27	8.70724e-38	8.70724e-38	8.75803e-29	3.47628e-24	8.75803e-29
R	78	N	4.7054e-47	4.59743e-73	4.59743e-73	1.82389e-25	1.04704e-28	1.04704e-28
R	78	C	7.48677e-33	1.94098e-37	1.94098e-37	2.27436e-28	1.33698e-23	2.27436e-28
R	78	W	3.76834e-34	5.28975e-31	3.76834e-34	5.61002e-28	4.30025e-14	5.61002e-28
R	78	I	9.8723e-25	1.76037e-24	9.8723e-25	4.2913e-21	5.85647e-26	5.85647e-26
R	78	D	8.16804e-42	1.32291e-44	1.32291e-44	3.32538e-22	5.66522e-25	5.66522e-25
R	78	V	8.23362e-27	2.31415e-27	2.31415e-27	6.71549e-20	8.47306e-21	8.47306e-21
R	78	F	1.72011e-13	8.59164e-18	8.59164e-18	9.91181e-07	1.57031e-10	1.57031e-10
G	79	N	8.95141e-30	4.43487e-38	4.43487e-38	3.19853e-41	3.93232e-37	3.19853e-41
G	79	S	2.2811e-45	3.49104e-44	2.2811e-45	1.82645e-38	1.65117e-27	1.82645e-38
G	79	C	2.2367e-30	1.01301e-44	1.01301e-44	6.69652e-36	4.21655e-22	6.69652e-36
G	79	Q	4.65753e-34	2.54244e-37	2.54244e-37	3.0012e-34	3.01544e-33	3.0012e-34
G	79	A	3.87582e-31	1.34115e-48	1.34115e-48	3.31e-33	8.11807e-24	3.31e-33
G	79	K	4.25813e-26	3.66795e-44	3.66795e-44	2.45651e-32	8.79973e-19	2.45651e-32
G	79	R	5.87538e-31	2.94518e-22	5.87538e-31	1.55283e-31	2.36625e-14	1.55283e-31
G	79	H	5.60608e-41	2.06891e-47	2.06891e-47	2.82736e-27	1.29339e-21	2.82736e-27
G	79	I	1.16587e-31	3.80608e-24	1.16587e-31	6.82148e-26	5.05975e-27	5.05975e-27
G	79	T	1.01813e-26	5.88152e-32	5.88152e-32	5.76549e-27	3.39489e-19	5.76549e-27
G	79	D	3.3261e-34	1.27764e-33	3.3261e-34	1.26898e-26	1.19095e-18	1.26898e-26
G	79	W	2.14406e-18	3.23544e-20	3.23544e-20	1.7158e-26	1.06096e-10	1.7158e-26
G	79	Y	1.4484e-26	3.75645e-33	3.75645e-33	2.83734e-26	1.01476e-17	2.83734e-26
G	79	L	5.47857e-31	1.6107e-39	1.6107e-39	7.48272e-21	6.75259e-25	6.75259e-25
G	79	E	1.94313e-27	8.31452e-38	8.31452e-38	9.04968e-24	1.99385e-19	9.04968e-24
G	79	M	3.35023e-34	7.43158e-30	3.35023e-34	1.87695e-23	3.75691e-19	1.87695e-23
G	79	V	4.06773e-29	9.87343e-25	4.06773e-29	4.27416e-23	7.95581e-23	4.27416e-23
G	79	F	9.38676e-22	2.64606e-23	2.64606e-23	6.68362e-21	9.76092e-22	9.76092e-22
G	79	P	9.26811e-20	1.4604e-22	1.4604e-22	1.81092e-12	2.96668e-21	2.96668e-21
D	80	T	5.9584e-31	6.81948e-30	5.9584e-31	6.71254e-41	5.0257e-22	6.71254e-41
D	80	N	8.51447e-38	6.65894e-33	8.51447e-38	3.81798e-28	8.87173e-19	3.81798e-28
D	80	K	9.93261e-29	2.49305e-33	2.49305e-33	7.5751e-28	8.70345e-18	7.5751e-28
D	80	H	3.10384e-23	2.88846e-23	2.88846e-23	1.73443e-26	1.59118e-16	1.73443e-26
D	80	W	4.58982e-34	1.07991e-25	4.58982e-34	3.29892e-26	2.14199e-23	3.29892e-26
D	80	F	2.62182e-25	8.1623e-21	2.62182e-25	3.91891e-26	1.37974e-12	3.91891e-26
D	80	Q	1.21959e-24	3.4224e-27	3.4224e-27	2.22914e-24	1.50934e-24	1.50934e-24
D	80	E	2.18531e-25	5.28959e-26	5.28959e-26	3.05099e-20	4.07665e-24	4.07665e-24
D	80	I	6.6547e-31	2.13725e-20	6.6547e-31	4.44184e-21	1.50341e-23	1.50341e-23
D	80	S	1.41408e-33	7.91398e-27	1.41408e-33	6.47706e-23	2.06748e-17	6.47706e-23
D	80	A	5.48189e-14	3.96606e-16	3.96606e-16	4.50864e-14	1.0355e-22	1.0355e-22
D	80	L	1.05186e-23	3.86918e-19	1.05186e-23	2.86322e-21	5.43528e-18	2.86322e-21
D	80	M	6.42573e-26	2.39814e-28	2.39814e-28	5.35528e-21	1.0482e-16	5.35528e-21
D	80	G	9.29434e-20	7.83804e-27	7.83804e-27	9.07965e-20	2.71912e-16	9.07965e-20
D	80	V	1.6569e-32	3.07821e-33	3.07821e-33	1.88293e-19	1.7693e-12	1.88293e-19
D	80	C	3.52014e-29	1.60235e-27	3.52014e-29	7.70975e-19	1.28634e-12	7.70975e-19
D	80	R	2.18306e-34	1.69143e-22	2.18306e-34	2.06355e-17	1.74557e-12	2.06355e-17
D	80	P	8.80167e-20	1.7422e-16	8.80167e-20	1.4853e-13	1.55161e-15	1.55161e-15
D	80	Y	4.57442e-17	1.04606e-24	1.04606e-24	1.68154e-15	9.63194e-14	1.68154e-15
P	81	N	1.8703e-32	7.37496e-56	7.37496e-56	3.15241e-38	6.04308e-31	3.15241e-38
P	81	D	1.36733e-53	5.23072e-49	1.36733e-53	2.36182e-36	6.0559e-25	2.36182e-36
P	81	V	2.72832e-43	4.83817e-39	2.72832e-43	2.66392e-34	1.85566e-25	2.66392e-34
P	81	Q	4.16807e-33	2.35359e-33	2.35359e-33	1.85332e-32	2.2291e-19	1.85332e-32
P	81	E	4.50036e-46	1.69457e-44	4.50036e-46	3.37184e-23	2.3806e-32	2.3806e-32
P	81	T	2.43699e-44	2.0718e-32	2.43699e-44	1.01298e-28	3.5253e-32	3.5253e-32
P	81	F	8.80517e-30	1.10321e-27	8.80517e-30	1.11863e-31	1.90242e-20	1.11863e-31
P	81	I	1.15803e-36	8.58253e-48	8.58253e-48	5.02263e-30	8.76295e-25	5.02263e-30
P	81	H	8.52386e-24	5.39897e-29	5.39897e-29	1.47067e-25	1.37466e-28	1.37466e-28
P	81	M	1.14795e-32	3.19367e-24	1.14795e-32	6.71516e-28	6.52676e-15	6.71516e-28
P	81	S	1.14436e-34	1.3947e-45	1.3947e-45	2.83074e-27	4.56829e-18	2.83074e-27
P	81	G	5.83022e-41	4.97206e-27	5.83022e-41	1.21442e-26	1.29127e-24	1.21442e-26
P	81	L	4.29609e-35	1.93661e-37	1.93661e-37	1.66781e-25	1.68527e-21	1.66781e-25
P	81	A	2.42669e-51	3.01936e-45	2.42669e-51	1.79283e-25	6.33129e-25	1.79283e-25
P	81	C	3.19776e-18	2.58207e-21	2.58207e-21	7.79738e-18	3.29401e-24	3.29401e-24
P	81	Y	5.56074e-23	3.73755e-31	3.73755e-31	1.05865e-23	1.0071e-21	1.05865e-23
P	81	R	2.67903e-27	1.07495e-34	1.07495e-34	6.78179e-21	5.39122e-16	6.78179e-21
P	81	K	1.98588e-26	2.99255e-42	2.99255e-42	1.24501e-15	8.53498e-19	8.53498e-19
P	81	W	3.02872e-09	1.46423e-13	1.46423e-13	3.94236e-15	3.77372e-06	3.94236e-15
T	82	P	3.36001e-60	1.08046e-57	3.36001e-60	9.98086e-47	4.55856e-32	9.98086e-47
T	82	S	4.28563e-59	1.54996e-45	4.28563e-59	6.12004e-43	1.21355e-24	6.12004e-43
T	82	D	4.35409e-38	4.07451e-51	4.07451e-51	3.02027e-36	2.88493e-29	3.02027e-36
T	82	H	3.96435e-41	1.7564e-42	1.7564e-42	4.036e-35	3.29055e-22	4.036e-35
T	82	Y	2.16218e-32	6.19935e-55	6.19935e-55	1.92586e-30	1.06917e-23	1.92586e-30
T	82	I	2.94537e-36	3.88962e-47	3.88962e-47	8.74112e-29	1.08813e-25	8.74112e-29
T	82	E	1.20579e-34	1.63369e-27	1.20579e-34	1.89936e-28	2.68636e-17	1.89936e-28
T	82	N	4.85066e-46	3.43035e-36	4.85066e-46	1.0285e-27	1.86799e-13	1.0285e-27
T	82	C	4.11699e-35	5.84825e-42	5.84825e-42	2.75174e-22	6.47137e-25	6.47137e-25
T	82	A	1.01058e-61	1.40011e-32	1.01058e-61	1.31568e-24	2.69685e-22	1.31568e-24
T	82	G	7.43661e-31	4.77628e-24	7.43661e-31	8.04225e-24	6.9934e-24	6.9934e-24
T	82	F	3.54831e-22	5.97842e-29	5.97842e-29	1.18929e-20	1.75574e-15	1.18929e-20
T	82	K	9.88061e-20	3.10781e-15	9.88061e-20	1.78906e-12	1.42746e-18	1.42746e-18
T	82	R	4.38024e-26	7.38107e-18	4.38024e-26	1.00185e-17	8.40147e-13	1.00185e-17
T	82	V	4.32451e-17	1.16673e-14	4.32451e-17	1.12174e-16	1.91394e-12	1.12174e-16
T	82	W	5.84487e-15	2.84938e-15	2.84938e-15	4.2108e-13	2.57313e-16	2.57313e-16
T	82	Q	3.20382e-28	5.48061e-27	3.20382e-28	3.96755e-14	1.16827e-08	3.96755e-14
T	82	L	9.67291e-13	1.42331e-18	1.42331e-18	9.37286e-14	1.5394e-13	9.37286e-14
T	82	M	1.31634e-13	5.07162e-13	1.31634e-13	5.05662e-08	4.30463e-11	4.30463e-11
G	83	L	2.45475e-28	2.84126e-38	2.84126e-38	4.82332e-37	5.84417e-23	4.82332e-37
G	83	H	1.38255e-31	6.27485e-26	1.38255e-31	2.48525e-34	5.6042e-24	2.48525e-34
G	83	C	1.36617e-39	2.99176e-28	1.36617e-39	4.92003e-33	9.49712e-29	4.92003e-33
G	83	N	6.56133e-37	1.56939e-27	6.56133e-37	7.75357e-29	9.76523e-33	9.76523e-33
G	83	T	8.06176e-30	7.61405e-36	7.61405e-36	6.64886e-29	3.06241e-31	3.06241e-31
G	83	Q	1.13988e-45	2.83899e-42	1.13988e-45	2.60042e-29	5.87639e-30	5.87639e-30
G	83	R	2.29533e-29	1.49154e-23	2.29533e-29	2.97571e-29	2.91216e-14	2.97571e-29
G	83	W	4.62436e-27	1.54991e-27	1.54991e-27	7.55202e-28	1.83581e-16	7.55202e-28
G	83	M	3.04403e-31	5.08704e-31	3.04403e-31	1.8859e-23	2.90609e-27	2.90609e-27
G	83	I	7.23518e-38	2.79362e-44	2.79362e-44	6.59308e-26	4.53129e-27	4.53129e-27
G	83	V	2.04637e-37	6.04267e-51	6.04267e-51	9.49435e-27	7.1766e-23	9.49435e-27
G	83	D	8.69545e-43	1.70283e-33	8.69545e-43	1.64565e-21	9.67719e-26	9.67719e-26
G	83	F	2.81986e-21	1.06399e-22	1.06399e-22	1.44689e-24	4.20799e-20	1.44689e-24
G	83	K	1.273e-45	5.21873e-30	1.273e-45	4.0324e-23	2.76219e-19	4.0324e-23
G	83	E	6.54425e-29	7.27398e-30	7.27398e-30	6.22775e-23	2.26703e-17	6.22775e-23
G	83	S	2.35691e-34	1.14042e-35	1.14042e-35	1.07341e-21	3.47649e-15	1.07341e-21
G	83	A	3.24586e-16	3.22002e-16	3.22002e-16	1.45751e-21	1.83722e-12	1.45751e-21
G	83	P	4.84767e-21	2.06374e-18	4.84767e-21	2.23063e-16	1.51192e-18	1.51192e-18
G	83	Y	1.10915e-25	1.7031e-20	1.10915e-25	4.51675e-15	5.12623e-18	5.12623e-18
P	84	K	1.95816e-45	8.46861e-37	1.95816e-45	7.90431e-34	2.67224e-16	7.90431e-34
P	84	Y	3.71803e-29	4.42552e-47	4.42552e-47	5.14508e-33	7.29453e-18	5.14508e-33
P	84	G	2.36418e-28	2.01334e-36	2.01334e-36	3.89985e-23	8.37491e-30	8.37491e-30
P	84	E	9.13605e-23	1.38013e-31	1.38013e-31	4.40299e-29	8.31539e-14	4.40299e-29
P	84	S	4.59689e-33	3.4146e-37	3.4146e-37	1.37687e-28	2.29273e-16	1.37687e-28
P	84	R	1.75823e-22	1.79963e-43	1.79963e-43	1.18904e-27	2.12847e-23	1.18904e-27
P	84	T	3.25384e-29	2.47501e-40	2.47501e-40	1.61199e-25	3.90005e-21	1.61199e-25
P	84	V	7.4226e-23	2.1861e-18	7.4226e-23	1.79704e-25	1.16301e-19	1.79704e-25
P	84	W	6.13791e-36	3.60394e-29	6.13791e-36	2.06997e-25	2.54664e-21	2.06997e-25
P	84	M	2.5504e-31	1.84805e-33	1.84805e-33	2.90368e-19	1.79063e-22	1.79063e-22
P	84	H	2.55047e-31	6.08009e-22	2.55047e-31	4.17105e-22	2.25666e-18	4.17105e-22
P	84	Q	2.14911e-26	4.66206e-30	4.66206e-30	1.16309e-19	2.63523e-21	2.63523e-21
P	84	L	6.19571e-24	1.01084e-31	1.01084e-31	6.83678e-15	2.654e-21	2.654e-21
P	84	N	1.18459e-24	8.95275e-30	8.95275e-30	1.97314e-15	1.16891e-20	1.16891e-20
P	84	D	1.1692e-15	1.78462e-16	1.78462e-16	1.14113e-19	7.10085e-12	1.14113e-19
P	84	I	3.65978e-26	3.77505e-20	3.65978e-26	4.11461e-17	1.76415e-17	1.76415e-17
P	84	F	4.45732e-25	6.29582e-23	4.45732e-25	1.88784e-17	9.89715e-14	1.88784e-17
P	84	A	1.36546e-23	2.7024e-25	2.7024e-25	2.92721e-16	1.07136e-16	1.07136e-16
P	84	C	4.24004e-38	1.34819e-22	4.24004e-38	4.95768e-13	1.79041e-15	1.79041e-15
K	85	H	1.38961e-26	3.67553e-42	3.67553e-42	1.15567e-31	4.04294e-30	1.15567e-31
K	85	S	1.97838e-23	1.93373e-31	1.93373e-31	4.40944e-29	1.18591e-28	4.40944e-29
K	85	N	3.95076e-31	3.46579e-37	3.46579e-37	5.7242e-26	1.21103e-22	5.7242e-26
K	85	P	4.57846e-29	4.25105e-31	4.25105e-31	1.32955e-24	2.36523e-16	1.32955e-24
K	85	V	3.3854e-40	1.55781e-34	3.3854e-40	4.35034e-22	5.91287e-24	5.91287e-24
K	85	D	8.20838e-25	1.10028e-35	1.10028e-35	1.03203e-18	1.77379e-23	1.77379e-23
K	85	A	4.11298e-26	1.99385e-35	1.99385e-35	2.36312e-22	1.03782e-20	2.36312e-22
K	85	I	8.85008e-25	7.31293e-34	7.31293e-34	3.27121e-17	7.1258e-22	7.1258e-22
K	85	L	3.20431e-35	5.2837e-36	5.2837e-36	1.01942e-20	1.70051e-21	1.70051e-21
K	85	M	4.40833e-28	1.29002e-30	1.29002e-30	1.77007e-20	9.9414e-13	1.77007e-20
K	85	Y	2.75021e-22	7.59989e-26	7.59989e-26	2.58567e-20	2.82858e-18	2.58567e-20
K	85	C	2.5444e-26	1.52812e-27	1.52812e-27	2.91417e-20	2.51322e-10	2.91417e-20
K	85	T	1.34864e-28	2.45047e-30	2.45047e-30	3.10419e-20	2.45034e-15	3.10419e-20
K	85	Q	5.26237e-27	2.52424e-42	2.52424e-42	3.64782e-20	5.13152e-15	3.64782e-20
K	85	E	1.9465e-05	2.26479e-05	1.9465e-05	1.71983e-11	3.95095e-20	3.95095e-20
K	85	W	2.71193e-22	6.47275e-28	6.47275e-28	9.43756e-19	2.99672e-11	9.43756e-19
K	85	R	4.05037e-18	3.9459e-33	3.9459e-33	1.39077e-18	1.3862e-17	1.39077e-18
K	85	G	2.86217e-20	1.31426e-24	1.31426e-24	6.2324e-14	1.45116e-15	1.45116e-15
K	85	F	3.98574e-22	7.42754e-22	3.98574e-22	2.22868e-12	8.94447e-11	2.22868e-12
E	86	P	3.66005e-26	5.65163e-35	5.65163e-35	1.6767e-26	2.5522e-36	2.5522e-36
E	86	Q	8.2011e-26	1.65013e-23	8.2011e-26	2.87577e-29	1.93753e-11	2.87577e-29
E	86	N	1.34261e-31	1.35768e-31	1.34261e-31	8.91724e-27	2.86451e-19	8.91724e-27
E	86	M	2.54116e-25	1.07893e-16	2.54116e-25	4.10124e-26	6.03681e-09	4.10124e-26
E	86	K	1.11731e-47	4.81716e-32	1.11731e-47	1.41211e-25	5.54626e-21	1.41211e-25
E	86	R	5.15871e-29	1.88464e-43	1.88464e-43	5.55559e-25	6.62103e-25	5.55559e-25
E	86	F	1.82684e-18	1.69381e-32	1.69381e-32	8.04368e-23	1.81661e-12	8.04368e-23
E	86	W	2.79642e-33	1.36534e-27	2.79642e-33	1.10704e-16	2.00785e-22	2.00785e-22
E	86	S	2.07794e-23	4.40364e-25	4.40364e-25	1.37547e-21	2.78696e-21	1.37547e-21
E	86	H	2.93694e-29	3.97394e-26	2.93694e-29	1.06614e-19	2.0398e-21	2.0398e-21
E	86	I	1.87695e-38	6.23602e-22	1.87695e-38	3.46346e-20	3.01394e-13	3.46346e-20
E	86	L	1.22661e-24	7.8257e-29	7.8257e-29	4.47605e-20	1.30825e-19	4.47605e-20
E	86	T	4.37489e-24	5.74376e-26	5.74376e-26	2.34145e-17	3.71513e-19	3.71513e-19
E	86	V	1.25666e-28	5.22409e-25	1.25666e-28	6.82039e-18	7.02168e-19	7.02168e-19
E	86	Y	8.85392e-20	4.47216e-21	4.47216e-21	1.95722e-17	1.0819e-12	1.95722e-17
E	86	D	5.62428e-32	2.71092e-22	5.62428e-32	4.65203e-16	2.9868e-17	2.9868e-17
E	86	G	2.61029e-22	9.169e-15	2.61029e-22	1.47218e-12	7.27876e-11	1.47218e-12
E	86	C	1.20191e-23	7.03119e-17	1.20191e-23	1.04388e-11	4.14274e-12	4.14274e-12
E	86	A	6.3322e-17	6.37172e-10	6.3322e-17	4.55382e-09	3.87947e-07	4.55382e-09

## Sheet: p values nonsense <50%>
Ref aa	Position #	Alt aa	Jurkat1.pval	Jurkat.2.pval	Jurkat.pval	LentiX293T.1.pval	LentiX293T.2.pval	LentiX293T.pval
E	2	_
P	3	_
P	6	_
W	11	_
P	14	_
G	15	_
Q	17	_				1
C	22	_
N	24	_
C	25	_	0.0244693	0.00211388			0.108313
Y	26	_
K	28	_
C	31	_
F	32	_
Q	35	_		0.435636
C	37	_					0.666667
T	40	_	0.00333504				0.043023
S	46	_
Y	47	_
R	49	_
R	56	_	0.162569	0.20948			0.164253
N	61	_
S	62	_
Q	66	_
S	70	_	1				1
K	71	_
E	86	_

## Sheet: Column Tab definitions
column	description						tab	description
Ref aa	Tat amino acid position						p and q missense	p values and q values for missense mutations
Position #	reference amino acid for Tat position in row						p and q nonsense	p values and q values for nonsense mutations
Mutant aa	mutant amino acid for Tat position in row						p values missense <50%>	p values for percentage of GFP+ reads different from 0.5 for missense mutations
label	cell type.sample #.statistic						p values nonsense <50%>	p values for percentage of GFP+ reads different from 0.5 for nonsense mutations
