# Supplementary material for: GigaAssay – a high-throughput assay system for molecular functions and cell processes
Source: Research Square preprint supplement (doi:10.21203/rs.3.rs-708936/v1), 2021-07-12
Supplement: Supplementary file 8 [file 263299b4c7af57cf7bbb66ea.xlsx]

## Sheet: Tat Activities LentiX293T
Sample #			1	2	1	2	1	2	1	2	1	2
Position	Ref AA	Alt AA	%GFP+ rpm	%GFP+ rpm	GFP+ rpm	GFP+ rpm	GFP- rpm	GFP- rpm	Total rpm	Total rpm	Barcode #	Barcode #
2	E	STOP	10.8316	7.1769	0.842145	0.701787	6.93271	9.07664	7.77485	9.77843	2	1
3	P	STOP	0	0	0	0	1.90349	2.77843	1.90349	2.77843	1	2
6	P	STOP	0	18.7938	0	0.567278	1.48272	2.45116	1.48272	3.01844	1	1
11	W	STOP	0	0	0	0	7.33344	7.13308	7.33344	7.13308	13	13
14	P	STOP	7.95798	5.00879	2.93581	3.41537	33.9556	64.7721	36.8914	68.1874	2	3
17	Q	STOP	7.29456	7.16171	0.684243	1.00005	8.69594	12.9638	9.38018	13.9638	7	9
25	C	STOP	4.37409	0	0.245626	0	5.36984	11.5612	5.61547	11.5612	9	8
31	C	STOP	0	0	0	0	2.725	6.25146	2.725	6.25146	2	6
32	F	STOP	8.87792	15.7218	0.693015	1.28953	7.11304	6.91267	7.80605	8.20221	1	1
35	Q	STOP	0	3.1069	0	0.228081	4.28786	7.11304	4.28786	7.34112	2	4
40	T	STOP	7.57994	3.36475	0.812904	0.830448	9.9115	23.8504	10.7244	24.6808	3	2
46	S	STOP	0	0	0	0	3.17582	6.14126	3.17582	6.14126	1	1
49	R	STOP	13.4603	12.6764	0.71056	0.8246	4.56837	5.68041	5.27893	6.50501	2	2
56	R	STOP	0	14.9697	0	0.666698	2.54466	3.78694	2.54466	4.45364	2	5

## Sheet: Tat Activities Jurkat
Sample #			1	2	1	2	1	2	1	2	1	2
Position	Ref AA	Alt AA	%GFP+ rpm	%GFP+ rpm	GFP+ rpm	GFP+ rpm	GFP- rpm	GFP- rpm	Total rpm	Total rpm	Barcode #	Barcode #
2	E	STOP	6.4354	19.366	0.456162	0.842145	6.63216	3.50643	7.08832	4.34857	2	1
11	W	STOP	4.03968	21.1529	0.26317	1.26322	6.25146	4.70863	6.51463	5.97185	11	11
14	P	STOP	20.6129	22.9057	7.64948	4.97684	29.4607	16.7507	37.1102	21.7275	2	3
17	Q	STOP	15.5712	12.1816	1.94746	0.56143	10.5594	4.04742	12.5068	4.60885	6	1
25	C	STOP	10.4545	6.88983	0.666698	0.315804	5.71047	4.26782	6.37717	4.58363	4	6
32	F	STOP	20.4852	21.777	1.47375	1.57025	5.72049	5.64034	7.19424	7.21059	1	1
35	Q	STOP	6.80065	30.7954	0.456162	0.543885	6.25146	1.22224	6.70762	1.76613	3	3
40	T	STOP	20.6564	13.5601	2.01179	1.21643	7.7275	7.75421	9.73929	8.97065	3	2
46	S	STOP	0	10.6795	0	0.29826	1.2022	2.49457	1.2022	2.79283	3	1
56	R	STOP	13.6794	18.4087	1.03514	0.736877	6.53197	3.26599	7.56711	4.00286	5	4
66	Q	STOP	61.9216	87.7315	1.59657	1.71938	0.9818	0.240441	2.57837	1.95982	5	4
70	S	STOP	48.0084	100	1.01759	4.96515	1.10202	0	2.11961	4.96515	2	1
86	E	STOP	72.9405	100	2.75452	2.10536	1.02187	0	3.77639	2.10536	2	1

## Sheet: Column definitions
Column	Description
Position	Tat amino acid position
Ref AA	reference amino acid for Tat position in row
Alt AA	mutant amino acid for Tat position in row
%GFP+ rpm	Tat Transcriptional activity as a percentage of wild type activity in reads per million (rpm) to normalize among samples
GFP+ rpm	Tat Transcriptional activity GFP positive pool reads in reads per million (rpm) to normalize among samples
GFP- rpm	Tat Transcriptional activity GFP negative pool reads in reads per million (rpm) to normalize among samples
Total rpm	Tat Transcriptional activity total reads from GFP positive and negative pools in reads per million (rpm) to normalize among samples
Barcode #	Number of barcodes for each mutation
